# Supplementary material for: Changes in soil bacterial and fungal communities in response to Bacillus megaterium NCT-2 inoculation in secondary salinized soil
Source: PeerJ. 2021 Oct 12;9:e12309. doi: 10.7717/peerj.12309 (PMC8519178; doi:10.7717/peerj.12309)
Supplement: Supplemental Information 10 [file peerj-09-12309-s010.xlsx]

## Sheet: Data of Figure 1
NO3-
	NCT-2			Straws
0	0.693822	0.732935	0.7149	0.693822	0.732935	0.7149
7	0.0912286	0.186886	0.2418	0.240029	0.256414	0.263943
14	0.187771	0.268036	0.3183	0.436214	0.360043	0.263943
28	0.455036	0.372014	0.528057	1.38961	0.202014	0.528814
72	0.2697	0.121786	0.173157	1.19084	0.433114	0.574829
Cl-
	NCT-2			Straws
0	0.355	0.5325	0.26625	0.355	0.5325	0.26625
7	0.24225	0.28625	0.27025	0.1875	0.1795	0.1675
14	0.0885	0.0863	0.08847	0.0885	0.0885	0.17725
28	0.08875	0.06835	0.08875	0.08875	0.26625	0.1775
72	0.1775	0.1775	0.1775	0.1775	0.1775	0.1775
HCO3-
	NCT-2			Straws
0	0.122	0.0915	0.10675	0.122	0.0915	0.10675
7	0.122	0.122	0.122	0.1525	0.1525	0.122
14	0.0965	0.0935	0.0845	0.1525	0.0915	0.1525
28	0.0915	0.0915	0.0915	0.0915	0.061	0.0915
72	0.122	0.183	0.122	0.244	0.122	0.0915
SO4-
	NCT-2			Straws
0	0.84	0.816	0.831	0.84	0.816	0.831
7	0.286	0.486	0.416	0.672	1.008	0.84
14	0.36	0.576	0.384	0.744	0.216	0.216
28	0.212	0.375	0.313	0.504	0.566	0.55
72	0.048	0.72	0.408	0.216	0.456	0.528
Ca2+
	NCT-2			Straws
0	2.439	1.7695	2.10425	2.439	1.7695	2.10425
7	0.766	0.88775	0.455	0.703	1.689	0.72025
14	0.47675	0.72825	0.68175	0.4275	0.483	0.73025
28	0.76075	0.851925	0.982325	2.211	1.22175	1.67138
72	0.51775	0.82275	0.68525	0.8655	0.45575	0.810625
K+
	NCT-2			Straws
0	0.147	0.116	0.1315	0.147	0.116	0.1315
7	0.1905	0.15073	0.170645	0.833	0.53475	0.1465
14	0.10625	0.39775	0.27525	0.291	0.52575	0.408375
28	0.06375	0.07125	0.069	0.01925	0.1015	0.05025
72	0.32768	0.3955	0.345945	0.30725	0.236	0.280625
Mg2+
	NCT-2			Straws
0	0.745	0.5045	0.62475	0.745	0.5045	0.62475
7	0.227	0.27625	0.1395	0.20475	0.521	0.223
14	0.1645	0.2305	0.21875	0.1485	0.26675	0.192625
28	0.1435	0.1735	0.196	0.43625	0.2785	0.327375
72	0.16825	0.26835	0.21665	0.3155	0.12925	0.239875
Na+
	NCT-2			Straws
0	3.065	2.127	2.596	3.065	2.127	2.596
7	0.26	0.50925	0.30275	0.27775	0.85225	0.313
14	0.26775	0.4485	0.3595	0.2215	0.32325	0.39975
28	0.205	0.32225	0.11925	0.67075	0.2825	0.281625
72	0.3225	0.7075	0.8025	0.247	0.509	0.21525

## Sheet: Data of Figure 2
Phosphatase activity
	NCT-2			Straws
0	8260.8	14493.2	11377	8260.8	14493.2	11377
7	16049.1	9408.15	15128.6	12068.2	11487.5	13940.8
14	15469.7	10568.2	13918.9	14053.6	13255.7	6740.23
28	11510.9	12160	11519.4	7970.5	8950.72	8550.61
72	13201.4	13229.7	11088	10521.5	13045.6	13544.2
Urease Activity
	NCT-2			Straws
0	11.4195	20.5948	16.0072	11.4195	20.5948	16.0072
7	13.6041	14.1205	16.8611	18.0527	16.3051	11.8564
14	16.3356	15.8281	15.9769	16.4639	20.8331	24.1299
28	17.6555	23.8519	17.6953	18.6883	14.3191	15.3915
72	8.58299	8.54693	10.6386	10.1698	7.28473	4.39969
Soil organic matter
	NCT-2			Straws
0	26.6255	27.0806	26.853	26.6255	27.0806	26.853
7	30.0993	31.1355	30.5889	30.5355	29.5762	31.0293
14	31.2906	33.5663	31.2906	29.5763	27.9695	27.9629
28	28.5598	32.0871	30.6079	29.3563	29.9252	26.2841
72	28.356	27.8771	30.7217	28.2971	26.3617	26.9244
EC
	NCT-2			Straws
0	882	862	872	882	862	872
7	284	425	313	294	689	553
14	323	450	461	437	367	591
28	260	518	265	326	608	400
72	310	507	323	337	646	374
pH
	NCT-2			Straws
0	7.46	7.43	7.445	7.46	7.43	7.445
7	6.92	7.46	7.47	7.67	7.35	7.51
14	7.03	7.13	7.14	7.21	7.29	7.22
28	7.5	7.41	7.65	7.93	7.67	7.72
72	6.73	6.69	6.795	7.58	7	7.24

## Sheet: Data of Figure 3
NO3- in Brassica chinensis L.
Straw	NCT-2
0.33	0.203
0.524	0.147
0.226	0.073
0.446	0.191
0.332	0.241
0.19	0.166
VitaminC
Straw	NCT-2
0.0608071	0.0814623
0.0525776	0.0573035
0.0581997	0.055185
0.0498888	0.0709514
0.0520073	0.0575479
0.0618256	0.0576294
Chlorophyll in Brassica chinensis L.(mg m-2)
Straw	NCT-2
623	598
515	611
572	572
592	560
617	515
611	655
566	572
655	477
604	604
585	553
642	509
623	572
547	611
611	674
572	630
Fresh weight (g)
Straw	NCT-2
39.82	59.93
66.53	51.43
23.68	90.09
52.16	57.28
47.84	51.19
39.74	49.33
54.11	60.09
31.08	50.25
48.78	50.49
61.31	45.14
43.46	83.56
Height (cm)
Straw	NCT-2
14	14
14.5	13.8
13	27.8
11.2	15
17	14.9
13.2	13.8
Total production (kg)
Straw	NCT-2
197.02	228.06
168.08	192.76
182.55	210.41
