# Supplementary material for: Changes in soil bacterial and fungal communities in response to Bacillus megaterium NCT-2 inoculation in secondary salinized soil
Source: PeerJ. 2021 Oct 12;9:e12309. doi: 10.7717/peerj.12309 (PMC8519178; doi:10.7717/peerj.12309)
Supplement: Supplemental Information 11 [file peerj-09-12309-s011.xlsx]

## Sheet: OTU
Domain	Kingdom	Phylum	Class	Order	Family	Genus	Species	OTU	Before_1	Before_2	Before_3	N7D_1	N7D_2	N7D_3	N14D_1	N14D_2	N14D_3	N28D_1	N28D_2	N28D_3	N72D_1	N72D_2	N72D_3	S7D_1	S7D_2	S7D_3	S14D_1	S14D_2	S14D_3	S28D_1	S28D_2	S28D_3	S72D_1	S72D_2	S72D_3	SUM
d__Bacteria	k__norank_d__Bacteria	p__Acidobacteria	c__Acidobacteriia	o__Solibacterales	f__Solibacteraceae_Subgroup_3	g__AKIW659	s__uncultured_soil_bacterium_g__AKIW659	OTU4485	3	2	2	0	2	2	2	3	6	4	1	5	0	0	1	11	25	2	2	0	2	4	7	3	1	2	4	96
d__Bacteria	k__norank_d__Bacteria	p__Acidobacteria	c__Acidobacteriia	o__Solibacterales	f__Solibacteraceae_Subgroup_3	g__AKIW659	s__uncultured_bacterium_g__AKIW659	OTU2158	0	2	4	0	2	3	1	2	0	1	2	1	1	1	5	1	1	2	1	1	3	1	1	2	0	0	2	40
d__Bacteria	k__norank_d__Bacteria	p__Planctomycetes	c__Phycisphaerae	o__Phycisphaerales	f__Phycisphaeraceae	g__AKYG587	s__uncultured_planctomycete_g__AKYG587	OTU2285	6	2	1	1	4	2	0	0	0	2	6	3	0	3	8	0	0	2	3	3	2	1	2	3	0	5	5	64
d__Bacteria	k__norank_d__Bacteria	p__Planctomycetes	c__Phycisphaerae	o__Phycisphaerales	f__Phycisphaeraceae	g__AKYG587	s__uncultured_bacterium_g__AKYG587	OTU3938	1	16	2	0	2	0	0	1	7	2	6	0	0	1	5	0	7	0	3	1	0	0	2	3	2	1	3	65
d__Bacteria	k__norank_d__Bacteria	p__Planctomycetes	c__Phycisphaerae	o__Phycisphaerales	f__Phycisphaeraceae	g__AKYG587	s__uncultured_bacterium_g__AKYG587	OTU2688	2	4	2	0	3	5	2	0	0	2	7	5	1	4	5	0	1	0	2	2	0	2	0	0	0	0	6	55
d__Bacteria	k__norank_d__Bacteria	p__Proteobacteria	c__Gammaproteobacteria	o__Betaproteobacteriales	f__Burkholderiaceae	g__Achromobacter	s__unclassified_g__Achromobacter	OTU552	58	34	56	93	104	72	44	41	103	43	102	140	35	50	180	57	41	51	62	60	22	50	78	105	60	99	33	1873
d__Bacteria	k__norank_d__Bacteria	p__Proteobacteria	c__Gammaproteobacteria	o__Gammaproteobacteria_Incertae_Sedis	f__unclassified_o__Gammaproteobacteria_Incertae_Sedis	g__Acidibacter	s__uncultured_proteobacterium_g__Acidibacter	OTU644	3	5	2	1	1	2	8	0	3	4	5	3	0	8	3	3	2	4	2	3	5	7	2	2	3	0	7	88
d__Bacteria	k__norank_d__Bacteria	p__Proteobacteria	c__Gammaproteobacteria	o__Gammaproteobacteria_Incertae_Sedis	f__unclassified_o__Gammaproteobacteria_Incertae_Sedis	g__Acidibacter	s__uncultured_bacterium_g__Acidibacter	OTU137	8	9	2	2	4	5	4	7	5	6	5	1	2	2	3	2	3	6	6	2	6	5	4	6	6	4	3	118
d__Bacteria	k__norank_d__Bacteria	p__Proteobacteria	c__Gammaproteobacteria	o__Gammaproteobacteria_Incertae_Sedis	f__unclassified_o__Gammaproteobacteria_Incertae_Sedis	g__Acidibacter	s__uncultured_proteobacterium_g__Acidibacter	OTU1591	158	330	264	47	93	107	84	136	73	131	140	69	67	141	125	36	27	81	69	129	51	252	100	104	187	125	72	3198
d__Bacteria	k__norank_d__Bacteria	p__Proteobacteria	c__Gammaproteobacteria	o__Gammaproteobacteria_Incertae_Sedis	f__unclassified_o__Gammaproteobacteria_Incertae_Sedis	g__Acidibacter	s__unclassified_g__Acidibacter	OTU1	0	0	1	1	0	0	6	0	0	3	0	0	0	0	0	1	0	9	2	0	4	1	0	0	0	0	3	31
d__Bacteria	k__norank_d__Bacteria	p__Proteobacteria	c__Gammaproteobacteria	o__Gammaproteobacteria_Incertae_Sedis	f__unclassified_o__Gammaproteobacteria_Incertae_Sedis	g__Acidibacter	s__metagenome_g__Acidibacter	OTU851	9	5	8	6	2	8	11	4	5	10	3	6	5	5	9	2	3	17	2	14	4	10	3	6	5	8	3	173
d__Bacteria	k__norank_d__Bacteria	p__Proteobacteria	c__Gammaproteobacteria	o__Gammaproteobacteria_Incertae_Sedis	f__unclassified_o__Gammaproteobacteria_Incertae_Sedis	g__Acidibacter	s__uncultured_bacterium_g__Acidibacter	OTU3772	1	4	0	0	1	1	4	2	5	2	2	2	2	4	4	4	1	3	2	3	0	2	1	3	1	3	1	58
d__Bacteria	k__norank_d__Bacteria	p__Proteobacteria	c__Alphaproteobacteria	o__Acetobacterales	f__Acetobacteraceae	g__Acidicaldus	s__uncultured_bacterium_g__Acidicaldus	OTU3826	2	1	4	3	1	6	5	1	0	9	1	3	9	1	3	4	3	11	7	22	10	6	4	7	6	4	7	140
d__Bacteria	k__norank_d__Bacteria	p__Proteobacteria	c__Alphaproteobacteria	o__Acetobacterales	f__Acetobacteraceae	g__Acidicaldus	s__uncultured_bacterium_g__Acidicaldus	OTU187	1	2	1	1	0	0	5	3	2	5	1	0	5	0	1	4	1	4	8	3	3	2	0	2	1	0	3	58
d__Bacteria	k__norank_d__Bacteria	p__Acidobacteria	c__Acidobacteriia	o__Acidobacteriales	f__Acidobacteriaceae_Subgroup_1	g__Acidipila	s__uncultured_Acidobacteria_bacterium_g__Acidipila	OTU3882	35	6	58	9	11	33	284	48	20	36	6	14	31	5	4	6	4	75	96	107	173	22	7	16	11	15	62	1194
d__Bacteria	k__norank_d__Bacteria	p__Actinobacteria	c__Actinobacteria	o__Frankiales	f__Acidothermaceae	g__Acidothermus	s__uncultured_actinobacterium_g__Acidothermus	OTU2411	2	0	0	0	1	1	0	0	0	0	0	10	0	1	0	0	0	11	0	9	0	1	0	0	0	0	0	36
d__Bacteria	k__norank_d__Bacteria	p__Proteobacteria	c__Gammaproteobacteria	o__Pseudomonadales	f__Moraxellaceae	g__Acinetobacter	s__unclassified_g__Acinetobacter	OTU4435	10	17	6	0	6	0	3	2	2	5	6	3	3	1	5	7	2	8	1	2	1	3	3	2	4	2	4	108
d__Bacteria	k__norank_d__Bacteria	p__Proteobacteria	c__Gammaproteobacteria	o__Pseudomonadales	f__Moraxellaceae	g__Acinetobacter	s__unclassified_g__Acinetobacter	OTU1297	9	13	11	3	20	4	1	6	2	2	4	27	5	0	6	18	15	12	3	1	2	5	11	2	2	12	1	197
d__Bacteria	k__norank_d__Bacteria	p__Proteobacteria	c__Gammaproteobacteria	o__Pseudomonadales	f__Moraxellaceae	g__Acinetobacter	s__Acinetobacter_rudis_CIP_110305	OTU2081	25	5	35	1	1	6	0	0	3	0	0	1	1	1	4	0	0	0	0	0	0	0	3	0	1	0	0	87
d__Bacteria	k__norank_d__Bacteria	p__Actinobacteria	c__Actinobacteria	o__Micromonosporales	f__Micromonosporaceae	g__Actinoplanes	s__unclassified_g__Actinoplanes	OTU750	4	1	0	1	0	1	0	0	1	0	5	6	0	3	1	2	0	0	0	2	0	6	3	3	2	1	0	42
d__Bacteria	k__norank_d__Bacteria	p__Bacteroidetes	c__Bacteroidia	o__Cytophagales	f__Hymenobacteraceae	g__Adhaeribacter	s__uncultured_Adhaeribacter_sp.	OTU1423	0	2	1	1	3	7	0	4	18	0	1	7	1	1	16	0	2	1	17	1	1	1	1	2	0	8	0	96
d__Bacteria	k__norank_d__Bacteria	p__Bacteroidetes	c__Bacteroidia	o__Cytophagales	f__Hymenobacteraceae	g__Adhaeribacter	s__unclassified_g__Adhaeribacter	OTU1056	31	94	38	26	46	118	13	36	130	58	139	114	31	46	225	18	17	48	80	51	4	59	71	107	48	91	40	1779
d__Bacteria	k__norank_d__Bacteria	p__Bacteroidetes	c__Bacteroidia	o__Cytophagales	f__Hymenobacteraceae	g__Adhaeribacter	s__uncultured_bacterium_g__Adhaeribacter	OTU3855	2	4	0	0	1	2	1	0	4	1	1	0	0	0	12	0	0	0	0	3	0	0	1	5	0	7	0	44
d__Bacteria	k__norank_d__Bacteria	p__Actinobacteria	c__Actinobacteria	o__Propionibacteriales	f__Nocardioidaceae	g__Aeromicrobium	s__unclassified_g__Aeromicrobium	OTU3956	5	2	0	2	10	2	0	4	3	0	15	21	3	9	20	12	2	11	6	6	2	7	20	9	5	1	9	186
d__Bacteria	k__norank_d__Bacteria	p__Proteobacteria	c__Alphaproteobacteria	o__Rhizobiales	f__Xanthobacteraceae	g__Afipia	s__metagenome_g__Afipia	OTU2175	3	4	2	2	13	5	2	2	2	2	8	17	4	3	14	0	0	8	5	11	1	4	20	15	10	3	0	160
d__Bacteria	k__norank_d__Bacteria	p__Proteobacteria	c__Alphaproteobacteria	o__Rhizobiales	f__Stappiaceae	g__Agaricicola	s__Agaricicola_taiwanensis	OTU2565	0	0	0	1	33	3	0	4	0	1	4	1	0	1	4	4	2	1	2	0	0	2	2	5	0	1	0	71
d__Bacteria	k__norank_d__Bacteria	p__Actinobacteria	c__Actinobacteria	o__Micrococcales	f__Microbacteriaceae	g__Agromyces	s__Agromyces_ulmi	OTU748	6	8	1	0	21	5	0	0	1	4	24	44	3	15	10	13	6	16	11	4	1	19	21	25	17	0	3	278
d__Bacteria	k__norank_d__Bacteria	p__Proteobacteria	c__Gammaproteobacteria	o__Betaproteobacteriales	f__Burkholderiaceae	g__Alcaligenes	s__unclassified_g__Alcaligenes	OTU2121	69	4	168	2	6	2	3	1	1	2	13	3	0	0	3	5	1	0	4	7	0	5	2	9	0	0	1	311
d__Bacteria	k__norank_d__Bacteria	p__Proteobacteria	c__Gammaproteobacteria	o__Oceanospirillales	f__Alcanivoracaceae	g__Alcanivorax	s__Alcanivorax_pacificus_W11-5	OTU1613	4	0	0	3	0	3	1	5	1	0	0	1	1	0	0	6	1	5	0	0	0	0	0	0	2	1	0	34
d__Bacteria	k__norank_d__Bacteria	p__Bacteroidetes	c__Bacteroidia	o__Cytophagales	f__Cyclobacteriaceae	g__Algoriphagus	s__Algoriphagus_winogradskyi	OTU2317	0	0	0	9	1	2	0	1	2	8	0	0	2	0	2	9	0	14	0	4	0	1	2	1	1	0	0	59
d__Bacteria	k__norank_d__Bacteria	p__Bacteroidetes	c__Bacteroidia	o__Cytophagales	f__Cyclobacteriaceae	g__Algoriphagus	s__uncultured_bacterium_g__Algoriphagus	OTU350	1	7	1	18	43	11	9	6	64	152	56	54	28	12	202	15	13	12	54	6	4	33	26	48	27	32	54	988
d__Bacteria	k__norank_d__Bacteria	p__Bacteroidetes	c__Bacteroidia	o__Cytophagales	f__Cyclobacteriaceae	g__Algoriphagus	s__Algoriphagus_resistens	OTU4052	0	0	0	7	14	1	0	1	3	2	1	4	7	0	5	11	0	8	3	0	0	0	2	8	3	5	13	98
d__Bacteria	k__norank_d__Bacteria	p__Bacteroidetes	c__Bacteroidia	o__Cytophagales	f__Cyclobacteriaceae	g__Algoriphagus	s__uncultured_bacterium_g__Algoriphagus	OTU1008	1	0	2	4	0	2	2	1	5	9	0	1	2	0	0	9	1	4	2	0	1	2	1	0	0	0	1	50
d__Bacteria	k__norank_d__Bacteria	p__Bacteroidetes	c__Bacteroidia	o__Cytophagales	f__Cyclobacteriaceae	g__Algoriphagus	s__Algoriphagus_aestuariicola	OTU1040	1	2	0	3	16	6	1	5	70	12	11	13	1	0	40	5	1	5	12	5	0	4	5	13	15	6	8	260
d__Bacteria	k__norank_d__Bacteria	p__Bacteroidetes	c__Bacteroidia	o__Cytophagales	f__Cyclobacteriaceae	g__Algoriphagus	s__unclassified_g__Algoriphagus	OTU1630	0	6	0	20	41	5	1	12	87	24	24	83	3	5	153	1	7	12	30	7	3	8	37	47	9	52	25	702
d__Bacteria	k__norank_d__Bacteria	p__Proteobacteria	c__Gammaproteobacteria	o__Salinisphaerales	f__Solimonadaceae	g__Alkanibacter	s__unclassified_g__Alkanibacter	OTU1882	1	1	1	0	0	1	5	0	0	0	0	0	1	0	0	0	0	3	2	1	9	0	0	0	0	0	4	29
d__Bacteria	k__norank_d__Bacteria	p__Proteobacteria	c__Gammaproteobacteria	o__Salinisphaerales	f__Solimonadaceae	g__Alkanibacter	s__uncultured_bacterium_g__Alkanibacter	OTU4016	2	2	0	0	1	1	6	4	0	1	3	1	13	3	0	1	1	0	8	8	13	8	1	1	1	4	12	95
d__Bacteria	k__norank_d__Bacteria	p__Proteobacteria	c__Alphaproteobacteria	o__Rhizobiales	f__Rhizobiaceae	g__Allorhizobium-Neorhizobium-Pararhizobium-Rhizobium	s__unclassified_g__Allorhizobium-Neorhizobium-Pararhizobium-Rhizobium	OTU2169	10	7	8	29	102	73	6	12	15	14	62	117	23	18	41	44	12	38	26	22	5	32	97	78	16	41	14	962
d__Bacteria	k__norank_d__Bacteria	p__Proteobacteria	c__Alphaproteobacteria	o__Rhizobiales	f__Rhizobiaceae	g__Allorhizobium-Neorhizobium-Pararhizobium-Rhizobium	s__unclassified_g__Allorhizobium-Neorhizobium-Pararhizobium-Rhizobium	OTU405	2	3	2	2	6	17	2	5	3	3	6	12	4	5	19	5	3	14	12	0	0	22	18	13	19	6	6	209
d__Bacteria	k__norank_d__Bacteria	p__Proteobacteria	c__Alphaproteobacteria	o__Rhizobiales	f__Rhizobiaceae	g__Allorhizobium-Neorhizobium-Pararhizobium-Rhizobium	s__Agrobacterium_larrymoorei	OTU2475	6	2	3	1	21	7	1	0	6	0	4	7	1	2	6	2	0	6	2	4	1	2	7	6	1	2	0	100
d__Bacteria	k__norank_d__Bacteria	p__Proteobacteria	c__Alphaproteobacteria	o__Sphingomonadales	f__Sphingomonadaceae	g__Altererythrobacter	s__unclassified_g__Altererythrobacter	OTU1618	2	2	1	1	15	6	0	0	1	0	2	7	0	2	2	2	0	4	3	4	0	4	3	1	3	0	1	66
d__Bacteria	k__norank_d__Bacteria	p__Proteobacteria	c__Alphaproteobacteria	o__Sphingomonadales	f__Sphingomonadaceae	g__Altererythrobacter	s__uncultured_bacterium_g__Altererythrobacter	OTU1806	16	13	2	3	16	11	3	0	1	2	32	14	5	15	8	9	3	16	0	10	0	20	13	8	27	5	5	257
d__Bacteria	k__norank_d__Bacteria	p__Proteobacteria	c__Alphaproteobacteria	o__Sphingomonadales	f__Sphingomonadaceae	g__Altererythrobacter	s__unclassified_g__Altererythrobacter	OTU3832	8	3	2	1	8	4	1	0	0	1	9	10	3	14	14	3	1	8	1	4	2	6	9	1	10	3	2	128
d__Bacteria	k__norank_d__Bacteria	p__Verrucomicrobia	c__Verrucomicrobiae	o__Opitutales	f__Opitutaceae	g__Alterococcus	s__uncultured_bacterium_g__Alterococcus	OTU2387	2	7	1	0	3	0	2	1	1	0	6	0	2	3	3	0	1	1	1	4	1	3	0	2	1	1	1	47
d__Bacteria	k__norank_d__Bacteria	p__Proteobacteria	c__Alphaproteobacteria	o__Rhodobacterales	f__Rhodobacteraceae	g__Amaricoccus	s__uncultured_bacterium_g__Amaricoccus	OTU640	2	1	0	0	4	0	1	0	0	1	9	3	1	2	0	4	0	3	0	1	1	4	2	5	7	0	0	51
d__Bacteria	k__norank_d__Bacteria	p__Proteobacteria	c__Alphaproteobacteria	o__Rhodobacterales	f__Rhodobacteraceae	g__Amaricoccus	s__uncultured_bacterium_g__Amaricoccus	OTU1103	1	3	1	0	15	6	0	0	1	1	13	17	2	12	5	6	3	2	1	7	0	5	4	5	11	1	1	123
d__Bacteria	k__norank_d__Bacteria	p__Proteobacteria	c__Alphaproteobacteria	o__Rhizobiales	f__Rhizobiaceae	g__Aminobacter	s__unclassified_g__Aminobacter	OTU2391	2	1	0	3	9	3	3	0	1	1	2	11	4	3	10	4	0	9	1	6	1	2	1	6	8	1	3	95
d__Bacteria	k__norank_d__Bacteria	p__Actinobacteria	c__Actinobacteria	o__Pseudonocardiales	f__Pseudonocardiaceae	g__Amycolatopsis	s__unclassified_g__Amycolatopsis	OTU1818	17	4	2	1	2	1	0	1	0	0	0	4	3	2	6	0	0	1	0	0	1	1	2	3	0	0	0	51
d__Bacteria	k__norank_d__Bacteria	p__Firmicutes	c__Clostridia	o__Clostridiales	f__Clostridiaceae_1	g__Anaerobacter	s__Clostridium_polyendosporum	OTU4232	1	3	1	0	5	1	2	0	3	1	1	1	2	0	0	9	6	3	1	2	2	0	2	1	3	3	0	53
d__Bacteria	k__norank_d__Bacteria	p__Firmicutes	c__Clostridia	o__Clostridiales	f__Ruminococcaceae	g__Anaerobacterium	s__uncultured_bacterium_g__Anaerobacterium	OTU3475	1	2	0	0	1	1	1	2	1	1	2	2	3	1	4	4	8	1	1	3	0	1	1	7	3	3	2	56
d__Bacteria	k__norank_d__Bacteria	p__Proteobacteria	c__Deltaproteobacteria	o__Myxococcales	f__Archangiaceae	g__Anaeromyxobacter	s__unclassified_g__Anaeromyxobacter	OTU1431	3	1	0	0	5	0	0	1	2	1	1	2	1	4	0	4	7	2	0	1	0	4	2	1	2	0	0	44
d__Bacteria	k__norank_d__Bacteria	p__Proteobacteria	c__Deltaproteobacteria	o__Myxococcales	f__Archangiaceae	g__Anaeromyxobacter	s__uncultured_Anaeromyxobacter_sp._g__Anaeromyxobacter	OTU1694	3	3	0	1	1	1	0	0	1	0	0	4	0	1	1	11	4	1	0	1	1	0	1	0	2	0	1	38
d__Bacteria	k__norank_d__Bacteria	p__Actinobacteria	c__Actinobacteria	o__Kineosporiales	f__Kineosporiaceae	g__Angustibacter	s__uncultured_bacterium_g__Angustibacter	OTU89	10	6	3	2	5	5	2	0	1	0	5	10	3	4	0	7	0	11	2	9	4	5	4	4	3	1	5	111
d__Bacteria	k__norank_d__Bacteria	p__Proteobacteria	c__Gammaproteobacteria	o__Betaproteobacteriales	f__Burkholderiaceae	g__Aquabacterium	s__uncultured_Burkholderiales_bacterium_g__Aquabacterium	OTU167	0	0	1	0	12	2	1	92	9	5	4	2	0	0	1	1	1	1	13	6	2	6	11	6	2	2	12	192
d__Bacteria	k__norank_d__Bacteria	p__Proteobacteria	c__Gammaproteobacteria	o__Diplorickettsiales	f__Diplorickettsiaceae	g__Aquicella	s__unclassified_g__Aquicella	OTU3765	61	164	52	3	21	2	0	19	61	10	20	33	1	58	32	2	49	5	0	85	1	1	60	10	7	35	12	804
d__Bacteria	k__norank_d__Bacteria	p__Proteobacteria	c__Gammaproteobacteria	o__Diplorickettsiales	f__Diplorickettsiaceae	g__Aquicella	s__unclassified_g__Aquicella	OTU611	3	1	1	0	0	0	0	1	2	0	3	0	0	4	0	0	0	1	0	0	0	1	1	2	5	9	4	38
d__Bacteria	k__norank_d__Bacteria	p__Proteobacteria	c__Gammaproteobacteria	o__Diplorickettsiales	f__Diplorickettsiaceae	g__Aquicella	s__unclassified_g__Aquicella	OTU107	5	3	4	1	1	0	3	2	6	5	2	2	2	2	4	4	8	1	2	3	1	0	3	6	2	4	5	81
d__Bacteria	k__norank_d__Bacteria	p__Proteobacteria	c__Gammaproteobacteria	o__Diplorickettsiales	f__Diplorickettsiaceae	g__Aquicella	s__unclassified_g__Aquicella	OTU1828	7	4	6	0	5	2	1	3	2	9	6	6	9	5	18	4	2	11	10	4	4	22	5	5	32	7	11	200
d__Bacteria	k__norank_d__Bacteria	p__Proteobacteria	c__Gammaproteobacteria	o__Diplorickettsiales	f__Diplorickettsiaceae	g__Aquicella	s__unclassified_g__Aquicella	OTU23	3	2	4	1	1	0	1	2	4	1	1	0	0	4	1	0	0	3	0	12	0	1	4	6	8	3	3	65
d__Bacteria	k__norank_d__Bacteria	p__Proteobacteria	c__Gammaproteobacteria	o__Diplorickettsiales	f__Diplorickettsiaceae	g__Aquicella	s__uncultured_bacterium_g__Aquicella	OTU2604	4	1	3	1	2	2	0	1	0	1	2	1	2	2	2	1	0	5	2	3	3	2	1	1	2	3	3	50
d__Bacteria	k__norank_d__Bacteria	p__Proteobacteria	c__Gammaproteobacteria	o__Diplorickettsiales	f__Diplorickettsiaceae	g__Aquicella	s__unclassified_g__Aquicella	OTU2095	3	3	13	2	0	0	0	12	1	6	1	1	2	8	6	1	0	2	5	3	4	14	2	4	4	0	13	110
d__Bacteria	k__norank_d__Bacteria	p__Proteobacteria	c__Gammaproteobacteria	o__Diplorickettsiales	f__Diplorickettsiaceae	g__Aquicella	s__uncultured_bacterium_g__Aquicella	OTU1182	3	3	8	3	2	1	0	0	1	6	3	7	5	7	14	2	2	4	1	1	2	3	2	7	0	1	8	96
d__Bacteria	k__norank_d__Bacteria	p__Proteobacteria	c__Gammaproteobacteria	o__Diplorickettsiales	f__Diplorickettsiaceae	g__Aquicella	s__unclassified_g__Aquicella	OTU999	5	8	1	0	2	0	0	2	8	1	5	5	0	7	3	0	4	0	0	7	0	1	3	2	12	2	2	80
d__Bacteria	k__norank_d__Bacteria	p__Proteobacteria	c__Gammaproteobacteria	o__Diplorickettsiales	f__Diplorickettsiaceae	g__Aquicella	s__unclassified_g__Aquicella	OTU1492	37	32	47	6	14	18	16	10	13	23	10	13	23	25	34	3	4	22	11	9	11	46	18	14	64	22	30	575
d__Bacteria	k__norank_d__Bacteria	p__Proteobacteria	c__Gammaproteobacteria	o__Diplorickettsiales	f__Diplorickettsiaceae	g__Aquicella	s__unclassified_g__Aquicella	OTU1250	4	1	3	1	4	1	0	2	1	1	2	1	0	0	1	0	0	2	0	1	0	0	4	1	0	2	4	36
d__Bacteria	k__norank_d__Bacteria	p__Proteobacteria	c__Gammaproteobacteria	o__Diplorickettsiales	f__Diplorickettsiaceae	g__Aquicella	s__uncultured_gamma_proteobacterium_g__Aquicella	OTU46	2	2	0	1	0	1	1	9	0	0	18	1	1	1	1	2	0	0	4	0	0	1	8	0	1	31	0	85
d__Bacteria	k__norank_d__Bacteria	p__Proteobacteria	c__Gammaproteobacteria	o__Diplorickettsiales	f__Diplorickettsiaceae	g__Aquicella	s__unclassified_g__Aquicella	OTU173	5	4	6	2	2	1	2	1	0	2	0	0	7	0	3	0	0	3	0	1	0	1	3	1	4	3	6	57
d__Bacteria	k__norank_d__Bacteria	p__Proteobacteria	c__Gammaproteobacteria	o__Diplorickettsiales	f__Diplorickettsiaceae	g__Aquicella	s__unclassified_g__Aquicella	OTU1064	15	44	40	5	16	6	6	10	8	14	6	13	11	8	26	5	11	5	3	15	4	7	17	7	13	14	6	335
d__Bacteria	k__norank_d__Bacteria	p__Proteobacteria	c__Gammaproteobacteria	o__Diplorickettsiales	f__Diplorickettsiaceae	g__Aquicella	s__uncultured_bacterium_g__Aquicella	OTU2097	4	4	5	0	0	0	1	0	0	0	0	0	0	1	1	0	0	1	1	1	2	0	0	1	0	1	2	25
d__Bacteria	k__norank_d__Bacteria	p__Proteobacteria	c__Gammaproteobacteria	o__Diplorickettsiales	f__Diplorickettsiaceae	g__Aquicella	s__uncultured_bacterium_g__Aquicella	OTU4472	2	2	6	0	1	1	1	2	1	5	1	1	1	5	6	1	1	0	7	5	2	7	2	3	9	8	3	83
d__Bacteria	k__norank_d__Bacteria	p__Proteobacteria	c__Gammaproteobacteria	o__Diplorickettsiales	f__Diplorickettsiaceae	g__Aquicella	s__uncultured_bacterium_g__Aquicella	OTU2206	9	12	7	2	8	2	1	2	0	7	2	2	15	5	3	0	0	1	1	5	1	6	5	9	17	1	8	131
d__Bacteria	k__norank_d__Bacteria	p__Proteobacteria	c__Gammaproteobacteria	o__Diplorickettsiales	f__Diplorickettsiaceae	g__Aquicella	s__uncultured_bacterium_g__Aquicella	OTU1945	2	5	6	0	0	0	2	0	0	2	0	0	1	1	1	0	0	3	3	0	4	7	3	4	7	2	2	55
d__Bacteria	k__norank_d__Bacteria	p__Proteobacteria	c__Gammaproteobacteria	o__Diplorickettsiales	f__Diplorickettsiaceae	g__Aquicella	s__unclassified_g__Aquicella	OTU967	10	17	4	4	5	10	4	12	9	11	7	4	12	31	14	3	4	9	4	7	6	7	4	8	15	17	8	246
d__Bacteria	k__norank_d__Bacteria	p__Proteobacteria	c__Gammaproteobacteria	o__Diplorickettsiales	f__Diplorickettsiaceae	g__Aquicella	s__uncultured_bacterium_g__Aquicella	OTU1005	1	2	1	2	2	0	2	1	2	1	1	1	1	1	11	1	2	4	0	1	1	0	0	2	6	0	2	48
d__Bacteria	k__norank_d__Bacteria	p__Proteobacteria	c__Gammaproteobacteria	o__Diplorickettsiales	f__Diplorickettsiaceae	g__Aquicella	s__uncultured_Aquicella_sp._g__Aquicella	OTU2207	5	24	22	2	9	2	2	7	4	6	3	10	3	4	25	2	1	2	1	7	3	10	14	3	8	18	7	204
d__Bacteria	k__norank_d__Bacteria	p__Proteobacteria	c__Gammaproteobacteria	o__Diplorickettsiales	f__Diplorickettsiaceae	g__Aquicella	s__unclassified_g__Aquicella	OTU2186	5	2	7	3	1	1	1	0	1	6	0	0	0	1	0	0	0	1	0	1	0	0	2	6	1	2	1	42
d__Bacteria	k__norank_d__Bacteria	p__Proteobacteria	c__Gammaproteobacteria	o__Diplorickettsiales	f__Diplorickettsiaceae	g__Aquicella	s__uncultured_bacterium_g__Aquicella	OTU2139	33	31	24	3	8	7	3	17	7	19	5	11	12	43	21	1	3	3	4	27	3	9	20	14	29	19	26	402
d__Bacteria	k__norank_d__Bacteria	p__Proteobacteria	c__Gammaproteobacteria	o__Diplorickettsiales	f__Diplorickettsiaceae	g__Aquicella	s__uncultured_bacterium_g__Aquicella	OTU2131	27	16	53	13	9	2	12	17	18	34	20	6	29	32	18	10	4	11	9	31	7	24	21	14	24	49	30	540
d__Bacteria	k__norank_d__Bacteria	p__Proteobacteria	c__Gammaproteobacteria	o__Diplorickettsiales	f__Diplorickettsiaceae	g__Aquicella	s__unclassified_g__Aquicella	OTU3708	0	0	0	0	11	0	0	0	1	0	0	1	1	0	3	0	0	5	5	0	0	0	1	2	6	0	0	36
d__Bacteria	k__norank_d__Bacteria	p__Proteobacteria	c__Gammaproteobacteria	o__Diplorickettsiales	f__Diplorickettsiaceae	g__Aquicella	s__unclassified_g__Aquicella	OTU2167	31	30	8	3	7	8	3	55	7	5	97	18	14	93	31	3	2	12	15	15	6	5	34	78	16	71	32	699
d__Bacteria	k__norank_d__Bacteria	p__Proteobacteria	c__Gammaproteobacteria	o__Diplorickettsiales	f__Diplorickettsiaceae	g__Aquicella	s__uncultured_bacterium_g__Aquicella	OTU85	4	3	15	2	2	2	7	1	2	3	0	1	9	1	6	0	2	6	5	0	4	6	1	1	4	4	8	99
d__Bacteria	k__norank_d__Bacteria	p__Proteobacteria	c__Gammaproteobacteria	o__Diplorickettsiales	f__Diplorickettsiaceae	g__Aquicella	s__unclassified_g__Aquicella	OTU2384	4	2	7	2	1	2	0	0	0	1	3	1	4	3	0	0	0	8	0	2	3	0	0	0	2	2	11	58
d__Bacteria	k__norank_d__Bacteria	p__Proteobacteria	c__Gammaproteobacteria	o__Diplorickettsiales	f__Diplorickettsiaceae	g__Aquicella	s__unclassified_g__Aquicella	OTU2154	6	9	2	2	1	0	0	1	0	4	4	0	1	10	5	0	1	0	1	4	0	7	10	6	4	3	2	83
d__Bacteria	k__norank_d__Bacteria	p__Proteobacteria	c__Gammaproteobacteria	o__Diplorickettsiales	f__Diplorickettsiaceae	g__Aquicella	s__unclassified_g__Aquicella	OTU2629	48	116	23	0	19	5	2	13	8	10	9	9	2	5	20	1	4	0	5	25	2	3	18	5	23	14	13	402
d__Bacteria	k__norank_d__Bacteria	p__Proteobacteria	c__Gammaproteobacteria	o__Diplorickettsiales	f__Diplorickettsiaceae	g__Aquicella	s__uncultured_Aquicella_sp._g__Aquicella	OTU2162	6	1	2	5	1	1	2	4	1	1	3	0	1	1	1	0	0	0	0	4	0	0	5	0	2	4	2	47
d__Bacteria	k__norank_d__Bacteria	p__Proteobacteria	c__Gammaproteobacteria	o__Diplorickettsiales	f__Diplorickettsiaceae	g__Aquicella	s__unclassified_g__Aquicella	OTU2201	2	5	7	0	3	0	0	0	1	0	1	0	0	0	1	1	0	2	2	4	0	3	2	0	2	1	1	38
d__Bacteria	k__norank_d__Bacteria	p__Proteobacteria	c__Gammaproteobacteria	o__Diplorickettsiales	f__Diplorickettsiaceae	g__Aquicella	s__uncultured_gamma_proteobacterium_g__Aquicella	OTU2145	16	17	11	0	2	0	0	0	11	1	1	0	0	1	0	0	1	0	0	14	0	0	3	0	0	6	0	84
d__Bacteria	k__norank_d__Bacteria	p__Proteobacteria	c__Gammaproteobacteria	o__Diplorickettsiales	f__Diplorickettsiaceae	g__Aquicella	s__unclassified_g__Aquicella	OTU413	13	45	7	1	2	0	0	0	2	0	3	0	2	6	2	0	1	1	0	8	0	0	3	8	23	5	2	134
d__Bacteria	k__norank_d__Bacteria	p__Proteobacteria	c__Gammaproteobacteria	o__Diplorickettsiales	f__Diplorickettsiaceae	g__Aquicella	s__unclassified_g__Aquicella	OTU2478	2	12	2	0	2	0	1	0	11	0	0	3	1	4	3	1	2	0	0	13	0	0	6	2	0	2	2	69
d__Bacteria	k__norank_d__Bacteria	p__Proteobacteria	c__Gammaproteobacteria	o__Diplorickettsiales	f__Diplorickettsiaceae	g__Aquicella	s__uncultured_bacterium_g__Aquicella	OTU2134	3	4	6	3	1	1	2	0	1	1	2	2	4	1	0	0	1	1	1	0	0	3	1	5	4	2	2	51
d__Bacteria	k__norank_d__Bacteria	p__Bacteroidetes	c__Bacteroidia	o__Chitinophagales	f__Chitinophagaceae	g__Arachidicoccus	s__uncultured_bacterium_g__Arachidicoccus	OTU1548	33	4	26	51	5	60	73	27	1	15	1	8	95	1	1	59	9	27	11	5	148	5	10	14	3	5	29	726
d__Bacteria	k__norank_d__Bacteria	p__Proteobacteria	c__Deltaproteobacteria	o__Myxococcales	f__Archangiaceae	g__Archangium	s__Archangium_gephyra	OTU3300	7	18	9	2	14	22	4	4	12	6	26	22	19	20	22	11	4	18	13	22	10	18	22	28	17	12	13	395
d__Bacteria	k__norank_d__Bacteria	p__Bacteroidetes	c__Bacteroidia	o__Sphingobacteriales	f__Sphingobacteriaceae	g__Arcticibacter	s__uncultured_bacterium_g__Arcticibacter	OTU643	0	3	0	3	8	29	6	5	33	16	7	15	3	3	48	9	6	26	12	4	1	9	9	34	5	8	7	309
d__Bacteria	k__norank_d__Bacteria	p__Bacteroidetes	c__Bacteroidia	o__Flavobacteriales	f__Flavobacteriaceae	g__Arenibacter	s__uncultured_bacterium_g__Arenibacter	OTU1173	0	4	0	2	20	1	1	0	15	0	2	64	1	1	64	4	2	0	0	2	0	10	2	10	8	3	0	216
d__Bacteria	k__norank_d__Bacteria	p__Bacteroidetes	c__Bacteroidia	o__Flavobacteriales	f__Flavobacteriaceae	g__Arenibacter	s__uncultured_bacterium_g__Arenibacter	OTU3822	0	3	3	0	1	0	0	0	0	1	4	2	1	1	16	0	0	0	0	5	0	0	2	0	0	13	1	53
d__Bacteria	k__norank_d__Bacteria	p__Proteobacteria	c__Gammaproteobacteria	o__Xanthomonadales	f__Xanthomonadaceae	g__Arenimonas	s__Arenimonas_donghaensis	OTU337	1	1	2	3	1	0	0	6	1	17	1	0	5	3	0	1	0	0	1	2	1	2	1	1	2	1	0	53
d__Bacteria	k__norank_d__Bacteria	p__Proteobacteria	c__Gammaproteobacteria	o__Xanthomonadales	f__Xanthomonadaceae	g__Arenimonas	s__Arenimonas_composti_TR7-09__DSM_18010	OTU443	17	43	13	22	17	41	13	37	88	104	21	40	37	10	81	11	8	12	37	16	9	30	19	42	19	19	35	841
d__Bacteria	k__norank_d__Bacteria	p__Proteobacteria	c__Gammaproteobacteria	o__Xanthomonadales	f__Xanthomonadaceae	g__Arenimonas	s__unclassified_g__Arenimonas	OTU1205	81	26	108	137	53	50	99	176	89	195	71	30	102	91	28	19	9	48	103	90	39	103	68	38	82	173	91	2199
d__Bacteria	k__norank_d__Bacteria	p__Proteobacteria	c__Gammaproteobacteria	o__Xanthomonadales	f__Xanthomonadaceae	g__Arenimonas	s__Arenimonas_metalli_CF5-1	OTU3108	2	2	1	2	4	3	27	6	41	785	6	3	21	0	17	1	2	0	7	4	5	6	19	104	6	9	12	1095
d__Bacteria	k__norank_d__Bacteria	p__Proteobacteria	c__Gammaproteobacteria	o__Xanthomonadales	f__Xanthomonadaceae	g__Arenimonas	s__unclassified_g__Arenimonas	OTU4556	1	4	2	2	3	17	12	6	34	47	6	22	10	1	22	31	5	20	18	11	1	10	18	12	8	17	3	343
d__Bacteria	k__norank_d__Bacteria	p__Proteobacteria	c__Gammaproteobacteria	o__Xanthomonadales	f__Xanthomonadaceae	g__Arenimonas	s__unclassified_g__Arenimonas	OTU3904	16	23	7	43	40	31	34	63	119	393	39	36	90	27	85	13	7	6	41	13	6	45	32	102	14	39	36	1400
d__Bacteria	k__norank_d__Bacteria	p__Proteobacteria	c__Gammaproteobacteria	o__Xanthomonadales	f__Xanthomonadaceae	g__Arenimonas	s__unclassified_g__Arenimonas	OTU3078	21	22	42	57	30	146	66	103	172	114	78	64	65	48	121	15	12	93	219	51	75	156	62	69	80	63	83	2127
d__Bacteria	k__norank_d__Bacteria	p__Proteobacteria	c__Gammaproteobacteria	o__Xanthomonadales	f__Xanthomonadaceae	g__Arenimonas	s__unclassified_g__Arenimonas	OTU3340	4	5	2	3	1	11	1	2	9	15	7	2	2	4	15	9	44	18	6	3	5	6	1	7	1	3	11	197
d__Bacteria	k__norank_d__Bacteria	p__Proteobacteria	c__Gammaproteobacteria	o__Xanthomonadales	f__Xanthomonadaceae	g__Arenimonas	s__unclassified_g__Arenimonas	OTU822	5	0	1	0	6	7	2	2	8	0	13	4	2	5	6	0	2	0	1	6	0	0	3	2	3	19	2	99
d__Bacteria	k__norank_d__Bacteria	p__Acidobacteria	c__Blastocatellia_Subgroup_4	o__Blastocatellales	f__Blastocatellaceae	g__Aridibacter	s__uncultured_bacterium_g__Aridibacter	OTU3447	2	3	1	0	3	1	0	0	4	1	3	5	0	3	7	0	1	4	0	7	3	5	6	3	8	2	0	72
d__Bacteria	k__norank_d__Bacteria	p__Actinobacteria	c__Actinobacteria	o__Micrococcales	f__Micrococcaceae	g__Arthrobacter	s__unclassified_g__Arthrobacter	OTU1018	210	113	85	159	287	75	20	16	56	87	158	337	62	63	134	158	67	116	118	82	22	141	388	242	150	44	21	3411
d__Bacteria	k__norank_d__Bacteria	p__Proteobacteria	c__Alphaproteobacteria	o__Caulobacterales	f__Caulobacteraceae	g__Asticcacaulis	s__uncultured_bacterium_g__Asticcacaulis	OTU28	0	0	0	2	33	1	1	0	1	0	0	0	0	0	0	2	1	0	1	0	0	0	3	7	0	0	0	52
d__Bacteria	k__norank_d__Bacteria	p__Proteobacteria	c__Alphaproteobacteria	o__Caulobacterales	f__Caulobacteraceae	g__Asticcacaulis	s__unclassified_g__Asticcacaulis	OTU2255	0	0	1	5	5	16	15	22	12	4	14	15	26	10	2	5	1	10	19	12	20	15	41	17	6	16	8	317
d__Bacteria	k__norank_d__Bacteria	p__Proteobacteria	c__Gammaproteobacteria	o__Betaproteobacteriales	f__Rhodocyclaceae	g__Azoarcus	s__unclassified_g__Azoarcus	OTU2908	30	33	22	14	42	22	8	25	86	23	205	56	7	38	64	7	17	5	8	51	3	36	26	68	78	89	33	1096
d__Bacteria	k__norank_d__Bacteria	p__Proteobacteria	c__Gammaproteobacteria	o__Betaproteobacteriales	f__Rhodocyclaceae	g__Azoarcus	s__unclassified_g__Azoarcus	OTU4206	11	11	5	2	9	2	3	2	9	1	22	9	2	7	14	20	7	4	3	12	2	7	2	5	12	13	1	197
d__Bacteria	k__norank_d__Bacteria	p__Firmicutes	c__Bacilli	o__Bacillales	f__Bacillaceae	g__Bacillus	s__unclassified_g__Bacillus	OTU2224	1	1	1	0	1	2	0	0	0	1	0	6	0	6	3	1	1	3	0	2	0	0	3	0	4	0	0	36
d__Bacteria	k__norank_d__Bacteria	p__Firmicutes	c__Bacilli	o__Bacillales	f__Bacillaceae	g__Bacillus	s__unclassified_g__Bacillus	OTU1974	631	524	188	48	328	241	86	35	99	112	435	247	160	438	320	512	659	713	80	287	40	293	226	340	525	209	146	7922
d__Bacteria	k__norank_d__Bacteria	p__Firmicutes	c__Bacilli	o__Bacillales	f__Bacillaceae	g__Bacillus	s__unclassified_g__Bacillus	OTU3107	57	23	23	7	20	15	5	2	9	21	18	19	10	20	10	114	210	64	5	14	3	24	27	34	31	4	9	798
d__Bacteria	k__norank_d__Bacteria	p__Firmicutes	c__Bacilli	o__Bacillales	f__Bacillaceae	g__Bacillus	s__unclassified_g__Bacillus	OTU2705	146	96	83	6	4	9	3	8	4	52	14	7	7	7	11	20	15	15	4	5	1	4	8	25	3	10	13	580
d__Bacteria	k__norank_d__Bacteria	p__Firmicutes	c__Bacilli	o__Bacillales	f__Bacillaceae	g__Bacillus	s__unclassified_g__Bacillus	OTU4605	67	45	19	2	37	28	4	3	16	10	64	22	13	47	31	81	114	85	8	32	2	33	32	41	69	20	11	936
d__Bacteria	k__norank_d__Bacteria	p__Firmicutes	c__Bacilli	o__Bacillales	f__Bacillaceae	g__Bacillus	s__unclassified_g__Bacillus	OTU3671	625	349	310	45	152	83	33	16	32	174	101	101	69	72	277	194	519	143	35	83	23	73	183	217	169	35	122	4235
d__Bacteria	k__norank_d__Bacteria	p__Firmicutes	c__Bacilli	o__Bacillales	f__Bacillaceae	g__Bacillus	s__Bacillus_marisflavi_g__Bacillus	OTU3689	15	9	4	0	9	6	0	1	2	5	13	8	2	3	5	12	7	10	1	2	2	4	6	12	6	4	2	150
d__Bacteria	k__norank_d__Bacteria	p__Firmicutes	c__Bacilli	o__Bacillales	f__Bacillaceae	g__Bacillus	s__unclassified_g__Bacillus	OTU3926	189	204	116	50	139	185	44	41	70	156	187	83	104	171	177	200	272	320	54	127	23	144	154	209	200	131	114	3864
d__Bacteria	k__norank_d__Bacteria	p__Firmicutes	c__Bacilli	o__Bacillales	f__Bacillaceae	g__Bacillus	s__unclassified_g__Bacillus	OTU3728	19	7	12	11	6	7	6	0	3	8	6	7	10	2	8	10	9	7	2	4	1	6	14	9	3	1	3	181
d__Bacteria	k__norank_d__Bacteria	p__Firmicutes	c__Bacilli	o__Bacillales	f__Bacillaceae	g__Bacillus	s__Bacillus_decolorationis	OTU2117	10	13	8	3	6	10	1	2	3	0	6	13	5	5	4	6	4	3	1	6	1	0	7	9	1	4	7	138
d__Bacteria	k__norank_d__Bacteria	p__Proteobacteria	c__Alphaproteobacteria	o__Rhizobiales	f__Rhizobiales_Incertae_Sedis	g__Bauldia	s__metagenome_g__Bauldia	OTU1030	0	1	2	0	0	2	4	0	2	3	4	1	4	3	2	3	1	1	4	4	1	4	4	0	9	1	2	62
d__Bacteria	k__norank_d__Bacteria	p__Proteobacteria	c__Alphaproteobacteria	o__Rhizobiales	f__Rhizobiales_Incertae_Sedis	g__Bauldia	s__unclassified_g__Bauldia	OTU4317	8	12	4	4	2	3	1	2	5	3	12	7	3	10	7	1	3	2	2	6	1	8	6	3	8	13	1	137
d__Bacteria	k__norank_d__Bacteria	p__Proteobacteria	c__Alphaproteobacteria	o__Rhizobiales	f__Rhizobiales_Incertae_Sedis	g__Bauldia	s__unclassified_g__Bauldia	OTU984	0	2	1	1	5	2	0	0	0	1	5	1	0	5	1	1	1	1	2	6	0	4	3	3	2	2	0	49
d__Bacteria	k__norank_d__Bacteria	p__Proteobacteria	c__Alphaproteobacteria	o__Rhizobiales	f__Rhizobiales_Incertae_Sedis	g__Bauldia	s__metagenome_g__Bauldia	OTU1631	4	3	0	0	7	3	0	2	2	0	5	4	2	2	5	1	1	0	2	1	1	5	2	0	5	2	0	59
d__Bacteria	k__norank_d__Bacteria	p__Proteobacteria	c__Alphaproteobacteria	o__Rhizobiales	f__Rhizobiales_Incertae_Sedis	g__Bauldia	s__uncultured_bacterium_g__Bauldia	OTU2825	2	6	2	0	1	0	2	2	0	0	2	2	0	0	4	3	0	0	1	2	0	2	3	2	7	6	3	52
d__Bacteria	k__norank_d__Bacteria	p__Acidobacteria	c__Blastocatellia_Subgroup_4	o__Blastocatellales	f__Blastocatellaceae	g__Blastocatella	s__uncultured_Acidobacteria_bacterium_g__Blastocatella	OTU3307	2	5	1	0	4	1	1	0	0	0	9	4	1	11	0	0	0	0	0	6	1	2	4	3	6	2	0	63
d__Bacteria	k__norank_d__Bacteria	p__Actinobacteria	c__Actinobacteria	o__Frankiales	f__Geodermatophilaceae	g__Blastococcus	s__uncultured_Blastococcus_sp._g__Blastococcus	OTU3225	1	3	1	0	13	1	0	0	0	0	10	10	0	7	2	4	2	4	1	2	0	7	11	4	3	2	1	89
d__Bacteria	k__norank_d__Bacteria	p__Planctomycetes	c__Planctomycetacia	o__Pirellulales	f__Pirellulaceae	g__Blastopirellula	s__unclassified_g__Blastopirellula	OTU380	7	7	6	0	2	3	1	2	7	0	7	3	3	3	5	2	2	1	1	4	0	8	6	6	11	8	3	108
d__Bacteria	k__norank_d__Bacteria	p__Planctomycetes	c__Planctomycetacia	o__Pirellulales	f__Pirellulaceae	g__Blastopirellula	s__metagenome_g__Blastopirellula	OTU2951	3	17	10	2	12	9	4	2	15	15	10	6	2	5	36	8	2	1	7	1	0	6	3	14	17	13	4	224
d__Bacteria	k__norank_d__Bacteria	p__Planctomycetes	c__Planctomycetacia	o__Pirellulales	f__Pirellulaceae	g__Blastopirellula	s__uncultured_Planctomycetaceae_bacterium_g__Blastopirellula	OTU2704	8	32	6	1	14	3	3	1	6	4	12	6	0	15	11	1	5	2	0	12	0	4	13	14	5	9	3	190
d__Bacteria	k__norank_d__Bacteria	p__Planctomycetes	c__Planctomycetacia	o__Pirellulales	f__Pirellulaceae	g__Blastopirellula	s__uncultured_bacterium_g__Blastopirellula	OTU3264	3	7	1	0	4	1	1	0	2	0	3	1	0	5	10	0	1	3	0	6	0	4	5	6	4	7	1	75
d__Bacteria	k__norank_d__Bacteria	p__Proteobacteria	c__Alphaproteobacteria	o__Rhizobiales	f__Beijerinckiaceae	g__Bosea	s__unclassified_g__Bosea	OTU1081	2	1	2	2	14	4	1	0	5	2	8	16	1	2	31	3	0	7	6	1	1	15	12	7	8	2	2	155
d__Bacteria	k__norank_d__Bacteria	p__Actinobacteria	c__Actinobacteria	o__Micrococcales	f__Dermabacteraceae	g__Brachybacterium	s__unclassified_g__Brachybacterium	OTU1635	3	1	1	0	11	6	0	3	1	4	0	5	6	0	4	0	0	1	3	2	2	1	2	1	2	3	2	64
d__Bacteria	k__norank_d__Bacteria	p__Proteobacteria	c__Alphaproteobacteria	o__Rhizobiales	f__Xanthobacteraceae	g__Bradyrhizobium	s__Bradyrhizobium_canariense	OTU2264	18	11	5	6	28	22	13	1	9	5	28	30	37	40	28	25	12	70	8	31	10	49	17	27	63	10	9	612
d__Bacteria	k__norank_d__Bacteria	p__Actinobacteria	c__Actinobacteria	o__Micrococcales	f__Brevibacteriaceae	g__Brevibacterium	s__unclassified_g__Brevibacterium	OTU3227	3	10	7	3	4	11	1	5	3	3	2	2	3	0	5	2	3	3	6	2	0	1	2	8	1	3	1	94
d__Bacteria	k__norank_d__Bacteria	p__Proteobacteria	c__Alphaproteobacteria	o__Caulobacterales	f__Caulobacteraceae	g__Brevundimonas	s__unclassified_g__Brevundimonas	OTU271	0	2	0	1	5	3	1	0	9	13	4	6	6	2	6	3	1	7	3	3	2	1	6	7	4	3	2	100
d__Bacteria	k__norank_d__Bacteria	p__Proteobacteria	c__Alphaproteobacteria	o__Caulobacterales	f__Caulobacteraceae	g__Brevundimonas	s__Brevundimonas_bullata	OTU4067	0	1	0	76	290	92	5	32	99	11	20	49	23	9	28	62	24	23	42	14	7	15	49	33	9	17	0	1030
d__Bacteria	k__norank_d__Bacteria	p__Proteobacteria	c__Alphaproteobacteria	o__Caulobacterales	f__Caulobacteraceae	g__Brevundimonas	s__Brevundimonas_vesicularis	OTU4330	4	0	1	16	34	46	5	4	30	9	1	24	13	1	16	30	9	39	10	4	5	14	29	13	2	4	1	364
d__Bacteria	k__norank_d__Bacteria	p__Proteobacteria	c__Alphaproteobacteria	o__Caulobacterales	f__Caulobacteraceae	g__Brevundimonas	s__Brevundimonas_vesicularis	OTU94	2	2	0	4	12	8	5	2	7	12	1	5	5	1	4	7	0	6	3	2	1	3	3	1	1	1	1	99
d__Bacteria	k__norank_d__Bacteria	p__Proteobacteria	c__Alphaproteobacteria	o__Caulobacterales	f__Caulobacteraceae	g__Brevundimonas	s__Brevundimonas_terrae	OTU2149	5	3	9	127	154	69	10	26	103	22	8	35	53	2	57	81	15	34	41	25	8	13	46	42	1	32	2	1023
d__Bacteria	k__norank_d__Bacteria	p__Firmicutes	c__Bacilli	o__Bacillales	f__Listeriaceae	g__Brochothrix	s__Brochothrix_thermosphacta	OTU4000	22	6	2	0	16	4	0	1	2	0	18	9	5	13	12	25	28	21	0	12	1	14	3	9	24	5	6	258
d__Bacteria	k__norank_d__Bacteria	p__Acidobacteria	c__Acidobacteriia	o__Solibacterales	f__Solibacteraceae_Subgroup_3	g__Bryobacter	s__unclassified_g__Bryobacter	OTU2174	6	3	16	6	4	3	4	6	6	14	6	4	7	4	7	2	1	5	3	3	1	2	1	3	2	12	9	140
d__Bacteria	k__norank_d__Bacteria	p__Acidobacteria	c__Acidobacteriia	o__Solibacterales	f__Solibacteraceae_Subgroup_3	g__Bryobacter	s__uncultured_bacterium_g__Bryobacter	OTU54	4	0	3	1	0	0	14	2	0	1	1	1	4	0	0	1	3	24	4	2	9	3	0	0	5	0	3	85
d__Bacteria	k__norank_d__Bacteria	p__Acidobacteria	c__Acidobacteriia	o__Solibacterales	f__Solibacteraceae_Subgroup_3	g__Bryobacter	s__unclassified_g__Bryobacter	OTU978	0	5	3	0	0	3	1	5	1	3	1	1	1	5	6	2	0	0	1	1	0	1	0	2	1	2	0	45
d__Bacteria	k__norank_d__Bacteria	p__Acidobacteria	c__Acidobacteriia	o__Solibacterales	f__Solibacteraceae_Subgroup_3	g__Bryobacter	s__uncultured_bacterium_g__Bryobacter	OTU2278	1	0	1	3	0	0	4	0	0	3	0	0	1	0	0	1	1	7	6	0	0	2	0	2	0	1	1	34
d__Bacteria	k__norank_d__Bacteria	p__Acidobacteria	c__Acidobacteriia	o__Solibacterales	f__Solibacteraceae_Subgroup_3	g__Bryobacter	s__unclassified_g__Bryobacter	OTU2547	8	2	1	0	11	3	0	5	24	1	15	4	0	10	20	4	1	1	0	3	0	12	3	0	17	7	2	154
d__Bacteria	k__norank_d__Bacteria	p__Acidobacteria	c__Acidobacteriia	o__Solibacterales	f__Solibacteraceae_Subgroup_3	g__Bryobacter	s__uncultured_soil_bacterium_g__Bryobacter	OTU2179	13	6	15	3	6	17	15	11	11	8	8	2	7	4	10	1	2	5	7	4	17	18	5	13	11	13	11	243
d__Bacteria	k__norank_d__Bacteria	p__Acidobacteria	c__Acidobacteriia	o__Solibacterales	f__Solibacteraceae_Subgroup_3	g__Bryobacter	s__unclassified_g__Bryobacter	OTU2532	0	1	0	0	1	2	5	2	3	1	4	0	0	1	8	0	0	1	2	0	2	2	2	1	3	0	1	42
d__Bacteria	k__norank_d__Bacteria	p__Acidobacteria	c__Acidobacteriia	o__Solibacterales	f__Solibacteraceae_Subgroup_3	g__Bryobacter	s__unclassified_g__Bryobacter	OTU2256	0	1	1	0	6	4	1	1	2	6	1	3	5	1	5	1	1	11	8	1	4	8	1	2	7	1	4	86
d__Bacteria	k__norank_d__Bacteria	p__Acidobacteria	c__Acidobacteriia	o__Solibacterales	f__Solibacteraceae_Subgroup_3	g__Bryobacter	s__unclassified_g__Bryobacter	OTU981	12	24	8	1	14	3	0	16	11	6	19	7	1	20	9	0	5	5	3	19	2	3	13	6	7	10	6	230
d__Bacteria	k__norank_d__Bacteria	p__Acidobacteria	c__Acidobacteriia	o__Solibacterales	f__Solibacteraceae_Subgroup_3	g__Bryobacter	s__unclassified_g__Bryobacter	OTU2180	8	16	23	6	2	14	17	11	17	26	5	9	11	2	11	4	4	14	19	6	11	16	7	13	7	12	10	301
d__Bacteria	k__norank_d__Bacteria	p__Acidobacteria	c__Acidobacteriia	o__Solibacterales	f__Solibacteraceae_Subgroup_3	g__Bryobacter	s__metagenome_g__Bryobacter	OTU2222	5	3	4	2	6	6	1	4	4	5	3	4	1	12	3	0	2	4	2	6	0	2	4	4	2	4	4	97
d__Bacteria	k__norank_d__Bacteria	p__Acidobacteria	c__Acidobacteriia	o__Solibacterales	f__Solibacteraceae_Subgroup_3	g__Bryobacter	s__uncultured_Acidobacteria_bacterium_g__Bryobacter	OTU67	9	1	4	3	0	7	83	2	3	11	0	9	23	0	1	2	3	16	35	13	47	11	3	4	4	0	16	310
d__Bacteria	k__norank_d__Bacteria	p__Acidobacteria	c__Acidobacteriia	o__Solibacterales	f__Solibacteraceae_Subgroup_3	g__Bryobacter	s__uncultured_Acidobacteria_bacterium_g__Bryobacter	OTU2654	0	0	3	5	0	2	34	0	0	5	0	0	12	0	0	0	0	14	11	0	15	7	0	0	9	1	3	121
d__Bacteria	k__norank_d__Bacteria	p__Acidobacteria	c__Acidobacteriia	o__Solibacterales	f__Solibacteraceae_Subgroup_3	g__Bryobacter	s__uncultured_soil_bacterium_g__Bryobacter	OTU109	4	9	3	5	2	3	1	10	12	6	2	3	2	3	8	5	2	1	7	3	0	4	2	3	3	3	5	111
d__Bacteria	k__norank_d__Bacteria	p__Acidobacteria	c__Acidobacteriia	o__Solibacterales	f__Solibacteraceae_Subgroup_3	g__Bryobacter	s__unclassified_g__Bryobacter	OTU1516	5	2	3	2	3	6	0	9	7	2	4	2	1	2	4	0	2	0	1	1	3	3	1	3	0	0	7	73
d__Bacteria	k__norank_d__Bacteria	p__Acidobacteria	c__Acidobacteriia	o__Solibacterales	f__Solibacteraceae_Subgroup_3	g__Bryobacter	s__unclassified_g__Bryobacter	OTU2641	8	3	3	1	4	10	3	22	12	6	4	3	1	1	4	1	3	3	5	2	1	0	3	6	1	5	10	125
d__Bacteria	k__norank_d__Bacteria	p__Acidobacteria	c__Acidobacteriia	o__Solibacterales	f__Solibacteraceae_Subgroup_3	g__Bryobacter	s__unclassified_g__Bryobacter	OTU2657	4	2	6	1	0	7	25	1	3	11	2	0	7	2	4	5	10	9	20	0	20	41	3	1	24	1	10	219
d__Bacteria	k__norank_d__Bacteria	p__Acidobacteria	c__Acidobacteriia	o__Solibacterales	f__Solibacteraceae_Subgroup_3	g__Bryobacter	s__unclassified_g__Bryobacter	OTU1071	0	1	3	2	2	0	1	2	3	0	1	0	1	1	7	1	1	1	1	0	0	1	3	3	3	3	0	41
d__Bacteria	k__norank_d__Bacteria	p__Acidobacteria	c__Acidobacteriia	o__Solibacterales	f__Solibacteraceae_Subgroup_3	g__Bryobacter	s__unclassified_g__Bryobacter	OTU1494	0	1	2	2	1	2	13	2	1	2	1	0	5	2	1	0	0	3	6	0	7	4	1	1	7	2	3	69
d__Bacteria	k__norank_d__Bacteria	p__Acidobacteria	c__Acidobacteriia	o__Solibacterales	f__Solibacteraceae_Subgroup_3	g__Bryobacter	s__unclassified_g__Bryobacter	OTU1256	0	1	0	1	1	4	3	0	4	6	1	0	3	0	1	3	0	4	7	0	2	2	0	3	4	0	2	52
d__Bacteria	k__norank_d__Bacteria	p__Acidobacteria	c__Acidobacteriia	o__Solibacterales	f__Solibacteraceae_Subgroup_3	g__Bryobacter	s__Acidobacteriaceae_bacterium_KBS_96	OTU2638	26	3	17	4	3	113	118	28	15	26	1	83	56	10	0	3	1	64	34	199	108	16	6	6	9	26	31	1006
d__Bacteria	k__norank_d__Bacteria	p__Proteobacteria	c__Gammaproteobacteria	o__Betaproteobacteriales	f__Burkholderiaceae	g__Burkholderia-Caballeronia-Paraburkholderia	s__Paraburkholderia_soli	OTU1479	11	5	42	4	2	256	36	9	8	5	8	3	3	41	4	1	1	27	14	10	42	20	10	2	15	7	18	604
d__Bacteria	k__norank_d__Bacteria	p__Actinobacteria	c__Actinobacteria	o__Microtrichales	f__Ilumatobacteraceae	g__CL500-29_marine_group	s__metagenome_g__CL500-29_marine_group	OTU4359	1	1	0	0	0	5	2	0	2	3	3	2	2	1	1	2	1	4	2	4	2	6	6	1	12	1	0	64
d__Bacteria	k__norank_d__Bacteria	p__Proteobacteria	c__Alphaproteobacteria	o__Tistrellales	f__Geminicoccaceae	g__Candidatus_Alysiosphaera	s__uncultured_bacterium_g__Candidatus_Alysiosphaera	OTU991	4	2	2	0	4	0	1	1	0	0	4	1	1	5	1	2	0	2	0	0	1	1	3	1	5	3	1	45
d__Bacteria	k__norank_d__Bacteria	p__Proteobacteria	c__Gammaproteobacteria	o__Gammaproteobacteria_Incertae_Sedis	f__unclassified_o__Gammaproteobacteria_Incertae_Sedis	g__Candidatus_Berkiella	s__uncultured_bacterium_g__Candidatus_Berkiella	OTU397	0	1	0	0	0	1	1	0	1	0	6	2	2	4	8	0	0	1	0	1	0	1	2	1	5	0	1	38
d__Bacteria	k__norank_d__Bacteria	p__Proteobacteria	c__Gammaproteobacteria	o__Gammaproteobacteria_Incertae_Sedis	f__unclassified_o__Gammaproteobacteria_Incertae_Sedis	g__Candidatus_Berkiella	s__unclassified_g__Candidatus_Berkiella	OTU202	0	18	0	0	8	1	0	4	16	3	7	9	4	6	11	2	3	0	0	3	0	0	6	4	11	9	1	126
d__Bacteria	k__norank_d__Bacteria	p__Proteobacteria	c__Gammaproteobacteria	o__Gammaproteobacteria_Incertae_Sedis	f__unclassified_o__Gammaproteobacteria_Incertae_Sedis	g__Candidatus_Berkiella	s__uncultured_bacterium_g__Candidatus_Berkiella	OTU3211	13	4	6	2	3	3	2	2	1	8	5	1	8	25	20	2	0	32	7	8	6	35	15	10	37	14	24	293
d__Bacteria	k__norank_d__Bacteria	p__Proteobacteria	c__Gammaproteobacteria	o__Gammaproteobacteria_Incertae_Sedis	f__unclassified_o__Gammaproteobacteria_Incertae_Sedis	g__Candidatus_Berkiella	s__uncultured_bacterium_g__Candidatus_Berkiella	OTU3022	7	3	6	1	0	0	1	0	1	3	4	5	2	2	4	0	4	4	2	2	0	6	6	4	7	2	2	78
d__Bacteria	k__norank_d__Bacteria	p__Acidobacteria	c__Acidobacteriia	o__Acidobacteriales	f__Koribacteraceae	g__Candidatus_Koribacter	s__uncultured_Acidobacteria_bacterium_g__Candidatus_Koribacter	OTU2749	7	6	103	18	2	20	68	12	9	32	5	13	17	2	9	3	7	93	44	14	34	23	7	5	18	5	7	583
d__Bacteria	k__norank_d__Bacteria	p__Acidobacteria	c__Acidobacteriia	o__Acidobacteriales	f__Koribacteraceae	g__Candidatus_Koribacter	s__uncultured_Acidobacteriaceae_bacterium_g__Candidatus_Koribacter	OTU3087	18	47	55	16	20	22	16	30	23	28	28	14	26	15	20	4	5	19	27	20	11	12	17	23	14	16	17	563
d__Bacteria	k__norank_d__Bacteria	p__Proteobacteria	c__Alphaproteobacteria	o__Caedibacterales	f__Caedibacteraceae	g__Candidatus_Nucleicultrix	s__unclassified_g__Candidatus_Nucleicultrix	OTU817	0	0	0	0	1	0	2	2	6	0	9	15	6	6	16	1	0	2	23	13	0	15	13	4	5	6	4	149
d__Bacteria	k__norank_d__Bacteria	p__Omnitrophicaeota	c__Omnitrophia	o__Omnitrophales	f__Omnitrophaceae	g__Candidatus_Omnitrophus	s__unclassified_g__Candidatus_Omnitrophus	OTU1889	4	17	1	0	2	0	1	1	0	1	0	1	0	2	0	1	5	1	1	1	0	0	0	0	0	0	0	39
d__Bacteria	k__norank_d__Bacteria	p__Proteobacteria	c__Gammaproteobacteria	o__Gammaproteobacteria_Incertae_Sedis	f__unclassified_o__Gammaproteobacteria_Incertae_Sedis	g__Candidatus_Ovatusbacter	s__unclassified_g__Candidatus_Ovatusbacter	OTU1403	0	0	0	0	3	2	3	5	12	11	3	3	1	2	1	0	0	1	17	6	0	5	7	7	0	1	3	93
d__Bacteria	k__norank_d__Bacteria	p__Proteobacteria	c__Gammaproteobacteria	o__Gammaproteobacteria_Incertae_Sedis	f__unclassified_o__Gammaproteobacteria_Incertae_Sedis	g__Candidatus_Ovatusbacter	s__unclassified_g__Candidatus_Ovatusbacter	OTU3098	8	2	5	0	0	1	1	1	0	4	0	0	1	4	0	0	0	0	0	4	0	0	1	0	3	4	0	39
d__Bacteria	k__norank_d__Bacteria	p__Proteobacteria	c__Gammaproteobacteria	o__Gammaproteobacteria_Incertae_Sedis	f__unclassified_o__Gammaproteobacteria_Incertae_Sedis	g__Candidatus_Ovatusbacter	s__uncultured_bacterium_g__Candidatus_Ovatusbacter	OTU900	6	5	0	2	12	2	0	5	4	4	65	35	8	184	42	2	1	0	2	31	1	13	58	10	25	123	13	653
d__Bacteria	k__norank_d__Bacteria	p__Proteobacteria	c__Gammaproteobacteria	o__Gammaproteobacteria_Incertae_Sedis	f__unclassified_o__Gammaproteobacteria_Incertae_Sedis	g__Candidatus_Ovatusbacter	s__unclassified_g__Candidatus_Ovatusbacter	OTU2897	12	6	9	0	0	0	2	0	0	3	1	1	4	4	1	0	0	2	0	1	0	5	2	2	1	1	2	59
d__Bacteria	k__norank_d__Bacteria	p__Proteobacteria	c__Gammaproteobacteria	o__Gammaproteobacteria_Incertae_Sedis	f__unclassified_o__Gammaproteobacteria_Incertae_Sedis	g__Candidatus_Ovatusbacter	s__unclassified_g__Candidatus_Ovatusbacter	OTU2266	6	12	18	1	0	5	0	2	3	1	3	0	2	4	4	0	0	1	2	0	2	1	1	2	5	0	2	77
d__Bacteria	k__norank_d__Bacteria	p__Proteobacteria	c__Alphaproteobacteria	o__Paracaedibacterales	f__Paracaedibacteraceae	g__Candidatus_Paracaedibacter	s__metagenome_g__Candidatus_Paracaedibacter	OTU1249	1	2	0	5	2	5	3	16	5	5	2	4	5	0	10	10	0	1	13	4	3	3	5	5	1	2	7	119
d__Bacteria	k__norank_d__Bacteria	p__Acidobacteria	c__Acidobacteriia	o__Solibacterales	f__Solibacteraceae_Subgroup_3	g__Candidatus_Solibacter	s__unclassified_g__Candidatus_Solibacter	OTU1131	2	3	1	1	1	3	2	0	3	4	1	2	3	1	3	0	2	13	6	1	8	16	0	2	12	3	2	95
d__Bacteria	k__norank_d__Bacteria	p__Acidobacteria	c__Acidobacteriia	o__Solibacterales	f__Solibacteraceae_Subgroup_3	g__Candidatus_Solibacter	s__uncultured_Solibacter_sp.	OTU2610	5	0	4	2	5	3	2	1	2	1	3	1	5	1	6	1	0	0	2	1	1	3	3	7	7	3	0	69
d__Bacteria	k__norank_d__Bacteria	p__Acidobacteria	c__Acidobacteriia	o__Solibacterales	f__Solibacteraceae_Subgroup_3	g__Candidatus_Solibacter	s__uncultured_bacterium_g__Candidatus_Solibacter	OTU985	5	8	8	5	5	8	4	2	13	13	8	3	4	9	7	8	3	4	19	10	6	7	5	12	5	7	9	197
d__Bacteria	k__norank_d__Bacteria	p__Acidobacteria	c__Acidobacteriia	o__Solibacterales	f__Solibacteraceae_Subgroup_3	g__Candidatus_Solibacter	s__uncultured_bacterium_g__Candidatus_Solibacter	OTU2795	1	0	1	1	0	0	2	0	1	1	0	0	4	0	0	0	0	4	1	0	2	4	0	1	6	0	0	29
d__Bacteria	k__norank_d__Bacteria	p__Proteobacteria	c__Gammaproteobacteria	o__Betaproteobacteriales	f__Burkholderiaceae	g__Candidimonas	s__uncultured_bacterium_g__Candidimonas	OTU76	6	3	5	2	3	16	21	1	8	2	6	10	2	4	1	1	1	18	7	3	39	21	5	5	1	2	14	207
d__Bacteria	k__norank_d__Bacteria	p__Proteobacteria	c__Gammaproteobacteria	o__Betaproteobacteriales	f__Burkholderiaceae	g__Castellaniella	s__unclassified_g__Castellaniella	OTU75	113	91	128	38	124	141	531	178	57	75	130	243	53	58	14	46	13	122	175	251	614	61	53	71	29	122	214	3745
d__Bacteria	k__norank_d__Bacteria	p__Proteobacteria	c__Alphaproteobacteria	o__Caulobacterales	f__Caulobacteraceae	g__Caulobacter	s__Caulobacter_sp._g__Caulobacter	OTU97	2	0	0	0	2	3	6	4	9	1	0	9	2	4	2	2	6	15	5	0	3	0	8	1	0	3	0	87
d__Bacteria	k__norank_d__Bacteria	p__Proteobacteria	c__Alphaproteobacteria	o__Caulobacterales	f__Caulobacteraceae	g__Caulobacter	s__unclassified_g__Caulobacter	OTU1540	2	1	2	0	2	3	0	2	1	0	1	8	1	3	4	1	0	0	1	4	1	1	3	1	1	7	0	50
d__Bacteria	k__norank_d__Bacteria	p__Actinobacteria	c__Actinobacteria	o__Micrococcales	f__Promicromonosporaceae	g__Cellulosimicrobium	s__Cellulosimicrobium_cellulans_g__Cellulosimicrobium	OTU462	7	0	1	7	11	11	0	2	1	2	11	8	7	5	8	11	1	11	2	4	0	4	8	11	4	3	3	143
d__Bacteria	k__norank_d__Bacteria	p__Proteobacteria	c__Gammaproteobacteria	o__Cellvibrionales	f__Cellvibrionaceae	g__Cellvibrio	s__uncultured_bacterium_g__Cellvibrio	OTU3811	28	2	17	116	211	25	6	4	33	2	11	17	10	0	6	84	6	7	9	39	5	6	37	29	1	62	1	774
d__Bacteria	k__norank_d__Bacteria	p__Proteobacteria	c__Gammaproteobacteria	o__Cellvibrionales	f__Cellvibrionaceae	g__Cellvibrio	s__unclassified_g__Cellvibrio	OTU4109	0	0	0	0	0	3	2	1	0	4	2	1	1	0	0	7	0	8	3	0	4	2	2	10	1	1	1	53
d__Bacteria	k__norank_d__Bacteria	p__Proteobacteria	c__Gammaproteobacteria	o__Cellvibrionales	f__Cellvibrionaceae	g__Cellvibrio	s__metagenome_g__Cellvibrio	OTU201	11	7	7	97	153	104	28	54	28	19	29	90	37	23	41	52	13	58	58	49	16	66	195	81	20	68	25	1429
d__Bacteria	k__norank_d__Bacteria	p__Proteobacteria	c__Gammaproteobacteria	o__Cellvibrionales	f__Cellvibrionaceae	g__Cellvibrio	s__unclassified_g__Cellvibrio	OTU3853	0	3	1	21	26	4	0	4	2	1	5	5	2	2	8	6	0	4	1	3	0	2	2	6	0	5	1	114
d__Bacteria	k__norank_d__Bacteria	p__Proteobacteria	c__Gammaproteobacteria	o__Xanthomonadales	f__Rhodanobacteraceae	g__Chiayiivirga	s__uncultured_bacterium_g__Chiayiivirga	OTU3483	9	6	4	11	2	1	2	4	8	8	3	2	4	0	3	1	0	0	3	6	1	1	6	10	1	16	2	114
d__Bacteria	k__norank_d__Bacteria	p__Bacteroidetes	c__Bacteroidia	o__Chitinophagales	f__Chitinophagaceae	g__Chitinophaga	s__Chitinophaga_arvensicola	OTU1521	0	0	0	0	1	6	2	1	0	0	0	6	0	0	0	12	0	0	1	0	1	5	0	0	4	0	0	39
d__Bacteria	k__norank_d__Bacteria	p__Bacteroidetes	c__Bacteroidia	o__Chitinophagales	f__Chitinophagaceae	g__Chitinophaga	s__unclassified_g__Chitinophaga	OTU2373	7	45	8	104	14	29	32	22	22	24	8	37	8	23	18	13	8	11	26	30	19	31	26	60	33	38	10	706
d__Bacteria	k__norank_d__Bacteria	p__Bacteroidetes	c__Bacteroidia	o__Flavobacteriales	f__Weeksellaceae	g__Chryseobacterium	s__unclassified_g__Chryseobacterium	OTU1554	2	1	2	21	14	36	5	7	38	3	2	14	8	4	7	30	15	27	8	8	5	0	137	6	3	3	2	408
d__Bacteria	k__norank_d__Bacteria	p__Bacteroidetes	c__Bacteroidia	o__Flavobacteriales	f__Weeksellaceae	g__Chryseobacterium	s__unclassified_g__Chryseobacterium	OTU1567	6	0	1	12	5	14	6	14	17	0	1	5	2	1	0	5	4	13	3	1	10	1	10	1	1	3	0	136
d__Bacteria	k__norank_d__Bacteria	p__Bacteroidetes	c__Bacteroidia	o__Flavobacteriales	f__Weeksellaceae	g__Chryseobacterium	s__Chryseobacterium_lactis_g__Chryseobacterium	OTU645	0	0	0	1	4	4	0	1	1	1	1	37	0	3	7	6	2	2	2	2	3	1	1	3	2	1	2	87
d__Bacteria	k__norank_d__Bacteria	p__Bacteroidetes	c__Bacteroidia	o__Cytophagales	f__Microscillaceae	g__Chryseolinea	s__unclassified_g__Chryseolinea	OTU1688	4	6	3	0	0	0	0	1	0	0	0	0	0	1	2	0	1	0	0	1	0	0	2	2	0	1	1	25
d__Bacteria	k__norank_d__Bacteria	p__Bacteroidetes	c__Bacteroidia	o__Cytophagales	f__Microscillaceae	g__Chryseolinea	s__uncultured_Bacteroidetes_bacterium_g__Chryseolinea	OTU1416	5	8	2	0	1	0	0	1	4	1	1	2	2	4	2	0	0	0	0	3	0	0	3	4	0	4	3	50
d__Bacteria	k__norank_d__Bacteria	p__Bacteroidetes	c__Bacteroidia	o__Cytophagales	f__Microscillaceae	g__Chryseolinea	s__uncultured_bacterium_g__Chryseolinea	OTU2446	35	148	18	6	2	1	3	9	15	16	13	5	20	8	16	1	6	2	0	8	0	1	2	17	1	12	12	377
d__Bacteria	k__norank_d__Bacteria	p__Proteobacteria	c__Gammaproteobacteria	o__Xanthomonadales	f__Rhodanobacteraceae	g__Chujaibacter	s__unclassified_g__Chujaibacter	OTU2947	338	104	367	58	59	286	2212	337	49	318	41	95	434	59	42	42	35	348	225	353	1713	148	73	140	32	149	1150	9207
d__Bacteria	k__norank_d__Bacteria	p__Firmicutes	c__Clostridia	o__Clostridiales	f__Clostridiaceae_1	g__Clostridium_sensu_stricto_1	s__metagenome_g__Clostridium_sensu_stricto_1	OTU3778	11	24	2	1	3	5	3	0	1	1	12	6	1	6	6	6	3	8	1	11	0	7	3	3	9	4	0	137
d__Bacteria	k__norank_d__Bacteria	p__Firmicutes	c__Clostridia	o__Clostridiales	f__Clostridiaceae_1	g__Clostridium_sensu_stricto_1	s__unclassified_g__Clostridium_sensu_stricto_1	OTU3692	2	2	2	0	2	6	1	0	3	0	3	4	1	1	3	4	7	4	0	1	0	4	1	8	5	2	1	67
d__Bacteria	k__norank_d__Bacteria	p__Firmicutes	c__Clostridia	o__Clostridiales	f__Clostridiaceae_1	g__Clostridium_sensu_stricto_12	s__unclassified_g__Clostridium_sensu_stricto_12	OTU875	1	0	1	1	1	1	2	0	2	1	3	2	6	5	4	2	6	4	3	2	2	1	4	1	4	5	1	65
d__Bacteria	k__norank_d__Bacteria	p__Firmicutes	c__Clostridia	o__Clostridiales	f__Clostridiaceae_1	g__Clostridium_sensu_stricto_8	s__uncultured_bacterium_g__Clostridium_sensu_stricto_8	OTU1465	1	1	2	0	1	4	1	1	0	1	0	5	3	3	6	3	8	2	2	1	5	0	5	3	1	4	0	63
d__Bacteria	k__norank_d__Bacteria	p__Firmicutes	c__Bacilli	o__Bacillales	f__Paenibacillaceae	g__Cohnella	s__unclassified_g__Cohnella	OTU4335	4	4	2	0	4	1	2	0	2	3	2	2	0	1	3	2	7	3	1	1	5	1	3	1	2	2	0	58
d__Bacteria	k__norank_d__Bacteria	p__Actinobacteria	c__Actinobacteria	o__Solirubrobacterales	f__Solirubrobacteraceae	g__Conexibacter	s__unclassified_g__Conexibacter	OTU3069	2	3	1	2	7	5	3	2	1	1	7	8	8	1	4	6	4	9	6	5	3	4	7	3	6	1	4	113
d__Bacteria	k__norank_d__Bacteria	p__Actinobacteria	c__Actinobacteria	o__Solirubrobacterales	f__Solirubrobacteraceae	g__Conexibacter	s__metagenome_g__Conexibacter	OTU2926	2	1	0	0	2	2	1	0	0	1	7	12	0	2	0	7	2	18	3	10	1	8	4	0	6	3	3	95
d__Bacteria	k__norank_d__Bacteria	p__Proteobacteria	c__Gammaproteobacteria	o__Coxiellales	f__Coxiellaceae	g__Coxiella	s__unclassified_g__Coxiella	OTU1341	7	5	2	1	8	0	0	0	0	1	3	3	1	2	1	1	1	1	0	4	0	1	0	3	8	2	0	55
d__Bacteria	k__norank_d__Bacteria	p__Proteobacteria	c__Alphaproteobacteria	o__Sphingomonadales	f__Sphingomonadaceae	g__Croceicoccus	s__Croceicoccus_naphthovorans	OTU1364	1	2	0	1	15	0	1	0	1	1	2	9	0	6	1	3	3	3	0	7	0	6	2	4	7	2	0	77
d__Bacteria	k__norank_d__Bacteria	p__Bacteroidetes	c__Bacteroidia	o__Flavobacteriales	f__Crocinitomicaceae	g__Crocinitomix	s__unclassified_g__Crocinitomix	OTU4488	2	6	5	0	5	1	0	1	10	11	10	0	0	5	9	2	5	0	2	2	0	0	2	6	3	2	4	93
d__Bacteria	k__norank_d__Bacteria	p__Bacteroidetes	c__Bacteroidia	o__Flavobacteriales	f__Crocinitomicaceae	g__Crocinitomix	s__uncultured_bacterium_g__Crocinitomix	OTU576	2	3	5	0	2	0	0	3	4	2	11	0	0	2	1	0	0	0	0	3	0	2	2	2	2	0	2	48
d__Bacteria	k__norank_d__Bacteria	p__Bacteroidetes	c__Bacteroidia	o__Flavobacteriales	f__Crocinitomicaceae	g__Crocinitomix	s__uncultured_bacterium_g__Crocinitomix	OTU690	0	1	0	0	0	0	0	12	0	0	0	5	0	7	0	1	0	0	0	2	0	0	16	0	2	8	0	54
d__Bacteria	k__norank_d__Bacteria	p__Proteobacteria	c__Gammaproteobacteria	o__Betaproteobacteriales	f__Burkholderiaceae	g__Cupriavidus	s__unclassified_g__Cupriavidus	OTU2156	17	9	26	15	15	29	23	14	27	13	31	22	11	20	35	5	2	16	21	4	16	29	11	16	20	16	16	479
d__Bacteria	k__norank_d__Bacteria	p__Bacteroidetes	c__Bacteroidia	o__Cytophagales	f__Cytophagaceae	g__Cytophaga	s__Cytophaga_aurantiaca	OTU2503	0	0	0	0	0	0	3	5	1	0	1	1	0	0	0	1	0	5	11	1	4	6	1	5	3	2	0	50
d__Bacteria	k__norank_d__Bacteria	p__Bacteroidetes	c__Bacteroidia	o__Cytophagales	f__Cytophagaceae	g__Cytophaga	s__Hypsibius_dujardini_g__Cytophaga	OTU347	0	3	1	1	0	0	0	1	0	0	4	2	0	20	3	0	0	0	1	0	0	0	3	0	2	2	2	45
d__Bacteria	k__norank_d__Bacteria	p__Proteobacteria	c__Alphaproteobacteria	o__Rhodospirillales	f__Rhodopirillaceae	g__Defluviicoccus	s__uncultured_bacterium_g__Defluviicoccus	OTU1055	6	3	0	0	12	2	0	0	1	0	9	9	1	17	3	5	17	2	0	0	1	2	3	4	2	1	1	101
d__Bacteria	k__norank_d__Bacteria	p__Proteobacteria	c__Alphaproteobacteria	o__Rhodospirillales	f__Rhodopirillaceae	g__Defluviicoccus	s__uncultured_Defluviicoccus_sp.	OTU4460	6	9	1	0	11	2	0	0	1	0	11	6	3	12	2	7	21	1	2	2	0	5	4	7	10	2	2	127
d__Bacteria	k__norank_d__Bacteria	p__Proteobacteria	c__Alphaproteobacteria	o__Rhodospirillales	f__Rhodopirillaceae	g__Defluviicoccus	s__uncultured_Defluviicoccus_sp.	OTU1471	1	0	1	1	0	3	0	0	2	0	9	3	3	5	7	0	7	1	1	2	0	8	3	4	4	5	1	71
d__Bacteria	k__norank_d__Bacteria	p__Proteobacteria	c__Alphaproteobacteria	o__Rhodospirillales	f__Rhodopirillaceae	g__Defluviicoccus	s__uncultured_Defluviicoccus_sp.	OTU3704	1	4	0	0	5	1	0	0	0	1	2	3	1	6	2	7	8	1	0	3	0	4	0	3	1	1	2	56
d__Bacteria	k__norank_d__Bacteria	p__Proteobacteria	c__Alphaproteobacteria	o__Rhodospirillales	f__Rhodopirillaceae	g__Defluviicoccus	s__metagenome_g__Defluviicoccus	OTU1502	2	1	0	0	6	1	0	0	0	0	4	4	0	8	0	2	3	2	0	1	0	0	1	1	1	1	0	38
d__Bacteria	k__norank_d__Bacteria	p__Proteobacteria	c__Alphaproteobacteria	o__Rhodobacterales	f__Rhodobacteraceae	g__Defluviimonas	s__uncultured_bacterium_g__Defluviimonas	OTU987	6	10	5	2	53	6	1	1	5	6	34	30	6	20	32	9	2	10	7	12	1	15	25	43	23	18	2	384
d__Bacteria	k__norank_d__Bacteria	p__Proteobacteria	c__Gammaproteobacteria	o__Betaproteobacteriales	f__Burkholderiaceae	g__Delftia	s__unclassified_g__Delftia	OTU2166	75	10	331	21	29	108	24	67	64	39	27	19	17	16	9	24	4	61	39	23	14	9	36	42	6	23	5	1142
d__Bacteria	k__norank_d__Bacteria	p__Proteobacteria	c__Deltaproteobacteria	o__Desulfuromonadales	f__Desulfuromonadaceae	g__Desulfuromonas	s__unclassified_g__Desulfuromonas	OTU1657	7	0	0	0	1	0	0	0	1	1	0	0	1	0	1	30	27	0	0	4	0	1	0	0	0	0	0	74
d__Bacteria	k__norank_d__Bacteria	p__Proteobacteria	c__Alphaproteobacteria	o__Rhizobiales	f__Devosiaceae	g__Devosia	s__metagenome_g__Devosia	OTU1255	4	4	8	3	16	3	0	0	1	2	3	4	5	1	3	0	0	2	1	6	0	2	4	7	4	2	0	85
d__Bacteria	k__norank_d__Bacteria	p__Proteobacteria	c__Alphaproteobacteria	o__Rhizobiales	f__Devosiaceae	g__Devosia	s__Devosia_riboflavina	OTU1245	4	7	2	18	144	34	10	4	8	2	30	50	13	7	19	42	12	17	6	13	3	15	41	39	11	7	5	563
d__Bacteria	k__norank_d__Bacteria	p__Bacteroidetes	c__Bacteroidia	o__Chitinophagales	f__Chitinophagaceae	g__Dinghuibacter	s__unclassified_g__Dinghuibacter	OTU4511	1	1	0	0	0	1	0	2	8	6	0	1	2	0	7	0	1	2	0	1	0	2	0	1	1	1	2	40
d__Bacteria	k__norank_d__Bacteria	p__Verrucomicrobia	c__Verrucomicrobiae	o__Opitutales	f__Opitutaceae	g__Diplosphaera	s__uncultured_Opitutus_sp._g__Diplosphaera	OTU2694	7	13	3	0	4	2	1	1	1	0	9	1	2	12	1	2	1	2	0	5	3	10	7	1	3	2	1	94
d__Bacteria	k__norank_d__Bacteria	p__Proteobacteria	c__Gammaproteobacteria	o__Xanthomonadales	f__Rhodanobacteraceae	g__Dokdonella	s__uncultured_Dokdonella_sp._g__Dokdonella	OTU2725	2	3	37	52	7	11	57	5	20	66	7	4	35	7	18	4	2	41	46	5	30	30	14	16	40	18	16	593
d__Bacteria	k__norank_d__Bacteria	p__Proteobacteria	c__Gammaproteobacteria	o__Xanthomonadales	f__Rhodanobacteraceae	g__Dokdonella	s__unclassified_g__Dokdonella	OTU2980	37	46	36	8	17	17	27	101	36	48	36	35	33	72	36	3	2	1	23	33	14	14	67	39	16	103	38	938
d__Bacteria	k__norank_d__Bacteria	p__Proteobacteria	c__Alphaproteobacteria	o__Dongiales	f__Dongiaceae	g__Dongia	s__unclassified_g__Dongia	OTU3763	1	1	0	0	1	0	1	0	1	0	1	4	0	1	6	0	0	0	0	2	0	11	0	1	6	0	0	37
d__Bacteria	k__norank_d__Bacteria	p__Proteobacteria	c__Alphaproteobacteria	o__Dongiales	f__Dongiaceae	g__Dongia	s__unclassified_g__Dongia	OTU1822	102	38	144	30	41	99	72	16	17	37	41	79	99	123	45	33	21	307	73	196	53	163	45	53	177	90	48	2242
d__Bacteria	k__norank_d__Bacteria	p__Proteobacteria	c__Alphaproteobacteria	o__Dongiales	f__Dongiaceae	g__Dongia	s__unclassified_g__Dongia	OTU71	4	3	2	3	3	3	4	0	1	1	5	1	8	6	2	2	1	17	3	2	5	15	2	3	18	4	2	120
d__Bacteria	k__norank_d__Bacteria	p__Proteobacteria	c__Alphaproteobacteria	o__Dongiales	f__Dongiaceae	g__Dongia	s__unclassified_g__Dongia	OTU1242	1	2	0	1	0	0	1	0	0	1	0	1	4	1	0	1	0	8	0	1	0	1	0	1	5	0	1	30
d__Bacteria	k__norank_d__Bacteria	p__Proteobacteria	c__Alphaproteobacteria	o__Dongiales	f__Dongiaceae	g__Dongia	s__uncultured_bacterium_g__Dongia	OTU583	140	126	118	31	82	96	67	38	36	61	98	141	104	168	70	61	27	217	63	180	46	214	74	80	249	104	64	2755
d__Bacteria	k__norank_d__Bacteria	p__Bacteroidetes	c__Bacteroidia	o__Cytophagales	f__Spirosomaceae	g__Dyadobacter	s__Dyadobacter_fermentans_DSM_18053	OTU1604	0	0	0	10	1	9	0	17	18	3	4	1	1	0	27	0	1	2	16	2	2	6	10	6	3	2	3	144
d__Bacteria	k__norank_d__Bacteria	p__Bacteroidetes	c__Bacteroidia	o__Cytophagales	f__Spirosomaceae	g__Dyadobacter	s__unclassified_g__Dyadobacter	OTU1093	0	0	1	30	13	21	0	12	9	3	3	15	2	2	24	12	0	3	15	2	4	6	14	12	9	5	2	219
d__Bacteria	k__norank_d__Bacteria	p__Proteobacteria	c__Gammaproteobacteria	o__Betaproteobacteriales	f__Nitrosomonadaceae	g__Ellin6067	s__unclassified_g__Ellin6067	OTU1305	10	21	6	6	42	12	2	8	22	7	55	35	6	16	23	7	15	15	8	18	2	31	17	16	37	9	6	452
d__Bacteria	k__norank_d__Bacteria	p__Proteobacteria	c__Gammaproteobacteria	o__Betaproteobacteriales	f__Nitrosomonadaceae	g__Ellin6067	s__unclassified_g__Ellin6067	OTU3807	52	31	61	23	35	68	79	13	32	25	45	88	24	63	13	17	15	248	64	85	62	110	16	56	72	28	29	1454
d__Bacteria	k__norank_d__Bacteria	p__Proteobacteria	c__Gammaproteobacteria	o__Pseudomonadales	f__Moraxellaceae	g__Enhydrobacter	s__Moraxella_osloensis_g__Enhydrobacter	OTU3338	8	9	9	0	4	3	2	1	2	1	3	2	4	3	4	16	9	9	1	4	1	5	1	7	8	9	2	127
d__Bacteria	k__norank_d__Bacteria	p__Proteobacteria	c__Alphaproteobacteria	o__Rhizobiales	f__Rhizobiaceae	g__Ensifer	s__Ensifer_adhaerens_g__Ensifer	OTU579	22	11	5	9	65	40	9	8	14	10	74	104	11	27	82	16	12	47	14	16	5	51	53	46	66	16	14	847
d__Bacteria	k__norank_d__Bacteria	p__Proteobacteria	c__Alphaproteobacteria	o__Rhizobiales	f__Rhizobiaceae	g__Ensifer	s__unclassified_g__Ensifer	OTU2617	7	6	1	4	14	5	1	0	5	3	23	17	0	7	22	2	2	9	3	4	1	3	14	21	15	6	2	197
d__Bacteria	k__norank_d__Bacteria	p__Proteobacteria	c__Gammaproteobacteria	o__Betaproteobacteriales	f__Burkholderiaceae	g__Eoetvoesia	s__uncultured_bacterium_g__Eoetvoesia	OTU460	2	1	2	2	5	7	3	2	1	1	11	7	2	4	16	3	0	0	2	5	1	1	2	3	4	0	1	88
d__Bacteria	k__norank_d__Bacteria	p__Proteobacteria	c__Gammaproteobacteria	o__Betaproteobacteriales	f__Burkholderiaceae	g__Eoetvoesia	s__uncultured_beta_proteobacterium_g__Eoetvoesia	OTU2442	2	1	0	1	1	4	10	1	1	0	2	2	0	0	0	2	0	7	1	2	12	0	2	0	1	0	6	58
d__Bacteria	k__norank_d__Bacteria	p__Proteobacteria	c__Alphaproteobacteria	o__Sphingomonadales	f__Sphingomonadaceae	g__Erythrobacter	s__unclassified_g__Erythrobacter	OTU1599	40	22	4	3	29	10	5	0	2	1	13	22	4	11	10	15	5	10	2	4	0	12	14	15	8	2	4	267
d__Bacteria	k__norank_d__Bacteria	p__Proteobacteria	c__Alphaproteobacteria	o__Sneathiellales	f__Sneathiellaceae	g__Ferrovibrio	s__uncultured_bacterium_g__Ferrovibrio	OTU2276	2	2	1	1	3	2	0	1	2	1	4	1	2	5	11	2	1	0	1	1	1	11	1	3	13	1	1	74
d__Bacteria	k__norank_d__Bacteria	p__Firmicutes	c__Bacilli	o__Bacillales	f__Bacillaceae	g__Fictibacillus	s__unclassified_g__Fictibacillus	OTU4321	21	12	8	9	14	9	2	0	5	15	3	7	3	12	11	93	148	11	2	3	1	4	11	15	12	6	4	441
d__Bacteria	k__norank_d__Bacteria	p__Planctomycetes	c__Planctomycetacia	o__Gemmatales	f__Gemmataceae	g__Fimbriiglobus	s__uncultured_bacterium_g__Fimbriiglobus	OTU1874	5	8	0	0	6	1	0	0	0	0	6	3	0	8	5	1	2	2	0	0	0	2	3	1	4	2	0	59
d__Bacteria	k__norank_d__Bacteria	p__Bacteroidetes	c__Bacteroidia	o__Chitinophagales	f__Chitinophagaceae	g__Flavihumibacter	s__uncultured_bacterium_g__Flavihumibacter	OTU1160	8	8	12	27	31	11	6	17	70	64	16	23	2	18	119	1	5	20	36	12	6	22	15	21	37	28	17	652
d__Bacteria	k__norank_d__Bacteria	p__Bacteroidetes	c__Bacteroidia	o__Chitinophagales	f__Chitinophagaceae	g__Flavisolibacter	s__unclassified_g__Flavisolibacter	OTU4525	2	1	2	6	0	1	0	0	1	1	1	0	0	2	4	2	0	14	5	0	4	6	5	1	0	0	6	64
d__Bacteria	k__norank_d__Bacteria	p__Bacteroidetes	c__Bacteroidia	o__Chitinophagales	f__Chitinophagaceae	g__Flavisolibacter	s__unclassified_g__Flavisolibacter	OTU3669	45	42	46	158	47	87	56	61	107	88	70	95	74	56	87	42	16	137	107	59	67	104	140	74	50	82	88	2085
d__Bacteria	k__norank_d__Bacteria	p__Bacteroidetes	c__Bacteroidia	o__Chitinophagales	f__Chitinophagaceae	g__Flavisolibacter	s__unclassified_g__Flavisolibacter	OTU2352	13	14	18	11	10	11	6	14	26	15	26	24	7	30	23	8	1	14	9	19	6	13	37	12	4	26	17	414
d__Bacteria	k__norank_d__Bacteria	p__Bacteroidetes	c__Bacteroidia	o__Chitinophagales	f__Chitinophagaceae	g__Flavitalea	s__uncultured_bacterium_g__Flavitalea	OTU4491	13	14	9	48	7	7	16	15	13	21	6	16	18	11	18	6	2	6	17	9	14	20	21	14	22	14	26	403
d__Bacteria	k__norank_d__Bacteria	p__Bacteroidetes	c__Bacteroidia	o__Flavobacteriales	f__Flavobacteriaceae	g__Flavobacterium	s__unclassified_g__Flavobacterium	OTU222	1	0	0	2	32	10	3	3	34	1	22	20	2	13	23	0	5	0	6	7	0	5	6	3	12	19	2	231
d__Bacteria	k__norank_d__Bacteria	p__Bacteroidetes	c__Bacteroidia	o__Flavobacteriales	f__Flavobacteriaceae	g__Flavobacterium	s__unclassified_g__Flavobacterium	OTU4549	13	16	7	181	91	51	34	116	47	136	56	26	50	11	23	222	37	301	95	27	22	52	52	119	18	17	14	1834
d__Bacteria	k__norank_d__Bacteria	p__Bacteroidetes	c__Bacteroidia	o__Flavobacteriales	f__Flavobacteriaceae	g__Flavobacterium	s__unclassified_g__Flavobacterium	OTU236	0	0	0	0	22	0	0	7	3	0	6	2	0	0	0	9	0	0	1	0	0	0	2	2	0	0	0	54
d__Bacteria	k__norank_d__Bacteria	p__Bacteroidetes	c__Bacteroidia	o__Flavobacteriales	f__Flavobacteriaceae	g__Flavobacterium	s__Flavobacterium_cucumis	OTU235	0	0	0	0	30	9	6	4	31	214	6	10	0	5	13	1	7	2	6	7	1	2	4	21	1	13	0	393
d__Bacteria	k__norank_d__Bacteria	p__Bacteroidetes	c__Bacteroidia	o__Flavobacteriales	f__Flavobacteriaceae	g__Flavobacterium	s__unclassified_g__Flavobacterium	OTU3631	0	3	14	0	0	2	0	1	2	3	0	0	0	0	4	0	0	3	0	0	0	0	0	1	5	1	0	39
d__Bacteria	k__norank_d__Bacteria	p__Bacteroidetes	c__Bacteroidia	o__Flavobacteriales	f__Flavobacteriaceae	g__Flavobacterium	s__unclassified_g__Flavobacterium	OTU2348	28	1	15	6	13	9	3	2	0	0	6	3	11	0	0	34	3	5	0	13	8	4	6	7	2	4	1	184
d__Bacteria	k__norank_d__Bacteria	p__Bacteroidetes	c__Bacteroidia	o__Flavobacteriales	f__Flavobacteriaceae	g__Flavobacterium	s__unclassified_g__Flavobacterium	OTU622	0	1	0	0	7	1	4	1	7	42	4	4	2	6	8	7	1	6	1	0	1	5	1	6	8	9	2	134
d__Bacteria	k__norank_d__Bacteria	p__Bacteroidetes	c__Bacteroidia	o__Flavobacteriales	f__Flavobacteriaceae	g__Flavobacterium	s__unclassified_g__Flavobacterium	OTU1348	8	22	15	1	59	31	3	8	147	15	60	79	9	15	134	8	12	16	60	13	5	24	21	17	39	43	8	872
d__Bacteria	k__norank_d__Bacteria	p__Bacteroidetes	c__Bacteroidia	o__Flavobacteriales	f__Flavobacteriaceae	g__Flavobacterium	s__Flavobacterium_cucumis	OTU4153	2	3	0	1	6	32	45	10	35	120	5	7	20	3	36	111	14	71	14	8	7	15	14	20	5	8	10	622
d__Bacteria	k__norank_d__Bacteria	p__Bacteroidetes	c__Bacteroidia	o__Flavobacteriales	f__Flavobacteriaceae	g__Flavobacterium	s__unclassified_g__Flavobacterium	OTU2366	0	0	1	1	8	1	1	0	1	2	2	2	6	1	3	1	1	2	5	1	1	1	3	2	3	0	1	50
d__Bacteria	k__norank_d__Bacteria	p__Bacteroidetes	c__Bacteroidia	o__Flavobacteriales	f__Flavobacteriaceae	g__Flavobacterium	s__Flavobacterium_hauense	OTU4603	1	0	2	3	9	3	3	1	1	3	4	6	1	2	3	5	2	12	3	7	2	2	1	5	3	1	2	87
d__Bacteria	k__norank_d__Bacteria	p__Bacteroidetes	c__Bacteroidia	o__Flavobacteriales	f__Flavobacteriaceae	g__Flavobacterium	s__unclassified_g__Flavobacterium	OTU3995	3	6	5	3	17	13	2	6	45	4	10	17	6	7	89	2	1	7	1	8	8	10	4	10	40	6	18	348
d__Bacteria	k__norank_d__Bacteria	p__Bacteroidetes	c__Bacteroidia	o__Flavobacteriales	f__Flavobacteriaceae	g__Flavobacterium	s__unclassified_g__Flavobacterium	OTU101	0	0	0	3	1	4	2	0	1	1	1	1	1	0	4	0	0	8	6	1	2	5	1	0	2	0	3	47
d__Bacteria	k__norank_d__Bacteria	p__Bacteroidetes	c__Bacteroidia	o__Flavobacteriales	f__Flavobacteriaceae	g__Flavobacterium	s__Flavobacterium_daejeonense	OTU250	96	12	21	227	259	329	166	269	325	32	291	278	81	159	112	177	57	108	244	259	93	52	359	105	66	264	33	4474
d__Bacteria	k__norank_d__Bacteria	p__Bacteroidetes	c__Bacteroidia	o__Flavobacteriales	f__Flavobacteriaceae	g__Flavobacterium	s__unclassified_g__Flavobacterium	OTU4090	0	0	0	2	0	3	0	0	0	0	0	0	0	0	0	2	0	0	0	0	1	1	2	2	0	0	2	15
d__Bacteria	k__norank_d__Bacteria	p__Bacteroidetes	c__Bacteroidia	o__Flavobacteriales	f__Flavobacteriaceae	g__Flavobacterium	s__unclassified_g__Flavobacterium	OTU3722	35	10	28	89	157	161	30	199	145	20	228	248	34	152	116	145	34	33	227	228	24	50	212	100	72	272	33	3082
d__Bacteria	k__norank_d__Bacteria	p__Bacteroidetes	c__Bacteroidia	o__Flavobacteriales	f__Flavobacteriaceae	g__Flavobacterium	s__Flavobacterium_hauense	OTU2307	1	0	0	0	4	10	0	0	0	0	2	0	2	1	1	5	0	1	0	11	1	0	0	0	0	0	1	40
d__Bacteria	k__norank_d__Bacteria	p__Bacteroidetes	c__Bacteroidia	o__Flavobacteriales	f__Flavobacteriaceae	g__Flavobacterium	s__Flavobacterium_soli	OTU855	0	0	0	3	17	2	2	4	2	2	4	0	87	1	18	8	0	5	8	0	1	0	3	1	3	1	20	192
d__Bacteria	k__norank_d__Bacteria	p__Bacteroidetes	c__Bacteroidia	o__Flavobacteriales	f__Flavobacteriaceae	g__Flavobacterium	s__unclassified_g__Flavobacterium	OTU144	2	0	0	140	183	59	30	155	64	10	23	36	36	17	21	100	9	36	63	41	26	34	79	23	11	32	6	1236
d__Bacteria	k__norank_d__Bacteria	p__Bacteroidetes	c__Bacteroidia	o__Flavobacteriales	f__Flavobacteriaceae	g__Flavobacterium	s__Flavobacterium_flevense	OTU4251	1	2	0	4	136	12	3	13	10	4	36	33	8	36	16	37	12	25	30	55	1	17	60	13	7	91	6	668
d__Bacteria	k__norank_d__Bacteria	p__Bacteroidetes	c__Bacteroidia	o__Flavobacteriales	f__Flavobacteriaceae	g__Flavobacterium	s__unclassified_g__Flavobacterium	OTU2267	0	0	0	0	16	9	4	4	26	5	5	18	1	0	1	15	2	11	15	1	2	1	2	8	0	1	0	147
d__Bacteria	k__norank_d__Bacteria	p__Bacteroidetes	c__Bacteroidia	o__Flavobacteriales	f__Flavobacteriaceae	g__Flavobacterium	s__unclassified_g__Flavobacterium	OTU1776	11	11	7	3	8	26	25	5	15	44	9	2	19	6	31	82	24	79	16	8	0	9	13	23	9	18	15	518
d__Bacteria	k__norank_d__Bacteria	p__Bacteroidetes	c__Bacteroidia	o__Flavobacteriales	f__Flavobacteriaceae	g__Flavobacterium	s__unclassified_g__Flavobacterium	OTU764	2	1	1	12	9	6	3	5	1	0	1	9	1	1	0	10	1	1	0	6	1	1	2	1	0	0	0	75
d__Bacteria	k__norank_d__Bacteria	p__Bacteroidetes	c__Bacteroidia	o__Flavobacteriales	f__Flavobacteriaceae	g__Flavobacterium	s__unclassified_g__Flavobacterium	OTU4487	7	0	3	401	341	415	230	484	249	61	85	141	153	41	75	264	37	126	327	63	104	122	500	145	14	154	30	4572
d__Bacteria	k__norank_d__Bacteria	p__Bacteroidetes	c__Bacteroidia	o__Flavobacteriales	f__Flavobacteriaceae	g__Flavobacterium	s__unclassified_g__Flavobacterium	OTU3627	9	4	9	2	4	3	2	2	8	0	4	4	2	5	15	0	3	1	0	7	0	2	5	4	24	5	5	129
d__Bacteria	k__norank_d__Bacteria	p__Bacteroidetes	c__Bacteroidia	o__Flavobacteriales	f__Crocinitomicaceae	g__Fluviicola	s__unclassified_g__Fluviicola	OTU1517	0	0	1	0	0	2	3	0	1	26	0	1	0	1	0	4	0	9	1	0	0	0	0	0	0	0	0	49
d__Bacteria	k__norank_d__Bacteria	p__Bacteroidetes	c__Bacteroidia	o__Flavobacteriales	f__Crocinitomicaceae	g__Fluviicola	s__unclassified_g__Fluviicola	OTU629	5	8	34	0	4	3	3	5	5	7	9	5	2	6	10	3	5	7	0	2	0	0	5	3	2	5	5	143
d__Bacteria	k__norank_d__Bacteria	p__Bacteroidetes	c__Bacteroidia	o__Flavobacteriales	f__Crocinitomicaceae	g__Fluviicola	s__uncultured_bacterium_g__Fluviicola	OTU1012	1	1	0	0	7	0	1	0	5	7	3	1	10	0	1	1	0	0	1	0	0	0	0	6	1	0	12	58
d__Bacteria	k__norank_d__Bacteria	p__Bacteroidetes	c__Bacteroidia	o__Flavobacteriales	f__Crocinitomicaceae	g__Fluviicola	s__unclassified_g__Fluviicola	OTU1190	3	0	2	53	11	32	34	33	16	41	16	11	2	14	12	16	2	26	45	54	8	17	23	36	3	9	9	528
d__Bacteria	k__norank_d__Bacteria	p__Bacteroidetes	c__Bacteroidia	o__Flavobacteriales	f__Crocinitomicaceae	g__Fluviicola	s__uncultured_bacterium_g__Fluviicola	OTU1394	0	1	0	36	55	3	0	3	6	4	8	6	1	8	1	15	3	1	0	7	0	3	1	9	10	10	8	199
d__Bacteria	k__norank_d__Bacteria	p__Bacteroidetes	c__Bacteroidia	o__Flavobacteriales	f__Crocinitomicaceae	g__Fluviicola	s__unclassified_g__Fluviicola	OTU1594	0	0	0	7	8	8	2	3	0	0	0	0	3	0	3	4	4	0	5	1	0	2	0	0	0	0	0	50
d__Bacteria	k__norank_d__Bacteria	p__Actinobacteria	c__Actinobacteria	o__Frankiales	f__Cryptosporangiaceae	g__Fodinicola	s__uncultured_bacterium_g__Fodinicola	OTU578	1	1	0	1	1	1	1	0	2	0	3	9	0	4	1	1	1	1	2	2	0	4	9	2	2	1	0	50
d__Bacteria	k__norank_d__Bacteria	p__Proteobacteria	c__Gammaproteobacteria	o__Betaproteobacteriales	f__Nitrosomonadaceae	g__GOUTA6	s__unclassified_g__GOUTA6	OTU4357	5	2	0	0	0	0	0	0	2	1	0	0	0	2	6	26	59	0	0	2	0	8	2	0	2	0	7	124
d__Bacteria	k__norank_d__Bacteria	p__Acidobacteria	c__Acidobacteriia	o__Solibacterales	f__Solibacteraceae_Subgroup_3	g__GOUTB8	s__uncultured_soil_bacterium_g__GOUTB8	OTU2052	14	9	4	2	7	8	3	13	26	8	12	7	4	20	11	8	50	6	7	12	3	16	18	3	18	14	9	312
d__Bacteria	k__norank_d__Bacteria	p__Actinobacteria	c__Actinobacteria	o__Gaiellales	f__Gaiellaceae	g__Gaiella	s__unclassified_g__Gaiella	OTU486	67	82	51	15	58	24	22	21	26	49	81	65	21	88	81	30	21	37	36	54	10	46	107	25	43	50	44	1254
d__Bacteria	k__norank_d__Bacteria	p__Actinobacteria	c__Actinobacteria	o__Gaiellales	f__Gaiellaceae	g__Gaiella	s__unclassified_g__Gaiella	OTU2952	16	13	3	5	16	9	4	2	4	3	14	19	5	14	4	2	8	10	2	12	2	7	12	3	3	3	4	199
d__Bacteria	k__norank_d__Bacteria	p__Actinobacteria	c__Actinobacteria	o__Gaiellales	f__Gaiellaceae	g__Gaiella	s__uncultured_soil_bacterium_g__Gaiella	OTU3207	6	12	2	2	4	3	0	1	4	6	11	8	2	6	7	6	3	2	2	7	2	5	9	3	5	5	9	132
d__Bacteria	k__norank_d__Bacteria	p__Actinobacteria	c__Actinobacteria	o__Gaiellales	f__Gaiellaceae	g__Gaiella	s__uncultured_Rubrobacterales_bacterium_g__Gaiella	OTU3066	86	71	23	16	114	27	17	11	22	43	184	219	40	125	42	58	25	141	24	139	15	97	166	89	142	57	54	2047
d__Bacteria	k__norank_d__Bacteria	p__Actinobacteria	c__Actinobacteria	o__Gaiellales	f__Gaiellaceae	g__Gaiella	s__unclassified_g__Gaiella	OTU3096	2	8	2	0	7	2	2	3	4	3	9	5	2	6	0	2	6	3	0	4	0	8	13	6	2	8	3	110
d__Bacteria	k__norank_d__Bacteria	p__Actinobacteria	c__Actinobacteria	o__Gaiellales	f__Gaiellaceae	g__Gaiella	s__uncultured_actinobacterium_g__Gaiella	OTU3057	40	57	24	4	70	11	4	2	5	11	84	64	15	64	23	20	25	20	7	74	3	28	69	24	28	20	20	816
d__Bacteria	k__norank_d__Bacteria	p__Actinobacteria	c__Actinobacteria	o__Gaiellales	f__Gaiellaceae	g__Gaiella	s__unclassified_g__Gaiella	OTU2765	1	4	3	0	3	1	0	1	1	0	1	3	4	3	3	4	5	3	3	3	2	6	3	1	2	1	1	62
d__Bacteria	k__norank_d__Bacteria	p__Bacteroidetes	c__Bacteroidia	o__Flavobacteriales	f__Flavobacteriaceae	g__Galbibacter	s__Galbibacter_marinus	OTU2235	103	215	379	353	54	168	66	169	84	66	263	57	63	275	13	220	9	59	322	204	50	26	47	62	27	193	20	3567
d__Bacteria	k__norank_d__Bacteria	p__Cyanobacteria	c__Oxyphotobacteria	o__Geitlerinematales	f__Geitlerinemataceae	g__Geitlerinema	s__Geitlerinema_sp._PCC_7407	OTU3012	7	4	12	3	21	3	2	10	7	17	9	3	7	17	9	9	1	1	5	8	1	23	6	20	6	2	3	216
d__Bacteria	k__norank_d__Bacteria	p__Bacteroidetes	c__Bacteroidia	o__Flavobacteriales	f__Flavobacteriaceae	g__Gelidibacter	s__uncultured_bacterium_g__Gelidibacter	OTU4091	1	1	1	3	11	0	0	1	3	0	2	39	0	1	1	2	0	0	0	1	1	0	0	1	6	7	1	83
d__Bacteria	k__norank_d__Bacteria	p__Planctomycetes	c__Planctomycetacia	o__Gemmatales	f__Gemmataceae	g__Gemmata	s__uncultured_Planctomycetales_bacterium_g__Gemmata	OTU874	0	0	0	0	3	1	1	0	1	0	5	4	1	4	7	5	0	2	0	2	0	0	2	1	2	4	1	46
d__Bacteria	k__norank_d__Bacteria	p__Planctomycetes	c__Planctomycetacia	o__Gemmatales	f__Gemmataceae	g__Gemmata	s__uncultured_endolithic_bacterium_g__Gemmata	OTU1835	1	4	0	0	7	1	0	0	0	1	3	5	0	6	1	4	1	13	0	5	1	9	2	3	7	0	1	75
d__Bacteria	k__norank_d__Bacteria	p__Planctomycetes	c__Planctomycetacia	o__Gemmatales	f__Gemmataceae	g__Gemmata	s__uncultured_bacterium_g__Gemmata	OTU2556	4	5	0	0	1	0	1	0	0	1	5	1	0	4	1	0	0	3	2	1	1	6	2	0	7	0	1	46
d__Bacteria	k__norank_d__Bacteria	p__Planctomycetes	c__Planctomycetacia	o__Gemmatales	f__Gemmataceae	g__Gemmata	s__uncultured_Gemmata_sp._g__Gemmata	OTU2151	6	4	8	3	4	10	6	3	3	1	8	8	9	15	7	3	1	15	11	9	2	12	4	7	16	8	5	188
d__Bacteria	k__norank_d__Bacteria	p__Planctomycetes	c__Planctomycetacia	o__Gemmatales	f__Gemmataceae	g__Gemmata	s__unclassified_g__Gemmata	OTU4037	2	1	4	8	34	10	6	15	3	9	17	12	2	15	0	9	2	19	12	27	8	6	8	13	7	12	7	268
d__Bacteria	k__norank_d__Bacteria	p__Planctomycetes	c__Planctomycetacia	o__Gemmatales	f__Gemmataceae	g__Gemmata	s__uncultured_bacterium_g__Gemmata	OTU4099	5	3	1	2	1	1	1	1	4	2	4	1	1	2	5	5	1	7	0	2	2	12	2	4	26	0	1	96
d__Bacteria	k__norank_d__Bacteria	p__Planctomycetes	c__Planctomycetacia	o__Gemmatales	f__Gemmataceae	g__Gemmata	s__uncultured_bacterium_g__Gemmata	OTU3654	5	15	2	1	11	0	1	2	1	3	6	4	3	6	13	3	7	3	7	8	0	6	6	6	26	4	3	152
d__Bacteria	k__norank_d__Bacteria	p__Gemmatimonadetes	c__Gemmatimonadetes	o__Gemmatimonadales	f__Gemmatimonadaceae	g__Gemmatimonas	s__unclassified_g__Gemmatimonas	OTU596	3	0	0	1	2	0	3	0	0	0	3	0	8	2	1	1	0	13	1	0	0	4	1	0	2	0	2	47
d__Bacteria	k__norank_d__Bacteria	p__Gemmatimonadetes	c__Gemmatimonadetes	o__Gemmatimonadales	f__Gemmatimonadaceae	g__Gemmatimonas	s__unclassified_g__Gemmatimonas	OTU547	8	7	2	2	18	1	1	1	0	0	24	42	3	20	3	2	3	36	0	22	0	22	10	6	7	4	1	245
d__Bacteria	k__norank_d__Bacteria	p__Gemmatimonadetes	c__Gemmatimonadetes	o__Gemmatimonadales	f__Gemmatimonadaceae	g__Gemmatimonas	s__metagenome_g__Gemmatimonas	OTU2720	1	2	0	0	4	6	1	1	1	0	3	5	0	2	0	3	0	5	3	31	0	6	2	1	2	5	3	87
d__Bacteria	k__norank_d__Bacteria	p__Gemmatimonadetes	c__Gemmatimonadetes	o__Gemmatimonadales	f__Gemmatimonadaceae	g__Gemmatimonas	s__uncultured_bacterium_g__Gemmatimonas	OTU2992	34	22	35	7	9	14	13	7	5	23	19	6	12	23	4	6	4	28	7	28	7	43	31	8	21	14	23	453
d__Bacteria	k__norank_d__Bacteria	p__Gemmatimonadetes	c__Gemmatimonadetes	o__Gemmatimonadales	f__Gemmatimonadaceae	g__Gemmatimonas	s__unclassified_g__Gemmatimonas	OTU3118	1	0	2	3	2	6	4	0	2	2	2	2	2	2	1	1	1	16	7	0	5	7	1	1	1	1	2	74
d__Bacteria	k__norank_d__Bacteria	p__Gemmatimonadetes	c__Gemmatimonadetes	o__Gemmatimonadales	f__Gemmatimonadaceae	g__Gemmatimonas	s__uncultured_bacterium_g__Gemmatimonas	OTU3861	2	0	0	0	0	0	0	0	0	0	0	0	5	1	0	0	0	13	0	0	8	1	0	0	0	0	9	39
d__Bacteria	k__norank_d__Bacteria	p__Gemmatimonadetes	c__Gemmatimonadetes	o__Gemmatimonadales	f__Gemmatimonadaceae	g__Gemmatimonas	s__unclassified_g__Gemmatimonas	OTU2974	11	17	13	2	6	5	4	0	1	1	16	10	6	27	1	4	3	11	1	22	3	18	6	9	6	0	2	205
d__Bacteria	k__norank_d__Bacteria	p__Gemmatimonadetes	c__Gemmatimonadetes	o__Gemmatimonadales	f__Gemmatimonadaceae	g__Gemmatimonas	s__uncultured_bacterium_g__Gemmatimonas	OTU3319	8	2	13	2	0	1	8	0	4	4	2	0	6	2	0	3	1	8	6	0	3	18	1	1	15	0	0	108
d__Bacteria	k__norank_d__Bacteria	p__Gemmatimonadetes	c__Gemmatimonadetes	o__Gemmatimonadales	f__Gemmatimonadaceae	g__Gemmatimonas	s__unclassified_g__Gemmatimonas	OTU693	8	19	2	0	4	1	0	0	1	1	14	10	4	15	2	0	2	0	0	11	0	0	5	8	1	4	4	116
d__Bacteria	k__norank_d__Bacteria	p__Gemmatimonadetes	c__Gemmatimonadetes	o__Gemmatimonadales	f__Gemmatimonadaceae	g__Gemmatimonas	s__unclassified_g__Gemmatimonas	OTU4170	8	1	1	2	8	5	2	1	0	0	4	4	8	6	0	11	0	23	4	4	5	4	4	12	8	3	5	133
d__Bacteria	k__norank_d__Bacteria	p__Gemmatimonadetes	c__Gemmatimonadetes	o__Gemmatimonadales	f__Gemmatimonadaceae	g__Gemmatimonas	s__uncultured_bacterium_g__Gemmatimonas	OTU3251	1	0	1	1	7	0	0	0	2	0	7	0	1	5	1	5	1	0	3	4	0	0	0	5	4	1	0	49
d__Bacteria	k__norank_d__Bacteria	p__Gemmatimonadetes	c__Gemmatimonadetes	o__Gemmatimonadales	f__Gemmatimonadaceae	g__Gemmatimonas	s__unclassified_g__Gemmatimonas	OTU4039	21	18	19	10	5	2	7	3	4	15	12	0	11	14	1	3	1	9	1	21	7	20	15	13	17	12	21	282
d__Bacteria	k__norank_d__Bacteria	p__Gemmatimonadetes	c__Gemmatimonadetes	o__Gemmatimonadales	f__Gemmatimonadaceae	g__Gemmatimonas	s__uncultured_soil_bacterium_g__Gemmatimonas	OTU2954	2	2	0	0	1	2	2	1	1	2	4	2	0	2	3	0	0	2	1	0	0	5	7	4	2	0	1	46
d__Bacteria	k__norank_d__Bacteria	p__Proteobacteria	c__Deltaproteobacteria	o__Desulfuromonadales	f__Geobacteraceae	g__Geobacter	s__uncultured_delta_proteobacterium_g__Geobacter	OTU738	3	3	1	0	2	0	0	1	1	1	3	1	2	1	3	11	16	0	0	2	0	2	1	0	0	0	1	55
d__Bacteria	k__norank_d__Bacteria	p__Proteobacteria	c__Deltaproteobacteria	o__Desulfuromonadales	f__Geobacteraceae	g__Geobacter	s__unclassified_g__Geobacter	OTU2909	8	3	3	1	6	5	0	3	1	1	2	4	2	8	2	35	44	3	0	4	0	5	4	2	4	4	5	159
d__Bacteria	k__norank_d__Bacteria	p__Bacteroidetes	c__Bacteroidia	o__Flavobacteriales	f__Flavobacteriaceae	g__Gillisia	s__uncultured_Antarcticimonas_sp.	OTU2078	10	8	167	1	0	0	0	0	0	0	0	0	3	0	0	2	0	0	1	0	1	0	0	3	1	2	3	202
d__Bacteria	k__norank_d__Bacteria	p__Actinobacteria	c__Actinobacteria	o__Glycomycetales	f__Glycomycetaceae	g__Glycomyces	s__Glycomyces_harbinensis	OTU781	8	3	1	0	1	2	2	0	0	1	0	2	4	3	0	4	2	5	0	0	0	4	4	4	0	0	0	50
d__Bacteria	k__norank_d__Bacteria	p__Acidobacteria	c__Acidobacteriia	o__Acidobacteriales	f__Acidobacteriaceae_Subgroup_1	g__Granulicella	s__unclassified_g__Granulicella	OTU1207	0	0	0	1	0	0	3	0	0	0	0	0	2	0	0	0	0	0	5	0	4	0	0	0	1	0	1	17
d__Bacteria	k__norank_d__Bacteria	p__Proteobacteria	c__Deltaproteobacteria	o__Myxococcales	f__Haliangiaceae	g__Haliangium	s__uncultured_Nannocystineae_bacterium_g__Haliangium	OTU2793	4	1	0	0	1	0	1	0	0	0	1	4	1	5	1	5	1	14	0	4	1	7	0	1	2	0	0	54
d__Bacteria	k__norank_d__Bacteria	p__Proteobacteria	c__Deltaproteobacteria	o__Myxococcales	f__Haliangiaceae	g__Haliangium	s__unclassified_g__Haliangium	OTU4510	1	0	0	0	0	0	8	0	0	2	0	1	0	0	0	0	0	6	1	0	3	1	0	0	2	0	0	25
d__Bacteria	k__norank_d__Bacteria	p__Proteobacteria	c__Deltaproteobacteria	o__Myxococcales	f__Haliangiaceae	g__Haliangium	s__unclassified_g__Haliangium	OTU3095	8	9	5	1	3	5	1	0	1	0	3	2	0	1	1	21	9	1	1	4	0	9	6	3	11	1	2	108
d__Bacteria	k__norank_d__Bacteria	p__Proteobacteria	c__Deltaproteobacteria	o__Myxococcales	f__Haliangiaceae	g__Haliangium	s__unclassified_g__Haliangium	OTU1737	5	1	0	0	0	0	0	0	0	0	0	0	0	0	1	62	62	0	0	0	0	0	2	0	0	0	0	133
d__Bacteria	k__norank_d__Bacteria	p__Proteobacteria	c__Deltaproteobacteria	o__Myxococcales	f__Haliangiaceae	g__Haliangium	s__unclassified_g__Haliangium	OTU3383	3	6	2	2	5	3	0	1	2	2	22	6	0	3	12	1	3	0	2	8	1	8	7	4	3	12	3	121
d__Bacteria	k__norank_d__Bacteria	p__Proteobacteria	c__Deltaproteobacteria	o__Myxococcales	f__Haliangiaceae	g__Haliangium	s__unclassified_g__Haliangium	OTU2402	4	5	0	0	4	2	9	6	2	2	2	2	1	3	5	3	2	6	1	3	6	4	0	3	1	3	1	80
d__Bacteria	k__norank_d__Bacteria	p__Proteobacteria	c__Deltaproteobacteria	o__Myxococcales	f__Haliangiaceae	g__Haliangium	s__unclassified_g__Haliangium	OTU2773	18	43	11	11	8	2	11	11	14	11	11	6	4	9	18	8	3	25	12	9	6	23	12	15	17	7	6	331
d__Bacteria	k__norank_d__Bacteria	p__Proteobacteria	c__Deltaproteobacteria	o__Myxococcales	f__Haliangiaceae	g__Haliangium	s__uncultured_bacterium_g__Haliangium	OTU700	7	15	1	0	0	0	0	0	0	1	3	2	0	2	3	4	4	0	0	2	0	3	3	0	3	0	0	53
d__Bacteria	k__norank_d__Bacteria	p__Proteobacteria	c__Deltaproteobacteria	o__Myxococcales	f__Haliangiaceae	g__Haliangium	s__unclassified_g__Haliangium	OTU2722	17	10	4	7	9	9	11	8	6	2	6	22	7	13	8	8	23	91	12	21	8	31	24	9	30	5	13	414
d__Bacteria	k__norank_d__Bacteria	p__Proteobacteria	c__Deltaproteobacteria	o__Myxococcales	f__Haliangiaceae	g__Haliangium	s__uncultured_Myxococcales_bacterium_g__Haliangium	OTU2879	5	3	3	0	0	0	0	1	1	3	1	2	0	1	1	4	2	8	2	4	0	5	1	1	5	1	1	55
d__Bacteria	k__norank_d__Bacteria	p__Proteobacteria	c__Deltaproteobacteria	o__Myxococcales	f__Haliangiaceae	g__Haliangium	s__uncultured_bacterium_g__Haliangium	OTU2869	6	8	4	0	7	2	0	1	0	2	7	6	1	8	4	4	7	1	1	2	1	15	5	3	11	2	4	112
d__Bacteria	k__norank_d__Bacteria	p__Proteobacteria	c__Deltaproteobacteria	o__Myxococcales	f__Haliangiaceae	g__Haliangium	s__uncultured_delta_proteobacterium_g__Haliangium	OTU3053	10	8	5	4	5	1	2	1	2	0	8	2	2	14	1	1	3	7	3	6	1	6	11	5	5	7	0	120
d__Bacteria	k__norank_d__Bacteria	p__Proteobacteria	c__Deltaproteobacteria	o__Myxococcales	f__Haliangiaceae	g__Haliangium	s__uncultured_Haliangium_sp.	OTU2938	6	5	10	4	6	7	2	8	4	7	32	34	5	59	11	3	2	26	6	27	2	28	39	13	25	38	9	418
d__Bacteria	k__norank_d__Bacteria	p__Proteobacteria	c__Deltaproteobacteria	o__Myxococcales	f__Haliangiaceae	g__Haliangium	s__unclassified_g__Haliangium	OTU2910	12	9	6	1	1	3	2	1	3	6	14	1	4	10	2	8	2	3	0	8	0	7	16	2	12	4	6	143
d__Bacteria	k__norank_d__Bacteria	p__Proteobacteria	c__Deltaproteobacteria	o__Myxococcales	f__Haliangiaceae	g__Haliangium	s__delta_proteobacterium_LWH25	OTU3224	5	6	3	1	9	2	0	0	1	1	5	4	0	6	0	7	16	0	0	3	0	3	1	2	0	1	1	77
d__Bacteria	k__norank_d__Bacteria	p__Proteobacteria	c__Deltaproteobacteria	o__Myxococcales	f__Haliangiaceae	g__Haliangium	s__uncultured_delta_proteobacterium_g__Haliangium	OTU2425	37	17	25	4	17	5	7	4	5	6	21	27	11	33	13	20	5	35	5	30	6	31	14	10	19	11	10	428
d__Bacteria	k__norank_d__Bacteria	p__Proteobacteria	c__Deltaproteobacteria	o__Myxococcales	f__Haliangiaceae	g__Haliangium	s__unclassified_g__Haliangium	OTU2599	12	46	11	8	13	6	6	13	17	9	30	16	4	14	25	9	9	8	6	22	1	16	26	32	23	32	8	422
d__Bacteria	k__norank_d__Bacteria	p__Firmicutes	c__Bacilli	o__Bacillales	f__Bacillaceae	g__Halobacillus	s__unclassified_g__Halobacillus	OTU3284	6	5	21	1	1	1	1	0	3	5	4	7	5	1	3	3	4	3	2	4	0	0	4	4	5	5	2	100
d__Bacteria	k__norank_d__Bacteria	p__Proteobacteria	c__Gammaproteobacteria	o__Oceanospirillales	f__Halomonadaceae	g__Halomonas	s__unclassified_g__Halomonas	OTU1331	87	17	1053	9	15	9	16	0	0	2	1	6	9	4	1	5	2	3	3	8	4	5	7	6	10	11	17	1310
d__Bacteria	k__norank_d__Bacteria	p__Proteobacteria	c__Gammaproteobacteria	o__Oceanospirillales	f__Halomonadaceae	g__Halomonas	s__unclassified_g__Halomonas	OTU2109	37	11	185	2	1	4	4	0	0	0	2	1	2	0	0	5	0	4	8	3	7	1	1	22	3	2	3	308
d__Bacteria	k__norank_d__Bacteria	p__Proteobacteria	c__Alphaproteobacteria	o__Rhodobacterales	f__Rhodobacteraceae	g__Halovulum	s__Halovulum_dunhuangense	OTU3513	1	0	0	3	5	0	0	0	0	0	1	1	0	1	1	0	1	0	0	0	0	0	0	3	14	1	0	32
d__Bacteria	k__norank_d__Bacteria	p__Chloroflexi	c__Chloroflexia	o__Chloroflexales	f__Herpetosiphonaceae	g__Herpetosiphon	s__uncultured_Chloroflexi_bacterium_g__Herpetosiphon	OTU842	0	1	0	0	8	6	0	1	2	1	18	6	0	2	19	0	2	0	3	4	0	7	14	2	8	1	1	106
d__Bacteria	k__norank_d__Bacteria	p__Chloroflexi	c__Chloroflexia	o__Chloroflexales	f__Herpetosiphonaceae	g__Herpetosiphon	s__unclassified_g__Herpetosiphon	OTU463	5	3	4	1	6	5	0	0	8	1	14	4	2	0	17	0	6	1	3	3	2	10	3	1	0	2	2	103
d__Bacteria	k__norank_d__Bacteria	p__Chloroflexi	c__Chloroflexia	o__Chloroflexales	f__Herpetosiphonaceae	g__Herpetosiphon	s__uncultured_Chloroflexi_bacterium_g__Herpetosiphon	OTU908	3	0	0	0	2	0	0	0	0	0	3	10	0	1	6	1	0	0	1	5	0	0	4	1	3	2	0	42
d__Bacteria	k__norank_d__Bacteria	p__Acidobacteria	c__Holophagae	o__Holophagales	f__Holophagaceae	g__Holophaga	s__uncultured_bacterium_g__Holophaga	OTU3299	2	3	1	0	6	4	5	2	0	0	5	3	11	15	0	3	2	9	7	4	8	19	1	0	9	3	3	125
d__Bacteria	k__norank_d__Bacteria	p__Bacteroidetes	c__Bacteroidia	o__Flavobacteriales	f__Flavobacteriaceae	g__Hoppeia	s__uncultured_Bacteroidetes_bacterium_g__Hoppeia	OTU1370	11	79	12	2	12	0	0	26	21	2	5	17	0	9	16	1	2	0	1	9	0	0	9	5	1	14	5	259
d__Bacteria	k__norank_d__Bacteria	p__Proteobacteria	c__Gammaproteobacteria	o__Betaproteobacteriales	f__Burkholderiaceae	g__Hydrogenophaga	s__Hydrogenophaga_intermedia	OTU1129	2	4	9	69	21	18	27	73	168	94	13	41	13	9	147	7	5	6	60	17	11	41	24	65	17	29	12	1002
d__Bacteria	k__norank_d__Bacteria	p__Proteobacteria	c__Gammaproteobacteria	o__Betaproteobacteriales	f__Burkholderiaceae	g__Hydrogenophaga	s__unclassified_g__Hydrogenophaga	OTU635	3	2	3	13	14	8	22	15	85	170	13	20	10	2	52	15	6	12	25	12	7	22	15	32	4	11	3	596
d__Bacteria	k__norank_d__Bacteria	p__Proteobacteria	c__Alphaproteobacteria	o__Rhizobiales	f__Hyphomicrobiaceae	g__Hyphomicrobium	s__unclassified_g__Hyphomicrobium	OTU2098	10	6	4	12	12	20	11	3	4	15	2	15	9	8	8	5	7	27	12	13	10	16	12	9	17	9	3	279
d__Bacteria	k__norank_d__Bacteria	p__Proteobacteria	c__Alphaproteobacteria	o__Rhizobiales	f__Hyphomicrobiaceae	g__Hyphomicrobium	s__uncultured_bacterium_g__Hyphomicrobium	OTU2841	10	8	2	0	9	4	0	0	1	0	9	4	1	5	5	10	15	4	1	7	0	5	5	4	8	6	2	125
d__Bacteria	k__norank_d__Bacteria	p__Proteobacteria	c__Alphaproteobacteria	o__Rhizobiales	f__Hyphomicrobiaceae	g__Hyphomicrobium	s__unclassified_g__Hyphomicrobium	OTU2126	12	13	7	2	11	4	3	0	0	5	8	12	8	9	15	5	5	10	6	14	0	5	12	22	18	7	7	220
d__Bacteria	k__norank_d__Bacteria	p__Proteobacteria	c__Gammaproteobacteria	o__Betaproteobacteriales	f__Nitrosomonadaceae	g__IS-44	s__uncultured_Rhodocyclaceae_bacterium_g__IS-44	OTU3015	10	6	3	6	1	1	8	1	2	3	4	2	0	15	8	22	1	3	6	10	11	8	9	3	13	10	2	168
d__Bacteria	k__norank_d__Bacteria	p__Proteobacteria	c__Gammaproteobacteria	o__Betaproteobacteriales	f__Nitrosomonadaceae	g__IS-44	s__uncultured_beta_proteobacterium_g__IS-44	OTU1816	9	1	0	0	1	0	0	2	0	1	0	0	0	0	0	87	71	0	0	0	0	0	2	0	0	0	0	174
d__Bacteria	k__norank_d__Bacteria	p__Actinobacteria	c__Actinobacteria	o__Microtrichales	f__Iamiaceae	g__Iamia	s__uncultured_actinobacterium_g__Iamia	OTU2896	5	10	3	1	8	1	1	0	2	1	9	24	2	8	8	3	1	6	0	5	1	12	14	3	8	3	2	141
d__Bacteria	k__norank_d__Bacteria	p__Actinobacteria	c__Actinobacteria	o__Microtrichales	f__Iamiaceae	g__Iamia	s__unclassified_g__Iamia	OTU2141	6	7	1	1	9	4	0	0	2	0	7	7	1	2	1	8	5	0	1	5	0	6	6	2	2	3	0	86
d__Bacteria	k__norank_d__Bacteria	p__Proteobacteria	c__Gammaproteobacteria	o__Alteromonadales	f__Idiomarinaceae	g__Idiomarina	s__unclassified_g__Idiomarina	OTU3764	1	3	25	7	7	0	0	0	1	1	0	0	3	1	0	1	0	1	0	1	0	0	0	0	0	3	2	57
d__Bacteria	k__norank_d__Bacteria	p__Bacteroidetes	c__Ignavibacteria	o__Ignavibacteriales	f__Ignavibacteriaceae	g__Ignavibacterium	s__uncultured_bacterium_g__Ignavibacterium	OTU2326	20	11	22	2	5	0	1	3	6	6	10	3	8	6	1	2	0	3	3	19	0	0	5	4	3	15	3	161
d__Bacteria	k__norank_d__Bacteria	p__Bacteroidetes	c__Ignavibacteria	o__Ignavibacteriales	f__Ignavibacteriaceae	g__Ignavibacterium	s__uncultured_bacterium_g__Ignavibacterium	OTU1102	0	1	0	0	1	0	0	2	5	0	1	1	0	2	3	0	5	0	1	0	1	0	1	0	0	0	0	24
d__Bacteria	k__norank_d__Bacteria	p__Bacteroidetes	c__Ignavibacteria	o__Ignavibacteriales	f__Ignavibacteriaceae	g__Ignavibacterium	s__unclassified_g__Ignavibacterium	OTU1172	11	8	4	1	5	1	1	1	8	4	8	4	1	7	7	1	6	2	0	3	0	1	4	2	6	3	1	100
d__Bacteria	k__norank_d__Bacteria	p__Bacteroidetes	c__Ignavibacteria	o__Ignavibacteriales	f__Ignavibacteriaceae	g__Ignavibacterium	s__uncultured_bacterium_g__Ignavibacterium	OTU1273	3	3	7	1	4	1	0	1	5	3	3	1	0	3	4	0	1	1	0	4	1	1	1	1	0	4	1	54
d__Bacteria	k__norank_d__Bacteria	p__Bacteroidetes	c__Ignavibacteria	o__Ignavibacteriales	f__Ignavibacteriaceae	g__Ignavibacterium	s__uncultured_bacterium_g__Ignavibacterium	OTU55	39	29	49	7	4	4	31	19	1	12	9	2	19	36	1	16	0	11	18	37	14	19	13	10	60	22	11	493
d__Bacteria	k__norank_d__Bacteria	p__Bacteroidetes	c__Ignavibacteria	o__Ignavibacteriales	f__Ignavibacteriaceae	g__Ignavibacterium	s__unclassified_g__Ignavibacterium	OTU3797	4	4	0	0	1	0	0	1	5	0	2	1	0	4	0	0	0	0	1	5	0	0	1	0	0	9	0	38
d__Bacteria	k__norank_d__Bacteria	p__Actinobacteria	c__Actinobacteria	o__Microtrichales	f__Ilumatobacteraceae	g__Ilumatobacter	s__unclassified_g__Ilumatobacter	OTU1246	1	1	1	1	6	2	1	0	3	0	10	15	1	5	14	3	0	0	1	3	1	5	4	4	8	1	1	92
d__Bacteria	k__norank_d__Bacteria	p__Actinobacteria	c__Actinobacteria	o__Microtrichales	f__Ilumatobacteraceae	g__Ilumatobacter	s__metagenome_g__Ilumatobacter	OTU1156	13	14	8	4	22	9	2	1	6	9	25	18	7	24	16	5	6	15	3	8	2	17	18	18	34	13	6	323
d__Bacteria	k__norank_d__Bacteria	p__Acidobacteria	c__Blastocatellia_Subgroup_4	o__Blastocatellales	f__Blastocatellaceae	g__JGI_0001001-H03	s__unclassified_g__JGI_0001001-H03	OTU3109	11	4	19	8	0	3	13	1	2	10	2	4	5	4	6	3	4	51	9	3	8	17	6	9	23	0	6	231
d__Bacteria	k__norank_d__Bacteria	p__Acidobacteria	c__Blastocatellia_Subgroup_4	o__Blastocatellales	f__Blastocatellaceae	g__JGI_0001001-H03	s__unclassified_g__JGI_0001001-H03	OTU3665	2	0	2	0	2	1	3	0	2	1	6	7	2	3	2	1	1	8	0	6	3	12	1	6	11	1	2	85
d__Bacteria	k__norank_d__Bacteria	p__Calditrichaeota	c__Calditrichia	o__Calditrichales	f__Calditrichaceae	g__JdFR-76	s__uncultured_bacterium_g__JdFR-76	OTU4493	8	10	10	0	1	0	0	4	5	6	0	1	0	4	6	110	59	1	3	2	1	2	1	0	0	2	14	250
d__Bacteria	k__norank_d__Bacteria	p__Calditrichaeota	c__Calditrichia	o__Calditrichales	f__Calditrichaceae	g__JdFR-76	s__uncultured_bacterium_g__JdFR-76	OTU4464	126	9	0	0	3	2	0	3	2	0	3	2	0	13	1	131	590	1	1	4	1	2	14	0	2	6	5	921
d__Bacteria	k__norank_d__Bacteria	p__Calditrichaeota	c__Calditrichia	o__Calditrichales	f__Calditrichaceae	g__JdFR-76	s__uncultured_bacterium_g__JdFR-76	OTU4442	96	7	0	0	7	3	0	9	13	3	6	1	0	11	6	383	576	1	1	12	2	6	24	2	5	9	26	1209
d__Bacteria	k__norank_d__Bacteria	p__Proteobacteria	c__Gammaproteobacteria	o__Acidithiobacillales	f__Acidithiobacillaceae	g__KCM-B-112	s__uncultured_bacterium_g__KCM-B-112	OTU4346	0	0	0	1	0	4	0	0	0	0	1	0	0	0	0	0	25	4	0	0	0	0	0	0	0	0	3	38
d__Bacteria	k__norank_d__Bacteria	p__Proteobacteria	c__Alphaproteobacteria	o__Rhizobiales	f__Kaistiaceae	g__Kaistia	s__uncultured_bacterium_g__Kaistia	OTU671	2	0	1	6	14	4	2	2	6	4	11	25	9	3	35	3	4	8	3	3	1	18	23	3	12	13	4	219
d__Bacteria	k__norank_d__Bacteria	p__Actinobacteria	c__Actinobacteria	o__Micrococcales	f__Intrasporangiaceae	g__Knoellia	s__uncultured_bacterium_g__Knoellia	OTU1020	73	73	37	67	99	103	45	30	62	71	126	123	101	81	115	131	42	169	158	69	70	92	259	121	135	82	98	2632
d__Bacteria	k__norank_d__Bacteria	p__Proteobacteria	c__Gammaproteobacteria	o__Cardiobacteriales	f__Wohlfahrtiimonadaceae	g__Koukoulia	s__Koukoulia_aurantiaca	OTU2125	153	9	884	0	0	1	5	0	1	0	1	0	0	0	1	1	2	0	2	1	0	0	0	2	0	0	0	1063
d__Bacteria	k__norank_d__Bacteria	p__Bacteroidetes	c__Bacteroidia	o__Chitinophagales	f__Chitinophagaceae	g__Lacibacter	s__uncultured_bacterium_g__Lacibacter	OTU223	0	0	0	0	1	0	0	1	4	1	0	3	0	0	6	3	0	2	1	1	0	0	1	0	1	0	1	26
d__Bacteria	k__norank_d__Bacteria	p__Firmicutes	c__Bacilli	o__Lactobacillales	f__Streptococcaceae	g__Lactococcus	s__unclassified_g__Lactococcus	OTU4197	0	1	1	1	0	3	1	0	1	0	2	1	3	2	4	5	1	3	1	1	1	2	4	0	2	0	0	40
d__Bacteria	k__norank_d__Bacteria	p__Firmicutes	c__Bacilli	o__Lactobacillales	f__Streptococcaceae	g__Lactococcus	s__Lactococcus_lactis	OTU2132	49	89	41	6	33	32	17	14	31	29	43	14	21	44	48	93	103	86	21	56	6	24	16	51	55	47	34	1103
d__Bacteria	k__norank_d__Bacteria	p__Firmicutes	c__Bacilli	o__Lactobacillales	f__Streptococcaceae	g__Lactococcus	s__Lactococcus_piscium	OTU4431	174	184	142	35	86	136	53	66	82	135	110	32	68	97	153	244	295	236	62	90	22	76	85	133	173	169	129	3267
d__Bacteria	k__norank_d__Bacteria	p__Verrucomicrobia	c__Verrucomicrobiae	o__Opitutales	f__Opitutaceae	g__Lacunisphaera	s__unclassified_g__Lacunisphaera	OTU2254	5	4	2	0	1	0	2	2	0	2	3	0	0	9	2	0	0	19	1	5	0	8	0	1	4	2	3	75
d__Bacteria	k__norank_d__Bacteria	p__Verrucomicrobia	c__Verrucomicrobiae	o__Opitutales	f__Opitutaceae	g__Lacunisphaera	s__metagenome_g__Lacunisphaera	OTU3886	1	0	0	1	0	1	9	1	1	2	0	1	5	0	0	2	1	8	3	0	5	7	1	2	2	0	2	55
d__Bacteria	k__norank_d__Bacteria	p__Verrucomicrobia	c__Verrucomicrobiae	o__Opitutales	f__Opitutaceae	g__Lacunisphaera	s__uncultured_Verrucomicrobia_bacterium_g__Lacunisphaera	OTU2783	7	3	7	1	4	11	2	4	2	4	9	3	1	16	12	2	1	5	6	5	6	31	10	2	13	2	5	174
d__Bacteria	k__norank_d__Bacteria	p__Verrucomicrobia	c__Verrucomicrobiae	o__Opitutales	f__Opitutaceae	g__Lacunisphaera	s__unclassified_g__Lacunisphaera	OTU3972	2	2	0	1	7	3	4	0	2	0	11	6	2	0	17	5	0	2	2	0	1	22	1	0	3	7	3	103
d__Bacteria	k__norank_d__Bacteria	p__Proteobacteria	c__Gammaproteobacteria	o__Betaproteobacteriales	f__Burkholderiaceae	g__Lautropia	s__unclassified_g__Lautropia	OTU990	4	4	1	1	4	2	2	1	4	0	10	9	2	10	10	3	1	1	1	2	0	5	4	3	10	4	1	99
d__Bacteria	k__norank_d__Bacteria	p__Actinobacteria	c__Actinobacteria	o__Pseudonocardiales	f__Pseudonocardiaceae	g__Lechevalieria	s__unclassified_g__Lechevalieria	OTU751	3	0	1	1	0	8	0	0	0	0	1	5	0	0	5	0	0	2	5	1	1	4	2	1	0	1	1	42
d__Bacteria	k__norank_d__Bacteria	p__Proteobacteria	c__Gammaproteobacteria	o__Legionellales	f__Legionellaceae	g__Legionella	s__unclassified_g__Legionella	OTU3433	0	0	0	4	1	6	1	1	2	2	2	6	2	3	6	5	0	0	3	1	1	2	2	5	4	3	1	63
d__Bacteria	k__norank_d__Bacteria	p__Proteobacteria	c__Gammaproteobacteria	o__Legionellales	f__Legionellaceae	g__Legionella	s__unclassified_g__Legionella	OTU3994	6	4	3	2	3	7	1	4	5	1	6	1	6	5	9	2	0	10	4	2	0	5	4	5	9	1	6	111
d__Bacteria	k__norank_d__Bacteria	p__Proteobacteria	c__Gammaproteobacteria	o__Legionellales	f__Legionellaceae	g__Legionella	s__Legionella_fallonii_LLAP-10	OTU3181	0	2	2	0	0	0	0	1	1	2	1	17	2	3	21	2	1	0	12	2	0	6	5	1	5	3	3	92
d__Bacteria	k__norank_d__Bacteria	p__Cyanobacteria	c__Oxyphotobacteria	o__Oxyphotobacteria_Incertae_Sedis	f__unclassified_o__Oxyphotobacteria_Incertae_Sedis	g__Leptolyngbya_ANT.L52.2	s__uncultured_bacterium_g__Leptolyngbya_ANT.L52.2	OTU2955	4	8	2	1	1	5	6	7	3	4	12	6	26	4	4	3	4	5	6	2	3	19	3	2	16	11	3	170
d__Bacteria	k__norank_d__Bacteria	p__Cyanobacteria	c__Oxyphotobacteria	o__Oxyphotobacteria_Incertae_Sedis	f__unclassified_o__Oxyphotobacteria_Incertae_Sedis	g__Leptolyngbya_ANT.L52.2	s__unclassified_g__Leptolyngbya_ANT.L52.2	OTU3213	32	29	18	6	22	7	23	26	16	8	25	10	36	43	47	25	7	17	21	28	4	22	26	25	52	20	15	610
d__Bacteria	k__norank_d__Bacteria	p__Actinobacteria	c__Actinobacteria	o__Micrococcales	f__Microbacteriaceae	g__Leucobacter	s__uncultured_actinobacterium_g__Leucobacter	OTU2777	2	2	0	1	8	3	0	0	3	3	13	2	1	2	8	0	0	0	1	1	0	6	0	2	3	0	0	61
d__Bacteria	k__norank_d__Bacteria	p__Firmicutes	c__Bacilli	o__Lactobacillales	f__Leuconostocaceae	g__Leuconostoc	s__unclassified_g__Leuconostoc	OTU4610	2	13	6	0	4	2	2	0	2	1	4	0	0	5	3	5	6	4	1	6	0	3	0	5	2	2	2	80
d__Bacteria	k__norank_d__Bacteria	p__Proteobacteria	c__Gammaproteobacteria	o__Betaproteobacteriales	f__Burkholderiaceae	g__Limnobacter	s__unclassified_g__Limnobacter	OTU708	0	2	4	1	1	1	26	9	74	268	17	9	9	6	11	2	1	4	7	8	2	12	45	178	4	3	16	720
d__Bacteria	k__norank_d__Bacteria	p__Proteobacteria	c__Gammaproteobacteria	o__Betaproteobacteriales	f__Burkholderiaceae	g__Limnobacter	s__unclassified_g__Limnobacter	OTU411	11	9	22	3	19	5	4	11	13	17	78	23	6	17	16	5	6	6	6	19	3	14	7	19	19	57	10	425
d__Bacteria	k__norank_d__Bacteria	p__Chloroflexi	c__Anaerolineae	o__Caldilineales	f__Caldilineaceae	g__Litorilinea	s__uncultured_soil_bacterium_g__Litorilinea	OTU3850	2	5	4	0	5	1	1	0	2	2	4	7	1	7	11	10	14	1	1	1	0	4	4	0	5	3	4	99
d__Bacteria	k__norank_d__Bacteria	p__Proteobacteria	c__Gammaproteobacteria	o__Xanthomonadales	f__Rhodanobacteraceae	g__Luteibacter	s__uncultured_bacterium_g__Luteibacter	OTU3932	11	4	23	10	3	68	74	6	4	21	0	1	33	2	0	4	6	71	16	5	146	11	6	3	0	4	250	782
d__Bacteria	k__norank_d__Bacteria	p__Proteobacteria	c__Gammaproteobacteria	o__Xanthomonadales	f__Xanthomonadaceae	g__Luteimonas	s__unclassified_g__Luteimonas	OTU3074	1	0	0	6	8	8	3	6	2	7	4	11	4	5	3	2	1	1	13	5	5	7	16	5	2	8	4	137
d__Bacteria	k__norank_d__Bacteria	p__Proteobacteria	c__Gammaproteobacteria	o__Xanthomonadales	f__Xanthomonadaceae	g__Luteimonas	s__Lysobacter_pocheonensis	OTU1910	18	5	11	101	32	52	65	34	36	62	28	52	72	38	27	21	8	25	56	25	39	27	68	41	8	39	64	1054
d__Bacteria	k__norank_d__Bacteria	p__Proteobacteria	c__Gammaproteobacteria	o__Xanthomonadales	f__Xanthomonadaceae	g__Luteimonas	s__unclassified_g__Luteimonas	OTU2970	7	5	6	3	9	5	0	23	21	2	7	5	0	14	8	1	0	0	5	14	1	1	9	4	1	12	3	166
d__Bacteria	k__norank_d__Bacteria	p__Proteobacteria	c__Gammaproteobacteria	o__Xanthomonadales	f__Xanthomonadaceae	g__Luteimonas	s__unclassified_g__Luteimonas	OTU3923	154	58	373	704	127	367	268	593	353	378	103	159	247	129	100	93	27	73	479	179	237	120	250	266	54	293	253	6437
d__Bacteria	k__norank_d__Bacteria	p__Proteobacteria	c__Gammaproteobacteria	o__Xanthomonadales	f__Xanthomonadaceae	g__Luteimonas	s__Lysobacter_pocheonensis	OTU3647	334	171	458	2738	378	1166	1080	2869	989	1389	474	680	1288	693	382	349	78	355	1688	868	1044	525	1169	1023	338	1291	1099	24916
d__Bacteria	k__norank_d__Bacteria	p__Proteobacteria	c__Gammaproteobacteria	o__Xanthomonadales	f__Xanthomonadaceae	g__Luteimonas	s__unclassified_g__Luteimonas	OTU3421	1	1	1	1	1	0	1	5	3	8	1	2	5	1	0	2	0	0	2	2	1	0	0	2	2	4	2	48
d__Bacteria	k__norank_d__Bacteria	p__Firmicutes	c__Bacilli	o__Bacillales	f__Planococcaceae	g__Lysinibacillus	s__Lysinibacillus_macroides_g__Lysinibacillus	OTU3467	7	6	6	5	6	8	3	1	5	4	8	2	10	7	5	5	3	11	5	2	1	6	4	4	6	6	0	136
d__Bacteria	k__norank_d__Bacteria	p__Proteobacteria	c__Gammaproteobacteria	o__Xanthomonadales	f__Xanthomonadaceae	g__Lysobacter	s__unclassified_g__Lysobacter	OTU253	104	125	130	1126	342	434	195	352	656	199	350	392	155	198	433	111	70	122	345	229	73	96	324	555	153	549	245	8063
d__Bacteria	k__norank_d__Bacteria	p__Proteobacteria	c__Gammaproteobacteria	o__Xanthomonadales	f__Xanthomonadaceae	g__Lysobacter	s__unclassified_g__Lysobacter	OTU3986	50	23	144	89	23	99	33	28	60	58	13	48	22	19	47	45	17	20	86	16	18	12	12	44	19	35	60	1140
d__Bacteria	k__norank_d__Bacteria	p__Proteobacteria	c__Gammaproteobacteria	o__Xanthomonadales	f__Xanthomonadaceae	g__Lysobacter	s__Lysobacter_erysipheiresistens	OTU3920	24	25	21	181	96	231	70	47	200	265	103	142	245	23	257	81	33	84	112	58	45	30	134	362	42	148	398	3457
d__Bacteria	k__norank_d__Bacteria	p__Proteobacteria	c__Gammaproteobacteria	o__Xanthomonadales	f__Xanthomonadaceae	g__Lysobacter	s__uncultured_Lysobacter_sp._g__Lysobacter	OTU3974	43	29	68	10	5	20	10	29	34	17	7	20	8	9	13	8	6	4	15	18	3	1	12	37	1	20	22	469
d__Bacteria	k__norank_d__Bacteria	p__Proteobacteria	c__Gammaproteobacteria	o__Xanthomonadales	f__Xanthomonadaceae	g__Lysobacter	s__unclassified_g__Lysobacter	OTU3127	6	0	4	2	2	2	0	1	6	6	3	0	0	2	3	5	17	0	0	2	0	1	5	5	0	4	6	82
d__Bacteria	k__norank_d__Bacteria	p__Proteobacteria	c__Gammaproteobacteria	o__Xanthomonadales	f__Xanthomonadaceae	g__Lysobacter	s__unclassified_g__Lysobacter	OTU321	179	173	482	825	290	923	328	436	1464	829	444	387	345	300	1076	158	122	441	837	359	183	369	434	758	370	679	742	13933
d__Bacteria	k__norank_d__Bacteria	p__Proteobacteria	c__Gammaproteobacteria	o__Xanthomonadales	f__Xanthomonadaceae	g__Lysobacter	s__unclassified_g__Lysobacter	OTU3939	57	55	112	575	167	434	232	202	424	330	206	219	197	87	308	96	50	213	434	112	101	132	201	346	85	257	205	5837
d__Bacteria	k__norank_d__Bacteria	p__Proteobacteria	c__Gammaproteobacteria	o__Betaproteobacteriales	f__Nitrosomonadaceae	g__MND1	s__unclassified_g__MND1	OTU3220	98	131	87	42	38	80	86	77	58	75	72	32	41	128	32	281	229	88	55	84	64	145	43	44	84	57	69	2320
d__Bacteria	k__norank_d__Bacteria	p__Proteobacteria	c__Gammaproteobacteria	o__Betaproteobacteriales	f__Nitrosomonadaceae	g__MND1	s__unclassified_g__MND1	OTU2859	19	37	5	1	8	6	2	9	11	4	3	10	4	7	5	58	63	2	1	11	0	7	6	4	3	8	11	305
d__Bacteria	k__norank_d__Bacteria	p__Proteobacteria	c__Gammaproteobacteria	o__Betaproteobacteriales	f__Nitrosomonadaceae	g__MND1	s__unclassified_g__MND1	OTU373	103	263	58	9	134	21	2	129	406	51	101	34	9	152	36	112	173	10	4	142	4	10	84	16	13	127	18	2221
d__Bacteria	k__norank_d__Bacteria	p__Proteobacteria	c__Gammaproteobacteria	o__Betaproteobacteriales	f__Nitrosomonadaceae	g__MND1	s__metagenome_g__MND1	OTU794	4	7	15	1	2	6	4	5	3	1	13	5	1	30	4	2	1	6	5	7	1	8	8	0	5	6	9	159
d__Bacteria	k__norank_d__Bacteria	p__Proteobacteria	c__Gammaproteobacteria	o__Betaproteobacteriales	f__Nitrosomonadaceae	g__MND1	s__unclassified_g__MND1	OTU2701	12	2	13	2	3	5	38	1	2	14	6	1	23	36	1	7	0	47	20	16	38	16	4	1	24	19	10	361
d__Bacteria	k__norank_d__Bacteria	p__Proteobacteria	c__Gammaproteobacteria	o__Betaproteobacteriales	f__Nitrosomonadaceae	g__MND1	s__uncultured_beta_proteobacterium_g__MND1	OTU4486	101	31	10	8	38	13	2	19	54	13	29	12	7	59	15	311	1024	4	4	40	5	16	36	5	4	29	32	1921
d__Bacteria	k__norank_d__Bacteria	p__Proteobacteria	c__Gammaproteobacteria	o__Betaproteobacteriales	f__Nitrosomonadaceae	g__MND1	s__uncultured_Burkholderiales_bacterium_g__MND1	OTU3206	203	266	248	54	106	130	87	130	137	161	147	81	76	152	118	194	404	63	47	157	49	134	122	107	106	114	143	3736
d__Bacteria	k__norank_d__Bacteria	p__Proteobacteria	c__Gammaproteobacteria	o__Betaproteobacteriales	f__Nitrosomonadaceae	g__MND1	s__uncultured_Burkholderiales_bacterium_g__MND1	OTU3931	226	398	214	43	169	95	10	188	231	106	156	109	38	190	150	556	734	29	26	151	24	95	152	69	58	97	165	4479
d__Bacteria	k__norank_d__Bacteria	p__Proteobacteria	c__Gammaproteobacteria	o__Betaproteobacteriales	f__Nitrosomonadaceae	g__MND1	s__unclassified_g__MND1	OTU3086	49	84	23	18	29	50	32	94	49	55	50	18	26	82	21	28	19	36	29	88	66	133	34	15	58	34	45	1265
d__Bacteria	k__norank_d__Bacteria	p__Proteobacteria	c__Gammaproteobacteria	o__Betaproteobacteriales	f__Nitrosomonadaceae	g__MND1	s__unclassified_g__MND1	OTU4278	4	4	20	5	2	7	21	6	8	25	7	3	9	5	2	16	16	29	11	5	19	28	4	9	12	1	6	284
d__Bacteria	k__norank_d__Bacteria	p__Proteobacteria	c__Gammaproteobacteria	o__Betaproteobacteriales	f__Nitrosomonadaceae	g__MND1	s__unclassified_g__MND1	OTU3055	3	3	2	0	1	1	1	4	2	0	1	0	1	2	1	0	1	0	1	9	0	0	2	1	0	1	0	37
d__Bacteria	k__norank_d__Bacteria	p__Proteobacteria	c__Gammaproteobacteria	o__Betaproteobacteriales	f__Nitrosomonadaceae	g__MND1	s__unclassified_g__MND1	OTU4029	129	170	129	29	38	56	73	54	34	51	90	56	93	114	55	22	35	137	50	129	35	92	57	92	143	77	52	2092
d__Bacteria	k__norank_d__Bacteria	p__Proteobacteria	c__Gammaproteobacteria	o__Betaproteobacteriales	f__Nitrosomonadaceae	g__MND1	s__unclassified_g__MND1	OTU2741	8	1	5	0	5	1	5	6	4	3	1	1	1	3	1	25	19	2	7	3	5	33	2	2	6	0	6	155
d__Bacteria	k__norank_d__Bacteria	p__Proteobacteria	c__Gammaproteobacteria	o__Betaproteobacteriales	f__Nitrosomonadaceae	g__MND1	s__unclassified_g__MND1	OTU1216	35	96	34	5	36	37	6	64	56	33	28	15	7	59	38	56	91	4	5	33	12	23	32	7	8	27	32	879
d__Bacteria	k__norank_d__Bacteria	p__Proteobacteria	c__Gammaproteobacteria	o__Betaproteobacteriales	f__Nitrosomonadaceae	g__MND1	s__unclassified_g__MND1	OTU2790	8	11	12	6	0	7	4	4	4	5	2	0	10	5	0	42	24	7	3	7	6	23	2	2	4	3	5	206
d__Bacteria	k__norank_d__Bacteria	p__Bacteroidetes	c__Bacteroidia	o__Flavobacteriales	f__Flavobacteriaceae	g__Mariniflexile	s__unclassified_g__Mariniflexile	OTU1075	1	0	0	0	6	0	0	1	8	0	7	7	0	2	4	0	3	0	3	7	0	0	1	2	3	4	2	61
d__Bacteria	k__norank_d__Bacteria	p__Proteobacteria	c__Gammaproteobacteria	o__Alteromonadales	f__Marinobacteraceae	g__Marinobacter	s__unclassified_g__Marinobacter	OTU1332	43	12	21	5	88	1	2	2	6	2	38	11	25	10	8	11	1	4	3	8	0	1	2	10	6	22	9	351
d__Bacteria	k__norank_d__Bacteria	p__Bacteroidetes	c__Bacteroidia	o__Cytophagales	f__Cyclobacteriaceae	g__Marinoscillum	s__unclassified_g__Marinoscillum	OTU1110	5	3	1	1	0	3	0	0	0	3	4	1	1	22	1	0	0	0	1	5	0	4	1	1	5	10	5	77
d__Bacteria	k__norank_d__Bacteria	p__Bacteroidetes	c__Bacteroidia	o__Cytophagales	f__Cyclobacteriaceae	g__Marivirga	s__unclassified_g__Marivirga	OTU1375	0	0	0	0	10	0	0	0	2	0	0	0	6	0	0	0	0	1	1	0	0	0	0	2	2	4	1	29
d__Bacteria	k__norank_d__Bacteria	p__Actinobacteria	c__Actinobacteria	o__Propionibacteriales	f__Nocardioidaceae	g__Marmoricola	s__uncultured_bacterium_g__Marmoricola	OTU3510	63	81	28	24	138	59	21	8	26	21	164	233	62	138	44	127	45	166	36	76	17	119	179	96	132	27	33	2163
d__Bacteria	k__norank_d__Bacteria	p__Proteobacteria	c__Gammaproteobacteria	o__Betaproteobacteriales	f__Burkholderiaceae	g__Massilia	s__unclassified_g__Massilia	OTU1493	5	3	4	2	11	42	10	2	18	13	18	13	8	3	13	37	16	177	30	10	5	52	17	37	14	13	4	577
d__Bacteria	k__norank_d__Bacteria	p__Proteobacteria	c__Gammaproteobacteria	o__Betaproteobacteriales	f__Burkholderiaceae	g__Massilia	s__unclassified_g__Massilia	OTU1274	1	1	1	1	36	57	14	13	21	9	19	34	15	2	16	24	22	251	44	19	11	105	42	45	17	3	2	825
d__Bacteria	k__norank_d__Bacteria	p__Proteobacteria	c__Alphaproteobacteria	o__Rhizobiales	f__Rhizobiaceae	g__Mesorhizobium	s__unclassified_g__Mesorhizobium	OTU422	3	3	2	1	16	0	0	0	0	0	21	21	3	8	14	7	1	7	3	8	0	18	5	5	12	1	1	160
d__Bacteria	k__norank_d__Bacteria	p__Proteobacteria	c__Gammaproteobacteria	o__Betaproteobacteriales	f__Methylophilaceae	g__Methylobacillus	s__uncultured_bacterium_g__Methylobacillus	OTU2848	11	6	0	5	13	12	3	5	8	2	28	19	11	13	8	7	4	6	8	9	8	17	18	10	10	14	4	259
d__Bacteria	k__norank_d__Bacteria	p__Proteobacteria	c__Gammaproteobacteria	o__Nitrosococcales	f__Methylophagaceae	g__Methylophaga	s__unclassified_g__Methylophaga	OTU3303	1	11	1	0	1	0	0	1	0	0	0	0	0	0	0	0	0	0	0	3	0	0	1	4	0	20	0	43
d__Bacteria	k__norank_d__Bacteria	p__Proteobacteria	c__Gammaproteobacteria	o__Nitrosococcales	f__Methylophagaceae	g__Methylophaga	s__uncultured_gamma_proteobacterium_g__Methylophaga	OTU3323	94	33	53	34	33	7	1	14	14	0	21	15	11	10	10	8	3	5	6	11	3	4	9	14	13	52	7	485
d__Bacteria	k__norank_d__Bacteria	p__Proteobacteria	c__Gammaproteobacteria	o__Betaproteobacteriales	f__Methylophilaceae	g__Methylotenera	s__uncultured_bacterium_g__Methylotenera	OTU4557	5	2	0	1	12	4	4	0	5	9	0	0	1	0	8	23	3	28	4	6	3	7	3	5	9	7	0	149
d__Bacteria	k__norank_d__Bacteria	p__Actinobacteria	c__Actinobacteria	o__Micrococcales	f__Microbacteriaceae	g__Microbacterium	s__unclassified_g__Microbacterium	OTU3657	48	21	13	28	122	21	10	6	14	9	109	182	20	30	41	109	22	67	36	51	20	64	92	65	62	22	19	1303
d__Bacteria	k__norank_d__Bacteria	p__Proteobacteria	c__Gammaproteobacteria	o__Cellvibrionales	f__Microbulbiferaceae	g__Microbulbifer	s__unclassified_g__Microbulbifer	OTU3838	8	18	4	3	22	3	0	2	23	0	49	21	1	9	13	1	12	6	0	8	1	3	18	36	16	19	4	300
d__Bacteria	k__norank_d__Bacteria	p__Cyanobacteria	c__Oxyphotobacteria	o__Nostocales	f__Coleofasciculaceae	g__Microcoleus_Es-Yyy1400	s__uncultured_Microcoleus_sp._g__Microcoleus_Es-Yyy1400	OTU3702	2	5	1	6	108	25	4	1	34	2	41	8	7	46	69	30	12	2	1	7	5	55	15	51	116	119	12	784
d__Bacteria	k__norank_d__Bacteria	p__Actinobacteria	c__Actinobacteria	o__Propionibacteriales	f__Propionibacteriaceae	g__Microlunatus	s__unclassified_g__Microlunatus	OTU3364	1	10	2	1	2	6	1	0	2	0	4	2	1	2	5	2	1	0	3	3	3	4	6	8	3	4	4	80
d__Bacteria	k__norank_d__Bacteria	p__Actinobacteria	c__Actinobacteria	o__Micromonosporales	f__Micromonosporaceae	g__Micromonospora	s__Micromonospora_chersina	OTU1449	1	1	0	0	2	1	0	0	0	0	1	2	0	3	0	0	1	5	0	0	0	2	0	0	3	0	0	22
d__Bacteria	k__norank_d__Bacteria	p__Proteobacteria	c__Alphaproteobacteria	o__Micropepsales	f__Micropepsaceae	g__Micropepsis	s__uncultured_bacterium_g__Micropepsis	OTU2567	3	0	1	2	2	1	5	0	0	4	1	0	3	0	0	4	0	12	5	3	2	12	0	3	6	1	1	71
d__Bacteria	k__norank_d__Bacteria	p__Proteobacteria	c__Alphaproteobacteria	o__Rhizobiales	f__Beijerinckiaceae	g__Microvirga	s__unclassified_g__Microvirga	OTU2064	8	1	3	3	12	12	0	0	4	2	11	13	3	11	19	6	8	7	9	7	1	8	11	4	19	5	2	189
d__Bacteria	k__norank_d__Bacteria	p__Proteobacteria	c__Alphaproteobacteria	o__Rhizobiales	f__Beijerinckiaceae	g__Microvirga	s__uncultured_bacterium_g__Microvirga	OTU1487	7	8	4	6	21	10	5	3	4	3	22	19	12	18	11	11	3	19	4	11	3	14	14	17	28	9	3	289
d__Bacteria	k__norank_d__Bacteria	p__Proteobacteria	c__Gammaproteobacteria	o__Xanthomonadales	f__Rhodanobacteraceae	g__Mizugakiibacter	s__uncultured_Xanthomonadaceae_bacterium_g__Mizugakiibacter	OTU3945	25	17	56	32	1	87	275	49	27	70	4	5	93	14	4	6	3	88	137	28	168	14	12	19	9	40	82	1365
d__Bacteria	k__norank_d__Bacteria	p__Bacteroidetes	c__Bacteroidia	o__Sphingobacteriales	f__Sphingobacteriaceae	g__Mucilaginibacter	s__metagenome_g__Mucilaginibacter	OTU1183	0	0	0	0	0	0	0	0	0	6	0	1	7	1	2	2	0	0	3	0	4	2	1	1	0	0	1	31
d__Bacteria	k__norank_d__Bacteria	p__Bacteroidetes	c__Bacteroidia	o__Flavobacteriales	f__Flavobacteriaceae	g__Muricauda	s__uncultured_bacterium_g__Muricauda	OTU1412	1	2	0	24	61	5	1	1	40	0	13	13	5	7	53	16	5	0	5	4	0	73	5	11	41	49	5	440
d__Bacteria	k__norank_d__Bacteria	p__Actinobacteria	c__Actinobacteria	o__Corynebacteriales	f__Mycobacteriaceae	g__Mycobacterium	s__unclassified_g__Mycobacterium	OTU269	2	3	5	0	2	5	0	1	4	2	7	6	2	4	2	4	1	6	1	7	1	3	10	5	1	2	3	89
d__Bacteria	k__norank_d__Bacteria	p__Actinobacteria	c__Actinobacteria	o__Corynebacteriales	f__Mycobacteriaceae	g__Mycobacterium	s__unclassified_g__Mycobacterium	OTU3508	21	27	9	3	16	12	9	4	9	12	22	25	24	26	27	33	24	11	18	14	5	18	36	16	31	20	14	486
d__Bacteria	k__norank_d__Bacteria	p__Bacteroidetes	c__Bacteroidia	o__Flavobacteriales	f__Flavobacteriaceae	g__Myroides	s__Myroides_profundi	OTU1649	338	22	438	0	4	3	0	0	0	0	1	0	2	0	0	1	0	0	1	0	0	0	0	1	0	1	0	812
d__Bacteria	k__norank_d__Bacteria	p__Bacteroidetes	c__Bacteroidia	o__Flavobacteriales	f__Flavobacteriaceae	g__Myroides	s__Myroides_odoratus	OTU1551	142	17	364	11	18	22	1	5	6	0	9	2	5	1	3	25	3	2	1	4	1	2	3	10	0	8	0	665
d__Bacteria	k__norank_d__Bacteria	p__Bacteroidetes	c__Bacteroidia	o__Flavobacteriales	f__Flavobacteriaceae	g__Myroides	s__unclassified_g__Myroides	OTU3844	52	73	41	5	34	54	24	26	28	26	32	17	27	53	43	82	81	77	14	30	5	31	23	26	65	42	12	1023
d__Bacteria	k__norank_d__Bacteria	p__Proteobacteria	c__Deltaproteobacteria	o__Myxococcales	f__Nannocystaceae	g__Nannocystis	s__unclassified_g__Nannocystis	OTU968	6	1	0	0	2	0	1	0	0	1	8	0	1	5	11	0	2	0	0	2	0	4	0	0	2	1	0	47
d__Bacteria	k__norank_d__Bacteria	p__Proteobacteria	c__Deltaproteobacteria	o__Myxococcales	f__Nannocystaceae	g__Nannocystis	s__unclassified_g__Nannocystis	OTU4107	1	0	0	0	1	0	0	0	0	0	2	0	0	2	1	5	1	0	1	0	0	6	0	0	5	0	1	26
d__Bacteria	k__norank_d__Bacteria	p__Proteobacteria	c__Deltaproteobacteria	o__Myxococcales	f__Nannocystaceae	g__Nannocystis	s__Nannocystis_pusilla	OTU3203	0	4	3	33	77	26	1	8	13	3	25	34	1	6	20	5	5	2	14	21	5	11	14	10	15	4	1	361
d__Bacteria	k__norank_d__Bacteria	p__Bacteroidetes	c__Bacteroidia	o__Chitinophagales	f__Chitinophagaceae	g__Niastella	s__Niastella_populi	OTU2784	2	4	0	3	7	0	4	1	3	2	0	1	0	7	7	1	0	0	2	2	5	3	2	0	0	2	2	60
d__Bacteria	k__norank_d__Bacteria	p__Bacteroidetes	c__Bacteroidia	o__Chitinophagales	f__Chitinophagaceae	g__Niastella	s__unclassified_g__Niastella	OTU16	3	0	3	4	2	4	13	3	1	3	2	1	0	5	3	5	1	3	4	2	4	7	3	5	4	1	1	87
d__Bacteria	k__norank_d__Bacteria	p__Bacteroidetes	c__Bacteroidia	o__Chitinophagales	f__Chitinophagaceae	g__Niastella	s__uncultured_bacterium_g__Niastella	OTU2313	4	4	0	4	2	0	3	6	2	6	2	2	2	2	3	2	0	2	2	5	0	7	2	2	1	3	4	72
d__Bacteria	k__norank_d__Bacteria	p__Chloroflexi	c__Chloroflexia	o__Thermomicrobiales	f__Thermomicrobiaceae	g__Nitrolancea	s__uncultured_bacterium_g__Nitrolancea	OTU384	1	0	0	0	0	1	1	0	0	1	3	4	1	6	0	0	1	16	1	12	5	2	2	0	2	2	0	61
d__Bacteria	k__norank_d__Bacteria	p__Chloroflexi	c__Chloroflexia	o__Thermomicrobiales	f__Thermomicrobiaceae	g__Nitrolancea	s__uncultured_bacterium_g__Nitrolancea	OTU64	0	0	2	2	0	3	7	0	1	2	1	1	1	1	1	0	0	11	1	3	5	1	0	1	3	0	1	48
d__Bacteria	k__norank_d__Bacteria	p__Proteobacteria	c__Gammaproteobacteria	o__Betaproteobacteriales	f__Nitrosomonadaceae	g__Nitrosomonas	s__Nitrosomonas_communis	OTU3949	2	5	4	0	6	2	0	3	9	2	0	4	0	5	11	0	1	0	0	6	0	2	3	5	4	8	1	83
d__Bacteria	k__norank_d__Bacteria	p__Proteobacteria	c__Gammaproteobacteria	o__Betaproteobacteriales	f__Nitrosomonadaceae	g__Nitrosomonas	s__Nitrosomonas_nitrosa	OTU3464	8	6	3	3	3	6	2	5	11	4	5	9	0	12	11	1	2	3	0	5	0	9	6	6	5	13	2	140
d__Bacteria	k__norank_d__Bacteria	p__Proteobacteria	c__Gammaproteobacteria	o__Betaproteobacteriales	f__Nitrosomonadaceae	g__Nitrosomonas	s__unclassified_g__Nitrosomonas	OTU2253	0	0	0	0	7	0	0	0	6	1	2	3	0	1	6	0	0	0	1	1	0	0	0	0	0	2	0	30
d__Bacteria	k__norank_d__Bacteria	p__Proteobacteria	c__Gammaproteobacteria	o__Betaproteobacteriales	f__Nitrosomonadaceae	g__Nitrosospira	s__unclassified_g__Nitrosospira	OTU2618	18	16	21	12	40	45	19	18	29	12	36	49	17	37	39	11	9	60	10	33	10	57	33	29	43	24	15	742
d__Bacteria	k__norank_d__Bacteria	p__Nitrospirae	c__Nitrospira	o__norank_c__Nitrospira	f__norank_c__Nitrospira	g__Nitrospira	s__Nitrospira_sp._enrichment_culture_clone_80	OTU631	22	26	12	2	16	8	9	1	7	6	19	25	11	21	32	9	1	12	5	12	2	33	23	24	34	14	5	391
d__Bacteria	k__norank_d__Bacteria	p__Nitrospirae	c__Nitrospira	o__norank_c__Nitrospira	f__norank_c__Nitrospira	g__Nitrospira	s__unclassified_g__Nitrospira	OTU1406	6	2	4	0	32	2	1	2	8	0	32	23	2	24	37	2	8	0	2	10	0	7	12	1	13	10	1	241
d__Bacteria	k__norank_d__Bacteria	p__Nitrospirae	c__Nitrospira	o__norank_c__Nitrospira	f__norank_c__Nitrospira	g__Nitrospira	s__uncultured_soil_bacterium_g__Nitrospira	OTU3569	28	41	9	2	51	13	1	6	6	3	33	19	13	46	27	62	39	22	6	26	6	48	18	13	51	9	15	613
d__Bacteria	k__norank_d__Bacteria	p__Nitrospirae	c__Nitrospira	o__norank_c__Nitrospira	f__norank_c__Nitrospira	g__Nitrospira	s__uncultured_soil_bacterium_g__Nitrospira	OTU4616	38	26	17	6	42	9	8	2	6	9	30	30	15	54	29	56	41	46	8	37	4	84	16	22	119	7	20	781
d__Bacteria	k__norank_d__Bacteria	p__Nitrospirae	c__Nitrospira	o__norank_c__Nitrospira	f__norank_c__Nitrospira	g__Nitrospira	s__Nitrospirae_bacterium_RIFCSPHIGHO2_01_FULL_66_17	OTU1220	45	1	1	1	0	0	0	0	1	1	0	0	0	1	0	250	175	0	0	0	0	2	9	0	1	0	1	489
d__Bacteria	k__norank_d__Bacteria	p__Nitrospirae	c__Nitrospira	o__norank_c__Nitrospira	f__norank_c__Nitrospira	g__Nitrospira	s__unclassified_g__Nitrospira	OTU2350	2	3	2	0	10	5	0	1	0	0	6	4	3	2	8	17	6	2	1	2	0	2	6	3	3	6	4	98
d__Bacteria	k__norank_d__Bacteria	p__Nitrospirae	c__Nitrospira	o__norank_c__Nitrospira	f__norank_c__Nitrospira	g__Nitrospira	s__unclassified_g__Nitrospira	OTU4375	4	0	0	0	0	0	0	0	0	0	0	0	0	0	2	41	27	0	0	0	1	4	0	0	1	0	1	81
d__Bacteria	k__norank_d__Bacteria	p__Nitrospirae	c__Nitrospira	o__norank_c__Nitrospira	f__norank_c__Nitrospira	g__Nitrospira	s__uncultured_Nitrospirales_bacterium_g__Nitrospira	OTU4600	0	0	0	1	2	1	0	1	1	3	4	3	7	1	2	2	0	9	2	3	1	5	1	5	6	0	1	61
d__Bacteria	k__norank_d__Bacteria	p__Nitrospirae	c__Nitrospira	o__norank_c__Nitrospira	f__norank_c__Nitrospira	g__Nitrospira	s__hydrothermal_vent_metagenome_g__Nitrospira	OTU712	2	4	0	0	4	4	0	3	1	1	1	1	0	1	0	0	7	2	2	1	1	1	0	0	3	1	0	40
d__Bacteria	k__norank_d__Bacteria	p__Actinobacteria	c__Actinobacteria	o__Propionibacteriales	f__Nocardioidaceae	g__Nocardioides	s__uncultured_actinobacterium_g__Nocardioides	OTU767	6	7	1	5	17	10	5	1	4	0	20	60	4	12	13	17	8	13	10	9	6	17	36	17	17	6	5	326
d__Bacteria	k__norank_d__Bacteria	p__Actinobacteria	c__Actinobacteria	o__Propionibacteriales	f__Nocardioidaceae	g__Nocardioides	s__Nocardioides_sp._DN36	OTU3506	13	12	5	7	9	9	11	0	0	8	20	19	22	13	5	28	8	42	17	9	5	34	15	15	35	6	6	373
d__Bacteria	k__norank_d__Bacteria	p__Actinobacteria	c__Actinobacteria	o__Propionibacteriales	f__Nocardioidaceae	g__Nocardioides	s__unclassified_g__Nocardioides	OTU2311	5	4	0	1	1	0	0	0	0	1	7	15	4	4	1	5	0	4	3	2	0	3	10	6	5	2	1	84
d__Bacteria	k__norank_d__Bacteria	p__Actinobacteria	c__Actinobacteria	o__Propionibacteriales	f__Nocardioidaceae	g__Nocardioides	s__unclassified_g__Nocardioides	OTU2287	2	5	1	4	7	3	1	1	0	0	3	7	6	6	5	6	6	9	5	2	1	5	8	4	4	0	0	101
d__Bacteria	k__norank_d__Bacteria	p__Actinobacteria	c__Actinobacteria	o__Propionibacteriales	f__Nocardioidaceae	g__Nocardioides	s__Nocardioides_sp._DN36	OTU3233	3	4	1	2	9	6	3	1	4	3	13	25	12	7	5	19	4	26	7	7	1	17	30	13	16	2	2	242
d__Bacteria	k__norank_d__Bacteria	p__Proteobacteria	c__Alphaproteobacteria	o__Rhizobiales	f__Rhizobiales_Incertae_Sedis	g__Nordella	s__Nordella_oligomobilis	OTU4103	1	1	0	0	0	0	1	0	0	1	0	2	1	3	0	1	2	5	1	1	0	10	3	1	10	2	0	46
d__Bacteria	k__norank_d__Bacteria	p__Proteobacteria	c__Alphaproteobacteria	o__Rhizobiales	f__Rhizobiales_Incertae_Sedis	g__Nordella	s__uncultured_bacterium_g__Nordella	OTU889	2	2	1	1	2	1	1	1	3	0	3	4	2	4	10	3	5	1	3	3	0	11	1	2	5	0	1	72
d__Bacteria	k__norank_d__Bacteria	p__Proteobacteria	c__Alphaproteobacteria	o__Rhizobiales	f__Rhizobiales_Incertae_Sedis	g__Nordella	s__uncultured_alpha_proteobacterium_g__Nordella	OTU4337	5	6	2	0	16	2	0	0	3	2	17	14	3	7	6	17	11	9	2	4	0	12	10	1	12	2	1	164
d__Bacteria	k__norank_d__Bacteria	p__Proteobacteria	c__Gammaproteobacteria	o__Betaproteobacteriales	f__Burkholderiaceae	g__Noviherbaspirillum	s__unclassified_g__Noviherbaspirillum	OTU1523	3	4	2	1	2	4	0	3	2	1	1	1	3	2	1	0	0	2	1	5	0	0	3	2	3	3	11	60
d__Bacteria	k__norank_d__Bacteria	p__Proteobacteria	c__Alphaproteobacteria	o__Sphingomonadales	f__Sphingomonadaceae	g__Novosphingobium	s__unclassified_g__Novosphingobium	OTU3747	4	3	1	0	30	1	0	0	1	1	7	19	0	9	1	6	5	10	0	4	2	9	7	3	16	1	0	140
d__Bacteria	k__norank_d__Bacteria	p__Chloroflexi	c__Anaerolineae	o__SBR1031	f__A4b	g__OLB13	s__uncultured_bacterium_g__OLB13	OTU1094	9	8	4	0	8	4	2	1	6	7	9	11	3	13	37	2	1	1	5	10	0	13	14	10	17	24	3	222
d__Bacteria	k__norank_d__Bacteria	p__Proteobacteria	c__Deltaproteobacteria	o__Bdellovibrionales	f__Bdellovibrionaceae	g__OM27_clade	s__uncultured_bacterium_g__OM27_clade	OTU2843	7	4	2	1	12	0	0	1	2	2	10	1	3	9	6	7	15	11	1	6	0	4	3	4	7	5	4	127
d__Bacteria	k__norank_d__Bacteria	p__Proteobacteria	c__Deltaproteobacteria	o__Bdellovibrionales	f__Bdellovibrionaceae	g__OM27_clade	s__uncultured_Myxococcales_bacterium_g__OM27_clade	OTU2767	2	1	0	0	1	1	0	1	0	0	5	3	0	2	3	1	1	2	1	3	0	4	6	1	2	1	1	42
d__Bacteria	k__norank_d__Bacteria	p__Proteobacteria	c__Deltaproteobacteria	o__Bdellovibrionales	f__Bdellovibrionaceae	g__OM27_clade	s__uncultured_bacterium_g__OM27_clade	OTU913	6	4	0	0	2	0	1	1	1	1	4	2	2	10	0	1	5	2	1	1	0	1	4	2	3	3	0	57
d__Bacteria	k__norank_d__Bacteria	p__Proteobacteria	c__Deltaproteobacteria	o__Bdellovibrionales	f__Bdellovibrionaceae	g__OM27_clade	s__metagenome_g__OM27_clade	OTU3681	4	2	0	1	0	0	0	0	0	0	2	3	1	3	1	0	1	5	1	0	0	2	2	0	4	2	1	35
d__Bacteria	k__norank_d__Bacteria	p__Proteobacteria	c__Deltaproteobacteria	o__Bdellovibrionales	f__Bdellovibrionaceae	g__OM27_clade	s__uncultured_bacterium_g__OM27_clade	OTU3460	15	15	4	0	13	4	0	0	6	2	21	13	1	13	13	21	25	8	4	7	2	15	10	13	13	8	6	252
d__Bacteria	k__norank_d__Bacteria	p__Proteobacteria	c__Gammaproteobacteria	o__Cellvibrionales	f__Halieaceae	g__OM60NOR5_clade	s__unclassified_g__OM60NOR5_clade	OTU1396	7	8	2	0	22	3	0	5	2	0	22	29	2	12	41	2	3	6	2	8	2	16	16	7	24	7	1	249
d__Bacteria	k__norank_d__Bacteria	p__Acidobacteria	c__Acidobacteriia	o__Acidobacteriales	f__Acidobacteriaceae_Subgroup_1	g__Occallatibacter	s__unclassified_g__Occallatibacter	OTU4526	0	1	2	0	0	2	65	2	1	6	0	0	10	0	0	0	0	11	14	7	16	4	1	0	4	0	2	148
d__Bacteria	k__norank_d__Bacteria	p__Proteobacteria	c__Alphaproteobacteria	o__Rhizobiales	f__Rhizobiaceae	g__Ochrobactrum	s__Ochrobactrum_pseudogrignonense_g__Ochrobactrum	OTU421	6	4	3	13	22	9	1	1	16	0	23	19	5	5	17	11	8	3	3	4	1	8	16	5	4	6	0	213
d__Bacteria	k__norank_d__Bacteria	p__Proteobacteria	c__Alphaproteobacteria	o__Rhizobiales	f__Rhizobiaceae	g__Ochrobactrum	s__unclassified_g__Ochrobactrum	OTU2416	1	3	1	2	13	7	0	0	0	0	7	13	1	1	6	4	2	1	1	3	0	6	3	4	5	1	0	85
d__Bacteria	k__norank_d__Bacteria	p__Bacteroidetes	c__Bacteroidia	o__Cytophagales	f__Microscillaceae	g__Ohtaekwangia	s__uncultured_soil_bacterium_g__Ohtaekwangia	OTU1139	0	0	0	0	2	7	0	0	8	1	0	1	0	1	13	0	0	0	1	0	1	2	0	0	2	0	1	40
d__Bacteria	k__norank_d__Bacteria	p__Bacteroidetes	c__Bacteroidia	o__Cytophagales	f__Microscillaceae	g__Ohtaekwangia	s__uncultured_bacterium_g__Ohtaekwangia	OTU3362	0	1	1	0	2	2	0	3	1	8	2	3	0	2	2	0	0	0	0	1	2	1	2	3	2	8	0	46
d__Bacteria	k__norank_d__Bacteria	p__Bacteroidetes	c__Bacteroidia	o__Cytophagales	f__Microscillaceae	g__Ohtaekwangia	s__metagenome_g__Ohtaekwangia	OTU1560	2	4	0	3	0	6	0	1	3	1	2	1	2	6	6	2	0	4	3	1	0	5	0	0	5	0	4	61
d__Bacteria	k__norank_d__Bacteria	p__Bacteroidetes	c__Bacteroidia	o__Cytophagales	f__Microscillaceae	g__Ohtaekwangia	s__uncultured_bacterium_g__Ohtaekwangia	OTU2245	0	2	4	8	3	0	3	3	4	2	4	3	0	2	10	4	0	1	3	2	0	5	0	5	4	4	2	78
d__Bacteria	k__norank_d__Bacteria	p__Bacteroidetes	c__Bacteroidia	o__Cytophagales	f__Microscillaceae	g__Ohtaekwangia	s__unclassified_g__Ohtaekwangia	OTU1090	2	1	0	0	2	10	0	1	5	2	0	3	1	6	9	0	0	3	2	0	1	3	4	4	1	1	2	63
d__Bacteria	k__norank_d__Bacteria	p__Bacteroidetes	c__Bacteroidia	o__Sphingobacteriales	f__Sphingobacteriaceae	g__Olivibacter	s__Sphingobacterium_sp._21	OTU1628	0	0	1	6	0	6	1	0	0	0	2	0	0	0	0	1	0	0	0	2	4	0	1	0	0	0	0	24
d__Bacteria	k__norank_d__Bacteria	p__Verrucomicrobia	c__Verrucomicrobiae	o__Opitutales	f__Opitutaceae	g__Opitutus	s__unclassified_g__Opitutus	OTU3189	1	0	0	1	2	3	2	2	1	3	2	4	0	10	3	1	1	13	5	5	2	13	3	1	2	4	1	85
d__Bacteria	k__norank_d__Bacteria	p__Verrucomicrobia	c__Verrucomicrobiae	o__Opitutales	f__Opitutaceae	g__Opitutus	s__unclassified_g__Opitutus	OTU3909	4	4	9	6	3	6	11	8	1	7	10	10	8	22	4	2	1	10	11	5	7	16	8	6	6	11	11	207
d__Bacteria	k__norank_d__Bacteria	p__Bacteroidetes	c__Bacteroidia	o__Flavobacteriales	f__Cryomorphaceae	g__Owenweeksia	s__uncultured_bacterium_g__Owenweeksia	OTU1189	0	0	0	35	3	4	3	11	8	3	3	5	9	0	11	5	1	5	6	8	2	2	2	7	1	10	1	145
d__Bacteria	k__norank_d__Bacteria	p__Acidobacteria	c__Acidobacteriia	o__Solibacterales	f__Solibacteraceae_Subgroup_3	g__PAUC26f	s__uncultured_bacterium_g__PAUC26f	OTU1973	9	11	3	1	10	3	1	15	33	4	8	2	2	3	9	9	15	1	0	9	3	3	3	6	1	4	9	177
d__Bacteria	k__norank_d__Bacteria	p__Acidobacteria	c__Acidobacteriia	o__Solibacterales	f__Solibacteraceae_Subgroup_3	g__PAUC26f	s__uncultured_Acidobacteria_bacterium_g__PAUC26f	OTU2135	17	20	8	4	11	6	2	44	59	19	14	8	1	12	0	1	12	0	5	18	3	4	12	4	8	8	9	309
d__Bacteria	k__norank_d__Bacteria	p__Acidobacteria	c__Acidobacteriia	o__Solibacterales	f__Solibacteraceae_Subgroup_3	g__PAUC26f	s__metagenome_g__PAUC26f	OTU2620	20	33	17	8	7	9	9	19	18	23	11	12	11	10	22	1	0	6	11	10	11	11	17	19	16	17	15	363
d__Bacteria	k__norank_d__Bacteria	p__Acidobacteria	c__Acidobacteriia	o__Solibacterales	f__Solibacteraceae_Subgroup_3	g__PAUC26f	s__unclassified_g__PAUC26f	OTU2147	33	17	35	20	8	26	25	35	30	47	31	15	28	32	36	2	4	3	13	15	8	20	12	39	29	36	23	622
d__Bacteria	k__norank_d__Bacteria	p__Firmicutes	c__Bacilli	o__Bacillales	f__Paenibacillaceae	g__Paenibacillus	s__unclassified_g__Paenibacillus	OTU3785	8	1	1	2	1	0	0	0	2	5	5	0	1	0	0	3	0	2	2	1	0	1	3	1	6	9	2	56
d__Bacteria	k__norank_d__Bacteria	p__Firmicutes	c__Bacilli	o__Bacillales	f__Paenibacillaceae	g__Paenibacillus	s__unclassified_g__Paenibacillus	OTU86	1	0	2	1	2	2	12	0	0	8	0	1	0	0	0	3	0	8	4	1	1	2	0	3	1	3	2	57
d__Bacteria	k__norank_d__Bacteria	p__Firmicutes	c__Bacilli	o__Bacillales	f__Paenibacillaceae	g__Paenibacillus	s__unclassified_g__Paenibacillus	OTU4098	64	29	20	1	3	6	5	0	7	12	9	5	2	4	12	2	1	5	3	5	2	3	1	10	0	5	5	221
d__Bacteria	k__norank_d__Bacteria	p__Firmicutes	c__Bacilli	o__Bacillales	f__Paenibacillaceae	g__Paenibacillus	s__unclassified_g__Paenibacillus	OTU1750	5	0	1	1	0	3	1	0	5	1	3	0	1	2	5	0	1	0	1	2	0	0	0	1	1	2	0	36
d__Bacteria	k__norank_d__Bacteria	p__Firmicutes	c__Bacilli	o__Bacillales	f__Paenibacillaceae	g__Paenibacillus	s__unclassified_g__Paenibacillus	OTU4045	1	1	3	0	0	1	6	2	2	0	2	0	7	0	0	0	0	1	0	2	3	0	0	2	0	8	8	49
d__Bacteria	k__norank_d__Bacteria	p__Firmicutes	c__Bacilli	o__Bacillales	f__Paenibacillaceae	g__Paenibacillus	s__unclassified_g__Paenibacillus	OTU883	1	0	0	0	0	0	8	0	0	0	0	0	7	1	0	0	0	2	0	0	8	0	0	0	0	0	3	30
d__Bacteria	k__norank_d__Bacteria	p__Firmicutes	c__Bacilli	o__Bacillales	f__Paenibacillaceae	g__Paenibacillus	s__unclassified_g__Paenibacillus	OTU13	0	0	0	1	0	0	9	4	1	0	1	1	5	0	0	0	0	0	3	2	7	0	0	0	0	1	3	38
d__Bacteria	k__norank_d__Bacteria	p__Firmicutes	c__Bacilli	o__Bacillales	f__Paenibacillaceae	g__Paenibacillus	s__unclassified_g__Paenibacillus	OTU2094	11	6	12	1	0	2	2	1	4	0	5	4	3	3	8	1	2	2	1	2	1	1	3	6	13	5	2	101
d__Bacteria	k__norank_d__Bacteria	p__Firmicutes	c__Bacilli	o__Bacillales	f__Paenibacillaceae	g__Paenibacillus	s__unclassified_g__Paenibacillus	OTU2085	20	22	9	7	2	7	3	3	3	13	3	3	1	2	8	7	22	2	3	1	1	3	2	9	2	4	1	163
d__Bacteria	k__norank_d__Bacteria	p__Firmicutes	c__Bacilli	o__Bacillales	f__Paenibacillaceae	g__Paenibacillus	s__unclassified_g__Paenibacillus	OTU1736	2	8	7	4	2	1	3	1	1	5	1	1	0	8	3	6	5	1	1	3	0	2	3	8	2	4	2	84
d__Bacteria	k__norank_d__Bacteria	p__Firmicutes	c__Bacilli	o__Bacillales	f__Paenibacillaceae	g__Paenibacillus	s__unclassified_g__Paenibacillus	OTU3823	0	3	1	2	0	1	20	3	1	3	0	1	31	0	0	1	1	1	0	1	9	0	1	2	0	15	23	120
d__Bacteria	k__norank_d__Bacteria	p__Firmicutes	c__Bacilli	o__Bacillales	f__Paenibacillaceae	g__Paenibacillus	s__Paenibacillus_alginolyticus	OTU1575	6	4	0	2	4	7	3	0	1	4	1	1	1	0	4	12	14	7	1	2	0	1	1	1	1	0	1	79
d__Bacteria	k__norank_d__Bacteria	p__Firmicutes	c__Bacilli	o__Bacillales	f__Paenibacillaceae	g__Paenibacillus	s__unclassified_g__Paenibacillus	OTU3768	135	107	134	4	9	14	3	4	8	20	20	13	5	15	20	6	5	10	3	11	4	8	10	11	24	16	11	630
d__Bacteria	k__norank_d__Bacteria	p__Firmicutes	c__Bacilli	o__Bacillales	f__Paenibacillaceae	g__Paenibacillus	s__uncultured_Paenibacillus_sp._g__Paenibacillus	OTU3775	1	2	0	1	1	4	1	2	0	3	0	2	3	1	0	0	1	3	2	4	7	0	1	1	4	2	4	50
d__Bacteria	k__norank_d__Bacteria	p__Proteobacteria	c__Deltaproteobacteria	o__Myxococcales	f__Polyangiaceae	g__Pajaroellobacter	s__uncultured_delta_proteobacterium_g__Pajaroellobacter	OTU3287	4	9	2	2	6	0	2	0	2	1	4	3	2	12	2	1	1	2	1	1	0	4	2	4	13	1	2	83
d__Bacteria	k__norank_d__Bacteria	p__Proteobacteria	c__Deltaproteobacteria	o__Myxococcales	f__Polyangiaceae	g__Pajaroellobacter	s__metagenome_g__Pajaroellobacter	OTU3868	1	3	1	0	3	0	0	0	0	1	8	3	1	13	2	1	0	1	0	2	0	7	9	2	10	0	2	70
d__Bacteria	k__norank_d__Bacteria	p__Acidobacteria	c__Acidobacteriia	o__Solibacterales	f__Solibacteraceae_Subgroup_3	g__Paludibaculum	s__metagenome_g__Paludibaculum	OTU1061	3	2	2	2	4	14	1	10	37	12	4	5	2	1	51	0	2	4	9	2	2	11	6	2	10	3	6	207
d__Bacteria	k__norank_d__Bacteria	p__Acidobacteria	c__Acidobacteriia	o__Solibacterales	f__Solibacteraceae_Subgroup_3	g__Paludibaculum	s__uncultured_bacterium_g__Paludibaculum	OTU2216	0	0	2	1	0	3	4	1	2	2	1	0	1	0	1	0	1	0	2	0	12	2	0	2	3	0	1	41
d__Bacteria	k__norank_d__Bacteria	p__Acidobacteria	c__Acidobacteriia	o__Solibacterales	f__Solibacteraceae_Subgroup_3	g__Paludibaculum	s__unclassified_g__Paludibaculum	OTU590	7	1	0	0	0	7	1	3	4	3	1	2	3	3	2	0	3	0	2	0	1	9	2	0	1	1	5	61
d__Bacteria	k__norank_d__Bacteria	p__Planctomycetes	c__Planctomycetacia	o__Isosphaerales	f__Isosphaeraceae	g__Paludisphaera	s__Paludisphaera_borealis	OTU3302	2	0	0	0	1	0	1	0	0	0	2	5	2	3	0	1	0	6	2	2	0	7	1	1	4	0	0	40
d__Bacteria	k__norank_d__Bacteria	p__Proteobacteria	c__Gammaproteobacteria	o__Salinisphaerales	f__Solimonadaceae	g__Panacagrimonas	s__uncultured_bacterium_g__Panacagrimonas	OTU3783	3	5	2	1	0	2	0	3	4	4	2	6	2	4	0	0	0	5	4	4	1	18	5	2	4	5	1	87
d__Bacteria	k__norank_d__Bacteria	p__Proteobacteria	c__Alphaproteobacteria	o__Rhodobacterales	f__Rhodobacteraceae	g__Paracoccus	s__unclassified_g__Paracoccus	OTU2327	3	0	0	1	22	3	1	0	3	2	1	5	2	0	5	4	3	2	2	3	0	1	4	3	3	1	1	75
d__Bacteria	k__norank_d__Bacteria	p__Bacteroidetes	c__Bacteroidia	o__Chitinophagales	f__Chitinophagaceae	g__Parafilimonas	s__uncultured_bacterium_g__Parafilimonas	OTU627	1	1	2	6	0	0	7	0	1	5	0	4	7	2	3	0	0	7	3	0	9	9	3	3	7	0	8	88
d__Bacteria	k__norank_d__Bacteria	p__Actinobacteria	c__Actinobacteria	o__Micrococcales	f__Microbacteriaceae	g__Parafrigoribacterium	s__uncultured_bacterium_g__Parafrigoribacterium	OTU3652	6	2	3	1	9	4	3	0	2	1	9	17	12	12	10	8	2	9	7	3	6	7	20	8	12	5	13	191
d__Bacteria	k__norank_d__Bacteria	p__Bacteroidetes	c__Bacteroidia	o__Sphingobacteriales	f__Sphingobacteriaceae	g__Parapedobacter	s__uncultured_bacterium_g__Parapedobacter	OTU1535	2	1	2	72	11	17	4	14	5	2	6	10	7	3	1	18	0	1	14	4	6	1	7	5	1	8	1	223
d__Bacteria	k__norank_d__Bacteria	p__Proteobacteria	c__Gammaproteobacteria	o__Enterobacteriales	f__Enterobacteriaceae	g__Pectobacterium	s__Pectobacterium_carotovorum_subsp._odoriferum_g__Pectobacterium	OTU2068	468	44	332	6	28	4	2	0	1	0	8	2	3	8	3	3	1	0	0	4	0	0	2	10	0	0	0	929
d__Bacteria	k__norank_d__Bacteria	p__Bacteroidetes	c__Bacteroidia	o__Sphingobacteriales	f__Sphingobacteriaceae	g__Pedobacter	s__uncultured_Sphingobacteriaceae_bacterium_g__Pedobacter	OTU1369	0	0	0	0	8	9	13	9	8	2	5	6	12	0	2	10	4	1	16	9	47	7	12	6	5	4	18	213
d__Bacteria	k__norank_d__Bacteria	p__Bacteroidetes	c__Bacteroidia	o__Sphingobacteriales	f__Sphingobacteriaceae	g__Pedobacter	s__unclassified_g__Pedobacter	OTU1500	0	1	1	0	0	2	0	0	1	1	0	0	5	1	1	0	0	0	4	0	4	1	0	3	0	0	6	31
d__Bacteria	k__norank_d__Bacteria	p__Bacteroidetes	c__Bacteroidia	o__Sphingobacteriales	f__Sphingobacteriaceae	g__Pedobacter	s__unclassified_g__Pedobacter	OTU1451	0	0	0	0	7	3	3	1	4	2	0	0	2	0	1	9	0	3	1	2	9	0	0	0	2	1	4	54
d__Bacteria	k__norank_d__Bacteria	p__Bacteroidetes	c__Bacteroidia	o__Sphingobacteriales	f__Sphingobacteriaceae	g__Pedobacter	s__uncultured_organism_g__Pedobacter	OTU1576	1	1	2	6	16	28	2	16	7	6	2	5	3	1	16	8	9	7	12	3	12	8	11	2	1	5	2	192
d__Bacteria	k__norank_d__Bacteria	p__Bacteroidetes	c__Bacteroidia	o__Sphingobacteriales	f__Sphingobacteriaceae	g__Pedobacter	s__unclassified_g__Pedobacter	OTU1559	4	1	9	11	7	4	1	3	4	11	2	0	1	4	4	0	2	0	4	2	0	0	1	1	1	1	3	81
d__Bacteria	k__norank_d__Bacteria	p__Bacteroidetes	c__Bacteroidia	o__Sphingobacteriales	f__Sphingobacteriaceae	g__Pedobacter	s__unclassified_g__Pedobacter	OTU1153	1	2	1	4	18	24	4	9	27	7	9	45	9	9	23	5	5	22	25	6	12	12	29	29	2	12	5	356
d__Bacteria	k__norank_d__Bacteria	p__Proteobacteria	c__Alphaproteobacteria	o__Rhizobiales	f__Hyphomicrobiaceae	g__Pedomicrobium	s__unclassified_g__Pedomicrobium	OTU595	8	3	1	2	17	3	0	0	4	1	12	8	2	17	13	1	1	3	1	4	1	8	8	4	16	1	1	140
d__Bacteria	k__norank_d__Bacteria	p__Proteobacteria	c__Alphaproteobacteria	o__Rhizobiales	f__Hyphomicrobiaceae	g__Pedomicrobium	s__uncultured_alpha_proteobacterium_g__Pedomicrobium	OTU1140	0	3	0	0	3	2	0	0	1	3	1	0	2	2	4	3	4	2	3	0	0	3	0	2	2	0	3	43
d__Bacteria	k__norank_d__Bacteria	p__Proteobacteria	c__Alphaproteobacteria	o__Rhodovibrionales	f__Kiloniellaceae	g__Pelagibius	s__unclassified_g__Pelagibius	OTU3799	36	63	16	5	33	5	1	14	29	13	48	22	3	45	32	4	9	5	3	22	0	6	40	28	1	51	18	552
d__Bacteria	k__norank_d__Bacteria	p__Proteobacteria	c__Gammaproteobacteria	o__Pseudomonadales	f__Moraxellaceae	g__Permianibacter	s__uncultured_bacterium_g__Permianibacter	OTU2460	0	9	5	0	4	0	0	0	0	0	1	0	0	0	2	0	2	0	1	0	0	0	1	0	7	0	0	32
d__Bacteria	k__norank_d__Bacteria	p__Bacteroidetes	c__Bacteroidia	o__Cytophagales	f__Spirosomaceae	g__Persicitalea	s__Bacteroidetes_bacterium_g__Persicitalea	OTU3480	0	0	0	4	2	0	0	1	2	1	0	1	0	0	3	0	0	0	2	0	0	0	0	3	0	0	0	19
d__Bacteria	k__norank_d__Bacteria	p__Proteobacteria	c__Deltaproteobacteria	o__Myxococcales	f__Phaselicystidaceae	g__Phaselicystis	s__uncultured_Polyangiaceae_bacterium_g__Phaselicystis	OTU3020	1	3	1	1	1	1	0	0	0	1	0	1	3	0	0	2	0	3	1	1	0	4	0	2	5	1	1	33
d__Bacteria	k__norank_d__Bacteria	p__Proteobacteria	c__Alphaproteobacteria	o__Caulobacterales	f__Caulobacteraceae	g__Phenylobacterium	s__unclassified_g__Phenylobacterium	OTU2339	32	21	28	23	53	19	36	22	39	45	31	19	37	54	36	19	7	81	53	143	18	54	94	42	50	135	21	1212
d__Bacteria	k__norank_d__Bacteria	p__Proteobacteria	c__Alphaproteobacteria	o__Caulobacterales	f__Caulobacteraceae	g__Phenylobacterium	s__unclassified_g__Phenylobacterium	OTU4542	43	48	42	44	56	84	77	50	40	54	61	68	67	54	61	54	23	97	101	91	48	92	75	65	84	64	45	1688
d__Bacteria	k__norank_d__Bacteria	p__Planctomycetes	c__Planctomycetacia	o__Pirellulales	f__Pirellulaceae	g__Pir4_lineage	s__metagenome_g__Pir4_lineage	OTU2757	16	31	9	2	20	6	6	4	7	14	12	17	10	31	62	3	7	7	3	15	3	19	19	15	50	30	9	427
d__Bacteria	k__norank_d__Bacteria	p__Planctomycetes	c__Planctomycetacia	o__Pirellulales	f__Pirellulaceae	g__Pir4_lineage	s__unclassified_g__Pir4_lineage	OTU2787	6	5	0	0	17	0	1	1	2	0	19	9	0	6	4	11	9	3	0	8	0	4	2	1	4	2	0	114
d__Bacteria	k__norank_d__Bacteria	p__Planctomycetes	c__Planctomycetacia	o__Pirellulales	f__Pirellulaceae	g__Pir4_lineage	s__unclassified_g__Pir4_lineage	OTU749	7	16	0	0	4	1	1	1	6	1	9	5	2	8	13	0	0	1	2	3	1	3	3	1	11	7	2	108
d__Bacteria	k__norank_d__Bacteria	p__Planctomycetes	c__Planctomycetacia	o__Pirellulales	f__Pirellulaceae	g__Pir4_lineage	s__planctomycete_str._292	OTU2796	2	5	2	0	7	1	0	0	3	0	9	9	2	2	23	1	2	1	3	2	0	6	0	5	21	3	0	109
d__Bacteria	k__norank_d__Bacteria	p__Planctomycetes	c__Planctomycetacia	o__Pirellulales	f__Pirellulaceae	g__Pir4_lineage	s__unclassified_g__Pir4_lineage	OTU379	4	2	1	0	5	5	2	0	3	2	6	3	1	7	5	3	3	3	0	2	0	4	0	2	1	3	3	70
d__Bacteria	k__norank_d__Bacteria	p__Planctomycetes	c__Planctomycetacia	o__Pirellulales	f__Pirellulaceae	g__Pir4_lineage	s__uncultured_bacterium_g__Pir4_lineage	OTU452	9	16	1	0	13	0	0	1	2	0	11	9	0	9	4	2	3	3	0	8	0	5	4	6	4	1	2	113
d__Bacteria	k__norank_d__Bacteria	p__Planctomycetes	c__Planctomycetacia	o__Pirellulales	f__Pirellulaceae	g__Pir4_lineage	s__unclassified_g__Pir4_lineage	OTU3092	3	3	2	0	2	1	0	5	1	1	2	2	0	3	16	0	0	0	0	1	0	2	2	0	4	0	4	54
d__Bacteria	k__norank_d__Bacteria	p__Planctomycetes	c__Planctomycetacia	o__Pirellulales	f__Pirellulaceae	g__Pir4_lineage	s__unclassified_g__Pir4_lineage	OTU2861	5	3	3	0	3	1	1	0	0	2	5	10	10	5	3	2	1	9	1	9	1	6	0	5	9	3	2	99
d__Bacteria	k__norank_d__Bacteria	p__Planctomycetes	c__Planctomycetacia	o__Pirellulales	f__Pirellulaceae	g__Pir4_lineage	s__unclassified_g__Pir4_lineage	OTU3887	2	11	2	1	5	3	1	0	3	2	10	8	5	8	9	4	2	7	3	5	2	11	5	5	14	7	2	137
d__Bacteria	k__norank_d__Bacteria	p__Planctomycetes	c__Planctomycetacia	o__Pirellulales	f__Pirellulaceae	g__Pir4_lineage	s__uncultured_Pirellula_sp._g__Pir4_lineage	OTU3313	0	1	0	0	3	0	0	0	0	0	4	4	0	1	6	0	0	1	1	2	0	5	1	2	4	5	0	40
d__Bacteria	k__norank_d__Bacteria	p__Planctomycetes	c__Planctomycetacia	o__Pirellulales	f__Pirellulaceae	g__Pir4_lineage	s__uncultured_bacterium_g__Pir4_lineage	OTU745	2	2	1	0	8	3	0	0	0	0	7	4	0	2	0	8	12	1	0	1	0	0	1	0	3	1	0	56
d__Bacteria	k__norank_d__Bacteria	p__Planctomycetes	c__Planctomycetacia	o__Pirellulales	f__Pirellulaceae	g__Pir4_lineage	s__uncultured_bacterium_g__Pir4_lineage	OTU3446	0	6	2	2	5	2	1	0	5	0	6	2	1	4	9	2	3	2	1	0	0	5	2	7	1	8	2	78
d__Bacteria	k__norank_d__Bacteria	p__Planctomycetes	c__Planctomycetacia	o__Pirellulales	f__Pirellulaceae	g__Pir4_lineage	s__uncultured_Pirellula_sp._g__Pir4_lineage	OTU3512	6	10	4	0	9	2	1	4	5	2	11	5	0	12	18	4	7	1	4	12	1	3	12	10	5	10	4	162
d__Bacteria	k__norank_d__Bacteria	p__Planctomycetes	c__Planctomycetacia	o__Pirellulales	f__Pirellulaceae	g__Pir4_lineage	s__unclassified_g__Pir4_lineage	OTU721	2	6	1	0	2	0	0	1	0	0	3	9	1	1	8	0	1	0	0	3	0	5	0	1	7	7	0	58
d__Bacteria	k__norank_d__Bacteria	p__Planctomycetes	c__Planctomycetacia	o__Pirellulales	f__Pirellulaceae	g__Pirellula	s__uncultured_bacterium_g__Pirellula	OTU2748	8	5	1	3	13	7	1	0	2	6	7	15	9	10	10	1	2	12	0	4	3	10	16	15	17	7	2	186
d__Bacteria	k__norank_d__Bacteria	p__Planctomycetes	c__Planctomycetacia	o__Pirellulales	f__Pirellulaceae	g__Pirellula	s__unclassified_g__Pirellula	OTU2226	2	4	1	0	4	1	0	1	0	0	1	1	3	2	2	0	0	7	3	0	1	11	2	3	5	0	3	57
d__Bacteria	k__norank_d__Bacteria	p__Planctomycetes	c__Planctomycetacia	o__Pirellulales	f__Pirellulaceae	g__Pirellula	s__uncultured_Pirellula_sp._g__Pirellula	OTU3514	2	1	0	2	1	0	0	0	1	0	5	5	1	5	2	0	1	1	0	2	0	2	1	0	13	11	3	59
d__Bacteria	k__norank_d__Bacteria	p__Planctomycetes	c__Planctomycetacia	o__Pirellulales	f__Pirellulaceae	g__Pirellula	s__unclassified_g__Pirellula	OTU3677	1	4	0	0	0	0	0	2	2	2	2	0	0	3	8	0	1	0	1	1	1	2	1	2	3	4	0	40
d__Bacteria	k__norank_d__Bacteria	p__Planctomycetes	c__Planctomycetacia	o__Pirellulales	f__Pirellulaceae	g__Pirellula	s__uncultured_bacterium_g__Pirellula	OTU4322	1	1	0	0	4	2	0	0	1	0	1	0	0	1	3	17	13	0	1	0	0	2	3	0	0	0	3	53
d__Bacteria	k__norank_d__Bacteria	p__Planctomycetes	c__Planctomycetacia	o__Pirellulales	f__Pirellulaceae	g__Pirellula	s__uncultured_bacterium_g__Pirellula	OTU2570	3	1	1	1	15	1	0	0	0	2	8	6	3	7	0	1	0	1	1	6	0	4	6	6	4	2	1	80
d__Bacteria	k__norank_d__Bacteria	p__Planctomycetes	c__Planctomycetacia	o__Pirellulales	f__Pirellulaceae	g__Pirellula	s__unclassified_g__Pirellula	OTU1063	7	5	4	1	4	1	0	0	1	4	12	9	4	20	8	1	3	8	1	6	1	21	9	9	34	7	3	183
d__Bacteria	k__norank_d__Bacteria	p__Planctomycetes	c__Planctomycetacia	o__Pirellulales	f__Pirellulaceae	g__Pirellula	s__uncultured_bacterium_g__Pirellula	OTU354	2	3	1	0	2	0	0	0	2	1	17	8	4	11	6	5	0	15	0	6	0	12	4	7	12	9	2	129
d__Bacteria	k__norank_d__Bacteria	p__Planctomycetes	c__Planctomycetacia	o__Pirellulales	f__Pirellulaceae	g__Pirellula	s__unclassified_g__Pirellula	OTU1066	2	2	1	0	8	0	0	0	1	0	8	6	0	0	14	9	7	2	0	1	0	14	3	2	16	1	1	98
d__Bacteria	k__norank_d__Bacteria	p__Planctomycetes	c__Planctomycetacia	o__Pirellulales	f__Pirellulaceae	g__Pirellula	s__metagenome_g__Pirellula	OTU1099	5	1	0	1	2	1	0	0	0	1	7	1	0	2	9	1	0	1	5	0	1	4	1	2	7	3	0	55
d__Bacteria	k__norank_d__Bacteria	p__Planctomycetes	c__Planctomycetacia	o__Pirellulales	f__Pirellulaceae	g__Pirellula	s__metagenome_g__Pirellula	OTU3997	1	1	0	2	1	1	0	4	2	2	3	4	2	4	10	0	0	1	2	3	0	2	0	4	7	1	2	59
d__Bacteria	k__norank_d__Bacteria	p__Planctomycetes	c__Planctomycetacia	o__Pirellulales	f__Pirellulaceae	g__Pirellula	s__uncultured_Planctomycetaceae_bacterium_g__Pirellula	OTU1295	3	6	1	0	6	0	0	0	1	0	5	1	0	4	3	10	4	1	0	3	0	4	5	2	8	3	0	70
d__Bacteria	k__norank_d__Bacteria	p__Planctomycetes	c__Planctomycetacia	o__Pirellulales	f__Pirellulaceae	g__Pirellula	s__uncultured_Pasteuria_sp._g__Pirellula	OTU2524	1	0	0	0	0	1	0	0	0	0	1	1	0	0	3	3	1	19	1	0	1	12	0	0	7	0	1	52
d__Bacteria	k__norank_d__Bacteria	p__Planctomycetes	c__Planctomycetacia	o__Pirellulales	f__Pirellulaceae	g__Pirellula	s__unclassified_g__Pirellula	OTU2046	3	4	1	0	3	0	0	0	1	0	4	3	0	3	2	3	8	0	1	0	0	3	1	1	1	0	0	42
d__Bacteria	k__norank_d__Bacteria	p__Planctomycetes	c__Planctomycetacia	o__Pirellulales	f__Pirellulaceae	g__Pirellula	s__unclassified_g__Pirellula	OTU4354	4	7	0	1	2	1	0	1	1	0	9	5	1	7	3	5	5	2	0	5	0	1	8	2	7	1	0	78
d__Bacteria	k__norank_d__Bacteria	p__Planctomycetes	c__Planctomycetacia	o__Pirellulales	f__Pirellulaceae	g__Pirellula	s__unclassified_g__Pirellula	OTU1377	3	12	0	0	5	0	0	0	0	1	7	5	0	1	2	2	7	3	0	0	0	4	2	0	8	0	1	63
d__Bacteria	k__norank_d__Bacteria	p__Planctomycetes	c__Planctomycetacia	o__Pirellulales	f__Pirellulaceae	g__Pirellula	s__unclassified_g__Pirellula	OTU2715	0	0	0	0	1	0	0	0	0	0	1	2	0	1	3	2	0	5	0	0	0	3	0	3	6	0	0	27
d__Bacteria	k__norank_d__Bacteria	p__Planctomycetes	c__Planctomycetacia	o__Pirellulales	f__Pirellulaceae	g__Pirellula	s__uncultured_Pasteuria_sp._g__Pirellula	OTU657	1	1	0	0	5	0	0	0	0	0	4	3	0	1	2	1	0	7	0	0	0	12	1	1	11	0	0	50
d__Bacteria	k__norank_d__Bacteria	p__Planctomycetes	c__Planctomycetacia	o__Pirellulales	f__Pirellulaceae	g__Pirellula	s__uncultured_soil_bacterium_g__Pirellula	OTU2640	13	34	3	1	10	4	1	1	6	4	11	13	2	8	15	3	22	1	1	5	0	12	8	6	3	3	3	193
d__Bacteria	k__norank_d__Bacteria	p__Planctomycetes	c__Planctomycetacia	o__Pirellulales	f__Pirellulaceae	g__Pirellula	s__unclassified_g__Pirellula	OTU1918	2	6	0	0	7	0	0	0	0	0	5	4	0	3	1	0	0	0	0	0	0	3	2	1	2	0	0	36
d__Bacteria	k__norank_d__Bacteria	p__Planctomycetes	c__Planctomycetacia	o__Pirellulales	f__Pirellulaceae	g__Pirellula	s__uncultured_bacterium_g__Pirellula	OTU3355	1	2	0	0	2	0	0	1	0	0	6	4	0	2	1	1	1	1	0	2	0	5	1	3	6	1	0	40
d__Bacteria	k__norank_d__Bacteria	p__Proteobacteria	c__Gammaproteobacteria	o__Betaproteobacteriales	f__Burkholderiaceae	g__Piscinibacter	s__uncultured_bacterium_g__Piscinibacter	OTU2619	70	48	200	212	107	418	296	230	424	352	197	182	89	99	219	133	47	225	992	199	166	367	146	278	203	178	148	6225
d__Bacteria	k__norank_d__Bacteria	p__Planctomycetes	c__Planctomycetacia	o__Planctomycetales	f__Rubinisphaeraceae	g__Planctomicrobium	s__uncultured_bacterium_g__Planctomicrobium	OTU1047	4	6	7	2	1	0	1	3	5	17	2	3	6	4	5	1	0	1	0	3	0	0	6	6	1	9	7	100
d__Bacteria	k__norank_d__Bacteria	p__Planctomycetes	c__Planctomycetacia	o__Planctomycetales	f__Rubinisphaeraceae	g__Planctomicrobium	s__uncultured_bacterium_g__Planctomicrobium	OTU1830	4	15	9	0	9	4	2	7	18	1	12	4	3	5	34	0	7	3	8	7	2	3	5	6	4	9	14	195
d__Bacteria	k__norank_d__Bacteria	p__Planctomycetes	c__Planctomycetacia	o__Planctomycetales	f__Rubinisphaeraceae	g__Planctomicrobium	s__uncultured_Planctomyces_sp._g__Planctomicrobium	OTU447	2	2	5	5	16	3	2	4	3	6	9	8	5	7	8	1	1	1	5	6	0	3	10	9	7	11	10	149
d__Bacteria	k__norank_d__Bacteria	p__Planctomycetes	c__Planctomycetacia	o__Planctomycetales	f__Rubinisphaeraceae	g__Planctomicrobium	s__uncultured_bacterium_g__Planctomicrobium	OTU1913	4	15	3	1	3	2	0	2	4	3	9	8	0	11	14	1	1	0	0	10	1	0	7	8	3	11	1	122
d__Bacteria	k__norank_d__Bacteria	p__Planctomycetes	c__Planctomycetacia	o__Planctomycetales	f__Schlesneriaceae	g__Planctopirus	s__uncultured_bacterium_g__Planctopirus	OTU444	2	2	0	0	4	0	0	0	0	0	17	3	0	14	2	1	1	0	1	2	0	9	1	3	12	0	0	74
d__Bacteria	k__norank_d__Bacteria	p__Proteobacteria	c__Gammaproteobacteria	o__Salinisphaerales	f__Solimonadaceae	g__Polycyclovorans	s__uncultured_bacterium_g__Polycyclovorans	OTU1342	54	233	31	5	13	3	1	45	32	33	7	8	2	10	13	8	11	11	1	45	1	8	21	21	6	18	9	650
d__Bacteria	k__norank_d__Bacteria	p__Proteobacteria	c__Gammaproteobacteria	o__Salinisphaerales	f__Solimonadaceae	g__Polycyclovorans	s__uncultured_Xanthomonadales_bacterium_g__Polycyclovorans	OTU4351	86	326	40	9	52	16	8	51	44	25	56	22	6	50	29	16	11	6	8	82	9	62	30	26	54	37	28	1189
d__Bacteria	k__norank_d__Bacteria	p__Proteobacteria	c__Gammaproteobacteria	o__Salinisphaerales	f__Solimonadaceae	g__Polycyclovorans	s__uncultured_Xanthomonadaceae_bacterium_g__Polycyclovorans	OTU4453	1	1	3	3	0	2	6	2	1	4	0	1	4	3	0	2	2	7	1	2	4	4	2	1	0	2	4	62
d__Bacteria	k__norank_d__Bacteria	p__Proteobacteria	c__Gammaproteobacteria	o__Salinisphaerales	f__Solimonadaceae	g__Polycyclovorans	s__uncultured_bacterium_g__Polycyclovorans	OTU4019	3	18	0	0	5	3	2	1	1	2	6	1	2	1	0	28	7	6	4	3	2	4	0	0	1	2	2	104
d__Bacteria	k__norank_d__Bacteria	p__Proteobacteria	c__Gammaproteobacteria	o__Betaproteobacteriales	f__Burkholderiaceae	g__Polynucleobacter	s__Polynucleobacter_asymbioticus	OTU263	0	0	0	0	1	3	2	0	2	2	0	0	0	0	0	9	1	9	1	3	0	1	0	2	0	3	1	40
d__Bacteria	k__norank_d__Bacteria	p__Bacteroidetes	c__Bacteroidia	o__Cytophagales	f__Hymenobacteraceae	g__Pontibacter	s__uncultured_bacterium_g__Pontibacter	OTU1511	8	10	4	3	10	18	4	3	10	4	17	21	3	13	14	6	8	6	7	7	1	8	20	11	2	14	12	244
d__Bacteria	k__norank_d__Bacteria	p__Bacteroidetes	c__Bacteroidia	o__Cytophagales	f__Hymenobacteraceae	g__Pontibacter	s__uncultured_Pontibacter_sp.	OTU1078	0	0	2	1	1	5	0	0	5	0	0	1	0	0	3	3	1	2	0	0	0	1	3	4	0	4	1	37
d__Bacteria	k__norank_d__Bacteria	p__Bacteroidetes	c__Bacteroidia	o__Cytophagales	f__Hymenobacteraceae	g__Pontibacter	s__Pontibacter_sp._LX8	OTU1383	17	29	15	8	57	92	5	14	98	27	80	50	12	42	104	22	35	50	18	46	6	23	73	81	26	68	17	1115
d__Bacteria	k__norank_d__Bacteria	p__Proteobacteria	c__Alphaproteobacteria	o__Sphingomonadales	f__Sphingomonadaceae	g__Porphyrobacter	s__unclassified_g__Porphyrobacter	OTU3600	9	7	1	0	13	2	2	0	0	0	15	10	3	6	4	7	2	17	1	5	0	14	5	6	19	1	2	151
d__Bacteria	k__norank_d__Bacteria	p__Actinobacteria	c__Actinobacteria	o__Micrococcales	f__Promicromonosporaceae	g__Promicromonospora	s__unclassified_g__Promicromonospora	OTU2505	1	3	1	16	3	48	17	0	1	8	2	10	1	1	4	28	5	19	0	6	20	4	13	21	4	4	2	242
d__Bacteria	k__norank_d__Bacteria	p__Proteobacteria	c__Gammaproteobacteria	o__Enterobacteriales	f__Enterobacteriaceae	g__Proteus	s__Proteus_mirabilis	OTU2092	90	8	78	0	0	0	0	0	0	0	0	0	0	0	0	0	0	0	0	0	0	0	0	0	0	0	0	176
d__Bacteria	k__norank_d__Bacteria	p__Proteobacteria	c__Gammaproteobacteria	o__Enterobacteriales	f__Enterobacteriaceae	g__Providencia	s__unclassified_g__Providencia	OTU2086	155	13	106	0	0	0	0	0	0	0	0	1	0	0	0	2	0	0	1	0	0	1	0	0	0	0	0	279
d__Bacteria	k__norank_d__Bacteria	p__Proteobacteria	c__Alphaproteobacteria	o__Rhizobiales	f__Rhizobiaceae	g__Pseudaminobacter	s__uncultured_bacterium_g__Pseudaminobacter	OTU2483	5	2	3	2	5	7	3	0	0	0	6	5	2	4	2	7	2	3	0	5	1	5	6	5	3	2	4	89
d__Bacteria	k__norank_d__Bacteria	p__Cyanobacteria	c__Oxyphotobacteria	o__Oxyphotobacteria_Incertae_Sedis	f__unclassified_o__Oxyphotobacteria_Incertae_Sedis	g__Pseudanabaena_NgrPSln22	s__Pseudanabaena_sp._SCSIO_S3	OTU2946	18	3	1	0	2	0	2	6	2	0	1	5	18	0	4	4	0	0	9	2	0	3	3	6	0	6	0	95
d__Bacteria	k__norank_d__Bacteria	p__Proteobacteria	c__Gammaproteobacteria	o__Xanthomonadales	f__Rhodanobacteraceae	g__Pseudofulvimonas	s__uncultured_bacterium_g__Pseudofulvimonas	OTU2794	0	0	0	0	1	0	0	0	8	0	0	0	0	0	11	0	0	0	2	0	0	7	0	2	0	0	1	32
d__Bacteria	k__norank_d__Bacteria	p__Proteobacteria	c__Gammaproteobacteria	o__Betaproteobacteriales	f__Chromobacteriaceae	g__Pseudogulbenkiania	s__Pseudogulbenkiania_sp._NH8B	OTU2150	2	3	6	0	1	4	14	0	4	0	4	3	2	0	3	5	0	6	3	7	11	16	1	2	20	3	7	127
d__Bacteria	k__norank_d__Bacteria	p__Proteobacteria	c__Alphaproteobacteria	o__Rhizobiales	f__Xanthobacteraceae	g__Pseudolabrys	s__uncultured_Pseudolabrys_sp._g__Pseudolabrys	OTU996	9	5	9	0	7	2	4	0	5	7	9	19	7	25	11	7	2	25	4	9	3	26	14	6	33	3	7	258
d__Bacteria	k__norank_d__Bacteria	p__Proteobacteria	c__Alphaproteobacteria	o__Rhizobiales	f__Xanthobacteraceae	g__Pseudolabrys	s__uncultured_bacterium_g__Pseudolabrys	OTU1084	29	27	9	2	44	10	10	6	3	2	56	32	10	39	23	9	6	33	5	35	1	22	20	19	33	14	5	504
d__Bacteria	k__norank_d__Bacteria	p__Proteobacteria	c__Alphaproteobacteria	o__Rhizobiales	f__Xanthobacteraceae	g__Pseudolabrys	s__unclassified_g__Pseudolabrys	OTU2625	35	36	10	11	42	5	3	6	4	10	65	37	14	53	21	16	3	31	6	44	0	27	26	21	64	8	4	602
d__Bacteria	k__norank_d__Bacteria	p__Proteobacteria	c__Alphaproteobacteria	o__Rhizobiales	f__Xanthobacteraceae	g__Pseudolabrys	s__uncultured_bacterium_g__Pseudolabrys	OTU4132	5	8	4	3	14	1	3	0	3	0	25	10	2	22	13	6	3	16	9	14	3	19	12	10	25	5	3	238
d__Bacteria	k__norank_d__Bacteria	p__Proteobacteria	c__Alphaproteobacteria	o__Rhizobiales	f__Xanthobacteraceae	g__Pseudolabrys	s__unclassified_g__Pseudolabrys	OTU2240	8	4	4	6	6	9	13	4	6	7	5	5	7	9	8	4	2	16	9	9	1	16	9	11	16	6	1	201
d__Bacteria	k__norank_d__Bacteria	p__Proteobacteria	c__Gammaproteobacteria	o__Pseudomonadales	f__Pseudomonadaceae	g__Pseudomonas	s__Pseudomonas_chlororaphis	OTU1314	6	0	1	10	41	7	6	3	23	1	18	21	6	1	42	11	3	5	5	4	1	7	38	45	13	20	8	346
d__Bacteria	k__norank_d__Bacteria	p__Proteobacteria	c__Gammaproteobacteria	o__Pseudomonadales	f__Pseudomonadaceae	g__Pseudomonas	s__Pseudomonas_cichorii	OTU1132	147	65	241	55	406	110	8	37	82	5	108	131	30	29	207	37	31	33	63	80	14	71	119	73	134	138	11	2465
d__Bacteria	k__norank_d__Bacteria	p__Proteobacteria	c__Gammaproteobacteria	o__Pseudomonadales	f__Pseudomonadaceae	g__Pseudomonas	s__Pseudomonas_parafulva	OTU2482	161	282	139	31	257	71	25	10	51	28	138	91	55	58	192	201	170	159	31	69	11	113	116	422	197	201	56	3335
d__Bacteria	k__norank_d__Bacteria	p__Proteobacteria	c__Gammaproteobacteria	o__Pseudomonadales	f__Pseudomonadaceae	g__Pseudomonas	s__unclassified_g__Pseudomonas	OTU1609	2	2	1	0	2	1	0	1	3	1	7	0	1	1	2	0	0	0	4	1	0	1	5	3	4	10	0	52
d__Bacteria	k__norank_d__Bacteria	p__Proteobacteria	c__Gammaproteobacteria	o__Pseudomonadales	f__Pseudomonadaceae	g__Pseudomonas	s__Pseudomonas_veronii	OTU3813	85	147	70	16	86	53	22	20	24	27	44	30	38	36	150	113	104	89	21	42	10	39	67	112	83	86	41	1655
d__Bacteria	k__norank_d__Bacteria	p__Proteobacteria	c__Gammaproteobacteria	o__Pseudomonadales	f__Pseudomonadaceae	g__Pseudomonas	s__Pseudomonas_pseudoalcaligenes_KF707__NBRC_110670	OTU1349	30	49	13	2	63	13	2	2	22	0	72	63	3	9	172	5	6	4	3	17	2	9	27	9	183	27	6	813
d__Bacteria	k__norank_d__Bacteria	p__Proteobacteria	c__Gammaproteobacteria	o__Pseudomonadales	f__Pseudomonadaceae	g__Pseudomonas	s__Pseudomonas_citronellolis	OTU95	7	8	31	3	3	13	4	1	4	1	17	2	3	1	34	2	0	5	2	0	3	15	5	6	38	6	12	226
d__Bacteria	k__norank_d__Bacteria	p__Proteobacteria	c__Gammaproteobacteria	o__Pseudomonadales	f__Pseudomonadaceae	g__Pseudomonas	s__Pseudomonas_xanthomarina_g__Pseudomonas	OTU1315	1	4	1	0	9	0	0	0	16	0	6	0	0	2	0	0	0	0	0	0	0	2	0	0	0	1	0	42
d__Bacteria	k__norank_d__Bacteria	p__Proteobacteria	c__Gammaproteobacteria	o__Pseudomonadales	f__Pseudomonadaceae	g__Pseudomonas	s__Pseudomonas_parafulva	OTU3640	86	169	94	28	637	41	7	28	83	10	383	308	29	51	182	77	40	26	47	91	11	56	157	60	144	191	9	3045
d__Bacteria	k__norank_d__Bacteria	p__Proteobacteria	c__Gammaproteobacteria	o__Pseudomonadales	f__Pseudomonadaceae	g__Pseudomonas	s__Pseudomonas_flexibilis	OTU3830	3	3	2	0	4	0	0	0	3	0	9	3	3	3	4	0	1	0	0	3	0	1	3	2	2	3	2	54
d__Bacteria	k__norank_d__Bacteria	p__Proteobacteria	c__Gammaproteobacteria	o__Pseudomonadales	f__Pseudomonadaceae	g__Pseudomonas	s__Pseudomonas_oryzae	OTU1755	11	2	0	0	8	13	0	0	3	0	5	7	0	0	32	2	0	0	0	1	0	2	2	2	1	5	0	96
d__Bacteria	k__norank_d__Bacteria	p__Bacteroidetes	c__Bacteroidia	o__Sphingobacteriales	f__Sphingobacteriaceae	g__Pseudopedobacter	s__uncultured_bacterium_g__Pseudopedobacter	OTU1541	1	0	1	14	10	5	5	5	6	2	1	4	9	0	6	3	0	0	3	2	1	2	1	2	0	1	0	84
d__Bacteria	k__norank_d__Bacteria	p__Proteobacteria	c__Alphaproteobacteria	o__Rhizobiales	f__Xanthobacteraceae	g__Pseudorhodoplanes	s__uncultured_bacterium_g__Pseudorhodoplanes	OTU1529	4	1	1	0	5	5	1	0	2	0	10	6	0	9	9	0	3	4	0	5	0	6	5	2	5	5	1	89
d__Bacteria	k__norank_d__Bacteria	p__Proteobacteria	c__Gammaproteobacteria	o__Xanthomonadales	f__Xanthomonadaceae	g__Pseudoxanthomonas	s__Pseudoxanthomonas_suwonensis	OTU3253	10	7	10	59	38	34	12	25	53	18	29	28	15	11	69	15	6	10	26	20	3	22	19	34	18	14	13	618
d__Bacteria	k__norank_d__Bacteria	p__Proteobacteria	c__Gammaproteobacteria	o__Xanthomonadales	f__Xanthomonadaceae	g__Pseudoxanthomonas	s__Pseudoxanthomonas_dokdonensis	OTU2921	3	1	2	2	0	5	7	0	6	22	2	3	3	1	6	0	0	0	8	0	2	3	15	10	2	4	2	109
d__Bacteria	k__norank_d__Bacteria	p__Proteobacteria	c__Gammaproteobacteria	o__Xanthomonadales	f__Xanthomonadaceae	g__Pseudoxanthomonas	s__Pseudoxanthomonas_mexicana	OTU237	37	21	17	714	102	408	134	428	633	186	97	162	105	29	398	33	39	43	393	76	103	87	185	172	97	300	57	5056
d__Bacteria	k__norank_d__Bacteria	p__Proteobacteria	c__Gammaproteobacteria	o__Pseudomonadales	f__Moraxellaceae	g__Psychrobacter	s__Psychrobacter_cibarius	OTU3824	31	71	37	10	24	23	12	6	8	19	28	5	15	10	42	57	53	52	7	23	0	28	30	20	52	48	17	728
d__Bacteria	k__norank_d__Bacteria	p__Proteobacteria	c__Gammaproteobacteria	o__Pseudomonadales	f__Moraxellaceae	g__Psychrobacter	s__unclassified_g__Psychrobacter	OTU4419	7	6	2	0	5	2	2	2	5	1	0	1	2	1	5	8	8	3	1	1	0	2	3	5	4	5	1	82
d__Bacteria	k__norank_d__Bacteria	p__Acidobacteria	c__Blastocatellia_Subgroup_4	o__Pyrinomonadales	f__Pyrinomonadaceae	g__RB41	s__metagenome_g__RB41	OTU972	7	13	5	2	11	0	2	1	1	2	49	26	1	27	7	4	1	18	3	18	2	42	12	10	45	2	0	311
d__Bacteria	k__norank_d__Bacteria	p__Acidobacteria	c__Blastocatellia_Subgroup_4	o__Pyrinomonadales	f__Pyrinomonadaceae	g__RB41	s__uncultured_Acidobacteriaceae_bacterium_g__RB41	OTU2588	30	26	4	1	83	10	1	0	5	2	80	88	7	97	30	17	19	58	2	28	6	144	20	28	141	6	6	939
d__Bacteria	k__norank_d__Bacteria	p__Acidobacteria	c__Blastocatellia_Subgroup_4	o__Pyrinomonadales	f__Pyrinomonadaceae	g__RB41	s__uncultured_Acidobacteria_bacterium_g__RB41	OTU3274	5	6	0	0	7	3	0	0	0	0	10	7	1	7	2	1	0	4	1	5	0	15	1	2	11	1	0	89
d__Bacteria	k__norank_d__Bacteria	p__Proteobacteria	c__Gammaproteobacteria	o__Betaproteobacteriales	f__Burkholderiaceae	g__Ramlibacter	s__unclassified_g__Ramlibacter	OTU2683	68	60	90	99	84	156	210	169	256	196	122	88	84	105	118	74	47	158	209	112	79	165	108	197	74	175	77	3380
d__Bacteria	k__norank_d__Bacteria	p__Proteobacteria	c__Alphaproteobacteria	o__Reyranellales	f__Reyranellaceae	g__Reyranella	s__metagenome_g__Reyranella	OTU907	4	5	4	1	3	5	4	1	3	2	2	4	4	5	11	2	1	3	5	4	3	13	8	7	17	6	5	132
d__Bacteria	k__norank_d__Bacteria	p__Proteobacteria	c__Alphaproteobacteria	o__Reyranellales	f__Reyranellaceae	g__Reyranella	s__metagenome_g__Reyranella	OTU2129	4	3	2	0	1	2	3	1	4	8	2	1	2	0	11	0	1	6	1	2	1	13	2	3	6	0	2	81
d__Bacteria	k__norank_d__Bacteria	p__Proteobacteria	c__Alphaproteobacteria	o__Reyranellales	f__Reyranellaceae	g__Reyranella	s__uncultured_bacterium_g__Reyranella	OTU2252	142	89	180	70	96	120	112	60	46	122	70	134	113	100	95	41	35	269	105	278	72	118	105	168	138	97	88	3063
d__Bacteria	k__norank_d__Bacteria	p__Proteobacteria	c__Alphaproteobacteria	o__Reyranellales	f__Reyranellaceae	g__Reyranella	s__uncultured_bacterium_g__Reyranella	OTU2491	14	14	17	3	5	9	10	4	13	12	14	4	8	18	16	7	5	15	8	18	7	23	12	13	21	12	12	314
d__Bacteria	k__norank_d__Bacteria	p__Proteobacteria	c__Gammaproteobacteria	o__Alteromonadales	f__Alteromonadaceae	g__Rheinheimera	s__Rheinheimera_aquimaris	OTU3818	4	1	0	61	65	6	0	5	6	1	17	52	7	2	7	16	8	5	3	24	3	8	11	20	44	52	0	428
d__Bacteria	k__norank_d__Bacteria	p__Proteobacteria	c__Gammaproteobacteria	o__Xanthomonadales	f__Rhodanobacteraceae	g__Rhodanobacter	s__Rhodanobacter_sp.	OTU59	787	341	1886	1865	372	2732	6645	3803	1072	2619	482	1259	8182	503	261	499	186	1627	2730	1502	10528	758	1105	1285	375	1504	5387	60295
d__Bacteria	k__norank_d__Bacteria	p__Proteobacteria	c__Gammaproteobacteria	o__Xanthomonadales	f__Rhodanobacteraceae	g__Rhodanobacter	s__uncultured_Xanthomonadaceae_bacterium_g__Rhodanobacter	OTU3033	16	4	45	35	4	10	43	11	8	29	5	5	26	21	2	9	1	20	18	20	14	24	10	4	23	23	15	445
d__Bacteria	k__norank_d__Bacteria	p__Proteobacteria	c__Gammaproteobacteria	o__Xanthomonadales	f__Rhodanobacteraceae	g__Rhodanobacter	s__uncultured_Xanthomonadaceae_bacterium_g__Rhodanobacter	OTU4546	7	1	17	29	0	4	14	0	4	15	0	0	11	4	6	1	0	5	17	0	18	12	1	4	6	0	7	183
d__Bacteria	k__norank_d__Bacteria	p__Proteobacteria	c__Gammaproteobacteria	o__Xanthomonadales	f__Rhodanobacteraceae	g__Rhodanobacter	s__unclassified_g__Rhodanobacter	OTU309	19	8	10	8	41	96	27	66	2	16	14	10	17	9	6	5	4	11	17	54	48	10	10	21	2	32	28	591
d__Bacteria	k__norank_d__Bacteria	p__Proteobacteria	c__Gammaproteobacteria	o__Xanthomonadales	f__Rhodanobacteraceae	g__Rhodanobacter	s__uncultured_Xanthomonadaceae_bacterium_g__Rhodanobacter	OTU3929	68	16	148	147	9	216	802	92	77	265	15	29	328	38	38	13	13	331	1097	28	918	225	27	28	81	90	295	5434
d__Bacteria	k__norank_d__Bacteria	p__Proteobacteria	c__Alphaproteobacteria	o__Rhodobacterales	f__Rhodobacteraceae	g__Rhodobacter	s__metagenome_g__Rhodobacter	OTU1463	0	1	0	3	15	4	2	1	11	16	5	3	9	1	45	1	0	3	3	1	0	18	2	46	22	8	0	220
d__Bacteria	k__norank_d__Bacteria	p__Actinobacteria	c__Actinobacteria	o__Corynebacteriales	f__Nocardiaceae	g__Rhodococcus	s__Rhodococcus_erythropolis	OTU3358	3	2	1	1	42	1	1	0	2	2	14	15	1	6	3	0	4	7	2	1	0	7	2	7	5	0	1	130
d__Bacteria	k__norank_d__Bacteria	p__Actinobacteria	c__Actinobacteria	o__Corynebacteriales	f__Nocardiaceae	g__Rhodococcus	s__Rhodococcus_wratislaviensis	OTU3703	1	1	0	1	3	0	0	0	0	2	7	2	1	0	1	1	0	4	2	2	1	6	3	1	3	0	0	42
d__Bacteria	k__norank_d__Bacteria	p__Planctomycetes	c__Planctomycetacia	o__Pirellulales	f__Pirellulaceae	g__Rhodopirellula	s__uncultured_bacterium_g__Rhodopirellula	OTU4636	2	2	1	0	6	1	2	0	3	1	2	3	1	1	4	5	10	0	1	4	1	2	3	2	3	1	0	61
d__Bacteria	k__norank_d__Bacteria	p__Planctomycetes	c__Planctomycetacia	o__Pirellulales	f__Pirellulaceae	g__Rhodopirellula	s__uncultured_Planctomycetaceae_bacterium_g__Rhodopirellula	OTU2709	4	1	0	1	10	0	1	2	0	3	11	13	2	5	5	8	2	3	0	1	0	12	0	5	37	2	2	130
d__Bacteria	k__norank_d__Bacteria	p__Planctomycetes	c__Planctomycetacia	o__Pirellulales	f__Pirellulaceae	g__Rhodopirellula	s__uncultured_planctomycete_g__Rhodopirellula	OTU785	0	2	0	2	2	2	0	0	3	1	6	5	6	2	4	1	0	6	0	1	0	2	1	4	5	2	0	57
d__Bacteria	k__norank_d__Bacteria	p__Planctomycetes	c__Planctomycetacia	o__Pirellulales	f__Pirellulaceae	g__Rhodopirellula	s__unclassified_g__Rhodopirellula	OTU1352	3	6	0	0	4	3	0	0	2	2	3	5	1	0	4	0	4	0	1	1	0	0	1	2	7	1	1	51
d__Bacteria	k__norank_d__Bacteria	p__Planctomycetes	c__Planctomycetacia	o__Pirellulales	f__Pirellulaceae	g__Rhodopirellula	s__uncultured_Planctomycetaceae_bacterium_g__Rhodopirellula	OTU691	1	0	1	0	9	0	0	0	2	1	8	7	0	7	11	0	0	4	0	0	0	4	0	5	5	0	0	65
d__Bacteria	k__norank_d__Bacteria	p__Planctomycetes	c__Planctomycetacia	o__Pirellulales	f__Pirellulaceae	g__Rhodopirellula	s__unclassified_g__Rhodopirellula	OTU3271	0	0	0	2	5	3	2	0	6	14	4	3	3	4	16	0	0	0	3	5	0	2	4	3	3	3	4	89
d__Bacteria	k__norank_d__Bacteria	p__Proteobacteria	c__Alphaproteobacteria	o__Rhizobiales	f__Xanthobacteraceae	g__Rhodoplanes	s__unclassified_g__Rhodoplanes	OTU632	9	9	1	0	12	5	2	1	4	3	13	7	5	6	11	3	5	14	1	7	0	13	7	5	16	4	4	167
d__Bacteria	k__norank_d__Bacteria	p__Proteobacteria	c__Alphaproteobacteria	o__Rhizobiales	f__Xanthobacteraceae	g__Rhodopseudomonas	s__unclassified_g__Rhodopseudomonas	OTU2746	0	0	0	0	5	2	1	0	0	0	2	2	1	1	2	2	0	5	0	0	0	8	0	0	2	0	0	33
d__Bacteria	k__norank_d__Bacteria	p__Proteobacteria	c__Alphaproteobacteria	o__Rhizobiales	f__Xanthobacteraceae	g__Rhodopseudomonas	s__Rhodopseudomonas_palustris_g__Rhodopseudomonas	OTU2799	3	2	0	4	28	10	3	1	1	2	20	18	4	3	8	10	5	17	4	3	3	16	13	6	17	2	3	206
d__Bacteria	k__norank_d__Bacteria	p__Proteobacteria	c__Alphaproteobacteria	o__Acetobacterales	f__Acetobacteraceae	g__Rhodovastum	s__uncultured_bacterium_g__Rhodovastum	OTU1584	3	1	12	10	3	13	60	8	3	31	0	2	94	2	3	1	1	41	23	11	96	3	1	9	3	5	87	526
d__Bacteria	k__norank_d__Bacteria	p__Firmicutes	c__Clostridia	o__Clostridiales	f__Peptostreptococcaceae	g__Romboutsia	s__uncultured_bacterium_g__Romboutsia	OTU4543	3	7	0	0	1	1	0	0	1	2	5	2	0	0	1	0	2	2	0	1	0	0	2	2	1	2	0	35
d__Bacteria	k__norank_d__Bacteria	p__Planctomycetes	c__Planctomycetacia	o__Pirellulales	f__Pirellulaceae	g__Roseimaritima	s__uncultured_bacterium_g__Roseimaritima	OTU3888	2	5	4	2	3	2	2	5	2	6	7	2	1	1	9	2	0	2	2	3	1	2	5	8	2	4	4	88
d__Bacteria	k__norank_d__Bacteria	p__Proteobacteria	c__Alphaproteobacteria	o__Acetobacterales	f__Acetobacteraceae	g__Roseomonas	s__unclassified_g__Roseomonas	OTU3836	7	5	5	4	28	34	3	3	20	16	19	22	6	13	69	5	2	8	11	8	1	23	16	7	36	11	6	388
d__Bacteria	k__norank_d__Bacteria	p__Proteobacteria	c__Alphaproteobacteria	o__Acetobacterales	f__Acetobacteraceae	g__Roseomonas	s__Roseomonas_lacus	OTU332	1	2	0	1	4	4	2	3	6	3	2	5	1	4	12	0	0	1	5	0	0	9	3	1	4	2	4	79
d__Bacteria	k__norank_d__Bacteria	p__Planctomycetes	c__Planctomycetacia	o__Planctomycetales	f__Rubinisphaeraceae	g__Rubinisphaera	s__uncultured_bacterium_g__Rubinisphaera	OTU681	0	0	0	0	3	0	0	0	4	0	0	2	0	0	6	0	0	0	0	2	0	1	0	1	5	0	0	24
d__Bacteria	k__norank_d__Bacteria	p__Firmicutes	c__Clostridia	o__Clostridiales	f__Ruminococcaceae	g__Ruminiclostridium	s__unclassified_g__Ruminiclostridium	OTU1627	1	2	4	0	0	3	1	4	1	2	1	4	6	3	2	4	3	8	0	0	1	2	4	5	3	1	4	69
d__Bacteria	k__norank_d__Bacteria	p__Firmicutes	c__Clostridia	o__Clostridiales	f__Ruminococcaceae	g__Ruminiclostridium_1	s__unclassified_g__Ruminiclostridium_1	OTU4344	1	4	1	0	2	8	1	0	2	1	2	0	2	0	5	7	3	2	1	2	0	3	3	8	1	1	1	61
d__Bacteria	k__norank_d__Bacteria	p__Firmicutes	c__Clostridia	o__Clostridiales	f__Ruminococcaceae	g__Ruminiclostridium_1	s__uncultured_Clostridiales_bacterium_g__Ruminiclostridium_1	OTU436	0	5	4	2	0	2	0	0	3	3	1	1	2	5	2	0	1	3	2	1	0	2	7	0	0	4	4	54
d__Bacteria	k__norank_d__Bacteria	p__Bacteroidetes	c__Bacteroidia	o__Bacteroidales	f__Marinilabiliaceae	g__Ruminofilibacter	s__uncultured_prokaryote_g__Ruminofilibacter	OTU1605	6	13	4	1	4	4	3	8	7	3	1	4	1	9	8	2	1	0	0	0	3	2	3	3	8	5	10	113
d__Bacteria	k__norank_d__Bacteria	p__Planctomycetes	c__Planctomycetacia	o__Planctomycetales	f__Rubinisphaeraceae	g__SH-PL14	s__uncultured_bacterium_g__SH-PL14	OTU2178	3	0	1	1	0	1	0	1	3	2	4	3	0	1	13	3	0	1	1	1	0	2	0	4	4	0	2	51
d__Bacteria	k__norank_d__Bacteria	p__Planctomycetes	c__Planctomycetacia	o__Planctomycetales	f__Rubinisphaeraceae	g__SH-PL14	s__uncultured_Planctomycetaceae_bacterium_g__SH-PL14	OTU1960	6	3	1	0	1	0	0	1	2	1	2	0	0	4	3	0	1	2	0	0	0	2	4	0	2	1	1	37
d__Bacteria	k__norank_d__Bacteria	p__Planctomycetes	c__Planctomycetacia	o__Planctomycetales	f__Rubinisphaeraceae	g__SH-PL14	s__unclassified_g__SH-PL14	OTU896	7	3	1	2	5	1	1	0	1	1	7	5	3	10	5	2	1	1	4	2	2	0	3	3	10	2	2	84
d__Bacteria	k__norank_d__Bacteria	p__Planctomycetes	c__Planctomycetacia	o__Planctomycetales	f__Rubinisphaeraceae	g__SH-PL14	s__uncultured_bacterium_g__SH-PL14	OTU2608	4	3	2	2	5	0	0	1	2	2	8	10	4	9	7	1	0	2	1	5	0	5	3	6	27	1	7	117
d__Bacteria	k__norank_d__Bacteria	p__Planctomycetes	c__Planctomycetacia	o__Planctomycetales	f__Rubinisphaeraceae	g__SH-PL14	s__uncultured_bacterium_g__SH-PL14	OTU125	1	0	0	1	2	0	1	1	0	1	1	2	1	1	10	1	0	1	2	0	0	7	3	3	7	3	3	52
d__Bacteria	k__norank_d__Bacteria	p__Planctomycetes	c__Planctomycetacia	o__Planctomycetales	f__Rubinisphaeraceae	g__SH-PL14	s__uncultured_bacterium_g__SH-PL14	OTU1236	13	20	4	3	13	6	1	1	3	4	22	19	4	14	9	6	2	2	2	19	1	8	7	12	25	7	7	234
d__Bacteria	k__norank_d__Bacteria	p__Planctomycetes	c__Planctomycetacia	o__Planctomycetales	f__Rubinisphaeraceae	g__SH-PL14	s__unclassified_g__SH-PL14	OTU2591	3	12	3	0	8	6	4	7	4	6	9	4	4	10	6	7	8	10	2	3	9	34	4	1	21	6	8	199
d__Bacteria	k__norank_d__Bacteria	p__Planctomycetes	c__Planctomycetacia	o__Planctomycetales	f__Rubinisphaeraceae	g__SH-PL14	s__uncultured_Planctomycetaceae_bacterium_g__SH-PL14	OTU2251	4	4	0	0	4	0	0	0	1	0	6	2	0	2	3	0	1	0	0	0	0	1	2	2	3	0	0	35
d__Bacteria	k__norank_d__Bacteria	p__Planctomycetes	c__Phycisphaerae	o__Phycisphaerales	f__Phycisphaeraceae	g__SM1A02	s__unclassified_g__SM1A02	OTU535	4	2	1	0	0	0	0	0	0	0	5	2	2	7	0	1	1	2	0	7	0	1	1	3	7	1	0	47
d__Bacteria	k__norank_d__Bacteria	p__Planctomycetes	c__Phycisphaerae	o__Phycisphaerales	f__Phycisphaeraceae	g__SM1A02	s__unclassified_g__SM1A02	OTU3335	0	2	1	0	1	0	0	1	0	0	2	2	0	1	4	0	0	1	0	0	0	0	2	2	1	4	2	26
d__Bacteria	k__norank_d__Bacteria	p__Planctomycetes	c__Phycisphaerae	o__Phycisphaerales	f__Phycisphaeraceae	g__SM1A02	s__uncultured_planctomycete_g__SM1A02	OTU3280	0	0	0	3	7	0	0	0	3	0	2	0	0	1	2	1	0	0	4	0	0	1	0	4	1	4	0	33
d__Bacteria	k__norank_d__Bacteria	p__Planctomycetes	c__Phycisphaerae	o__Phycisphaerales	f__Phycisphaeraceae	g__SM1A02	s__uncultured_bacterium_g__SM1A02	OTU3062	19	29	16	4	5	1	4	3	2	4	14	6	4	10	6	3	2	2	1	18	0	5	8	9	19	9	10	213
d__Bacteria	k__norank_d__Bacteria	p__Bacteroidetes	c__Bacteroidia	o__Flavobacteriales	f__Flavobacteriaceae	g__Salinimicrobium	s__unclassified_g__Salinimicrobium	OTU1682	4	0	9	0	1	2	0	0	0	0	0	0	4	0	0	0	0	0	0	0	1	0	0	0	0	0	4	25
d__Bacteria	k__norank_d__Bacteria	p__Bacteroidetes	c__Bacteroidia	o__Flavobacteriales	f__Flavobacteriaceae	g__Salinimicrobium	s__uncultured_Bacteroidetes_bacterium_g__Salinimicrobium	OTU695	8	4	6	0	3	0	1	1	1	3	2	2	2	6	1	0	0	0	1	2	0	1	0	3	0	1	1	49
d__Bacteria	k__norank_d__Bacteria	p__Bacteroidetes	c__Bacteroidia	o__Flavobacteriales	f__Flavobacteriaceae	g__Salinimicrobium	s__uncultured_bacterium_g__Salinimicrobium	OTU1388	1	2	0	1	15	2	1	2	16	0	2	4	3	3	8	2	1	2	1	3	1	1	4	4	0	8	1	88
d__Bacteria	k__norank_d__Bacteria	p__Bacteroidetes	c__Bacteroidia	o__Flavobacteriales	f__Flavobacteriaceae	g__Salinimicrobium	s__unclassified_g__Salinimicrobium	OTU3941	5	1	4	4	1	5	4	2	1	2	2	5	12	3	2	3	0	1	5	7	2	3	3	2	3	3	4	89
d__Bacteria	k__norank_d__Bacteria	p__Bacteroidetes	c__Bacteroidia	o__Flavobacteriales	f__Crocinitomicaceae	g__Salinirepens	s__uncultured_Bacteroidetes_bacterium_g__Salinirepens	OTU1669	5	9	1	0	2	0	0	1	0	0	4	3	0	5	0	0	0	0	0	3	0	0	0	1	7	2	3	46
d__Bacteria	k__norank_d__Bacteria	p__Proteobacteria	c__Deltaproteobacteria	o__Myxococcales	f__Sandaracinaceae	g__Sandaracinus	s__uncultured_bacterium_g__Sandaracinus	OTU3030	0	0	0	0	1	1	2	2	0	1	13	3	1	14	4	0	0	6	5	3	0	16	5	0	8	10	2	97
d__Bacteria	k__norank_d__Bacteria	p__Planctomycetes	c__Planctomycetacia	o__Planctomycetales	f__Schlesneriaceae	g__Schlesneria	s__uncultured_bacterium_g__Schlesneria	OTU2572	0	1	0	0	0	1	4	0	2	1	1	0	3	1	0	1	0	3	3	0	1	8	0	0	6	0	2	38
d__Bacteria	k__norank_d__Bacteria	p__Proteobacteria	c__Alphaproteobacteria	o__Rhodobacterales	f__Rhodobacteraceae	g__Seohaeicola	s__uncultured_bacterium_g__Seohaeicola	OTU4140	0	0	0	1	11	0	0	0	0	0	1	1	6	0	6	2	1	1	0	0	0	0	0	9	4	1	2	46
d__Bacteria	k__norank_d__Bacteria	p__Proteobacteria	c__Gammaproteobacteria	o__Enterobacteriales	f__Enterobacteriaceae	g__Serratia	s__Serratia_fonticola	OTU1393	20	7	7	1	16	0	0	0	0	2	5	5	2	4	2	7	12	6	0	2	2	6	3	4	13	2	2	130
d__Bacteria	k__norank_d__Bacteria	p__Rokubacteria	c__NC10	o__Methylomirabilales	f__Methylomirabilaceae	g__Sh765B-TzT-35	s__uncultured_bacterium_g__Sh765B-TzT-35	OTU3104	121	13	22	5	17	10	1	3	9	5	10	13	4	22	17	566	957	11	5	7	6	15	28	6	14	9	23	1919
d__Bacteria	k__norank_d__Bacteria	p__Proteobacteria	c__Gammaproteobacteria	o__Xanthomonadales	f__Xanthomonadaceae	g__Silanimonas	s__uncultured_gamma_proteobacterium_g__Silanimonas	OTU319	0	0	0	0	0	3	0	0	5	60	0	1	1	0	4	0	0	1	3	0	0	5	0	8	1	1	1	94
d__Bacteria	k__norank_d__Bacteria	p__Planctomycetes	c__Planctomycetacia	o__Isosphaerales	f__Isosphaeraceae	g__Singulisphaera	s__uncultured_Planctomycetales_bacterium_g__Singulisphaera	OTU572	1	1	0	1	2	0	0	0	0	0	1	6	1	1	0	4	0	5	1	1	0	3	2	3	4	1	1	39
d__Bacteria	k__norank_d__Bacteria	p__Planctomycetes	c__Planctomycetacia	o__Isosphaerales	f__Isosphaeraceae	g__Singulisphaera	s__Singulisphaera_acidiphila_DSM_18658	OTU3539	0	0	0	0	1	1	0	0	0	0	2	5	0	4	4	0	0	0	0	0	0	2	2	3	2	0	0	26
d__Bacteria	k__norank_d__Bacteria	p__Proteobacteria	c__Alphaproteobacteria	o__Azospirillales	f__Azospirillaceae	g__Skermanella	s__uncultured_bacterium_g__Skermanella	OTU4174	0	4	0	0	4	3	0	0	1	0	6	8	1	2	3	1	2	0	0	0	0	0	3	7	2	3	0	50
d__Bacteria	k__norank_d__Bacteria	p__Proteobacteria	c__Gammaproteobacteria	o__Salinisphaerales	f__Solimonadaceae	g__Solimonas	s__uncultured_bacterium_g__Solimonas	OTU3805	1	0	0	0	0	2	4	10	1	1	3	4	8	1	0	6	2	0	4	3	0	5	9	2	3	7	3	79
d__Bacteria	k__norank_d__Bacteria	p__Actinobacteria	c__Actinobacteria	o__Solirubrobacterales	f__Solirubrobacteraceae	g__Solirubrobacter	s__metagenome_g__Solirubrobacter	OTU3412	9	27	6	5	9	10	8	3	5	4	18	28	26	17	15	15	18	17	12	11	8	12	28	19	15	9	10	364
d__Bacteria	k__norank_d__Bacteria	p__Bacteroidetes	c__Bacteroidia	o__Sphingobacteriales	f__Sphingobacteriaceae	g__Solitalea	s__uncultured_Solitalea_sp.	OTU1115	0	0	0	1	1	3	2	1	3	13	1	1	0	0	2	2	0	4	2	0	0	3	0	5	1	1	0	46
d__Bacteria	k__norank_d__Bacteria	p__Bacteroidetes	c__Bacteroidia	o__Sphingobacteriales	f__Sphingobacteriaceae	g__Solitalea	s__Solitalea_canadensis	OTU1171	5	2	24	1	2	3	1	0	3	3	1	2	3	1	4	0	0	3	0	1	1	1	1	8	1	0	4	75
d__Bacteria	k__norank_d__Bacteria	p__Bacteroidetes	c__Bacteroidia	o__Sphingobacteriales	f__Sphingobacteriaceae	g__Sphingobacterium	s__unclassified_g__Sphingobacterium	OTU1536	0	0	0	9	7	8	0	2	1	0	0	1	3	0	1	5	1	0	2	1	0	0	1	3	0	0	0	45
d__Bacteria	k__norank_d__Bacteria	p__Bacteroidetes	c__Bacteroidia	o__Sphingobacteriales	f__Sphingobacteriaceae	g__Sphingobacterium	s__unclassified_g__Sphingobacterium	OTU1426	1	0	1	21	62	14	2	4	18	2	3	21	10	1	14	10	4	3	7	1	3	6	15	8	1	4	1	237
d__Bacteria	k__norank_d__Bacteria	p__Bacteroidetes	c__Bacteroidia	o__Sphingobacteriales	f__Sphingobacteriaceae	g__Sphingobacterium	s__Sphingobacterium_mizutaii	OTU4469	3	1	0	66	139	39	5	8	39	3	5	14	33	2	2	35	11	5	22	3	2	3	35	8	1	34	0	518
d__Bacteria	k__norank_d__Bacteria	p__Bacteroidetes	c__Bacteroidia	o__Sphingobacteriales	f__Sphingobacteriaceae	g__Sphingobacterium	s__Sphingobacterium_faecium	OTU4437	1	1	2	2	6	11	0	0	1	0	0	0	0	1	1	1	3	0	1	1	0	0	4	4	3	2	2	47
d__Bacteria	k__norank_d__Bacteria	p__Bacteroidetes	c__Bacteroidia	o__Sphingobacteriales	f__Sphingobacteriaceae	g__Sphingobacterium	s__unclassified_g__Sphingobacterium	OTU1534	1	0	1	5	3	2	3	2	1	3	2	1	2	2	0	11	0	3	2	0	1	1	1	1	0	5	0	53
d__Bacteria	k__norank_d__Bacteria	p__Bacteroidetes	c__Bacteroidia	o__Sphingobacteriales	f__Sphingobacteriaceae	g__Sphingobacterium	s__Sphingobacterium_multivorum	OTU838	42	7	102	45	28	133	22	11	30	8	27	17	23	12	2	32	13	29	18	13	16	8	45	15	4	12	5	719
d__Bacteria	k__norank_d__Bacteria	p__Proteobacteria	c__Alphaproteobacteria	o__Sphingomonadales	f__Sphingomonadaceae	g__Sphingomonas	s__unclassified_g__Sphingomonas	OTU214	4	2	1	0	3	3	1	0	0	1	7	5	0	4	1	9	1	13	0	1	1	4	1	3	8	1	0	74
d__Bacteria	k__norank_d__Bacteria	p__Proteobacteria	c__Alphaproteobacteria	o__Sphingomonadales	f__Sphingomonadaceae	g__Sphingopyxis	s__Sphingopyxis_macrogoltabida	OTU1334	2	0	0	0	45	4	1	0	0	1	10	18	1	5	0	26	0	10	0	4	0	8	4	8	10	0	0	157
d__Bacteria	k__norank_d__Bacteria	p__Proteobacteria	c__Alphaproteobacteria	o__Sphingomonadales	f__Sphingomonadaceae	g__Sphingopyxis	s__unclassified_g__Sphingopyxis	OTU1319	3	4	0	3	49	6	1	0	3	5	6	7	3	1	12	11	0	2	2	0	1	12	3	2	8	0	0	144
d__Bacteria	k__norank_d__Bacteria	p__Spirochaetes	c__Spirochaetia	o__Spirochaetales	f__Spirochaetaceae	g__Spirochaeta_2	s__unclassified_g__Spirochaeta_2	OTU4033	3	0	2	0	0	0	2	0	0	0	0	1	11	1	0	0	0	1	1	1	2	0	2	1	0	6	12	46
d__Bacteria	k__norank_d__Bacteria	p__Firmicutes	c__Clostridia	o__Clostridiales	f__Peptostreptococcaceae	g__Sporacetigenium	s__uncultured_bacterium_g__Sporacetigenium	OTU1387	3	2	0	2	5	3	1	1	0	2	2	1	0	2	2	8	8	5	1	1	1	4	0	1	1	2	0	58
d__Bacteria	k__norank_d__Bacteria	p__Bacteroidetes	c__Bacteroidia	o__Cytophagales	f__Cytophagaceae	g__Sporocytophaga	s__uncultured_bacterium_g__Sporocytophaga	OTU1525	9	9	6	8	13	13	5	14	18	9	26	34	4	24	33	3	6	21	18	12	1	21	33	31	19	17	14	421
d__Bacteria	k__norank_d__Bacteria	p__Bacteroidetes	c__Bacteroidia	o__Cytophagales	f__Cytophagaceae	g__Sporocytophaga	s__uncultured_bacterium_g__Sporocytophaga	OTU820	0	2	3	0	0	2	2	0	1	0	4	4	12	5	0	0	2	4	0	0	1	3	1	0	4	5	0	55
d__Bacteria	k__norank_d__Bacteria	p__Bacteroidetes	c__Bacteroidia	o__Cytophagales	f__Cytophagaceae	g__Sporocytophaga	s__uncultured_bacterium_g__Sporocytophaga	OTU782	0	0	3	0	0	1	0	1	1	1	4	3	0	3	4	0	2	3	0	1	0	14	1	3	15	3	2	65
d__Bacteria	k__norank_d__Bacteria	p__Bacteroidetes	c__Bacteroidia	o__Cytophagales	f__Cytophagaceae	g__Sporocytophaga	s__uncultured_bacterium_g__Sporocytophaga	OTU1563	1	6	4	20	22	14	9	78	52	25	33	120	14	33	30	2	2	5	35	31	3	32	39	41	24	80	26	781
d__Bacteria	k__norank_d__Bacteria	p__Bacteroidetes	c__Bacteroidia	o__Cytophagales	f__Cytophagaceae	g__Sporocytophaga	s__uncultured_bacterium_g__Sporocytophaga	OTU1565	2	1	0	1	0	9	15	2	0	6	0	1	13	0	0	0	0	5	8	0	12	1	1	8	2	2	2	91
d__Bacteria	k__norank_d__Bacteria	p__Acidobacteria	c__Blastocatellia_Subgroup_4	o__Blastocatellales	f__Blastocatellaceae	g__Stenotrophobacter	s__unclassified_g__Stenotrophobacter	OTU3368	3	0	5	0	0	2	1	1	2	2	8	6	0	2	4	3	1	5	0	6	0	2	4	7	6	4	4	78
d__Bacteria	k__norank_d__Bacteria	p__Proteobacteria	c__Gammaproteobacteria	o__Xanthomonadales	f__Xanthomonadaceae	g__Stenotrophomonas	s__Pseudomonas]_geniculata_g__Stenotrophomonas	OTU3273	312	57	772	1407	212	848	390	583	728	279	184	138	337	37	66	263	135	278	311	107	253	42	304	260	34	267	102	8706
d__Bacteria	k__norank_d__Bacteria	p__Proteobacteria	c__Gammaproteobacteria	o__Xanthomonadales	f__Xanthomonadaceae	g__Stenotrophomonas	s__unclassified_g__Stenotrophomonas	OTU3035	6	0	0	30	83	6	7	49	14	22	4	17	5	3	8	6	5	2	7	5	4	4	34	53	3	7	3	387
d__Bacteria	k__norank_d__Bacteria	p__Proteobacteria	c__Gammaproteobacteria	o__Steroidobacterales	f__Steroidobacteraceae	g__Steroidobacter	s__uncultured_bacterium_g__Steroidobacter	OTU1244	4	10	3	2	3	3	1	0	2	0	7	1	0	3	2	2	2	2	1	8	0	1	4	8	6	8	0	83
d__Bacteria	k__norank_d__Bacteria	p__Proteobacteria	c__Gammaproteobacteria	o__Steroidobacterales	f__Steroidobacteraceae	g__Steroidobacter	s__unclassified_g__Steroidobacter	OTU3803	52	152	60	13	49	35	29	26	22	25	89	73	19	62	55	15	24	61	21	59	13	116	52	60	100	54	41	1377
d__Bacteria	k__norank_d__Bacteria	p__Firmicutes	c__Bacilli	o__Lactobacillales	f__Streptococcaceae	g__Streptococcus	s__unclassified_g__Streptococcus	OTU213	1	3	0	2	1	0	3	0	2	0	1	0	2	1	3	6	4	9	0	2	0	1	1	4	4	4	2	56
d__Bacteria	k__norank_d__Bacteria	p__Firmicutes	c__Bacilli	o__Lactobacillales	f__Streptococcaceae	g__Streptococcus	s__unclassified_g__Streptococcus	OTU3804	4	3	2	0	2	2	1	0	0	1	9	2	2	1	2	7	3	4	2	3	0	2	0	1	3	2	1	59
d__Bacteria	k__norank_d__Bacteria	p__Actinobacteria	c__Actinobacteria	o__Streptomycetales	f__Streptomycetaceae	g__Streptomyces	s__unclassified_g__Streptomyces	OTU3231	13	2	2	5	5	3	2	0	1	4	2	5	10	2	0	9	4	15	5	15	3	8	5	10	3	1	2	136
d__Bacteria	k__norank_d__Bacteria	p__Actinobacteria	c__Actinobacteria	o__Streptomycetales	f__Streptomycetaceae	g__Streptomyces	s__unclassified_g__Streptomyces	OTU770	31	20	8	39	13	16	14	1	7	18	15	29	20	12	8	40	11	43	13	23	12	30	38	45	23	5	15	549
d__Bacteria	k__norank_d__Bacteria	p__Actinobacteria	c__Actinobacteria	o__Streptomycetales	f__Streptomycetaceae	g__Streptomyces	s__unclassified_g__Streptomyces	OTU79	13	5	2	3	5	8	25	0	3	1	10	52	3	4	4	7	3	12	4	38	11	8	7	8	6	4	7	253
d__Bacteria	k__norank_d__Bacteria	p__Acidobacteria	c__Thermoanaerobaculia	o__Thermoanaerobaculales	f__Thermoanaerobaculaceae	g__Subgroup_10	s__unclassified_g__Subgroup_10	OTU4145	5	0	0	0	1	0	0	1	2	0	1	0	0	0	0	39	83	0	0	1	0	0	4	0	0	0	0	137
d__Bacteria	k__norank_d__Bacteria	p__Acidobacteria	c__Thermoanaerobaculia	o__Thermoanaerobaculales	f__Thermoanaerobaculaceae	g__Subgroup_10	s__unclassified_g__Subgroup_10	OTU3064	22	66	3	2	26	4	2	2	5	5	25	15	3	32	16	4	17	1	3	23	1	4	15	10	10	11	2	329
d__Bacteria	k__norank_d__Bacteria	p__Acidobacteria	c__Thermoanaerobaculia	o__Thermoanaerobaculales	f__Thermoanaerobaculaceae	g__Subgroup_10	s__unclassified_g__Subgroup_10	OTU4566	7	15	6	2	11	9	0	4	9	6	18	13	2	19	12	12	15	7	2	17	1	14	16	3	9	8	5	242
d__Bacteria	k__norank_d__Bacteria	p__Acidobacteria	c__Thermoanaerobaculia	o__Thermoanaerobaculales	f__Thermoanaerobaculaceae	g__Subgroup_10	s__uncultured_Holophaga_sp._g__Subgroup_10	OTU824	2	5	0	1	9	1	0	0	2	0	7	6	1	6	0	7	3	0	1	3	0	2	1	3	3	0	0	63
d__Bacteria	k__norank_d__Bacteria	p__Acidobacteria	c__Thermoanaerobaculia	o__Thermoanaerobaculales	f__Thermoanaerobaculaceae	g__Subgroup_10	s__unclassified_g__Subgroup_10	OTU2824	2	0	0	0	7	3	1	0	0	0	4	3	0	6	7	1	0	0	0	0	0	13	0	3	9	2	1	62
d__Bacteria	k__norank_d__Bacteria	p__Acidobacteria	c__Thermoanaerobaculia	o__Thermoanaerobaculales	f__Thermoanaerobaculaceae	g__Subgroup_10	s__bacterium_3-5_YC-ZSS-LKJ-3024	OTU3047	30	70	8	1	19	0	0	1	1	5	1	1	1	8	6	1	1	5	1	5	0	1	5	21	3	8	4	207
d__Bacteria	k__norank_d__Bacteria	p__Acidobacteria	c__Thermoanaerobaculia	o__Thermoanaerobaculales	f__Thermoanaerobaculaceae	g__Subgroup_10	s__uncultured_prokaryote_g__Subgroup_10	OTU2950	29	53	10	0	25	7	1	5	17	1	37	21	4	41	9	19	17	5	4	29	4	25	21	12	36	13	2	447
d__Bacteria	k__norank_d__Bacteria	p__Acidobacteria	c__Thermoanaerobaculia	o__Thermoanaerobaculales	f__Thermoanaerobaculaceae	g__Subgroup_10	s__unclassified_g__Subgroup_10	OTU3193	1	21	0	0	10	0	0	0	0	0	11	0	0	0	0	0	4	0	0	1	0	0	3	2	0	2	0	55
d__Bacteria	k__norank_d__Bacteria	p__Acidobacteria	c__Thermoanaerobaculia	o__Thermoanaerobaculales	f__Thermoanaerobaculaceae	g__Subgroup_10	s__uncultured_soil_bacterium_g__Subgroup_10	OTU3952	19	16	6	1	27	5	3	3	9	4	21	16	5	18	14	12	19	8	8	11	4	22	15	10	18	10	5	309
d__Bacteria	k__norank_d__Bacteria	p__Acidobacteria	c__Thermoanaerobaculia	o__Thermoanaerobaculales	f__Thermoanaerobaculaceae	g__Subgroup_10	s__unclassified_g__Subgroup_10	OTU3291	6	8	1	1	7	0	1	0	2	0	10	6	2	17	4	3	3	2	1	9	0	7	3	4	11	4	3	115
d__Bacteria	k__norank_d__Bacteria	p__Acidobacteria	c__Thermoanaerobaculia	o__Thermoanaerobaculales	f__Thermoanaerobaculaceae	g__Subgroup_10	s__uncultured_prokaryote_g__Subgroup_10	OTU3093	30	28	13	2	10	4	4	13	7	7	18	4	5	15	12	13	7	9	5	14	9	49	7	6	29	15	10	345
d__Bacteria	k__norank_d__Bacteria	p__Acidobacteria	c__Thermoanaerobaculia	o__Thermoanaerobaculales	f__Thermoanaerobaculaceae	g__Subgroup_10	s__uncultured_soil_bacterium_g__Subgroup_10	OTU2945	3	5	1	0	4	1	0	2	2	0	2	2	0	7	6	4	27	0	3	4	0	8	9	4	3	1	6	104
d__Bacteria	k__norank_d__Bacteria	p__Acidobacteria	c__Thermoanaerobaculia	o__Thermoanaerobaculales	f__Thermoanaerobaculaceae	g__Subgroup_10	s__unclassified_g__Subgroup_10	OTU1942	7	3	0	0	8	2	0	0	0	0	6	1	0	6	4	4	75	0	2	5	0	2	2	0	1	3	0	131
d__Bacteria	k__norank_d__Bacteria	p__Acidobacteria	c__Thermoanaerobaculia	o__Thermoanaerobaculales	f__Thermoanaerobaculaceae	g__Subgroup_10	s__unclassified_g__Subgroup_10	OTU3730	1	4	1	2	5	3	0	2	6	0	2	1	1	5	6	3	29	1	2	8	0	8	4	1	2	2	2	101
d__Bacteria	k__norank_d__Bacteria	p__Acidobacteria	c__Thermoanaerobaculia	o__Thermoanaerobaculales	f__Thermoanaerobaculaceae	g__Subgroup_10	s__uncultured_prokaryote_g__Subgroup_10	OTU2678	6	10	4	0	3	0	1	2	2	2	4	3	2	8	4	8	5	3	1	2	2	8	3	0	8	0	1	92
d__Bacteria	k__norank_d__Bacteria	p__Acidobacteria	c__Thermoanaerobaculia	o__Thermoanaerobaculales	f__Thermoanaerobaculaceae	g__Subgroup_10	s__unclassified_g__Subgroup_10	OTU3025	2	8	0	0	8	0	0	4	0	0	1	0	0	0	0	0	1	0	0	8	1	1	1	1	0	1	0	37
d__Bacteria	k__norank_d__Bacteria	p__Acidobacteria	c__Thermoanaerobaculia	o__Thermoanaerobaculales	f__Thermoanaerobaculaceae	g__Subgroup_10	s__uncultured_prokaryote_g__Subgroup_10	OTU3276	27	68	1	2	28	4	0	1	10	0	40	18	1	24	8	2	3	3	0	13	0	15	21	21	24	4	1	339
d__Bacteria	k__norank_d__Bacteria	p__Acidobacteria	c__Thermoanaerobaculia	o__Thermoanaerobaculales	f__Thermoanaerobaculaceae	g__Subgroup_10	s__unclassified_g__Subgroup_10	OTU4544	0	3	1	0	7	0	0	0	2	1	1	1	0	6	1	1	2	1	0	2	0	0	0	1	0	4	0	34
d__Bacteria	k__norank_d__Bacteria	p__Proteobacteria	c__Gammaproteobacteria	o__Acidiferrobacterales	f__Acidiferrobacteraceae	g__Sulfurifustis	s__unclassified_g__Sulfurifustis	OTU3184	4	2	4	0	0	2	1	0	0	0	0	0	0	0	1	0	0	0	0	0	0	1	1	3	4	0	1	24
d__Bacteria	k__norank_d__Bacteria	p__Proteobacteria	c__Gammaproteobacteria	o__Acidiferrobacterales	f__Acidiferrobacteraceae	g__Sulfurifustis	s__uncultured_bacterium_g__Sulfurifustis	OTU4426	4	0	0	0	0	0	0	0	0	0	0	0	0	0	0	61	85	0	0	0	0	1	11	0	0	0	1	163
d__Bacteria	k__norank_d__Bacteria	p__Proteobacteria	c__Gammaproteobacteria	o__Acidiferrobacterales	f__Acidiferrobacteraceae	g__Sulfurifustis	s__unclassified_g__Sulfurifustis	OTU4436	130	16	7	2	18	5	1	3	13	3	8	18	4	8	15	230	563	5	3	13	0	16	34	5	7	5	20	1152
d__Bacteria	k__norank_d__Bacteria	p__Proteobacteria	c__Gammaproteobacteria	o__Xanthomonadales	f__Rhodanobacteraceae	g__Tahibacter	s__unclassified_g__Tahibacter	OTU4539	2	0	1	1	0	2	4	0	2	0	0	0	2	0	1	0	0	3	5	0	7	4	0	0	0	1	3	38
d__Bacteria	k__norank_d__Bacteria	p__Bacteroidetes	c__Bacteroidia	o__Chitinophagales	f__Chitinophagaceae	g__Taibaiella	s__unclassified_g__Taibaiella	OTU1566	1	0	0	10	8	18	1	5	0	1	2	7	0	1	0	5	1	0	9	1	1	1	3	0	0	0	0	75
d__Bacteria	k__norank_d__Bacteria	p__Bacteroidetes	c__Bacteroidia	o__Chitinophagales	f__Chitinophagaceae	g__Taibaiella	s__uncultured_bacterium_g__Taibaiella	OTU45	3	0	0	2	2	12	19	5	0	1	3	6	19	1	0	6	1	7	13	5	21	1	0	3	2	4	6	142
d__Bacteria	k__norank_d__Bacteria	p__Bacteroidetes	c__Bacteroidia	o__Chitinophagales	f__Chitinophagaceae	g__Taibaiella	s__uncultured_bacterium_g__Taibaiella	OTU2320	2	2	0	1	0	19	64	9	5	2	4	24	45	4	0	6	2	7	18	13	80	6	4	5	1	2	26	351
d__Bacteria	k__norank_d__Bacteria	p__Acidobacteria	c__Acidobacteriia	o__Acidobacteriales	f__Acidobacteriaceae_Subgroup_1	g__Terracidiphilus	s__uncultured_bacterium_g__Terracidiphilus	OTU2902	0	0	5	4	0	0	71	0	2	8	0	0	8	0	0	0	0	6	19	0	6	7	0	2	3	0	0	141
d__Bacteria	k__norank_d__Bacteria	p__Bacteroidetes	c__Bacteroidia	o__Chitinophagales	f__Chitinophagaceae	g__Terrimonas	s__unclassified_g__Terrimonas	OTU4531	2	0	1	1	0	5	5	2	4	2	0	0	2	5	1	0	0	8	4	1	5	12	2	0	4	0	2	68
d__Bacteria	k__norank_d__Bacteria	p__Bacteroidetes	c__Bacteroidia	o__Chitinophagales	f__Chitinophagaceae	g__Terrimonas	s__unclassified_g__Terrimonas	OTU1639	25	20	10	11	17	18	12	7	28	9	14	40	7	8	65	5	26	3	11	12	7	15	25	8	23	21	20	467
d__Bacteria	k__norank_d__Bacteria	p__Proteobacteria	c__Gammaproteobacteria	o__Betaproteobacteriales	f__Rhodocyclaceae	g__Thauera	s__uncultured_Rhodocyclaceae_bacterium_g__Thauera	OTU2708	3	6	0	0	10	0	0	0	28	0	9	18	0	1	10	0	5	1	0	11	2	5	0	1	4	3	0	117
d__Bacteria	k__norank_d__Bacteria	p__Proteobacteria	c__Gammaproteobacteria	o__Xanthomonadales	f__Xanthomonadaceae	g__Thermomonas	s__Thermomonas_brevis	OTU3218	3	1	10	133	21	26	27	536	133	43	30	23	55	11	20	16	10	13	200	45	32	25	62	44	12	46	7	1584
d__Bacteria	k__norank_d__Bacteria	p__Proteobacteria	c__Gammaproteobacteria	o__Xanthomonadales	f__Xanthomonadaceae	g__Thermomonas	s__unclassified_g__Thermomonas	OTU1817	20	5	48	349	110	201	57	429	635	409	69	131	75	33	185	69	31	51	468	88	37	68	179	116	35	135	46	4079
d__Bacteria	k__norank_d__Bacteria	p__Proteobacteria	c__Gammaproteobacteria	o__Betaproteobacteriales	f__Hydrogenophilaceae	g__Thiobacillus	s__Thiobacillus_thioparus_g__Thiobacillus	OTU3928	20	12	8	10	23	16	18	6	18	5	18	12	5	29	12	50	75	10	9	12	26	21	20	2	12	20	10	479
d__Bacteria	k__norank_d__Bacteria	p__Proteobacteria	c__Alphaproteobacteria	o__Rhodobacterales	f__Rhodobacteraceae	g__Tropicimonas	s__uncultured_bacterium_g__Tropicimonas	OTU3485	0	0	0	0	2	0	0	0	1	0	0	4	1	1	11	4	0	1	0	0	0	0	1	1	5	1	1	34
d__Bacteria	k__norank_d__Bacteria	p__Deinococcus-Thermus	c__Deinococci	o__Deinococcales	f__Trueperaceae	g__Truepera	s__uncultured_bacterium_g__Truepera	OTU634	8	4	6	1	2	1	2	2	2	8	9	2	0	11	5	0	5	3	0	19	1	0	2	8	3	7	2	113
d__Bacteria	k__norank_d__Bacteria	p__Deinococcus-Thermus	c__Deinococci	o__Deinococcales	f__Trueperaceae	g__Truepera	s__uncultured_bacterium_g__Truepera	OTU3718	7	13	16	2	10	1	1	5	6	12	7	2	0	10	10	3	2	5	1	17	4	7	5	5	13	8	9	181
d__Bacteria	k__norank_d__Bacteria	p__Deinococcus-Thermus	c__Deinococci	o__Deinococcales	f__Trueperaceae	g__Truepera	s__uncultured_bacterium_g__Truepera	OTU607	19	27	21	4	31	6	5	18	20	25	58	27	5	56	23	3	7	9	5	84	3	9	23	20	29	67	10	614
d__Bacteria	k__norank_d__Bacteria	p__Deinococcus-Thermus	c__Deinococci	o__Deinococcales	f__Trueperaceae	g__Truepera	s__unclassified_g__Truepera	OTU564	5	5	2	0	3	3	2	4	2	6	3	2	1	2	3	3	0	1	1	0	0	2	4	1	7	5	1	68
d__Bacteria	k__norank_d__Bacteria	p__Deinococcus-Thermus	c__Deinococci	o__Deinococcales	f__Trueperaceae	g__Truepera	s__uncultured_bacterium_g__Truepera	OTU2377	2	1	2	1	1	1	1	0	3	2	1	1	0	1	1	0	0	1	1	10	0	1	6	0	3	3	1	44
d__Bacteria	k__norank_d__Bacteria	p__Firmicutes	c__Bacilli	o__Bacillales	f__Alicyclobacillaceae	g__Tumebacillus	s__unclassified_g__Tumebacillus	OTU1231	11	17	27	4	10	14	10	3	9	18	10	11	10	5	13	10	12	41	13	11	9	11	9	28	18	7	14	355
d__Bacteria	k__norank_d__Bacteria	p__Firmicutes	c__Bacilli	o__Bacillales	f__Alicyclobacillaceae	g__Tumebacillus	s__uncultured_bacterium_g__Tumebacillus	OTU2246	12	12	9	2	3	6	55	3	4	6	4	5	9	3	3	4	4	9	15	5	15	5	5	13	11	5	2	229
d__Bacteria	k__norank_d__Bacteria	p__Firmicutes	c__Bacilli	o__Bacillales	f__Alicyclobacillaceae	g__Tumebacillus	s__unclassified_g__Tumebacillus	OTU2160	30	35	23	10	5	6	23	3	13	38	13	11	12	9	4	6	15	10	11	12	7	7	15	15	11	11	8	363
d__Bacteria	k__norank_d__Bacteria	p__Bacteroidetes	c__Bacteroidia	o__Cytophagales	f__Cyclobacteriaceae	g__Tunicatimonas	s__uncultured_bacterium_g__Tunicatimonas	OTU1119	6	2	1	0	0	0	0	1	3	1	1	3	2	2	1	1	0	1	1	1	0	2	1	4	1	0	5	40
d__Bacteria	k__norank_d__Bacteria	p__Firmicutes	c__Erysipelotrichia	o__Erysipelotrichales	f__Erysipelotrichaceae	g__Turicibacter	s__unclassified_g__Turicibacter	OTU1279	9	13	7	0	2	5	1	3	6	3	11	2	3	5	2	5	2	6	4	4	2	6	5	9	8	3	2	128
d__Bacteria	k__norank_d__Bacteria	p__Cyanobacteria	c__Oxyphotobacteria	o__Nostocales	f__Phormidiaceae	g__Tychonema_CCAP_1459-11B	s__uncultured_bacterium_g__Tychonema_CCAP_1459-11B	OTU3326	0	2	0	0	9	1	0	1	16	104	1	0	16	1	198	0	0	1	7	1	0	1	0	20	6	11	10	406
d__Bacteria	k__norank_d__Bacteria	p__Proteobacteria	c__Gammaproteobacteria	o__Betaproteobacteriales	f__Methylophilaceae	g__UBA6140	s__uncultured_bacterium_g__UBA6140	OTU3414	36	11	7	7	6	4	2	5	0	8	7	8	7	9	3	7	1	8	10	5	3	6	8	13	8	3	5	197
d__Bacteria	k__norank_d__Bacteria	p__Bacteroidetes	c__Bacteroidia	o__Chitinophagales	f__Chitinophagaceae	g__UTBCD1	s__uncultured_bacterium_g__UTBCD1	OTU2194	53	11	174	31	3	5	30	29	12	69	6	9	30	34	16	4	2	19	15	55	36	36	53	7	28	48	65	880
d__Bacteria	k__norank_d__Bacteria	p__Bacteroidetes	c__Bacteroidia	o__Chitinophagales	f__Chitinophagaceae	g__UTBCD1	s__uncultured_bacterium_g__UTBCD1	OTU832	1	6	3	3	1	3	3	7	11	5	9	14	4	7	17	0	2	1	5	3	1	3	13	11	1	12	11	157
d__Bacteria	k__norank_d__Bacteria	p__Chloroflexi	c__Anaerolineae	o__Anaerolineales	f__Anaerolineaceae	g__UTCFX1	s__unclassified_g__UTCFX1	OTU1361	7	8	1	1	5	4	0	0	1	2	11	2	2	0	6	8	8	1	1	1	0	1	1	4	10	1	2	88
d__Bacteria	k__norank_d__Bacteria	p__Chloroflexi	c__Anaerolineae	o__Anaerolineales	f__Anaerolineaceae	g__UTCFX1	s__uncultured_Chloroflexi_bacterium_g__UTCFX1	OTU2928	189	273	29	19	174	47	13	7	61	19	239	183	43	173	121	263	275	58	29	113	15	167	133	116	162	76	66	3063
d__Bacteria	k__norank_d__Bacteria	p__Proteobacteria	c__Gammaproteobacteria	o__Betaproteobacteriales	f__Burkholderiaceae	g__Undibacterium	s__uncultured_beta_proteobacterium_g__Undibacterium	OTU2271	0	0	1	0	1	1	7	2	2	3	1	2	11	2	1	3	0	5	21	7	5	24	2	5	8	8	9	131
d__Bacteria	k__norank_d__Bacteria	p__Planctomycetes	c__Phycisphaerae	o__Phycisphaerales	f__Phycisphaeraceae	g__Urania-1B-19_marine_sediment_group	s__uncultured_bacterium_g__Urania-1B-19_marine_sediment_group	OTU480	2	1	0	0	0	2	0	0	0	1	2	2	0	5	0	15	10	2	1	2	0	1	0	0	0	1	0	47
d__Bacteria	k__norank_d__Bacteria	p__Planctomycetes	c__Phycisphaerae	o__Phycisphaerales	f__Phycisphaeraceae	g__Urania-1B-19_marine_sediment_group	s__unclassified_g__Urania-1B-19_marine_sediment_group	OTU1642	8	11	10	1	8	5	0	10	4	0	2	5	1	10	1	68	33	2	0	8	1	6	3	2	4	5	10	218
d__Bacteria	k__norank_d__Bacteria	p__Firmicutes	c__Bacilli	o__Lactobacillales	f__Enterococcaceae	g__Vagococcus	s__unclassified_g__Vagococcus	OTU638	216	12	191	2	1	4	2	0	3	0	2	2	4	0	2	2	1	1	0	1	0	1	0	2	1	0	1	451
d__Bacteria	k__norank_d__Bacteria	p__Proteobacteria	c__Gammaproteobacteria	o__Betaproteobacteriales	f__Burkholderiaceae	g__Variovorax	s__metagenome_g__Variovorax	OTU1791	2	0	0	1	0	0	0	2	1	1	0	2	2	0	9	2	0	2	15	1	4	9	0	3	1	0	4	61
d__Bacteria	k__norank_d__Bacteria	p__Proteobacteria	c__Gammaproteobacteria	o__Betaproteobacteriales	f__Burkholderiaceae	g__Verticia	s__uncultured_bacterium_g__Verticia	OTU4316	2	1	0	2	13	0	1	2	5	1	0	2	1	1	1	3	0	0	1	1	0	1	2	3	0	2	0	45
d__Bacteria	k__norank_d__Bacteria	p__Acidobacteria	c__Subgroup_6	o__unclassified	f__unclassified_c__Subgroup_6	g__Vicinamibacter	s__unclassified_g__Vicinamibacter	OTU3398	13	10	6	3	33	17	9	5	8	4	22	17	6	14	47	7	6	17	9	9	4	26	10	11	17	13	12	355
d__Bacteria	k__norank_d__Bacteria	p__Acidobacteria	c__Subgroup_6	o__unclassified	f__unclassified_c__Subgroup_6	g__Vicinamibacter	s__uncultured_bacterium_g__Vicinamibacter	OTU2920	13	21	12	1	14	8	2	2	6	5	11	16	4	25	11	22	22	9	3	16	1	19	26	15	11	6	7	308
d__Bacteria	k__norank_d__Bacteria	p__Proteobacteria	c__Deltaproteobacteria	o__Myxococcales	f__Vulgatibacteraceae	g__Vulgatibacter	s__unclassified_g__Vulgatibacter	OTU2941	1	4	0	0	3	2	0	1	2	0	9	0	1	7	1	0	3	0	0	2	1	5	3	0	8	1	0	54
d__Bacteria	k__norank_d__Bacteria	p__Bacteroidetes	c__Bacteroidia	o__Flavobacteriales	f__Crocinitomicaceae	g__Wandonia	s__uncultured_bacterium_g__Wandonia	OTU1528	0	0	0	0	1	1	3	15	0	2	1	0	1	1	0	0	0	0	1	1	5	0	1	0	0	0	4	37
d__Bacteria	k__norank_d__Bacteria	p__Proteobacteria	c__Gammaproteobacteria	o__Steroidobacterales	f__Woeseiaceae	g__Woeseia	s__uncultured_bacterium_g__Woeseia	OTU3010	7	15	4	0	31	3	2	3	4	1	29	20	0	15	12	3	6	2	3	20	0	6	8	15	6	27	2	244
d__Bacteria	k__norank_d__Bacteria	p__Proteobacteria	c__Gammaproteobacteria	o__Steroidobacterales	f__Woeseiaceae	g__Woeseia	s__uncultured_bacterium_g__Woeseia	OTU3808	14	30	17	4	14	4	0	3	5	7	19	5	4	12	4	7	0	1	1	31	0	2	7	13	3	18	5	230
d__Bacteria	k__norank_d__Bacteria	p__Proteobacteria	c__Gammaproteobacteria	o__Betaproteobacteriales	f__Burkholderiaceae	g__Xenophilus	s__uncultured_bacterium_g__Xenophilus	OTU650	3	0	0	12	4	13	4	5	12	0	4	9	1	0	8	1	1	1	11	3	1	2	1	6	0	0	4	106
d__Bacteria	k__norank_d__Bacteria	p__Actinobacteria	c__Actinobacteria	o__Micrococcales	f__Microbacteriaceae	g__Yonghaparkia	s__unclassified_g__Yonghaparkia	OTU1014	3	3	4	1	10	4	1	1	3	29	1	11	23	7	31	5	0	2	5	4	1	7	16	32	13	5	27	249
d__Bacteria	k__norank_d__Bacteria	p__Planctomycetes	c__Planctomycetacia	o__Gemmatales	f__Gemmataceae	g__Zavarzinella	s__unclassified_g__Zavarzinella	OTU2232	2	13	4	2	10	2	1	3	4	3	7	6	1	9	7	1	0	5	0	2	1	8	3	10	7	4	2	117
d__Bacteria	k__norank_d__Bacteria	p__Proteobacteria	c__Alphaproteobacteria	o__Rhizobiales	f__Beijerinckiaceae	g__alphaI_cluster	s__uncultured_bacterium_g__alphaI_cluster	OTU982	0	2	1	0	0	0	1	0	1	0	0	4	1	1	1	0	1	5	0	2	0	5	2	0	8	2	0	37
d__Bacteria	k__norank_d__Bacteria	p__Proteobacteria	c__Gammaproteobacteria	o__Betaproteobacteriales	f__Nitrosomonadaceae	g__mle1-7	s__unclassified_g__mle1-7	OTU3930	6	6	15	2	9	18	5	12	16	13	5	7	3	11	10	3	14	2	12	5	4	8	5	5	3	10	17	226
d__Bacteria	k__norank_d__Bacteria	p__Proteobacteria	c__Gammaproteobacteria	o__Betaproteobacteriales	f__Nitrosomonadaceae	g__mle1-7	s__unclassified_g__mle1-7	OTU3902	5	7	2	1	7	0	0	2	6	1	5	1	2	5	5	2	7	3	0	4	3	2	4	4	0	2	5	85
d__Bacteria	k__norank_d__Bacteria	p__Proteobacteria	c__Gammaproteobacteria	o__Betaproteobacteriales	f__Nitrosomonadaceae	g__mle1-7	s__unclassified_g__mle1-7	OTU4061	40	38	46	7	21	26	6	9	21	26	26	16	7	18	26	33	42	17	9	33	5	12	19	21	16	31	27	598
d__Bacteria	k__norank_d__Bacteria	p__Proteobacteria	c__Gammaproteobacteria	o__Betaproteobacteriales	f__Nitrosomonadaceae	g__mle1-7	s__uncultured_beta_proteobacterium_g__mle1-7	OTU3431	3	5	6	2	3	4	1	6	8	2	5	2	0	1	2	3	5	4	5	5	4	6	4	7	4	7	3	107
d__Bacteria	k__norank_d__Bacteria	p__Proteobacteria	c__Gammaproteobacteria	o__Betaproteobacteriales	f__Nitrosomonadaceae	g__mle1-7	s__uncultured_beta_proteobacterium_g__mle1-7	OTU3256	1	3	3	2	0	1	4	1	3	3	5	3	0	4	8	0	0	1	2	5	2	0	6	1	5	1	1	65
d__Bacteria	k__norank_d__Bacteria	p__Proteobacteria	c__Gammaproteobacteria	o__Betaproteobacteriales	f__Nitrosomonadaceae	g__mle1-7	s__uncultured_Rhodocyclaceae_bacterium_g__mle1-7	OTU3697	0	2	8	3	0	2	8	1	0	3	0	1	6	1	3	1	1	10	5	0	8	12	1	7	10	1	1	95
d__Bacteria	k__norank_d__Bacteria	p__Proteobacteria	c__Gammaproteobacteria	o__Betaproteobacteriales	f__Nitrosomonadaceae	g__mle1-7	s__unclassified_g__mle1-7	OTU4003	3	2	4	1	0	0	0	1	3	4	1	0	1	5	1	11	15	2	0	1	1	1	1	0	1	0	8	67
d__Bacteria	k__norank_d__Bacteria	p__Proteobacteria	c__Gammaproteobacteria	o__Betaproteobacteriales	f__Nitrosomonadaceae	g__mle1-7	s__unclassified_g__mle1-7	OTU2856	7	18	13	8	5	11	9	6	18	16	5	4	2	7	10	8	13	7	10	15	10	5	5	10	6	0	12	240
d__Bacteria	k__norank_d__Bacteria	p__Nitrospirae	c__4-29-1	o__norank_c__4-29-1	f__norank_c__4-29-1	g__norank_c__4-29-1	s__uncultured_bacterium_g__norank_c__4-29-1	OTU3005	12	8	4	1	5	1	1	1	1	3	7	5	1	7	4	123	84	3	0	4	2	2	10	6	2	4	7	308
d__Bacteria	k__norank_d__Bacteria	p__Nitrospirae	c__4-29-1	o__norank_c__4-29-1	f__norank_c__4-29-1	g__norank_c__4-29-1	s__unclassified_g__norank_c__4-29-1	OTU1871	12	11	3	1	5	1	0	4	2	0	1	2	0	1	4	104	139	2	1	3	0	3	1	2	1	3	6	312
d__Bacteria	k__norank_d__Bacteria	p__Nitrospirae	c__4-29-1	o__norank_c__4-29-1	f__norank_c__4-29-1	g__norank_c__4-29-1	s__uncultured_bacterium_g__norank_c__4-29-1	OTU3913	8	4	2	2	7	2	0	1	4	2	2	0	0	2	2	84	38	1	0	1	0	2	3	0	4	0	8	179
d__Bacteria	k__norank_d__Bacteria	p__Actinobacteria	c__Actinobacteria	o__norank_c__Actinobacteria	f__norank_c__Actinobacteria	g__norank_c__Actinobacteria	s__Aciditerrimonas_ferrireducens_g__norank	OTU653	5	2	0	2	3	2	2	0	0	3	7	5	3	5	1	4	1	22	1	2	1	6	8	6	9	0	1	101
d__Bacteria	k__norank_d__Bacteria	p__Actinobacteria	c__Actinobacteria	o__norank_c__Actinobacteria	f__norank_c__Actinobacteria	g__norank_c__Actinobacteria	s__uncultured_Firmicutes_bacterium_g__norank_c__Actinobacteria	OTU2419	3	4	3	0	9	0	0	2	0	1	8	11	1	7	1	9	8	2	1	8	1	5	7	0	4	4	2	101
d__Bacteria	k__norank_d__Bacteria	p__Actinobacteria	c__Actinobacteria	o__norank_c__Actinobacteria	f__norank_c__Actinobacteria	g__norank_c__Actinobacteria	s__unclassified_g__norank_c__Actinobacteria	OTU3577	2	4	1	0	2	1	2	0	1	0	3	5	2	6	4	0	1	4	1	1	1	7	5	7	9	3	1	73
d__Bacteria	k__norank_d__Bacteria	p__Actinobacteria	c__Actinobacteria	o__norank_c__Actinobacteria	f__norank_c__Actinobacteria	g__norank_c__Actinobacteria	s__unclassified_g__norank_c__Actinobacteria	OTU1712	7	17	6	3	10	12	2	2	8	2	17	16	4	16	5	7	15	6	3	4	3	9	11	8	7	1	8	209
d__Bacteria	k__norank_d__Bacteria	p__Actinobacteria	c__Actinobacteria	o__norank_c__Actinobacteria	f__norank_c__Actinobacteria	g__norank_c__Actinobacteria	s__unclassified_g__norank_c__Actinobacteria	OTU3604	10	13	4	1	9	9	2	2	5	9	16	8	3	8	11	7	5	1	2	6	3	5	16	2	2	8	4	171
d__Bacteria	k__norank_d__Bacteria	p__Actinobacteria	c__Actinobacteria	o__norank_c__Actinobacteria	f__norank_c__Actinobacteria	g__norank_c__Actinobacteria	s__Actinobacteria_bacterium_RBG_19FT_COMBO_70_19	OTU478	15	29	12	1	22	12	2	8	12	9	36	22	3	33	20	11	13	9	8	27	3	12	42	15	15	15	22	428
d__Bacteria	k__norank_d__Bacteria	p__Proteobacteria	c__Alphaproteobacteria	o__norank_c__Alphaproteobacteria	f__norank_c__Alphaproteobacteria	g__norank_c__Alphaproteobacteria	s__unclassified_g__norank_c__Alphaproteobacteria	OTU1600	7	12	14	7	15	12	16	2	15	15	17	10	16	16	15	2	8	17	20	19	9	21	5	9	31	18	12	360
d__Bacteria	k__norank_d__Bacteria	p__Proteobacteria	c__Alphaproteobacteria	o__norank_c__Alphaproteobacteria	f__norank_c__Alphaproteobacteria	g__norank_c__Alphaproteobacteria	s__unclassified_g__norank_c__Alphaproteobacteria	OTU2215	4	0	1	0	4	0	0	0	2	0	2	0	1	5	1	13	5	3	0	3	0	6	1	1	5	1	2	60
d__Bacteria	k__norank_d__Bacteria	p__Proteobacteria	c__Alphaproteobacteria	o__norank_c__Alphaproteobacteria	f__norank_c__Alphaproteobacteria	g__norank_c__Alphaproteobacteria	s__Alphaproteobacteria_bacterium_g__norank	OTU1230	1	1	1	2	2	0	1	0	0	0	0	6	3	2	3	1	2	0	0	3	2	0	1	3	0	1	1	36
d__Bacteria	k__norank_d__Bacteria	p__Proteobacteria	c__Alphaproteobacteria	o__norank_c__Alphaproteobacteria	f__norank_c__Alphaproteobacteria	g__norank_c__Alphaproteobacteria	s__unclassified_g__norank_c__Alphaproteobacteria	OTU2328	10	8	1	0	4	2	0	6	3	2	7	3	3	14	4	30	40	1	3	7	1	8	7	2	13	3	6	188
d__Bacteria	k__norank_d__Bacteria	p__Proteobacteria	c__Alphaproteobacteria	o__norank_c__Alphaproteobacteria	f__norank_c__Alphaproteobacteria	g__norank_c__Alphaproteobacteria	s__uncultured_Rhodobacteraceae_bacterium_g__norank_c__Alphaproteobacteria	OTU503	215	354	121	18	129	15	16	16	37	42	139	82	36	182	58	23	23	48	11	214	6	39	86	84	87	84	43	2208
d__Bacteria	k__norank_d__Bacteria	p__Proteobacteria	c__Alphaproteobacteria	o__norank_c__Alphaproteobacteria	f__norank_c__Alphaproteobacteria	g__norank_c__Alphaproteobacteria	s__unclassified_g__norank_c__Alphaproteobacteria	OTU3831	13	13	24	4	6	16	28	25	22	14	13	7	8	17	18	14	29	18	19	9	16	34	13	13	14	12	12	431
d__Bacteria	k__norank_d__Bacteria	p__Proteobacteria	c__Alphaproteobacteria	o__norank_c__Alphaproteobacteria	f__norank_c__Alphaproteobacteria	g__norank_c__Alphaproteobacteria	s__uncultured_alpha_proteobacterium_g__norank_c__Alphaproteobacteria	OTU3819	3	2	3	1	3	0	2	1	0	1	5	1	2	10	8	4	1	3	2	2	1	5	1	7	5	5	3	81
d__Bacteria	k__norank_d__Bacteria	p__Proteobacteria	c__Alphaproteobacteria	o__norank_c__Alphaproteobacteria	f__norank_c__Alphaproteobacteria	g__norank_c__Alphaproteobacteria	s__uncultured_Rhodospirillaceae_bacterium_g__norank_c__Alphaproteobacteria	OTU2357	11	12	9	2	12	6	5	1	4	1	14	8	14	20	4	13	8	14	6	18	1	15	8	7	15	5	4	237
d__Bacteria	k__norank_d__Bacteria	p__Proteobacteria	c__Alphaproteobacteria	o__norank_c__Alphaproteobacteria	f__norank_c__Alphaproteobacteria	g__norank_c__Alphaproteobacteria	s__unclassified_g__norank_c__Alphaproteobacteria	OTU2168	10	11	3	0	16	8	8	2	0	5	10	26	10	20	14	8	3	37	4	42	9	43	18	20	52	11	8	398
d__Bacteria	k__norank_d__Bacteria	p__Proteobacteria	c__Alphaproteobacteria	o__norank_c__Alphaproteobacteria	f__norank_c__Alphaproteobacteria	g__norank_c__Alphaproteobacteria	s__unclassified_g__norank_c__Alphaproteobacteria	OTU1201	16	13	4	3	3	9	5	0	4	7	4	2	3	17	8	0	0	9	5	4	2	7	4	6	11	5	1	152
d__Bacteria	k__norank_d__Bacteria	p__Proteobacteria	c__Alphaproteobacteria	o__norank_c__Alphaproteobacteria	f__norank_c__Alphaproteobacteria	g__norank_c__Alphaproteobacteria	s__uncultured_Rhodospirillaceae_bacterium_g__norank_c__Alphaproteobacteria	OTU4372	1	3	0	0	4	1	3	0	1	1	10	1	1	5	5	7	11	1	0	0	0	1	1	3	4	3	0	67
d__Bacteria	k__norank_d__Bacteria	p__Proteobacteria	c__Alphaproteobacteria	o__norank_c__Alphaproteobacteria	f__norank_c__Alphaproteobacteria	g__norank_c__Alphaproteobacteria	s__uncultured_soil_bacterium_g__norank_c__Alphaproteobacteria	OTU4434	7	15	2	0	9	3	1	4	4	2	11	6	0	18	17	19	21	0	0	11	1	5	8	1	3	7	7	182
d__Bacteria	k__norank_d__Bacteria	p__Proteobacteria	c__Alphaproteobacteria	o__norank_c__Alphaproteobacteria	f__norank_c__Alphaproteobacteria	g__norank_c__Alphaproteobacteria	s__unclassified_g__norank_c__Alphaproteobacteria	OTU2115	1	1	4	1	4	0	1	0	1	2	1	0	2	6	3	3	2	0	1	3	0	0	3	4	0	3	1	47
d__Bacteria	k__norank_d__Bacteria	p__Proteobacteria	c__Alphaproteobacteria	o__norank_c__Alphaproteobacteria	f__norank_c__Alphaproteobacteria	g__norank_c__Alphaproteobacteria	s__uncultured_Stella_sp._g__norank_c__Alphaproteobacteria	OTU209	13	18	8	2	17	9	6	3	5	10	15	12	6	18	16	3	3	5	5	4	2	9	11	10	6	16	15	247
d__Bacteria	k__norank_d__Bacteria	p__Proteobacteria	c__Alphaproteobacteria	o__norank_c__Alphaproteobacteria	f__norank_c__Alphaproteobacteria	g__norank_c__Alphaproteobacteria	s__uncultured_Rhodospirillaceae_bacterium_g__norank_c__Alphaproteobacteria	OTU1345	18	62	8	6	42	8	8	7	9	7	27	36	11	35	32	8	5	5	7	34	2	16	32	19	39	23	8	514
d__Bacteria	k__norank_d__Bacteria	p__Patescibacteria	c__Berkelbacteria	o__norank_c__Berkelbacteria	f__norank_c__Berkelbacteria	g__norank_c__Berkelbacteria	s__uncultured_bacterium_g__norank_c__Berkelbacteria	OTU2649	1	1	6	1	0	1	2	0	0	0	1	0	2	1	0	0	0	2	0	2	4	9	0	0	13	0	0	46
d__Bacteria	k__norank_d__Bacteria	p__Elusimicrobia	c__Elusimicrobia	o__norank_c__Elusimicrobia	f__norank_c__Elusimicrobia	g__norank_c__Elusimicrobia	s__unclassified_g__norank_c__Elusimicrobia	OTU303	4	6	7	2	8	1	2	5	4	2	5	4	1	1	5	12	7	3	0	3	1	4	0	2	9	0	5	103
d__Bacteria	k__norank_d__Bacteria	p__Elusimicrobia	c__Elusimicrobia	o__norank_c__Elusimicrobia	f__norank_c__Elusimicrobia	g__norank_c__Elusimicrobia	s__uncultured_soil_bacterium_g__norank_c__Elusimicrobia	OTU3961	4	0	3	4	0	2	2	0	2	6	1	1	3	0	0	1	2	4	6	2	1	5	0	3	5	4	3	64
d__Bacteria	k__norank_d__Bacteria	p__Elusimicrobia	c__Elusimicrobia	o__norank_c__Elusimicrobia	f__norank_c__Elusimicrobia	g__norank_c__Elusimicrobia	s__unclassified_g__norank_c__Elusimicrobia	OTU3331	11	30	0	0	3	0	0	0	3	2	10	2	1	5	3	2	0	0	0	6	0	2	3	7	1	9	1	101
d__Bacteria	k__norank_d__Bacteria	p__Elusimicrobia	c__Elusimicrobia	o__norank_c__Elusimicrobia	f__norank_c__Elusimicrobia	g__norank_c__Elusimicrobia	s__unclassified_g__norank_c__Elusimicrobia	OTU3279	10	7	3	4	7	2	6	5	3	8	1	3	6	6	1	1	0	6	5	12	3	5	7	2	8	4	13	138
d__Bacteria	k__norank_d__Bacteria	p__Elusimicrobia	c__Elusimicrobia	o__norank_c__Elusimicrobia	f__norank_c__Elusimicrobia	g__norank_c__Elusimicrobia	s__unclassified_g__norank_c__Elusimicrobia	OTU369	6	5	4	0	2	1	0	0	2	0	3	1	1	7	1	0	1	0	0	1	1	4	1	3	16	1	3	64
d__Bacteria	k__norank_d__Bacteria	p__Elusimicrobia	c__Elusimicrobia	o__norank_c__Elusimicrobia	f__norank_c__Elusimicrobia	g__norank_c__Elusimicrobia	s__unclassified_g__norank_c__Elusimicrobia	OTU2854	3	0	0	0	0	1	0	0	0	2	2	2	0	2	5	1	0	2	0	2	1	4	3	1	3	1	0	35
d__Bacteria	k__norank_d__Bacteria	p__Elusimicrobia	c__Elusimicrobia	o__norank_c__Elusimicrobia	f__norank_c__Elusimicrobia	g__norank_c__Elusimicrobia	s__unclassified_g__norank_c__Elusimicrobia	OTU3380	11	9	4	3	2	4	2	7	5	5	8	1	4	8	2	4	8	11	5	9	2	14	1	4	18	7	5	163
d__Bacteria	k__norank_d__Bacteria	p__Elusimicrobia	c__Elusimicrobia	o__norank_c__Elusimicrobia	f__norank_c__Elusimicrobia	g__norank_c__Elusimicrobia	s__unclassified_g__norank_c__Elusimicrobia	OTU2962	14	8	16	0	5	4	3	6	4	8	8	5	3	12	3	10	4	1	0	6	1	8	9	8	14	4	8	172
d__Bacteria	k__norank_d__Bacteria	p__Elusimicrobia	c__Elusimicrobia	o__norank_c__Elusimicrobia	f__norank_c__Elusimicrobia	g__norank_c__Elusimicrobia	s__uncultured_actinobacterium_g__norank_c__Elusimicrobia	OTU1267	0	8	1	0	6	1	0	5	3	1	0	1	1	3	3	0	1	0	0	0	0	0	0	2	0	0	0	36
d__Bacteria	k__norank_d__Bacteria	p__Elusimicrobia	c__Elusimicrobia	o__norank_c__Elusimicrobia	f__norank_c__Elusimicrobia	g__norank_c__Elusimicrobia	s__uncultured_soil_bacterium_g__norank_c__Elusimicrobia	OTU3998	5	10	11	3	3	9	0	6	1	7	5	2	4	11	4	4	1	6	3	11	2	14	8	6	16	2	12	166
d__Bacteria	k__norank_d__Bacteria	p__Elusimicrobia	c__Elusimicrobia	o__norank_c__Elusimicrobia	f__norank_c__Elusimicrobia	g__norank_c__Elusimicrobia	s__uncultured_bacterium_g__norank_c__Elusimicrobia	OTU3428	13	8	8	2	1	2	0	2	5	6	3	1	4	11	7	4	2	3	2	3	2	9	1	9	12	5	5	130
d__Bacteria	k__norank_d__Bacteria	p__Elusimicrobia	c__Elusimicrobia	o__norank_c__Elusimicrobia	f__norank_c__Elusimicrobia	g__norank_c__Elusimicrobia	s__unclassified_g__norank_c__Elusimicrobia	OTU3990	0	1	0	0	1	2	6	3	2	3	2	1	10	8	0	0	0	13	3	1	4	4	5	3	3	2	10	87
d__Bacteria	k__norank_d__Bacteria	p__Elusimicrobia	c__Elusimicrobia	o__norank_c__Elusimicrobia	f__norank_c__Elusimicrobia	g__norank_c__Elusimicrobia	s__unclassified_g__norank_c__Elusimicrobia	OTU3429	2	19	1	0	0	1	0	0	1	1	6	0	0	5	0	0	0	0	0	2	1	3	2	2	3	1	6	56
d__Bacteria	k__norank_d__Bacteria	p__Elusimicrobia	c__Elusimicrobia	o__norank_c__Elusimicrobia	f__norank_c__Elusimicrobia	g__norank_c__Elusimicrobia	s__metagenome_g__norank_c__Elusimicrobia	OTU3473	3	9	1	1	1	1	1	2	3	4	3	3	0	9	2	0	0	2	4	1	0	3	1	5	1	4	2	66
d__Bacteria	k__norank_d__Bacteria	p__Proteobacteria	c__Gammaproteobacteria	o__norank_c__Gammaproteobacteria	f__norank_c__Gammaproteobacteria	g__norank_c__Gammaproteobacteria	s__metagenome_g__norank_c__Gammaproteobacteria	OTU3912	1	9	2	3	2	1	1	1	3	1	2	4	1	11	8	1	1	2	1	3	1	6	3	5	9	4	10	96
d__Bacteria	k__norank_d__Bacteria	p__Gemmatimonadetes	c__Gemmatimonadetes	o__norank_c__Gemmatimonadetes	f__norank_c__Gemmatimonadetes	g__norank_c__Gemmatimonadetes	s__unclassified_g__norank_c__Gemmatimonadetes	OTU616	6	5	2	1	3	0	0	1	1	0	2	2	0	5	2	8	5	0	0	3	0	3	0	2	5	1	1	58
d__Bacteria	k__norank_d__Bacteria	p__Gemmatimonadetes	c__Gemmatimonadetes	o__norank_c__Gemmatimonadetes	f__norank_c__Gemmatimonadetes	g__norank_c__Gemmatimonadetes	s__unclassified_g__norank_c__Gemmatimonadetes	OTU3014	17	29	4	0	9	1	0	2	2	0	22	6	2	37	3	5	1	2	0	16	0	5	1	8	12	4	1	189
d__Bacteria	k__norank_d__Bacteria	p__Gemmatimonadetes	c__Gemmatimonadetes	o__norank_c__Gemmatimonadetes	f__norank_c__Gemmatimonadetes	g__norank_c__Gemmatimonadetes	s__unclassified_g__norank_c__Gemmatimonadetes	OTU360	1	3	0	0	6	0	0	0	0	0	6	3	0	4	0	0	1	0	0	3	0	1	0	0	2	1	0	31
d__Bacteria	k__norank_d__Bacteria	p__Gemmatimonadetes	c__Gemmatimonadetes	o__norank_c__Gemmatimonadetes	f__norank_c__Gemmatimonadetes	g__norank_c__Gemmatimonadetes	s__uncultured_bacterium_g__norank_c__Gemmatimonadetes	OTU471	0	1	0	0	9	0	0	0	0	0	8	4	0	2	1	0	0	0	0	6	0	0	0	1	0	1	0	33
d__Bacteria	k__norank_d__Bacteria	p__Gemmatimonadetes	c__Gemmatimonadetes	o__norank_c__Gemmatimonadetes	f__norank_c__Gemmatimonadetes	g__norank_c__Gemmatimonadetes	s__unclassified_g__norank_c__Gemmatimonadetes	OTU2433	8	60	4	1	17	0	0	7	5	2	8	3	0	3	9	0	4	1	0	8	0	0	1	0	1	7	2	151
d__Bacteria	k__norank_d__Bacteria	p__Gemmatimonadetes	c__Gemmatimonadetes	o__norank_c__Gemmatimonadetes	f__norank_c__Gemmatimonadetes	g__norank_c__Gemmatimonadetes	s__unclassified_g__norank_c__Gemmatimonadetes	OTU2915	50	110	22	2	28	7	1	11	12	10	30	11	7	46	13	82	64	8	3	37	3	32	15	20	35	15	12	686
d__Bacteria	k__norank_d__Bacteria	p__Gemmatimonadetes	c__Gemmatimonadetes	o__norank_c__Gemmatimonadetes	f__norank_c__Gemmatimonadetes	g__norank_c__Gemmatimonadetes	s__uncultured_soil_bacterium_g__norank_c__Gemmatimonadetes	OTU2912	90	184	50	1	84	21	9	14	45	21	114	94	26	136	77	33	42	46	16	109	4	59	107	99	56	78	30	1645
d__Bacteria	k__norank_d__Bacteria	p__Gemmatimonadetes	c__Gemmatimonadetes	o__norank_c__Gemmatimonadetes	f__norank_c__Gemmatimonadetes	g__norank_c__Gemmatimonadetes	s__metagenome_g__norank_c__Gemmatimonadetes	OTU359	3	7	1	0	1	1	1	1	0	1	4	3	1	2	2	1	1	5	1	3	0	12	1	0	8	0	2	62
d__Bacteria	k__norank_d__Bacteria	p__Gemmatimonadetes	c__Gemmatimonadetes	o__norank_c__Gemmatimonadetes	f__norank_c__Gemmatimonadetes	g__norank_c__Gemmatimonadetes	s__unclassified_g__norank_c__Gemmatimonadetes	OTU3241	2	4	0	0	2	0	0	0	0	0	5	2	0	4	0	9	5	0	0	3	0	2	0	1	1	0	1	41
d__Bacteria	k__norank_d__Bacteria	p__Chloroflexi	c__Gitt-GS-136	o__norank_c__Gitt-GS-136	f__norank_c__Gitt-GS-136	g__norank_c__Gitt-GS-136	s__uncultured_bacterium_g__norank_c__Gitt-GS-136	OTU617	8	9	2	1	12	3	2	0	2	1	12	11	4	23	1	5	2	4	5	5	2	18	1	4	16	4	2	159
d__Bacteria	k__norank_d__Bacteria	p__Chloroflexi	c__Gitt-GS-136	o__norank_c__Gitt-GS-136	f__norank_c__Gitt-GS-136	g__norank_c__Gitt-GS-136	s__uncultured_bacterium_g__norank_c__Gitt-GS-136	OTU2924	35	30	12	9	50	27	6	6	8	9	79	79	24	56	17	23	8	40	16	68	6	40	47	26	57	28	20	826
d__Bacteria	k__norank_d__Bacteria	p__Chloroflexi	c__Gitt-GS-136	o__norank_c__Gitt-GS-136	f__norank_c__Gitt-GS-136	g__norank_c__Gitt-GS-136	s__unclassified_g__norank_c__Gitt-GS-136	OTU614	3	4	0	1	9	1	0	0	1	0	6	0	1	9	1	7	3	2	0	2	0	1	5	1	2	1	2	62
d__Bacteria	k__norank_d__Bacteria	p__Chloroflexi	c__Gitt-GS-136	o__norank_c__Gitt-GS-136	f__norank_c__Gitt-GS-136	g__norank_c__Gitt-GS-136	s__unclassified_g__norank_c__Gitt-GS-136	OTU3083	6	1	1	0	9	3	3	0	0	1	12	9	3	6	5	1	1	7	1	12	1	9	5	2	7	4	4	113
d__Bacteria	k__norank_d__Bacteria	p__Chloroflexi	c__Gitt-GS-136	o__norank_c__Gitt-GS-136	f__norank_c__Gitt-GS-136	g__norank_c__Gitt-GS-136	s__uncultured_bacterium_g__norank_c__Gitt-GS-136	OTU3955	13	11	5	1	5	4	2	0	0	2	18	6	9	9	3	6	1	11	1	14	2	3	7	8	7	3	11	162
d__Bacteria	k__norank_d__Bacteria	p__Chloroflexi	c__JG30-KF-CM66	o__norank_c__JG30-KF-CM66	f__norank_c__JG30-KF-CM66	g__norank_c__JG30-KF-CM66	s__uncultured_bacterium_g__norank_c__JG30-KF-CM66	OTU688	4	6	2	0	4	2	0	0	0	1	8	5	4	11	0	1	3	3	1	5	1	15	11	3	21	3	1	115
d__Bacteria	k__norank_d__Bacteria	p__Chloroflexi	c__JG30-KF-CM66	o__norank_c__JG30-KF-CM66	f__norank_c__JG30-KF-CM66	g__norank_c__JG30-KF-CM66	s__metagenome_g__norank_c__JG30-KF-CM66	OTU2762	1	0	1	0	0	0	1	0	0	0	5	2	1	1	2	0	0	2	1	0	0	10	2	1	9	0	2	41
d__Bacteria	k__norank_d__Bacteria	p__Chloroflexi	c__JG30-KF-CM66	o__norank_c__JG30-KF-CM66	f__norank_c__JG30-KF-CM66	g__norank_c__JG30-KF-CM66	s__uncultured_Armatimonadetes_bacterium_g__norank_c__JG30-KF-CM66	OTU3072	9	10	2	0	8	1	0	0	1	1	25	16	1	18	5	4	2	6	2	20	0	7	14	4	14	4	2	176
d__Bacteria	k__norank_d__Bacteria	p__Chloroflexi	c__KD4-96	o__norank_c__KD4-96	f__norank_c__KD4-96	g__norank_c__KD4-96	s__unclassified_g__norank_c__KD4-96	OTU3038	21	12	10	8	12	8	5	2	6	5	20	23	4	35	12	20	10	9	3	23	2	22	22	12	12	21	9	348
d__Bacteria	k__norank_d__Bacteria	p__Chloroflexi	c__KD4-96	o__norank_c__KD4-96	f__norank_c__KD4-96	g__norank_c__KD4-96	s__unclassified_g__norank_c__KD4-96	OTU3617	6	0	2	3	0	0	0	1	0	2	2	5	5	3	0	3	1	11	1	12	2	1	2	2	9	2	0	75
d__Bacteria	k__norank_d__Bacteria	p__Chloroflexi	c__KD4-96	o__norank_c__KD4-96	f__norank_c__KD4-96	g__norank_c__KD4-96	s__uncultured_Chloroflexi_bacterium_g__norank_c__KD4-96	OTU489	7	3	0	0	3	0	1	0	0	1	14	10	4	9	2	0	0	2	1	10	1	3	6	2	9	1	0	89
d__Bacteria	k__norank_d__Bacteria	p__Chloroflexi	c__KD4-96	o__norank_c__KD4-96	f__norank_c__KD4-96	g__norank_c__KD4-96	s__uncultured_Anaerolineaceae_bacterium_g__norank_c__KD4-96	OTU791	5	2	3	0	1	3	1	2	1	2	2	8	2	5	2	4	2	3	2	4	1	7	1	1	3	2	2	71
d__Bacteria	k__norank_d__Bacteria	p__Chloroflexi	c__KD4-96	o__norank_c__KD4-96	f__norank_c__KD4-96	g__norank_c__KD4-96	s__uncultured_Chloroflexi_bacterium_g__norank_c__KD4-96	OTU3209	178	130	104	95	103	56	43	44	75	68	253	175	77	277	88	107	48	84	52	232	27	193	260	77	205	146	106	3303
d__Bacteria	k__norank_d__Bacteria	p__Chloroflexi	c__KD4-96	o__norank_c__KD4-96	f__norank_c__KD4-96	g__norank_c__KD4-96	s__unclassified_g__norank_c__KD4-96	OTU2585	102	106	57	44	71	52	50	26	27	55	172	122	64	176	57	67	41	81	64	118	19	174	135	46	160	65	73	2224
d__Bacteria	k__norank_d__Bacteria	p__Chloroflexi	c__KD4-96	o__norank_c__KD4-96	f__norank_c__KD4-96	g__norank_c__KD4-96	s__uncultured_bacterium_g__norank_c__KD4-96	OTU3045	3	3	4	2	9	3	1	0	1	2	9	8	3	7	6	5	3	2	3	3	2	8	7	4	16	4	5	123
d__Bacteria	k__norank_d__Bacteria	p__Chloroflexi	c__KD4-96	o__norank_c__KD4-96	f__norank_c__KD4-96	g__norank_c__KD4-96	s__unclassified_g__norank_c__KD4-96	OTU2375	2	1	3	2	4	2	0	0	3	3	4	6	1	6	3	19	9	1	3	7	0	10	3	1	8	2	5	108
d__Bacteria	k__norank_d__Bacteria	p__Latescibacteria	c__Latescibacteria	o__norank_c__Latescibacteria	f__norank_c__Latescibacteria	g__norank_c__Latescibacteria	s__uncultured_organism_g__norank_c__Latescibacteria	OTU4428	5	8	7	2	31	1	0	32	48	0	12	5	0	7	11	2	11	0	0	10	0	0	8	0	1	14	1	216
d__Bacteria	k__norank_d__Bacteria	p__Latescibacteria	c__Latescibacteria	o__norank_c__Latescibacteria	f__norank_c__Latescibacteria	g__norank_c__Latescibacteria	s__uncultured_prokaryote_g__norank_c__Latescibacteria	OTU3016	16	11	2	2	8	12	1	8	10	6	8	9	6	20	5	46	49	1	3	7	5	6	11	1	6	3	7	269
d__Bacteria	k__norank_d__Bacteria	p__Latescibacteria	c__Latescibacteria	o__norank_c__Latescibacteria	f__norank_c__Latescibacteria	g__norank_c__Latescibacteria	s__uncultured_bacterium_g__norank_c__Latescibacteria	OTU2826	13	10	2	1	2	1	1	2	3	8	5	1	5	23	2	15	32	2	3	2	1	21	0	5	8	4	6	178
d__Bacteria	k__norank_d__Bacteria	p__Latescibacteria	c__Latescibacteria	o__norank_c__Latescibacteria	f__norank_c__Latescibacteria	g__norank_c__Latescibacteria	s__uncultured_Acidobacterium_sp._g__norank_c__Latescibacteria	OTU3936	27	8	4	7	6	10	6	7	7	6	2	1	5	11	7	286	108	0	7	9	3	16	6	3	12	1	64	629
d__Bacteria	k__norank_d__Bacteria	p__Latescibacteria	c__Latescibacteria	o__norank_c__Latescibacteria	f__norank_c__Latescibacteria	g__norank_c__Latescibacteria	s__uncultured_Latescibacteria_bacterium_g__norank	OTU4433	3	0	0	0	0	0	0	0	0	0	0	2	0	1	2	9	5	0	0	0	0	0	0	0	1	0	2	25
d__Bacteria	k__norank_d__Bacteria	p__Latescibacteria	c__Latescibacteria	o__norank_c__Latescibacteria	f__norank_c__Latescibacteria	g__norank_c__Latescibacteria	s__unclassified_g__norank_c__Latescibacteria	OTU3908	3	1	18	10	0	1	41	0	1	10	0	1	22	1	2	0	0	29	19	0	18	85	0	2	48	0	8	320
d__Bacteria	k__norank_d__Bacteria	p__Latescibacteria	c__Latescibacteria	o__norank_c__Latescibacteria	f__norank_c__Latescibacteria	g__norank_c__Latescibacteria	s__uncultured_bacterium_g__norank_c__Latescibacteria	OTU2976	4	6	7	1	9	2	1	6	1	4	6	7	3	11	2	4	1	0	1	5	1	2	6	2	2	5	5	104
d__Bacteria	k__norank_d__Bacteria	p__Latescibacteria	c__Latescibacteria	o__norank_c__Latescibacteria	f__norank_c__Latescibacteria	g__norank_c__Latescibacteria	s__uncultured_bacterium_g__norank_c__Latescibacteria	OTU3084	98	281	8	4	231	11	0	16	118	4	193	64	1	269	52	2	59	2	2	161	1	14	128	26	7	74	9	1835
d__Bacteria	k__norank_d__Bacteria	p__Latescibacteria	c__Latescibacteria	o__norank_c__Latescibacteria	f__norank_c__Latescibacteria	g__norank_c__Latescibacteria	s__unclassified_g__norank_c__Latescibacteria	OTU4617	1	0	3	1	1	1	13	1	1	12	0	0	3	2	0	0	3	8	2	0	7	13	0	0	8	3	5	88
d__Bacteria	k__norank_d__Bacteria	p__Latescibacteria	c__Latescibacteria	o__norank_c__Latescibacteria	f__norank_c__Latescibacteria	g__norank_c__Latescibacteria	s__uncultured_Fibrobacteres_bacterium_g__norank	OTU4058	2	0	3	1	0	1	1	2	1	0	0	0	4	1	2	17	10	0	0	1	0	4	1	4	2	2	5	64
d__Bacteria	k__norank_d__Bacteria	p__Latescibacteria	c__Latescibacteria	o__norank_c__Latescibacteria	f__norank_c__Latescibacteria	g__norank_c__Latescibacteria	s__uncultured_bacterium_g__norank_c__Latescibacteria	OTU3767	0	0	0	0	2	0	0	0	4	0	0	0	0	3	4	0	9	0	0	1	0	0	2	0	0	3	0	28
d__Bacteria	k__norank_d__Bacteria	p__Latescibacteria	c__Latescibacteria	o__norank_c__Latescibacteria	f__norank_c__Latescibacteria	g__norank_c__Latescibacteria	s__uncultured_bacterium_g__norank_c__Latescibacteria	OTU2944	20	15	3	4	14	16	4	4	11	6	24	8	10	71	9	15	8	11	8	24	5	39	14	6	33	10	11	403
d__Bacteria	k__norank_d__Bacteria	p__Latescibacteria	c__Latescibacteria	o__norank_c__Latescibacteria	f__norank_c__Latescibacteria	g__norank_c__Latescibacteria	s__unclassified_g__norank_c__Latescibacteria	OTU2776	6	3	7	2	3	9	12	0	1	5	10	14	5	19	13	4	1	17	13	4	8	42	3	3	47	5	6	262
d__Bacteria	k__norank_d__Bacteria	p__Latescibacteria	c__Latescibacteria	o__norank_c__Latescibacteria	f__norank_c__Latescibacteria	g__norank_c__Latescibacteria	s__uncultured_bacterium_g__norank_c__Latescibacteria	OTU2764	23	17	43	5	6	7	29	0	0	8	14	8	19	19	7	5	3	67	22	6	21	117	7	15	90	5	11	574
d__Bacteria	k__norank_d__Bacteria	p__Latescibacteria	c__Latescibacteria	o__norank_c__Latescibacteria	f__norank_c__Latescibacteria	g__norank_c__Latescibacteria	s__uncultured_Latescibacteria_bacterium_g__norank	OTU4418	3	15	0	0	7	0	0	1	4	0	2	3	0	14	2	6	16	0	0	3	0	2	0	1	0	2	0	81
d__Bacteria	k__norank_d__Bacteria	p__Latescibacteria	c__Latescibacteria	o__norank_c__Latescibacteria	f__norank_c__Latescibacteria	g__norank_c__Latescibacteria	s__uncultured_Acidobacterium_sp._g__norank_c__Latescibacteria	OTU4004	5	1	1	3	0	7	3	1	2	2	0	1	2	2	3	41	15	2	1	0	3	7	1	1	2	0	28	134
d__Bacteria	k__norank_d__Bacteria	p__Latescibacteria	c__Latescibacteria	o__norank_c__Latescibacteria	f__norank_c__Latescibacteria	g__norank_c__Latescibacteria	s__uncultured_soil_bacterium_g__norank_c__Latescibacteria	OTU3965	13	7	9	6	20	4	2	9	16	8	3	2	6	7	13	16	29	1	15	3	2	21	6	7	12	6	27	270
d__Bacteria	k__norank_d__Bacteria	p__Latescibacteria	c__Latescibacteria	o__norank_c__Latescibacteria	f__norank_c__Latescibacteria	g__norank_c__Latescibacteria	s__uncultured_Pelobacter_sp._g__norank	OTU2761	15	12	4	3	5	3	5	6	22	6	8	10	4	13	16	7	25	2	6	8	3	14	10	7	25	9	9	257
d__Bacteria	k__norank_d__Bacteria	p__Latescibacteria	c__Latescibacteria	o__norank_c__Latescibacteria	f__norank_c__Latescibacteria	g__norank_c__Latescibacteria	s__unclassified_g__norank_c__Latescibacteria	OTU3445	1	8	1	0	4	0	0	2	2	2	2	4	0	3	4	1	5	1	1	3	1	2	1	3	1	1	1	54
d__Bacteria	k__norank_d__Bacteria	p__Latescibacteria	c__Latescibacteria	o__norank_c__Latescibacteria	f__norank_c__Latescibacteria	g__norank_c__Latescibacteria	s__unclassified_g__norank_c__Latescibacteria	OTU3854	7	13	2	3	12	1	2	3	9	5	13	2	1	12	8	1	3	0	2	12	0	5	5	0	6	9	4	140
d__Bacteria	k__norank_d__Bacteria	p__Latescibacteria	c__Latescibacteria	o__norank_c__Latescibacteria	f__norank_c__Latescibacteria	g__norank_c__Latescibacteria	s__unclassified_g__norank_c__Latescibacteria	OTU4076	2	3	1	0	6	0	0	1	3	2	4	1	1	4	1	11	1	0	0	3	0	1	2	0	0	0	1	48
d__Bacteria	k__norank_d__Bacteria	p__Latescibacteria	c__Latescibacteria	o__norank_c__Latescibacteria	f__norank_c__Latescibacteria	g__norank_c__Latescibacteria	s__unclassified_g__norank_c__Latescibacteria	OTU3351	21	2	4	4	3	1	0	3	4	0	3	1	2	5	1	78	98	1	0	0	0	1	6	1	0	3	6	248
d__Bacteria	k__norank_d__Bacteria	p__Latescibacteria	c__Latescibacteria	o__norank_c__Latescibacteria	f__norank_c__Latescibacteria	g__norank_c__Latescibacteria	s__uncultured_bacterium_g__norank_c__Latescibacteria	OTU3221	6	15	2	2	12	3	0	18	15	1	16	8	1	10	19	2	6	0	0	7	0	9	7	2	4	2	1	168
d__Bacteria	k__norank_d__Bacteria	p__Latescibacteria	c__Latescibacteria	o__norank_c__Latescibacteria	f__norank_c__Latescibacteria	g__norank_c__Latescibacteria	s__unclassified_g__norank_c__Latescibacteria	OTU4063	6	10	5	2	13	7	1	5	14	4	2	5	1	15	5	35	32	3	0	8	1	10	8	1	3	3	7	206
d__Bacteria	k__norank_d__Bacteria	p__Latescibacteria	c__Latescibacteria	o__norank_c__Latescibacteria	f__norank_c__Latescibacteria	g__norank_c__Latescibacteria	s__uncultured_soil_bacterium_PBS-III-30	OTU3082	6	17	1	1	12	3	1	6	8	1	18	11	2	16	7	5	6	1	0	10	1	4	10	1	3	5	0	156
d__Bacteria	k__norank_d__Bacteria	p__Latescibacteria	c__Latescibacteria	o__norank_c__Latescibacteria	f__norank_c__Latescibacteria	g__norank_c__Latescibacteria	s__unclassified_g__norank_c__Latescibacteria	OTU3876	15	6	1	1	4	0	0	4	2	1	4	4	1	7	8	76	96	0	1	7	0	2	1	1	5	3	22	272
d__Bacteria	k__norank_d__Bacteria	p__Latescibacteria	c__Latescibacteria	o__norank_c__Latescibacteria	f__norank_c__Latescibacteria	g__norank_c__Latescibacteria	s__uncultured_prokaryote_g__norank_c__Latescibacteria	OTU1353	0	3	0	0	7	0	0	3	4	1	3	1	1	2	8	3	3	0	0	1	0	2	4	0	1	1	1	49
d__Bacteria	k__norank_d__Bacteria	p__Latescibacteria	c__Latescibacteria	o__norank_c__Latescibacteria	f__norank_c__Latescibacteria	g__norank_c__Latescibacteria	s__uncultured_Acidobacterium_sp._g__norank_c__Latescibacteria	OTU4259	7	3	6	2	2	4	1	7	2	2	2	3	1	0	3	32	13	2	2	2	1	4	2	1	2	0	7	113
d__Bacteria	k__norank_d__Bacteria	p__Latescibacteria	c__Latescibacteria	o__norank_c__Latescibacteria	f__norank_c__Latescibacteria	g__norank_c__Latescibacteria	s__unclassified_g__norank_c__Latescibacteria	OTU3875	69	75	71	20	6	6	34	21	16	59	38	13	42	101	17	62	24	74	21	85	24	51	57	37	348	51	49	1471
d__Bacteria	k__norank_d__Bacteria	p__Latescibacteria	c__Latescibacteria	o__norank_c__Latescibacteria	f__norank_c__Latescibacteria	g__norank_c__Latescibacteria	s__unclassified_g__norank_c__Latescibacteria	OTU3993	4	15	1	0	5	2	0	2	2	1	7	3	0	8	2	7	2	0	0	5	0	5	3	4	1	6	2	87
d__Bacteria	k__norank_d__Bacteria	p__Latescibacteria	c__Latescibacteria	o__norank_c__Latescibacteria	f__norank_c__Latescibacteria	g__norank_c__Latescibacteria	s__metagenome_g__norank_c__Latescibacteria	OTU2984	22	38	15	4	30	16	11	3	11	8	47	34	11	74	20	7	14	22	14	24	7	83	30	13	58	9	35	660
d__Bacteria	k__norank_d__Bacteria	p__Latescibacteria	c__Latescibacteria	o__norank_c__Latescibacteria	f__norank_c__Latescibacteria	g__norank_c__Latescibacteria	s__unclassified_g__norank_c__Latescibacteria	OTU1957	13	2	2	0	0	0	0	0	0	0	1	2	0	3	0	5	31	0	1	0	1	3	0	0	4	0	0	68
d__Bacteria	k__norank_d__Bacteria	p__Patescibacteria	c__Microgenomatia	o__norank_c__Microgenomatia	f__norank_c__Microgenomatia	g__norank_c__Microgenomatia	s__unclassified_g__norank_c__Microgenomatia	OTU3487	0	0	0	0	7	0	2	0	0	0	7	1	0	8	0	2	0	0	1	2	0	0	2	2	6	4	0	44
d__Bacteria	k__norank_d__Bacteria	p__Chloroflexi	c__OLB14	o__norank_c__OLB14	f__norank_c__OLB14	g__norank_c__OLB14	s__uncultured_bacterium_g__norank_c__OLB14	OTU2834	0	2	0	1	5	0	1	0	0	0	9	6	1	6	2	4	0	4	1	4	0	14	5	2	15	0	0	82
d__Bacteria	k__norank_d__Bacteria	p__Chloroflexi	c__OLB14	o__norank_c__OLB14	f__norank_c__OLB14	g__norank_c__OLB14	s__unclassified_g__norank_c__OLB14	OTU2957	2	1	0	0	1	0	0	0	0	0	5	8	0	9	0	1	1	6	0	5	1	21	4	0	15	0	0	80
d__Bacteria	k__norank_d__Bacteria	p__Planctomycetes	c__OM190	o__norank_c__OM190	f__norank_c__OM190	g__norank_c__OM190	s__uncultured_microorganism_g__norank_c__OM190	OTU1164	0	1	0	0	1	0	0	1	1	0	5	4	1	0	9	1	0	0	0	0	0	0	0	1	5	1	1	32
d__Bacteria	k__norank_d__Bacteria	p__Planctomycetes	c__OM190	o__norank_c__OM190	f__norank_c__OM190	g__norank_c__OM190	s__unclassified_g__norank_c__OM190	OTU1317	22	38	4	0	40	4	1	3	6	2	32	11	9	18	6	11	5	2	0	21	1	11	12	11	28	15	3	316
d__Bacteria	k__norank_d__Bacteria	p__Planctomycetes	c__OM190	o__norank_c__OM190	f__norank_c__OM190	g__norank_c__OM190	s__uncultured_bacterium_g__norank_c__OM190	OTU1320	10	5	0	0	3	2	2	0	1	1	5	0	2	11	1	1	0	9	1	5	1	14	3	2	20	2	1	102
d__Bacteria	k__norank_d__Bacteria	p__Planctomycetes	c__OM190	o__norank_c__OM190	f__norank_c__OM190	g__norank_c__OM190	s__uncultured_Planctomyces_sp._g__norank	OTU3833	7	8	0	1	12	0	0	0	2	1	4	4	0	6	5	0	0	0	0	4	0	0	4	0	0	2	0	60
d__Bacteria	k__norank_d__Bacteria	p__Planctomycetes	c__OM190	o__norank_c__OM190	f__norank_c__OM190	g__norank_c__OM190	s__uncultured_bacterium_g__norank_c__OM190	OTU3790	7	21	2	0	15	6	0	2	4	2	8	4	2	8	14	9	2	0	3	2	1	14	1	2	20	3	4	156
d__Bacteria	k__norank_d__Bacteria	p__Planctomycetes	c__OM190	o__norank_c__OM190	f__norank_c__OM190	g__norank_c__OM190	s__unclassified_g__norank_c__OM190	OTU1577	18	21	11	3	4	4	2	6	6	13	11	7	2	16	11	3	4	4	5	18	0	22	4	12	23	13	5	248
d__Bacteria	k__norank_d__Bacteria	p__Planctomycetes	c__OM190	o__norank_c__OM190	f__norank_c__OM190	g__norank_c__OM190	s__uncultured_bacterium_g__norank_c__OM190	OTU4072	2	2	0	1	3	0	0	1	1	1	2	0	1	2	1	16	10	0	0	2	0	4	1	1	3	0	2	56
d__Bacteria	k__norank_d__Bacteria	p__Planctomycetes	c__OM190	o__norank_c__OM190	f__norank_c__OM190	g__norank_c__OM190	s__uncultured_bacterium_g__norank_c__OM190	OTU2981	1	1	0	0	5	0	0	0	1	0	6	6	0	4	1	0	0	0	0	2	0	0	2	0	1	0	2	32
d__Bacteria	k__norank_d__Bacteria	p__Planctomycetes	c__OM190	o__norank_c__OM190	f__norank_c__OM190	g__norank_c__OM190	s__uncultured_bacterium_g__norank_c__OM190	OTU3845	20	20	11	2	1	5	5	1	1	5	3	2	9	7	1	5	1	1	2	6	1	15	4	4	17	4	4	157
d__Bacteria	k__norank_d__Bacteria	p__Planctomycetes	c__OM190	o__norank_c__OM190	f__norank_c__OM190	g__norank_c__OM190	s__uncultured_soil_bacterium_g__norank_c__OM190	OTU3827	1	0	0	0	0	0	0	0	0	0	7	2	1	6	3	0	0	0	2	0	0	1	1	0	6	0	0	30
d__Bacteria	k__norank_d__Bacteria	p__Planctomycetes	c__OM190	o__norank_c__OM190	f__norank_c__OM190	g__norank_c__OM190	s__uncultured_bacterium_g__norank_c__OM190	OTU1141	25	63	7	1	27	6	1	12	8	10	22	18	4	23	16	4	3	1	4	22	1	14	15	19	11	15	3	355
d__Bacteria	k__norank_d__Bacteria	p__Planctomycetes	c__OM190	o__norank_c__OM190	f__norank_c__OM190	g__norank_c__OM190	s__uncultured_bacterium_g__norank_c__OM190	OTU1802	1	10	0	0	3	1	0	1	1	1	9	5	1	11	6	0	1	1	0	8	0	1	6	1	3	0	0	71
d__Bacteria	k__norank_d__Bacteria	p__Planctomycetes	c__OM190	o__norank_c__OM190	f__norank_c__OM190	g__norank_c__OM190	s__uncultured_bacterium_g__norank_c__OM190	OTU3632	2	1	0	0	0	0	0	0	0	0	5	2	0	4	0	0	0	0	0	1	0	6	4	2	6	1	1	35
d__Bacteria	k__norank_d__Bacteria	p__Planctomycetes	c__OM190	o__norank_c__OM190	f__norank_c__OM190	g__norank_c__OM190	s__unclassified_g__norank_c__OM190	OTU3664	29	61	13	0	21	7	0	3	4	13	24	19	14	28	10	5	4	8	4	14	5	38	18	17	36	15	12	422
d__Bacteria	k__norank_d__Bacteria	p__Planctomycetes	c__OM190	o__norank_c__OM190	f__norank_c__OM190	g__norank_c__OM190	s__unclassified_g__norank_c__OM190	OTU3663	4	4	0	1	0	0	0	0	3	0	3	1	1	3	1	2	0	2	1	0	1	13	1	4	11	2	1	59
d__Bacteria	k__norank_d__Bacteria	p__Planctomycetes	c__OM190	o__norank_c__OM190	f__norank_c__OM190	g__norank_c__OM190	s__uncultured_bacterium_g__norank_c__OM190	OTU3502	23	20	29	6	3	0	0	1	0	3	3	4	8	3	6	0	1	3	1	16	6	1	0	17	4	4	9	171
d__Bacteria	k__norank_d__Bacteria	p__Chloroflexi	c__P2-11E	o__norank_c__P2-11E	f__norank_c__P2-11E	g__norank_c__P2-11E	s__uncultured_bacterium_g__norank_c__P2-11E	OTU3058	3	10	4	0	5	2	0	0	0	0	6	6	0	13	0	3	1	6	2	9	0	23	5	0	28	0	1	127
d__Bacteria	k__norank_d__Bacteria	p__Chloroflexi	c__P2-11E	o__norank_c__P2-11E	f__norank_c__P2-11E	g__norank_c__P2-11E	s__uncultured_bacterium_g__norank_c__P2-11E	OTU2539	1	3	0	0	2	0	0	0	0	0	1	5	1	1	0	27	19	0	0	2	0	2	1	0	3	1	0	69
d__Bacteria	k__norank_d__Bacteria	p__Nitrospinae	c__P9X2b3D02	o__norank_c__P9X2b3D02	f__norank_c__P9X2b3D02	g__norank_c__P9X2b3D02	s__uncultured_prokaryote_g__norank_c__P9X2b3D02	OTU3294	1	4	0	0	3	0	0	0	2	0	0	1	0	6	5	8	6	1	0	1	0	1	2	2	0	1	1	45
d__Bacteria	k__norank_d__Bacteria	p__Planctomycetes	c__Pla4_lineage	o__norank_c__Pla4_lineage	f__norank_c__Pla4_lineage	g__norank_c__Pla4_lineage	s__unclassified_g__norank_c__Pla4_lineage	OTU1963	5	13	1	0	10	0	0	1	1	1	7	2	0	2	4	3	0	0	0	3	0	2	0	0	3	1	3	62
d__Bacteria	k__norank_d__Bacteria	p__Planctomycetes	c__Pla4_lineage	o__norank_c__Pla4_lineage	f__norank_c__Pla4_lineage	g__norank_c__Pla4_lineage	s__unclassified_g__norank_c__Pla4_lineage	OTU1316	12	17	2	2	8	1	0	1	1	1	1	1	0	6	1	3	1	1	0	5	1	9	2	4	3	0	0	83
d__Bacteria	k__norank_d__Bacteria	p__Cyanobacteria	c__Sericytochromatia	o__norank_c__Sericytochromatia	f__norank_c__Sericytochromatia	g__norank_c__Sericytochromatia	s__CyanobacteriaMelainabacteria_group_bacterium_S15B-MN24_CBMW_12	OTU3205	4	2	1	1	1	5	3	4	3	0	7	0	2	3	1	0	0	1	1	1	1	0	3	6	5	8	3	66
d__Bacteria	k__norank_d__Bacteria	p__Cyanobacteria	c__Sericytochromatia	o__norank_c__Sericytochromatia	f__norank_c__Sericytochromatia	g__norank_c__Sericytochromatia	s__uncultured_bacterium_g__norank_c__Sericytochromatia	OTU3247	1	1	2	1	5	2	1	0	2	2	4	3	1	2	1	3	1	2	1	0	0	2	0	4	3	1	1	46
d__Bacteria	k__norank_d__Bacteria	p__Cyanobacteria	c__Sericytochromatia	o__norank_c__Sericytochromatia	f__norank_c__Sericytochromatia	g__norank_c__Sericytochromatia	s__uncultured_soil_bacterium_g__norank_c__Sericytochromatia	OTU1363	1	0	1	0	3	5	3	1	0	5	0	0	0	0	0	0	0	0	2	0	0	0	1	0	1	0	0	23
d__Bacteria	k__norank_d__Bacteria	p__Acidobacteria	c__Subgroup_11	o__norank_c__Subgroup_11	f__norank_c__Subgroup_11	g__norank_c__Subgroup_11	s__unclassified_g__norank_c__Subgroup_11	OTU163	4	0	1	0	0	0	0	3	1	0	1	1	0	0	2	33	17	1	0	3	0	2	0	3	3	2	4	81
d__Bacteria	k__norank_d__Bacteria	p__Acidobacteria	c__Subgroup_11	o__norank_c__Subgroup_11	f__norank_c__Subgroup_11	g__norank_c__Subgroup_11	s__unclassified_g__norank_c__Subgroup_11	OTU705	17	12	9	0	6	6	2	5	6	2	6	2	3	10	14	31	36	5	5	3	1	13	8	5	10	2	9	228
d__Bacteria	k__norank_d__Bacteria	p__Acidobacteria	c__Subgroup_15	o__norank_c__Subgroup_15	f__norank_c__Subgroup_15	g__norank_c__Subgroup_15	s__uncultured_bacterium_g__norank_c__Subgroup_15	OTU3848	1	4	0	1	5	1	0	5	4	1	3	0	1	11	5	10	15	0	0	4	2	3	2	0	0	2	4	84
d__Bacteria	k__norank_d__Bacteria	p__Acidobacteria	c__Subgroup_15	o__norank_c__Subgroup_15	f__norank_c__Subgroup_15	g__norank_c__Subgroup_15	s__uncultured_bacterium_g__norank_c__Subgroup_15	OTU3167	23	30	22	3	16	8	13	3	11	7	15	6	10	39	13	13	39	7	5	29	6	34	14	10	53	11	16	456
d__Bacteria	k__norank_d__Bacteria	p__Acidobacteria	c__Subgroup_17	o__norank_c__Subgroup_17	f__norank_c__Subgroup_17	g__norank_c__Subgroup_17	s__uncultured_Acidobacteriales_bacterium_g__norank_c__Subgroup_17	OTU626	3	2	1	1	3	0	0	0	1	1	2	6	0	4	0	11	11	1	0	0	0	11	1	3	2	1	2	67
d__Bacteria	k__norank_d__Bacteria	p__Acidobacteria	c__Subgroup_17	o__norank_c__Subgroup_17	f__norank_c__Subgroup_17	g__norank_c__Subgroup_17	s__uncultured_Acidobacterium_sp._g__norank_c__Subgroup_17	OTU2385	3	7	0	0	2	0	0	1	2	0	6	0	1	7	0	0	2	1	0	3	0	0	3	0	0	2	0	40
d__Bacteria	k__norank_d__Bacteria	p__Acidobacteria	c__Subgroup_17	o__norank_c__Subgroup_17	f__norank_c__Subgroup_17	g__norank_c__Subgroup_17	s__uncultured_Acidobacteria_bacterium_g__norank_c__Subgroup_17	OTU1914	3	7	1	0	8	1	0	0	1	0	7	5	2	9	1	28	21	2	1	5	0	5	4	0	6	0	2	119
d__Bacteria	k__norank_d__Bacteria	p__Acidobacteria	c__Subgroup_17	o__norank_c__Subgroup_17	f__norank_c__Subgroup_17	g__norank_c__Subgroup_17	s__uncultured_Acidobacteria_bacterium_g__norank_c__Subgroup_17	OTU3753	8	17	3	1	10	6	0	4	3	1	4	4	2	5	2	7	8	6	1	5	0	10	5	4	2	4	4	126
d__Bacteria	k__norank_d__Bacteria	p__Acidobacteria	c__Subgroup_17	o__norank_c__Subgroup_17	f__norank_c__Subgroup_17	g__norank_c__Subgroup_17	s__unclassified_g__norank_c__Subgroup_17	OTU2679	7	2	3	0	20	4	0	0	2	0	5	5	1	6	3	105	149	1	0	4	1	6	3	1	2	1	4	335
d__Bacteria	k__norank_d__Bacteria	p__Acidobacteria	c__Subgroup_17	o__norank_c__Subgroup_17	f__norank_c__Subgroup_17	g__norank_c__Subgroup_17	s__uncultured_Acidobacteria_bacterium_g__norank_c__Subgroup_17	OTU1769	4	1	1	0	0	3	0	1	2	0	0	0	0	1	0	4	2	2	0	0	0	3	0	4	1	0	0	29
d__Bacteria	k__norank_d__Bacteria	p__Acidobacteria	c__Subgroup_17	o__norank_c__Subgroup_17	f__norank_c__Subgroup_17	g__norank_c__Subgroup_17	s__unclassified_g__norank_c__Subgroup_17	OTU3192	6	5	0	0	4	0	0	1	1	1	1	1	0	4	2	5	5	0	0	2	0	2	2	1	0	1	0	44
d__Bacteria	k__norank_d__Bacteria	p__Acidobacteria	c__Subgroup_17	o__norank_c__Subgroup_17	f__norank_c__Subgroup_17	g__norank_c__Subgroup_17	s__unclassified_g__norank_c__Subgroup_17	OTU3922	8	20	2	2	15	9	2	6	8	5	13	7	4	8	10	6	11	1	7	5	1	25	9	7	24	1	5	221
d__Bacteria	k__norank_d__Bacteria	p__Acidobacteria	c__Subgroup_17	o__norank_c__Subgroup_17	f__norank_c__Subgroup_17	g__norank_c__Subgroup_17	s__unclassified_g__norank_c__Subgroup_17	OTU720	1	1	0	0	17	0	0	0	1	0	5	4	0	6	1	31	36	1	0	2	0	9	3	2	1	0	0	121
d__Bacteria	k__norank_d__Bacteria	p__Acidobacteria	c__Subgroup_17	o__norank_c__Subgroup_17	f__norank_c__Subgroup_17	g__norank_c__Subgroup_17	s__unclassified_g__norank_c__Subgroup_17	OTU2845	1	3	1	0	1	0	1	1	1	0	3	0	0	0	1	12	19	2	1	0	1	12	0	0	10	0	0	70
d__Bacteria	k__norank_d__Bacteria	p__Acidobacteria	c__Subgroup_17	o__norank_c__Subgroup_17	f__norank_c__Subgroup_17	g__norank_c__Subgroup_17	s__uncultured_Acidobacteria_bacterium_g__norank_c__Subgroup_17	OTU4463	1	2	0	1	0	1	0	0	0	0	1	4	0	0	1	5	7	1	0	0	0	10	2	1	0	0	2	39
d__Bacteria	k__norank_d__Bacteria	p__Acidobacteria	c__Subgroup_17	o__norank_c__Subgroup_17	f__norank_c__Subgroup_17	g__norank_c__Subgroup_17	s__metagenome_g__norank_c__Subgroup_17	OTU3870	5	4	0	0	2	6	4	1	0	1	2	0	1	12	1	3	0	4	3	6	2	18	2	1	11	1	2	92
d__Bacteria	k__norank_d__Bacteria	p__Acidobacteria	c__Subgroup_17	o__norank_c__Subgroup_17	f__norank_c__Subgroup_17	g__norank_c__Subgroup_17	s__unclassified_g__norank_c__Subgroup_17	OTU2779	0	0	0	0	0	0	0	0	1	0	2	0	0	0	0	0	0	4	1	0	1	8	0	1	6	0	0	24
d__Bacteria	k__norank_d__Bacteria	p__Acidobacteria	c__Subgroup_18	o__norank_c__Subgroup_18	f__norank_c__Subgroup_18	g__norank_c__Subgroup_18	s__uncultured_bacterium_g__norank_c__Subgroup_18	OTU2687	3	2	1	0	5	3	1	1	1	0	6	4	1	10	4	5	7	1	1	3	0	4	2	0	2	1	5	73
d__Bacteria	k__norank_d__Bacteria	p__Acidobacteria	c__Subgroup_22	o__norank_c__Subgroup_22	f__norank_c__Subgroup_22	g__norank_c__Subgroup_22	s__unclassified_g__norank_c__Subgroup_22	OTU3975	41	7	23	2	9	1	0	5	16	5	3	5	0	21	9	76	147	1	0	2	0	2	7	3	1	8	24	418
d__Bacteria	k__norank_d__Bacteria	p__Acidobacteria	c__Subgroup_22	o__norank_c__Subgroup_22	f__norank_c__Subgroup_22	g__norank_c__Subgroup_22	s__unclassified_g__norank_c__Subgroup_22	OTU3879	5	5	10	0	5	0	0	2	3	1	5	5	0	9	8	14	23	1	0	3	1	2	2	1	1	2	8	116
d__Bacteria	k__norank_d__Bacteria	p__Acidobacteria	c__Subgroup_22	o__norank_c__Subgroup_22	f__norank_c__Subgroup_22	g__norank_c__Subgroup_22	s__uncultured_bacterium_g__norank_c__Subgroup_22	OTU2838	5	1	1	0	2	0	0	0	0	1	0	1	0	6	1	12	20	1	0	1	0	6	2	0	1	1	2	64
d__Bacteria	k__norank_d__Bacteria	p__Acidobacteria	c__Subgroup_22	o__norank_c__Subgroup_22	f__norank_c__Subgroup_22	g__norank_c__Subgroup_22	s__uncultured_bacterium_g__norank_c__Subgroup_22	OTU4048	9	5	5	1	2	3	0	4	5	4	4	2	1	5	2	23	27	0	0	3	0	1	1	1	0	0	8	116
d__Bacteria	k__norank_d__Bacteria	p__Acidobacteria	c__Subgroup_22	o__norank_c__Subgroup_22	f__norank_c__Subgroup_22	g__norank_c__Subgroup_22	s__uncultured_Acidobacteriales_bacterium_g__norank	OTU342	32	11	23	7	9	14	15	9	10	49	3	6	32	30	14	52	130	12	17	13	11	51	4	16	32	7	46	655
d__Bacteria	k__norank_d__Bacteria	p__Acidobacteria	c__Subgroup_22	o__norank_c__Subgroup_22	f__norank_c__Subgroup_22	g__norank_c__Subgroup_22	s__unclassified_g__norank_c__Subgroup_22	OTU2781	11	5	4	1	7	8	0	0	2	3	8	10	5	13	6	1	0	9	7	1	2	46	2	8	25	0	4	188
d__Bacteria	k__norank_d__Bacteria	p__Acidobacteria	c__Subgroup_22	o__norank_c__Subgroup_22	f__norank_c__Subgroup_22	g__norank_c__Subgroup_22	s__uncultured_Acidobacteria_bacterium_g__norank_c__Subgroup_22	OTU2935	11	24	10	6	18	8	5	8	11	12	23	5	5	14	12	7	33	4	10	7	3	28	7	13	17	12	10	323
d__Bacteria	k__norank_d__Bacteria	p__Acidobacteria	c__Subgroup_22	o__norank_c__Subgroup_22	f__norank_c__Subgroup_22	g__norank_c__Subgroup_22	s__metagenome_g__norank_c__Subgroup_22	OTU834	11	2	0	0	1	1	0	1	0	0	2	4	0	7	0	46	79	0	0	3	0	3	1	0	5	1	4	171
d__Bacteria	k__norank_d__Bacteria	p__Acidobacteria	c__Subgroup_22	o__norank_c__Subgroup_22	f__norank_c__Subgroup_22	g__norank_c__Subgroup_22	s__uncultured_prokaryote_g__norank_c__Subgroup_22	OTU641	3	1	0	1	3	1	0	1	3	2	4	1	0	11	1	7	21	0	0	3	0	0	3	1	0	1	2	70
d__Bacteria	k__norank_d__Bacteria	p__Acidobacteria	c__Subgroup_22	o__norank_c__Subgroup_22	f__norank_c__Subgroup_22	g__norank_c__Subgroup_22	s__unclassified_g__norank_c__Subgroup_22	OTU1825	7	0	0	0	1	0	0	0	0	0	0	1	0	0	0	117	75	0	0	0	0	0	2	0	0	0	0	203
d__Bacteria	k__norank_d__Bacteria	p__Acidobacteria	c__Subgroup_22	o__norank_c__Subgroup_22	f__norank_c__Subgroup_22	g__norank_c__Subgroup_22	s__unclassified_g__norank_c__Subgroup_22	OTU3895	6	4	2	1	5	0	0	1	2	1	0	0	1	1	2	12	38	0	0	1	0	1	1	0	0	1	4	84
d__Bacteria	k__norank_d__Bacteria	p__Acidobacteria	c__Subgroup_22	o__norank_c__Subgroup_22	f__norank_c__Subgroup_22	g__norank_c__Subgroup_22	s__uncultured_Acidobacteriales_bacterium_g__norank	OTU3878	33	7	6	0	0	0	0	2	0	3	0	0	1	1	0	79	104	3	0	1	1	3	5	1	2	0	15	267
d__Bacteria	k__norank_d__Bacteria	p__Acidobacteria	c__Subgroup_22	o__norank_c__Subgroup_22	f__norank_c__Subgroup_22	g__norank_c__Subgroup_22	s__uncultured_bacterium_g__norank_c__Subgroup_22	OTU2707	6	9	2	0	1	1	0	3	0	1	1	0	0	5	1	0	1	2	1	4	0	10	3	3	8	0	2	64
d__Bacteria	k__norank_d__Bacteria	p__Acidobacteria	c__Subgroup_22	o__norank_c__Subgroup_22	f__norank_c__Subgroup_22	g__norank_c__Subgroup_22	s__unclassified_g__norank_c__Subgroup_22	OTU1808	11	0	0	0	1	0	0	0	0	1	0	1	1	0	2	47	44	0	0	1	0	3	0	0	2	0	4	118
d__Bacteria	k__norank_d__Bacteria	p__Acidobacteria	c__Subgroup_22	o__norank_c__Subgroup_22	f__norank_c__Subgroup_22	g__norank_c__Subgroup_22	s__uncultured_proteobacterium_g__norank_c__Subgroup_22	OTU3407	6	7	4	5	8	5	1	0	3	5	1	8	4	6	6	24	44	2	4	2	0	13	1	3	6	2	14	184
d__Bacteria	k__norank_d__Bacteria	p__Acidobacteria	c__Subgroup_22	o__norank_c__Subgroup_22	f__norank_c__Subgroup_22	g__norank_c__Subgroup_22	s__unclassified_g__norank_c__Subgroup_22	OTU3071	8	1	3	2	2	2	1	0	0	2	1	0	1	2	4	7	8	1	2	2	4	10	0	2	2	1	15	83
d__Bacteria	k__norank_d__Bacteria	p__Acidobacteria	c__Subgroup_22	o__norank_c__Subgroup_22	f__norank_c__Subgroup_22	g__norank_c__Subgroup_22	s__unclassified_g__norank_c__Subgroup_22	OTU3204	12	6	10	1	9	2	0	6	5	2	4	6	1	15	17	5	14	1	0	5	1	2	5	3	2	2	7	143
d__Bacteria	k__norank_d__Bacteria	p__Acidobacteria	c__Subgroup_22	o__norank_c__Subgroup_22	f__norank_c__Subgroup_22	g__norank_c__Subgroup_22	s__unclassified_g__norank_c__Subgroup_22	OTU2804	11	3	2	0	2	2	0	0	0	0	1	4	1	6	4	4	29	0	0	0	0	2	1	0	1	1	3	77
d__Bacteria	k__norank_d__Bacteria	p__Acidobacteria	c__Subgroup_25	o__norank_c__Subgroup_25	f__norank_c__Subgroup_25	g__norank_c__Subgroup_25	s__uncultured_bacterium_g__norank_c__Subgroup_25	OTU1010	37	67	45	14	23	21	8	36	52	35	21	21	9	39	51	17	43	5	18	24	6	24	20	13	6	25	63	743
d__Bacteria	k__norank_d__Bacteria	p__Acidobacteria	c__Subgroup_25	o__norank_c__Subgroup_25	f__norank_c__Subgroup_25	g__norank_c__Subgroup_25	s__uncultured_bacterium_g__norank_c__Subgroup_25	OTU4361	3	1	0	0	1	0	0	0	0	0	0	0	0	1	0	30	94	0	0	2	0	0	5	1	0	2	0	140
d__Bacteria	k__norank_d__Bacteria	p__Acidobacteria	c__Subgroup_25	o__norank_c__Subgroup_25	f__norank_c__Subgroup_25	g__norank_c__Subgroup_25	s__unclassified_g__norank_c__Subgroup_25	OTU1885	11	6	6	3	5	2	0	3	11	2	1	3	0	6	8	6	17	0	0	7	0	1	2	2	0	3	2	107
d__Bacteria	k__norank_d__Bacteria	p__Acidobacteria	c__Subgroup_25	o__norank_c__Subgroup_25	f__norank_c__Subgroup_25	g__norank_c__Subgroup_25	s__uncultured_bacterium_g__norank_c__Subgroup_25	OTU4401	13	6	2	0	7	0	0	6	6	2	2	5	1	5	9	81	116	3	2	4	0	5	11	1	3	2	10	302
d__Bacteria	k__norank_d__Bacteria	p__Acidobacteria	c__Subgroup_25	o__norank_c__Subgroup_25	f__norank_c__Subgroup_25	g__norank_c__Subgroup_25	s__uncultured_bacterium_g__norank_c__Subgroup_25	OTU345	32	5	3	3	5	3	1	11	9	5	6	5	3	17	14	90	153	1	0	10	2	12	14	4	5	6	13	432
d__Bacteria	k__norank_d__Bacteria	p__Acidobacteria	c__Subgroup_25	o__norank_c__Subgroup_25	f__norank_c__Subgroup_25	g__norank_c__Subgroup_25	s__unclassified_g__norank_c__Subgroup_25	OTU2906	0	0	4	0	1	0	2	1	4	2	0	0	3	1	3	0	1	3	1	0	2	7	0	1	9	1	4	50
d__Bacteria	k__norank_d__Bacteria	p__Acidobacteria	c__Subgroup_25	o__norank_c__Subgroup_25	f__norank_c__Subgroup_25	g__norank_c__Subgroup_25	s__uncultured_Acidobacteria_bacterium_g__norank_c__Subgroup_25	OTU2122	3	4	19	3	1	12	5	2	9	7	2	2	8	7	4	0	0	7	3	4	7	7	3	5	10	2	10	146
d__Bacteria	k__norank_d__Bacteria	p__Acidobacteria	c__Subgroup_25	o__norank_c__Subgroup_25	f__norank_c__Subgroup_25	g__norank_c__Subgroup_25	s__uncultured_bacterium_g__norank_c__Subgroup_25	OTU1085	20	10	11	1	17	9	0	6	11	8	5	9	3	17	13	46	87	6	8	13	2	11	9	8	4	7	21	362
d__Bacteria	k__norank_d__Bacteria	p__Acidobacteria	c__Subgroup_25	o__norank_c__Subgroup_25	f__norank_c__Subgroup_25	g__norank_c__Subgroup_25	s__unclassified_g__norank_c__Subgroup_25	OTU146	31	104	16	3	17	10	1	15	16	12	22	11	8	18	20	3	11	2	2	25	0	4	7	27	3	24	15	427
d__Bacteria	k__norank_d__Bacteria	p__Acidobacteria	c__Subgroup_25	o__norank_c__Subgroup_25	f__norank_c__Subgroup_25	g__norank_c__Subgroup_25	s__uncultured_soil_bacterium_g__norank_c__Subgroup_25	OTU3434	8	3	12	2	5	10	4	4	3	2	3	5	9	4	8	1	1	7	12	3	4	19	2	7	15	0	5	158
d__Bacteria	k__norank_d__Bacteria	p__Acidobacteria	c__Subgroup_25	o__norank_c__Subgroup_25	f__norank_c__Subgroup_25	g__norank_c__Subgroup_25	s__uncultured_bacterium_g__norank_c__Subgroup_25	OTU221	13	3	0	1	3	0	1	0	2	1	0	1	0	1	1	13	21	0	0	0	0	1	2	0	0	0	3	67
d__Bacteria	k__norank_d__Bacteria	p__Acidobacteria	c__Subgroup_25	o__norank_c__Subgroup_25	f__norank_c__Subgroup_25	g__norank_c__Subgroup_25	s__uncultured_bacterium_g__norank_c__Subgroup_25	OTU2093	33	34	46	9	18	48	16	37	46	29	14	12	22	42	63	73	89	18	33	27	19	42	18	12	20	14	72	906
d__Bacteria	k__norank_d__Bacteria	p__Acidobacteria	c__Subgroup_25	o__norank_c__Subgroup_25	f__norank_c__Subgroup_25	g__norank_c__Subgroup_25	s__uncultured_Acidobacteria_bacterium_g__norank_c__Subgroup_25	OTU2165	27	48	36	4	27	41	12	6	24	15	35	38	22	58	34	16	17	30	20	31	10	25	27	43	34	37	18	735
d__Bacteria	k__norank_d__Bacteria	p__Acidobacteria	c__Subgroup_25	o__norank_c__Subgroup_25	f__norank_c__Subgroup_25	g__norank_c__Subgroup_25	s__uncultured_bacterium_g__norank_c__Subgroup_25	OTU3917	5	0	2	0	3	7	0	3	3	0	0	3	1	4	7	1	10	4	0	1	0	2	0	2	2	1	8	69
d__Bacteria	k__norank_d__Bacteria	p__Acidobacteria	c__Subgroup_25	o__norank_c__Subgroup_25	f__norank_c__Subgroup_25	g__norank_c__Subgroup_25	s__uncultured_soil_bacterium_g__norank_c__Subgroup_25	OTU1872	5	2	8	1	1	0	1	2	2	3	3	2	2	4	3	3	8	3	9	1	0	10	1	2	7	2	3	88
d__Bacteria	k__norank_d__Bacteria	p__Acidobacteria	c__Subgroup_5	o__norank_c__Subgroup_5	f__norank_c__Subgroup_5	g__norank_c__Subgroup_5	s__uncultured_bacterium_g__norank_c__Subgroup_5	OTU4540	9	5	1	1	4	1	0	2	0	1	5	4	3	11	4	8	11	8	2	5	4	11	2	3	8	1	0	114
d__Bacteria	k__norank_d__Bacteria	p__Acidobacteria	c__Subgroup_5	o__norank_c__Subgroup_5	f__norank_c__Subgroup_5	g__norank_c__Subgroup_5	s__unclassified_g__norank_c__Subgroup_5	OTU658	4	3	0	0	6	3	0	0	0	0	4	4	1	3	4	1	9	3	1	3	1	6	2	0	8	1	0	67
d__Bacteria	k__norank_d__Bacteria	p__Acidobacteria	c__Subgroup_5	o__norank_c__Subgroup_5	f__norank_c__Subgroup_5	g__norank_c__Subgroup_5	s__unclassified_g__norank_c__Subgroup_5	OTU3328	1	2	0	0	2	4	1	0	0	2	1	1	4	4	3	0	5	4	4	1	1	13	2	2	8	0	2	67
d__Bacteria	k__norank_d__Bacteria	p__Acidobacteria	c__Subgroup_5	o__norank_c__Subgroup_5	f__norank_c__Subgroup_5	g__norank_c__Subgroup_5	s__metagenome_g__norank_c__Subgroup_5	OTU1800	5	10	5	0	3	2	3	0	0	1	4	1	3	3	6	4	3	6	1	3	4	16	1	3	7	2	1	97
d__Bacteria	k__norank_d__Bacteria	p__Acidobacteria	c__Subgroup_5	o__norank_c__Subgroup_5	f__norank_c__Subgroup_5	g__norank_c__Subgroup_5	s__metagenome_g__norank_c__Subgroup_5	OTU3927	10	10	2	3	7	4	1	0	2	2	2	4	2	10	7	6	7	7	1	3	2	7	3	4	13	2	6	127
d__Bacteria	k__norank_d__Bacteria	p__Acidobacteria	c__Subgroup_5	o__norank_c__Subgroup_5	f__norank_c__Subgroup_5	g__norank_c__Subgroup_5	s__unclassified_g__norank_c__Subgroup_5	OTU451	4	13	1	0	9	1	3	2	2	2	8	8	0	13	10	5	5	5	2	8	3	7	4	5	20	1	3	144
d__Bacteria	k__norank_d__Bacteria	p__Acidobacteria	c__Subgroup_5	o__norank_c__Subgroup_5	f__norank_c__Subgroup_5	g__norank_c__Subgroup_5	s__uncultured_Acidobacteriales_bacterium_g__norank_c__Subgroup_5	OTU3196	11	23	2	2	26	3	0	2	5	1	17	18	1	43	5	10	34	3	1	9	2	28	8	10	24	8	3	299
d__Bacteria	k__norank_d__Bacteria	p__Acidobacteria	c__Subgroup_6	o__norank_c__Subgroup_6	f__norank_c__Subgroup_6	g__norank_c__Subgroup_6	s__unclassified_g__norank_c__Subgroup_6	OTU905	7	9	0	0	12	3	2	1	3	3	1	11	1	4	8	14	20	0	1	2	0	3	7	0	5	3	3	123
d__Bacteria	k__norank_d__Bacteria	p__Acidobacteria	c__Subgroup_6	o__norank_c__Subgroup_6	f__norank_c__Subgroup_6	g__norank_c__Subgroup_6	s__unclassified_g__norank_c__Subgroup_6	OTU3160	7	45	3	0	17	0	0	5	9	2	12	10	0	4	4	1	5	1	2	10	0	1	8	14	6	9	3	178
d__Bacteria	k__norank_d__Bacteria	p__Acidobacteria	c__Subgroup_6	o__norank_c__Subgroup_6	f__norank_c__Subgroup_6	g__norank_c__Subgroup_6	s__metagenome_g__norank_c__Subgroup_6	OTU3894	23	56	15	4	50	28	3	33	45	26	55	39	12	54	82	19	41	8	15	49	11	21	26	23	47	47	12	844
d__Bacteria	k__norank_d__Bacteria	p__Acidobacteria	c__Subgroup_6	o__norank_c__Subgroup_6	f__norank_c__Subgroup_6	g__norank_c__Subgroup_6	s__unclassified_g__norank_c__Subgroup_6	OTU3002	91	157	81	16	130	55	59	26	54	37	108	84	44	176	139	127	121	124	70	78	43	305	91	59	198	53	67	2593
d__Bacteria	k__norank_d__Bacteria	p__Acidobacteria	c__Subgroup_6	o__norank_c__Subgroup_6	f__norank_c__Subgroup_6	g__norank_c__Subgroup_6	s__unclassified_g__norank_c__Subgroup_6	OTU3448	60	101	72	25	65	14	13	43	56	34	78	40	32	71	45	27	34	30	29	61	11	42	39	44	65	31	44	1206
d__Bacteria	k__norank_d__Bacteria	p__Acidobacteria	c__Subgroup_6	o__norank_c__Subgroup_6	f__norank_c__Subgroup_6	g__norank_c__Subgroup_6	s__uncultured_Holophaga_sp._g__norank_c__Subgroup_6	OTU2755	9	26	7	0	20	2	2	2	5	0	11	14	3	25	7	12	8	9	4	12	1	16	7	23	17	6	2	250
d__Bacteria	k__norank_d__Bacteria	p__Acidobacteria	c__Subgroup_6	o__norank_c__Subgroup_6	f__norank_c__Subgroup_6	g__norank_c__Subgroup_6	s__unclassified_g__norank_c__Subgroup_6	OTU335	30	23	32	11	20	17	19	9	11	25	19	14	25	60	30	14	12	66	37	26	18	111	27	31	89	21	26	823
d__Bacteria	k__norank_d__Bacteria	p__Acidobacteria	c__Subgroup_6	o__norank_c__Subgroup_6	f__norank_c__Subgroup_6	g__norank_c__Subgroup_6	s__unclassified_g__norank_c__Subgroup_6	OTU2036	3	10	8	2	18	7	15	5	8	6	13	10	10	6	4	8	3	37	9	28	4	15	11	4	12	8	5	269
d__Bacteria	k__norank_d__Bacteria	p__Acidobacteria	c__Subgroup_6	o__norank_c__Subgroup_6	f__norank_c__Subgroup_6	g__norank_c__Subgroup_6	s__unclassified_g__norank_c__Subgroup_6	OTU4283	8	10	1	2	5	4	4	0	1	3	2	5	8	8	8	15	16	4	1	6	4	23	9	7	14	1	12	181
d__Bacteria	k__norank_d__Bacteria	p__Acidobacteria	c__Subgroup_6	o__norank_c__Subgroup_6	f__norank_c__Subgroup_6	g__norank_c__Subgroup_6	s__unclassified_g__norank_c__Subgroup_6	OTU4608	1	0	2	2	0	1	2	0	0	11	0	0	3	0	0	0	0	6	5	0	2	5	0	2	7	1	5	55
d__Bacteria	k__norank_d__Bacteria	p__Acidobacteria	c__Subgroup_6	o__norank_c__Subgroup_6	f__norank_c__Subgroup_6	g__norank_c__Subgroup_6	s__unclassified_g__norank_c__Subgroup_6	OTU1399	3	8	2	1	4	0	0	1	10	0	3	3	0	12	5	11	17	0	0	7	0	0	6	2	1	4	2	102
d__Bacteria	k__norank_d__Bacteria	p__Acidobacteria	c__Subgroup_6	o__norank_c__Subgroup_6	f__norank_c__Subgroup_6	g__norank_c__Subgroup_6	s__unclassified_g__norank_c__Subgroup_6	OTU2732	3	1	1	2	0	5	5	0	0	2	1	0	0	0	2	0	0	1	4	1	2	8	0	0	9	0	5	52
d__Bacteria	k__norank_d__Bacteria	p__Acidobacteria	c__Subgroup_6	o__norank_c__Subgroup_6	f__norank_c__Subgroup_6	g__norank_c__Subgroup_6	s__unclassified_g__norank_c__Subgroup_6	OTU3557	12	23	10	5	33	18	12	2	11	7	24	29	8	30	15	7	5	40	9	17	8	36	23	20	39	13	14	470
d__Bacteria	k__norank_d__Bacteria	p__Acidobacteria	c__Subgroup_6	o__norank_c__Subgroup_6	f__norank_c__Subgroup_6	g__norank_c__Subgroup_6	s__unclassified_g__norank_c__Subgroup_6	OTU1988	46	124	28	10	41	19	14	17	22	22	33	27	31	37	35	37	36	75	14	34	12	61	31	38	40	23	24	931
d__Bacteria	k__norank_d__Bacteria	p__Acidobacteria	c__Subgroup_6	o__norank_c__Subgroup_6	f__norank_c__Subgroup_6	g__norank_c__Subgroup_6	s__unclassified_g__norank_c__Subgroup_6	OTU425	2	2	3	0	4	2	1	0	3	0	5	3	1	1	4	1	1	0	1	5	1	3	1	3	4	1	2	54
d__Bacteria	k__norank_d__Bacteria	p__Acidobacteria	c__Subgroup_6	o__norank_c__Subgroup_6	f__norank_c__Subgroup_6	g__norank_c__Subgroup_6	s__unclassified_g__norank_c__Subgroup_6	OTU1888	227	515	155	44	202	104	34	125	146	96	200	164	77	214	192	82	140	107	90	205	39	228	190	133	175	126	149	4159
d__Bacteria	k__norank_d__Bacteria	p__Acidobacteria	c__Subgroup_6	o__norank_c__Subgroup_6	f__norank_c__Subgroup_6	g__norank_c__Subgroup_6	s__unclassified_g__norank_c__Subgroup_6	OTU2198	16	7	12	2	17	2	5	3	10	7	8	20	6	8	18	13	17	14	10	4	1	30	11	8	20	7	19	295
d__Bacteria	k__norank_d__Bacteria	p__Acidobacteria	c__Subgroup_6	o__norank_c__Subgroup_6	f__norank_c__Subgroup_6	g__norank_c__Subgroup_6	s__unclassified_g__norank_c__Subgroup_6	OTU3052	64	67	25	5	30	21	11	10	21	18	32	31	26	32	28	18	42	23	15	27	9	52	32	27	25	7	32	730
d__Bacteria	k__norank_d__Bacteria	p__Acidobacteria	c__Subgroup_6	o__norank_c__Subgroup_6	f__norank_c__Subgroup_6	g__norank_c__Subgroup_6	s__unclassified_g__norank_c__Subgroup_6	OTU3133	72	113	40	8	93	38	17	23	32	16	87	79	20	119	78	49	75	43	26	62	7	80	60	57	68	51	28	1441
d__Bacteria	k__norank_d__Bacteria	p__Acidobacteria	c__Subgroup_6	o__norank_c__Subgroup_6	f__norank_c__Subgroup_6	g__norank_c__Subgroup_6	s__unclassified_g__norank_c__Subgroup_6	OTU4133	7	14	4	1	11	5	2	1	1	2	9	5	0	11	7	15	17	3	4	6	0	6	7	3	6	3	1	151
d__Bacteria	k__norank_d__Bacteria	p__Acidobacteria	c__Subgroup_6	o__norank_c__Subgroup_6	f__norank_c__Subgroup_6	g__norank_c__Subgroup_6	s__unclassified_g__norank_c__Subgroup_6	OTU3046	6	9	2	0	22	5	2	2	5	3	16	10	0	10	12	2	2	0	0	2	0	1	4	2	1	6	2	126
d__Bacteria	k__norank_d__Bacteria	p__Acidobacteria	c__Subgroup_6	o__norank_c__Subgroup_6	f__norank_c__Subgroup_6	g__norank_c__Subgroup_6	s__unclassified_g__norank_c__Subgroup_6	OTU685	11	41	1	0	38	10	0	10	12	8	14	17	3	30	25	25	22	5	3	11	2	13	10	11	13	11	13	359
d__Bacteria	k__norank_d__Bacteria	p__Acidobacteria	c__Subgroup_6	o__norank_c__Subgroup_6	f__norank_c__Subgroup_6	g__norank_c__Subgroup_6	s__metagenome_g__norank_c__Subgroup_6	OTU2958	20	56	10	4	46	24	5	41	44	4	29	43	13	38	62	11	20	9	19	9	3	44	19	6	29	21	21	650
d__Bacteria	k__norank_d__Bacteria	p__Acidobacteria	c__Subgroup_6	o__norank_c__Subgroup_6	f__norank_c__Subgroup_6	g__norank_c__Subgroup_6	s__unclassified_g__norank_c__Subgroup_6	OTU2933	23	15	14	5	24	16	8	17	26	16	11	12	5	31	19	25	30	7	8	6	7	7	20	7	5	11	19	394
d__Bacteria	k__norank_d__Bacteria	p__Acidobacteria	c__Subgroup_6	o__norank_c__Subgroup_6	f__norank_c__Subgroup_6	g__norank_c__Subgroup_6	s__unclassified_g__norank_c__Subgroup_6	OTU4005	33	23	32	22	23	24	20	10	28	18	33	35	24	24	28	6	9	34	25	22	8	55	24	38	70	27	15	710
d__Bacteria	k__norank_d__Bacteria	p__Acidobacteria	c__Subgroup_6	o__norank_c__Subgroup_6	f__norank_c__Subgroup_6	g__norank_c__Subgroup_6	s__unclassified_g__norank_c__Subgroup_6	OTU1984	5	16	8	1	11	3	7	7	6	2	9	3	2	10	8	0	4	4	3	2	1	7	4	4	9	3	4	143
d__Bacteria	k__norank_d__Bacteria	p__Acidobacteria	c__Subgroup_6	o__norank_c__Subgroup_6	f__norank_c__Subgroup_6	g__norank_c__Subgroup_6	s__unclassified_g__norank_c__Subgroup_6	OTU2929	340	439	282	70	523	222	83	85	189	127	482	501	147	589	378	181	314	479	141	400	69	350	353	363	391	291	161	7950
d__Bacteria	k__norank_d__Bacteria	p__Acidobacteria	c__Subgroup_6	o__norank_c__Subgroup_6	f__norank_c__Subgroup_6	g__norank_c__Subgroup_6	s__uncultured_soil_bacterium_g__norank_c__Subgroup_6	OTU3105	42	66	36	6	96	28	1	19	25	11	35	50	9	65	43	55	135	12	8	24	3	36	52	20	17	33	41	968
d__Bacteria	k__norank_d__Bacteria	p__Acidobacteria	c__Subgroup_6	o__norank_c__Subgroup_6	f__norank_c__Subgroup_6	g__norank_c__Subgroup_6	s__unclassified_g__norank_c__Subgroup_6	OTU2785	32	80	13	9	34	23	12	19	17	8	34	16	11	31	36	11	15	16	13	44	11	29	20	19	36	23	21	633
d__Bacteria	k__norank_d__Bacteria	p__Acidobacteria	c__Subgroup_6	o__norank_c__Subgroup_6	f__norank_c__Subgroup_6	g__norank_c__Subgroup_6	s__unclassified_g__norank_c__Subgroup_6	OTU2561	2	0	0	1	0	4	1	2	1	2	0	2	1	0	5	0	0	2	4	0	5	8	0	0	5	0	2	47
d__Bacteria	k__norank_d__Bacteria	p__Acidobacteria	c__Subgroup_6	o__norank_c__Subgroup_6	f__norank_c__Subgroup_6	g__norank_c__Subgroup_6	s__uncultured_Acidobacteriales_bacterium_g__norank_c__Subgroup_6	OTU2802	47	19	44	19	33	43	29	7	43	26	46	57	35	37	38	39	131	69	43	32	24	102	31	28	64	21	29	1136
d__Bacteria	k__norank_d__Bacteria	p__Acidobacteria	c__Subgroup_6	o__norank_c__Subgroup_6	f__norank_c__Subgroup_6	g__norank_c__Subgroup_6	s__uncultured_Holophaga_sp._g__norank_c__Subgroup_6	OTU493	35	31	14	4	37	14	5	3	18	4	24	27	4	39	22	75	75	15	9	25	3	41	32	11	32	15	16	630
d__Bacteria	k__norank_d__Bacteria	p__Acidobacteria	c__Subgroup_6	o__norank_c__Subgroup_6	f__norank_c__Subgroup_6	g__norank_c__Subgroup_6	s__unclassified_g__norank_c__Subgroup_6	OTU2699	25	31	16	5	27	18	9	15	25	6	31	13	14	18	34	14	15	17	13	19	3	29	23	17	15	15	14	481
d__Bacteria	k__norank_d__Bacteria	p__Acidobacteria	c__Subgroup_6	o__norank_c__Subgroup_6	f__norank_c__Subgroup_6	g__norank_c__Subgroup_6	s__metagenome_g__norank_c__Subgroup_6	OTU2702	15	22	7	3	27	13	10	5	9	4	30	24	18	19	23	15	15	37	9	18	10	44	17	23	30	8	8	463
d__Bacteria	k__norank_d__Bacteria	p__Acidobacteria	c__Subgroup_6	o__norank_c__Subgroup_6	f__norank_c__Subgroup_6	g__norank_c__Subgroup_6	s__unclassified_g__norank_c__Subgroup_6	OTU2907	58	98	30	5	126	54	17	27	42	22	65	71	25	68	109	52	83	28	27	55	9	54	58	39	30	58	36	1346
d__Bacteria	k__norank_d__Bacteria	p__Acidobacteria	c__Subgroup_6	o__norank_c__Subgroup_6	f__norank_c__Subgroup_6	g__norank_c__Subgroup_6	s__unclassified_g__norank_c__Subgroup_6	OTU655	18	15	7	1	14	3	4	1	5	3	18	19	6	13	13	17	17	20	7	6	2	26	16	13	34	0	6	304
d__Bacteria	k__norank_d__Bacteria	p__Acidobacteria	c__Subgroup_6	o__norank_c__Subgroup_6	f__norank_c__Subgroup_6	g__norank_c__Subgroup_6	s__unclassified_g__norank_c__Subgroup_6	OTU4267	2	0	0	0	1	2	0	0	0	0	2	1	1	4	3	4	4	1	1	3	0	2	1	2	5	0	1	40
d__Bacteria	k__norank_d__Bacteria	p__Acidobacteria	c__Subgroup_6	o__norank_c__Subgroup_6	f__norank_c__Subgroup_6	g__norank_c__Subgroup_6	s__unclassified_g__norank_c__Subgroup_6	OTU1587	16	22	5	1	40	7	5	6	18	7	30	25	3	21	41	7	4	6	14	13	1	11	15	26	12	51	6	413
d__Bacteria	k__norank_d__Bacteria	p__Acidobacteria	c__Subgroup_6	o__norank_c__Subgroup_6	f__norank_c__Subgroup_6	g__norank_c__Subgroup_6	s__unclassified_g__norank_c__Subgroup_6	OTU2378	4	4	0	0	2	0	0	0	1	0	1	3	0	0	3	5	1	2	1	1	0	1	3	1	1	1	0	35
d__Bacteria	k__norank_d__Bacteria	p__Acidobacteria	c__Subgroup_6	o__norank_c__Subgroup_6	f__norank_c__Subgroup_6	g__norank_c__Subgroup_6	s__metagenome_g__norank_c__Subgroup_6	OTU3910	41	46	73	20	12	25	19	21	13	63	22	20	25	36	27	10	2	29	14	29	10	63	47	32	38	41	49	827
d__Bacteria	k__norank_d__Bacteria	p__Acidobacteria	c__Subgroup_6	o__norank_c__Subgroup_6	f__norank_c__Subgroup_6	g__norank_c__Subgroup_6	s__unclassified_g__norank_c__Subgroup_6	OTU3977	26	23	17	8	46	27	5	5	23	8	33	35	8	26	43	9	17	17	20	19	5	33	24	18	24	20	17	556
d__Bacteria	k__norank_d__Bacteria	p__Acidobacteria	c__Subgroup_6	o__norank_c__Subgroup_6	f__norank_c__Subgroup_6	g__norank_c__Subgroup_6	s__unclassified_g__norank_c__Subgroup_6	OTU4524	30	41	57	23	49	37	47	23	32	42	49	44	30	50	47	19	20	27	46	34	16	80	24	31	75	36	43	1052
d__Bacteria	k__norank_d__Bacteria	p__Acidobacteria	c__Subgroup_6	o__norank_c__Subgroup_6	f__norank_c__Subgroup_6	g__norank_c__Subgroup_6	s__uncultured_Acidobacteriales_bacterium_g__norank_c__Subgroup_6	OTU2282	4	6	5	1	13	1	1	3	3	1	5	8	1	13	9	2	5	7	2	5	1	10	3	3	9	3	0	124
d__Bacteria	k__norank_d__Bacteria	p__Acidobacteria	c__Subgroup_6	o__norank_c__Subgroup_6	f__norank_c__Subgroup_6	g__norank_c__Subgroup_6	s__uncultured_bacterium_g__norank_c__Subgroup_6	OTU2966	7	1	5	1	7	5	12	2	2	2	5	7	8	6	5	2	0	19	3	28	3	3	6	7	8	2	3	159
d__Bacteria	k__norank_d__Bacteria	p__Acidobacteria	c__Subgroup_6	o__norank_c__Subgroup_6	f__norank_c__Subgroup_6	g__norank_c__Subgroup_6	s__unclassified_g__norank_c__Subgroup_6	OTU2956	57	114	20	3	50	5	4	12	77	11	57	39	2	94	21	4	13	5	3	69	2	7	46	13	20	40	10	798
d__Bacteria	k__norank_d__Bacteria	p__Acidobacteria	c__Subgroup_9	o__norank_c__Subgroup_9	f__norank_c__Subgroup_9	g__norank_c__Subgroup_9	s__unclassified_g__norank_c__Subgroup_9	OTU3026	50	60	26	7	30	11	3	5	17	9	19	26	4	39	29	201	284	7	4	20	4	12	33	15	9	15	21	960
d__Bacteria	k__norank_d__Bacteria	p__Chloroflexi	c__TK10	o__norank_c__TK10	f__norank_c__TK10	g__norank_c__TK10	s__unclassified_g__norank_c__TK10	OTU3201	10	14	4	3	6	3	1	1	1	0	30	10	7	19	2	12	7	12	5	14	1	29	20	9	23	3	6	252
d__Bacteria	k__norank_d__Bacteria	p__Nitrospirae	c__Thermodesulfovibrionia	o__norank_c__Thermodesulfovibrionia	f__norank_c__Thermodesulfovibrionia	g__norank_c__Thermodesulfovibrionia	s__uncultured_bacterium_g__norank_c__Thermodesulfovibrionia	OTU2275	3	1	1	0	3	0	0	0	3	0	0	2	0	2	1	17	5	4	0	3	0	1	0	1	1	3	6	57
d__Bacteria	k__norank_d__Bacteria	p__Nitrospirae	c__Thermodesulfovibrionia	o__norank_c__Thermodesulfovibrionia	f__norank_c__Thermodesulfovibrionia	g__norank_c__Thermodesulfovibrionia	s__unclassified_g__norank_c__Thermodesulfovibrionia	OTU4264	1	1	0	0	0	0	0	0	0	1	0	1	0	1	0	24	29	0	1	0	0	1	1	0	1	0	5	67
d__Bacteria	k__norank_d__Bacteria	p__Nitrospirae	c__Thermodesulfovibrionia	o__norank_c__Thermodesulfovibrionia	f__norank_c__Thermodesulfovibrionia	g__norank_c__Thermodesulfovibrionia	s__uncultured_bacterium_g__norank_c__Thermodesulfovibrionia	OTU1161	5	1	0	0	4	0	0	0	5	1	0	1	1	3	1	1	4	0	0	1	0	1	2	0	0	1	13	45
d__Bacteria	k__norank_d__Bacteria	p__Nitrospirae	c__Thermodesulfovibrionia	o__norank_c__Thermodesulfovibrionia	f__norank_c__Thermodesulfovibrionia	g__norank_c__Thermodesulfovibrionia	s__uncultured_bacterium_g__norank_c__Thermodesulfovibrionia	OTU2096	2	1	1	0	0	3	0	2	1	1	0	0	1	0	0	6	5	0	1	2	0	1	1	0	0	4	5	37
d__Bacteria	k__norank_d__Bacteria	p__Nitrospirae	c__Thermodesulfovibrionia	o__norank_c__Thermodesulfovibrionia	f__norank_c__Thermodesulfovibrionia	g__norank_c__Thermodesulfovibrionia	s__uncultured_bacterium_g__norank_c__Thermodesulfovibrionia	OTU2305	7	7	2	0	6	0	1	1	4	2	1	0	0	2	3	1	11	4	0	8	0	3	1	2	5	4	2	77
d__Bacteria	k__norank_d__Bacteria	p__Nitrospirae	c__Thermodesulfovibrionia	o__norank_c__Thermodesulfovibrionia	f__norank_c__Thermodesulfovibrionia	g__norank_c__Thermodesulfovibrionia	s__unclassified_g__norank_c__Thermodesulfovibrionia	OTU2140	19	24	6	2	19	6	6	1	5	5	6	11	3	15	8	16	62	6	4	7	0	8	5	4	5	9	16	278
d__Bacteria	k__norank_d__Bacteria	p__Planctomycetes	c__vadinHA49	o__norank_c__vadinHA49	f__norank_c__vadinHA49	g__norank_c__vadinHA49	s__unclassified_g__norank_c__vadinHA49	OTU2172	18	13	30	1	0	1	5	1	3	6	3	1	0	4	0	0	1	3	0	2	0	4	2	3	9	3	13	126
d__Bacteria	k__norank_d__Bacteria	p__Planctomycetes	c__vadinHA49	o__norank_c__vadinHA49	f__norank_c__vadinHA49	g__norank_c__vadinHA49	s__uncultured_soil_bacterium_g__norank_c__vadinHA49	OTU153	0	0	0	0	0	0	0	10	0	0	1	0	0	5	2	0	0	0	0	16	0	0	3	0	5	0	1	43
d__Bacteria	k__norank_d__Bacteria	p__Planctomycetes	c__vadinHA49	o__norank_c__vadinHA49	f__norank_c__vadinHA49	g__norank_c__vadinHA49	s__uncultured_bacterium_g__norank_c__vadinHA49	OTU2270	0	0	0	0	0	5	0	0	0	13	0	2	1	0	0	0	0	9	15	0	0	16	0	4	4	0	8	77
d__Bacteria	k__norank_d__Bacteria	p__Planctomycetes	c__vadinHA49	o__norank_c__vadinHA49	f__norank_c__vadinHA49	g__norank_c__vadinHA49	s__uncultured_Planctomycetales_bacterium_g__norank_c__vadinHA49	OTU2130	15	10	22	2	1	1	1	11	3	20	2	1	7	14	13	2	1	8	3	5	0	7	4	1	9	16	5	184
d__Bacteria	k__norank_d__Bacteria	p__Planctomycetes	c__vadinHA49	o__norank_c__vadinHA49	f__norank_c__vadinHA49	g__norank_c__vadinHA49	s__uncultured_Planctomycetales_bacterium_g__norank_c__vadinHA49	OTU448	6	13	31	1	12	1	0	4	3	6	7	3	1	12	5	2	1	1	3	23	1	6	20	14	31	10	17	234
d__Bacteria	k__norank_d__Bacteria	p__Planctomycetes	c__vadinHA49	o__norank_c__vadinHA49	f__norank_c__vadinHA49	g__norank_c__vadinHA49	s__uncultured_bacterium_g__norank_c__vadinHA49	OTU4356	11	20	7	0	6	3	0	7	2	2	6	4	1	10	5	13	21	1	0	4	0	7	2	0	3	2	5	142
d__Bacteria	k__norank_d__Bacteria	p__Proteobacteria	c__Deltaproteobacteria	o__Oligoflexales	f__0319-6G20	g__norank_f__0319-6G20	s__uncultured_Roseobacter_sp._g__norank	OTU3024	2	0	2	2	2	1	0	5	1	0	4	0	4	8	0	1	0	2	4	2	0	1	1	3	3	6	4	58
d__Bacteria	k__norank_d__Bacteria	p__Proteobacteria	c__Deltaproteobacteria	o__Oligoflexales	f__0319-6G20	g__norank_f__0319-6G20	s__unclassified_g__norank_f__0319-6G20	OTU3293	1	0	0	1	0	0	1	3	0	0	8	4	0	2	3	0	0	0	3	2	0	4	3	3	3	1	5	47
d__Bacteria	k__norank_d__Bacteria	p__Bacteroidetes	c__Bacteroidia	o__Chitinophagales	f__37-13	g__norank_f__37-13	s__uncultured_bacterium_g__norank_f__37-13	OTU1445	6	7	4	0	1	1	0	7	3	2	5	2	1	5	7	0	3	0	2	3	0	0	3	2	3	8	2	77
d__Bacteria	k__norank_d__Bacteria	p__Bacteroidetes	c__Bacteroidia	o__Chitinophagales	f__37-13	g__norank_f__37-13	s__uncultured_bacterium_g__norank_f__37-13	OTU348	7	9	2	0	1	0	0	2	4	2	3	0	0	8	3	1	3	0	0	6	1	0	2	0	9	4	1	68
d__Bacteria	k__norank_d__Bacteria	p__Bacteroidetes	c__Bacteroidia	o__Chitinophagales	f__37-13	g__norank_f__37-13	s__uncultured_Sphingobacteriales_bacterium_g__norank_f__37-13	OTU837	0	4	2	0	1	0	1	2	2	1	0	6	0	2	3	2	0	1	2	4	0	6	5	1	1	2	5	53
d__Bacteria	k__norank_d__Bacteria	p__Bacteroidetes	c__Bacteroidia	o__Chitinophagales	f__37-13	g__norank_f__37-13	s__uncultured_bacterium_g__norank_f__37-13	OTU4289	2	3	0	2	2	0	0	1	3	0	1	1	2	7	0	0	0	4	3	1	0	7	1	0	1	0	5	46
d__Bacteria	k__norank_d__Bacteria	p__Actinobacteria	c__Actinobacteria	o__Solirubrobacterales	f__67-14	g__norank_f__67-14	s__unclassified_g__norank_f__67-14	OTU3343	1	6	3	2	3	6	0	1	2	1	5	8	5	5	11	10	3	8	8	6	0	10	18	11	5	5	10	153
d__Bacteria	k__norank_d__Bacteria	p__Actinobacteria	c__Actinobacteria	o__Solirubrobacterales	f__67-14	g__norank_f__67-14	s__unclassified_g__norank_f__67-14	OTU3210	3	1	1	1	2	2	0	0	0	1	1	4	2	2	0	5	3	7	2	3	0	4	6	2	6	2	0	60
d__Bacteria	k__norank_d__Bacteria	p__Actinobacteria	c__Actinobacteria	o__Solirubrobacterales	f__67-14	g__norank_f__67-14	s__unclassified_g__norank_f__67-14	OTU3877	6	7	1	1	15	3	0	1	2	1	16	9	2	10	5	9	12	8	1	9	2	4	18	6	3	2	3	156
d__Bacteria	k__norank_d__Bacteria	p__Actinobacteria	c__Actinobacteria	o__Solirubrobacterales	f__67-14	g__norank_f__67-14	s__uncultured_bacterium_g__norank_f__67-14	OTU746	4	2	0	0	2	0	0	0	0	0	4	6	0	1	1	2	1	0	0	4	1	0	5	2	3	0	2	40
d__Bacteria	k__norank_d__Bacteria	p__Actinobacteria	c__Actinobacteria	o__Solirubrobacterales	f__67-14	g__norank_f__67-14	s__uncultured_Rubrobacteria_bacterium_g__norank_f__67-14	OTU3365	4	7	1	0	4	0	4	0	4	1	11	11	2	3	3	6	8	6	2	10	1	5	10	7	5	4	7	126
d__Bacteria	k__norank_d__Bacteria	p__Actinobacteria	c__Actinobacteria	o__Solirubrobacterales	f__67-14	g__norank_f__67-14	s__unclassified_g__norank_f__67-14	OTU2747	3	5	1	0	11	6	2	1	1	2	17	18	4	9	13	17	10	21	5	12	2	14	12	11	16	3	4	220
d__Bacteria	k__norank_d__Bacteria	p__Actinobacteria	c__Actinobacteria	o__Solirubrobacterales	f__67-14	g__norank_f__67-14	s__uncultured_soil_bacterium_g__norank_f__67-14	OTU2977	2	2	5	0	2	1	0	1	2	2	10	2	0	6	1	5	1	5	2	4	1	3	1	0	4	5	1	68
d__Bacteria	k__norank_d__Bacteria	p__Actinobacteria	c__Actinobacteria	o__Solirubrobacterales	f__67-14	g__norank_f__67-14	s__uncultured_bacterium_g__norank_f__67-14	OTU1524	3	2	0	0	3	1	0	0	1	0	10	4	0	2	0	4	2	5	0	2	1	1	4	6	4	1	3	59
d__Bacteria	k__norank_d__Bacteria	p__Actinobacteria	c__Actinobacteria	o__Solirubrobacterales	f__67-14	g__norank_f__67-14	s__uncultured_Rubrobacteria_bacterium_g__norank_f__67-14	OTU3191	6	6	4	0	4	1	0	0	1	0	7	6	3	10	0	2	2	4	3	5	1	2	11	1	6	3	2	90
d__Bacteria	k__norank_d__Bacteria	p__Actinobacteria	c__Actinobacteria	o__Solirubrobacterales	f__67-14	g__norank_f__67-14	s__unclassified_g__norank_f__67-14	OTU300	15	9	7	5	2	2	6	0	0	8	0	7	15	4	2	2	3	6	5	0	3	5	3	3	8	0	4	124
d__Bacteria	k__norank_d__Bacteria	p__Actinobacteria	c__Actinobacteria	o__Solirubrobacterales	f__67-14	g__norank_f__67-14	s__unclassified_g__norank_f__67-14	OTU3140	2	3	1	1	2	3	1	0	1	1	5	5	2	3	1	3	7	2	1	1	0	2	4	3	2	0	2	58
d__Bacteria	k__norank_d__Bacteria	p__Proteobacteria	c__Alphaproteobacteria	o__Rhizobiales	f__A0839	g__norank_f__A0839	s__uncultured_bacterium_g__norank_f__A0839	OTU4087	2	0	1	0	1	1	0	0	0	1	2	1	0	6	4	17	3	2	1	1	1	6	1	0	4	0	0	55
d__Bacteria	k__norank_d__Bacteria	p__Proteobacteria	c__Gammaproteobacteria	o__Betaproteobacteriales	f__A21b	g__norank_f__A21b	s__uncultured_bacterium_g__norank_f__A21b	OTU2622	2	3	2	0	5	2	1	2	1	0	4	9	2	6	5	1	3	7	1	4	2	6	1	3	0	5	4	81
d__Bacteria	k__norank_d__Bacteria	p__Proteobacteria	c__Gammaproteobacteria	o__Betaproteobacteriales	f__A21b	g__norank_f__A21b	s__unclassified_g__norank_f__A21b	OTU2621	0	0	2	0	0	0	2	0	0	0	0	3	0	0	4	1	0	4	4	1	0	13	0	0	3	0	1	38
d__Bacteria	k__norank_d__Bacteria	p__Chloroflexi	c__Anaerolineae	o__SBR1031	f__A4b	g__norank_f__A4b	s__uncultured_bacterium_g__norank_f__A4b	OTU819	2	1	0	0	5	2	2	0	0	0	2	3	1	2	1	4	10	0	0	0	0	2	2	1	0	2	3	45
d__Bacteria	k__norank_d__Bacteria	p__Chloroflexi	c__Anaerolineae	o__SBR1031	f__A4b	g__norank_f__A4b	s__unclassified_g__norank_f__A4b	OTU1784	0	0	0	0	0	0	0	0	0	0	1	1	0	0	1	0	0	5	0	0	0	7	0	0	9	0	0	24
d__Bacteria	k__norank_d__Bacteria	p__Chloroflexi	c__Anaerolineae	o__SBR1031	f__A4b	g__norank_f__A4b	s__uncultured_Caldilineaceae_bacterium_g__norank_f__A4b	OTU1969	2	9	2	0	4	1	0	2	4	4	5	8	2	6	8	0	3	0	1	0	0	0	2	4	12	8	3	90
d__Bacteria	k__norank_d__Bacteria	p__Chloroflexi	c__Anaerolineae	o__SBR1031	f__A4b	g__norank_f__A4b	s__unclassified_g__norank_f__A4b	OTU612	1	1	0	0	4	1	0	0	0	0	2	5	0	2	0	5	4	1	0	1	0	3	1	1	0	0	0	32
d__Bacteria	k__norank_d__Bacteria	p__Chloroflexi	c__Anaerolineae	o__SBR1031	f__A4b	g__norank_f__A4b	s__uncultured_bacterium_g__norank_f__A4b	OTU1689	2	4	1	0	3	1	0	0	0	0	2	2	1	2	4	1	1	0	0	0	0	2	2	0	8	1	0	37
d__Bacteria	k__norank_d__Bacteria	p__Chloroflexi	c__Anaerolineae	o__SBR1031	f__A4b	g__norank_f__A4b	s__uncultured_bacterium_g__norank_f__A4b	OTU1674	5	1	2	0	4	0	0	0	0	0	9	6	0	16	8	0	0	2	0	1	0	8	1	1	8	1	0	73
d__Bacteria	k__norank_d__Bacteria	p__Chloroflexi	c__Anaerolineae	o__SBR1031	f__A4b	g__norank_f__A4b	s__uncultured_bacterium_g__norank_f__A4b	OTU3950	2	2	0	0	4	1	0	0	2	0	2	3	1	2	4	2	16	0	0	1	0	0	1	0	0	0	3	46
d__Bacteria	k__norank_d__Bacteria	p__Chloroflexi	c__Anaerolineae	o__SBR1031	f__A4b	g__norank_f__A4b	s__uncultured_bacterium_g__norank_f__A4b	OTU4468	0	4	0	0	5	1	0	0	1	1	2	4	1	3	3	3	5	0	0	2	0	2	1	1	3	0	0	42
d__Bacteria	k__norank_d__Bacteria	p__Chloroflexi	c__Anaerolineae	o__SBR1031	f__A4b	g__norank_f__A4b	s__uncultured_bacterium_g__norank_f__A4b	OTU1959	8	24	1	1	7	2	1	2	4	2	11	3	3	9	13	2	11	0	2	9	0	10	6	8	16	10	8	173
d__Bacteria	k__norank_d__Bacteria	p__Chloroflexi	c__Anaerolineae	o__SBR1031	f__A4b	g__norank_f__A4b	s__uncultured_sludge_bacterium_H8	OTU3781	1	0	0	0	1	0	0	0	3	1	5	2	0	3	6	0	0	0	0	1	0	1	0	2	7	1	1	35
d__Bacteria	k__norank_d__Bacteria	p__Chloroflexi	c__Anaerolineae	o__SBR1031	f__A4b	g__norank_f__A4b	s__unclassified_g__norank_f__A4b	OTU2609	3	1	3	0	0	1	1	0	0	3	1	1	2	2	8	2	0	7	1	0	0	7	1	4	5	1	1	55
d__Bacteria	k__norank_d__Bacteria	p__Chloroflexi	c__Chloroflexia	o__Thermomicrobiales	f__AKYG1722	g__norank_f__AKYG1722	s__uncultured_Chloroflexi_bacterium_g__norank_f__AKYG1722	OTU2964	7	8	6	10	2	5	5	1	0	4	12	12	7	9	11	8	4	5	7	4	1	11	14	6	8	6	2	175
d__Bacteria	k__norank_d__Bacteria	p__Chloroflexi	c__Chloroflexia	o__Thermomicrobiales	f__AKYG1722	g__norank_f__AKYG1722	s__uncultured_soil_bacterium_g__norank_f__AKYG1722	OTU2734	4	1	0	0	0	1	0	0	0	0	1	0	0	4	1	4	6	3	0	1	1	7	1	2	3	0	0	40
d__Bacteria	k__norank_d__Bacteria	p__Chloroflexi	c__Chloroflexia	o__Thermomicrobiales	f__AKYG1722	g__norank_f__AKYG1722	s__uncultured_bacterium_g__norank_f__AKYG1722	OTU3948	4	2	0	1	0	1	0	1	1	0	3	0	3	5	2	2	0	1	1	3	0	1	5	5	1	3	1	46
d__Bacteria	k__norank_d__Bacteria	p__Bacteroidetes	c__Bacteroidia	o__Sphingobacteriales	f__AKYH767	g__norank_f__AKYH767	s__uncultured_bacterium_g__norank_f__AKYH767	OTU40	14	24	10	4	4	11	11	6	8	18	8	8	4	11	17	0	0	11	4	15	8	21	10	5	6	10	9	257
d__Bacteria	k__norank_d__Bacteria	p__Bacteroidetes	c__Bacteroidia	o__Sphingobacteriales	f__AKYH767	g__norank_f__AKYH767	s__unclassified_g__norank_f__AKYH767	OTU1098	10	11	4	0	6	5	0	27	16	10	12	6	2	11	15	1	8	1	2	14	1	7	8	2	4	7	9	199
d__Bacteria	k__norank_d__Bacteria	p__Bacteroidetes	c__Bacteroidia	o__Sphingobacteriales	f__AKYH767	g__norank_f__AKYH767	s__metagenome_g__norank_f__AKYH767	OTU1693	8	2	13	9	0	3	17	2	1	12	2	2	13	4	5	4	0	4	7	2	6	19	4	10	23	2	4	178
d__Bacteria	k__norank_d__Bacteria	p__Bacteroidetes	c__Bacteroidia	o__Sphingobacteriales	f__AKYH767	g__norank_f__AKYH767	s__uncultured_bacterium_g__norank_f__AKYH767	OTU823	8	10	11	4	7	5	3	14	14	9	10	9	4	10	23	0	3	1	4	14	5	6	9	6	13	14	16	232
d__Bacteria	k__norank_d__Bacteria	p__Bacteroidetes	c__Bacteroidia	o__Sphingobacteriales	f__AKYH767	g__norank_f__AKYH767	s__uncultured_Bacteroidetes_bacterium_g__norank_f__AKYH767	OTU1572	9	21	6	3	10	5	2	9	11	2	8	10	1	13	19	0	5	1	5	8	0	4	12	14	11	16	10	215
d__Bacteria	k__norank_d__Bacteria	p__Bacteroidetes	c__Bacteroidia	o__Sphingobacteriales	f__AKYH767	g__norank_f__AKYH767	s__metagenome_g__norank_f__AKYH767	OTU847	8	11	7	1	4	5	3	3	12	3	4	9	7	7	23	1	0	1	3	4	3	5	4	5	8	9	7	157
d__Bacteria	k__norank_d__Bacteria	p__Bacteroidetes	c__Bacteroidia	o__Sphingobacteriales	f__AKYH767	g__norank_f__AKYH767	s__uncultured_bacterium_g__norank_f__AKYH767	OTU14	15	30	27	0	10	21	6	14	24	22	18	10	8	19	28	1	0	5	14	10	3	22	20	21	19	19	13	399
d__Bacteria	k__norank_d__Bacteria	p__Bacteroidetes	c__Bacteroidia	o__Sphingobacteriales	f__AKYH767	g__norank_f__AKYH767	s__metagenome_g__norank_f__AKYH767	OTU4598	3	0	1	2	0	4	3	0	1	5	1	1	2	0	2	0	0	0	3	0	7	7	1	0	4	1	4	52
d__Bacteria	k__norank_d__Bacteria	p__Bacteroidetes	c__Bacteroidia	o__Sphingobacteriales	f__AKYH767	g__norank_f__AKYH767	s__metagenome_g__norank_f__AKYH767	OTU4633	3	7	9	2	4	9	5	8	9	4	3	2	0	8	8	1	1	4	5	6	0	10	2	2	8	17	7	144
d__Bacteria	k__norank_d__Bacteria	p__Bacteroidetes	c__Bacteroidia	o__Sphingobacteriales	f__AKYH767	g__norank_f__AKYH767	s__uncultured_bacterium_g__norank_f__AKYH767	OTU2345	8	18	16	3	4	1	0	9	6	1	6	4	2	8	11	0	2	1	3	5	1	2	6	1	12	14	11	155
d__Bacteria	k__norank_d__Bacteria	p__Bacteroidetes	c__Bacteroidia	o__Sphingobacteriales	f__AKYH767	g__norank_f__AKYH767	s__uncultured_bacterium_g__norank_f__AKYH767	OTU351	48	21	24	3	9	4	21	23	8	11	12	3	10	57	14	42	38	10	8	78	9	44	36	3	191	67	6	800
d__Bacteria	k__norank_d__Bacteria	p__Bacteroidetes	c__Bacteroidia	o__Sphingobacteriales	f__AKYH767	g__norank_f__AKYH767	s__uncultured_bacterium_g__norank_f__AKYH767	OTU3620	5	13	7	2	0	1	4	1	0	2	2	1	17	4	1	1	0	6	1	5	0	4	0	2	9	2	9	99
d__Bacteria	k__norank_d__Bacteria	p__Proteobacteria	c__Alphaproteobacteria	o__Acetobacterales	f__Acetobacteraceae	g__norank_f__Acetobacteraceae	s__metagenome_g__norank_f__Acetobacteraceae	OTU242	12	5	26	4	1	1	20	2	0	9	0	0	8	4	1	3	1	26	4	4	13	13	3	2	14	6	7	189
d__Bacteria	k__norank_d__Bacteria	p__Acidobacteria	c__Acidobacteriia	o__Acidobacteriales	f__Acidobacteriaceae_Subgroup_1	g__norank_f__Acidobacteriaceae_Subgroup_1	s__unclassified_g__norank_f__Acidobacteriaceae_Subgroup_1	OTU3424	6	1	25	4	0	5	8	5	2	2	1	1	3	7	5	0	0	3	11	5	2	7	1	4	6	4	2	120
d__Bacteria	k__norank_d__Bacteria	p__Proteobacteria	c__Alphaproteobacteria	o__Rhizobiales	f__Amb-16S-1323	g__norank_f__Amb-16S-1323	s__uncultured_bacterium_g__norank_f__Amb-16S-1323	OTU1217	3	10	2	3	10	6	1	1	2	1	18	9	2	9	5	5	7	3	0	2	0	3	4	5	5	4	2	122
d__Bacteria	k__norank_d__Bacteria	p__Proteobacteria	c__Alphaproteobacteria	o__Rhizobiales	f__Amb-16S-1323	g__norank_f__Amb-16S-1323	s__uncultured_bacterium_g__norank_f__Amb-16S-1323	OTU1578	46	22	31	9	50	38	12	7	25	17	56	77	28	97	39	16	13	104	28	56	10	94	52	41	93	29	16	1106
d__Bacteria	k__norank_d__Bacteria	p__Chloroflexi	c__Anaerolineae	o__Anaerolineales	f__Anaerolineaceae	g__norank_f__Anaerolineaceae	s__unclassified_g__norank_f__Anaerolineaceae	OTU2393	1	5	0	0	2	0	0	0	0	0	3	3	0	10	0	0	0	0	0	6	0	3	0	0	4	1	1	39
d__Bacteria	k__norank_d__Bacteria	p__Chloroflexi	c__Anaerolineae	o__Anaerolineales	f__Anaerolineaceae	g__norank_f__Anaerolineaceae	s__unclassified_g__norank_f__Anaerolineaceae	OTU496	0	4	0	0	15	0	0	0	3	0	4	4	0	4	1	0	2	0	0	6	0	2	3	0	0	1	0	49
d__Bacteria	k__norank_d__Bacteria	p__Chloroflexi	c__Anaerolineae	o__Anaerolineales	f__Anaerolineaceae	g__norank_f__Anaerolineaceae	s__uncultured_soil_bacterium_g__norank_f__Anaerolineaceae	OTU3216	22	5	0	0	4	0	1	0	1	0	2	4	0	4	1	75	49	0	0	1	1	6	8	2	4	1	2	193
d__Bacteria	k__norank_d__Bacteria	p__Chloroflexi	c__Anaerolineae	o__Anaerolineales	f__Anaerolineaceae	g__norank_f__Anaerolineaceae	s__unclassified_g__norank_f__Anaerolineaceae	OTU2740	6	6	0	0	6	0	0	1	0	1	10	5	0	4	2	1	1	5	0	3	1	24	3	0	8	2	0	89
d__Bacteria	k__norank_d__Bacteria	p__Chloroflexi	c__Anaerolineae	o__Anaerolineales	f__Anaerolineaceae	g__norank_f__Anaerolineaceae	s__unclassified_g__norank_f__Anaerolineaceae	OTU2885	2	6	0	0	5	0	1	0	1	0	2	2	0	4	2	1	5	0	0	1	0	4	0	2	0	1	0	39
d__Bacteria	k__norank_d__Bacteria	p__Chloroflexi	c__Anaerolineae	o__Anaerolineales	f__Anaerolineaceae	g__norank_f__Anaerolineaceae	s__unclassified_g__norank_f__Anaerolineaceae	OTU3163	10	5	1	0	10	1	0	0	2	0	24	15	2	15	5	10	13	3	1	4	0	6	5	7	7	0	0	146
d__Bacteria	k__norank_d__Bacteria	p__Chloroflexi	c__Anaerolineae	o__Anaerolineales	f__Anaerolineaceae	g__norank_f__Anaerolineaceae	s__unclassified_g__norank_f__Anaerolineaceae	OTU2801	8	14	0	0	14	1	0	0	2	2	9	16	3	13	8	25	31	2	1	6	0	9	9	2	15	1	2	193
d__Bacteria	k__norank_d__Bacteria	p__Chloroflexi	c__Anaerolineae	o__Anaerolineales	f__Anaerolineaceae	g__norank_f__Anaerolineaceae	s__unclassified_g__norank_f__Anaerolineaceae	OTU3315	8	24	3	1	13	2	0	2	2	0	8	10	2	7	19	7	9	1	0	9	0	11	4	5	5	1	3	156
d__Bacteria	k__norank_d__Bacteria	p__Chloroflexi	c__Anaerolineae	o__Anaerolineales	f__Anaerolineaceae	g__norank_f__Anaerolineaceae	s__unclassified_g__norank_f__Anaerolineaceae	OTU609	2	0	0	0	5	0	0	0	0	0	6	2	0	4	2	58	19	1	0	1	0	1	2	0	1	0	0	104
d__Bacteria	k__norank_d__Bacteria	p__Chloroflexi	c__Anaerolineae	o__Anaerolineales	f__Anaerolineaceae	g__norank_f__Anaerolineaceae	s__unclassified_g__norank_f__Anaerolineaceae	OTU418	0	19	1	0	4	0	0	2	1	0	10	7	0	3	2	0	0	0	0	8	0	3	5	1	1	2	0	69
d__Bacteria	k__norank_d__Bacteria	p__Chloroflexi	c__Anaerolineae	o__Anaerolineales	f__Anaerolineaceae	g__norank_f__Anaerolineaceae	s__uncultured_soil_bacterium_g__norank_f__Anaerolineaceae	OTU2684	1	1	1	1	0	4	1	1	3	0	0	2	0	1	5	7	1	0	1	1	1	9	3	3	11	3	0	61
d__Bacteria	k__norank_d__Bacteria	p__Chloroflexi	c__Anaerolineae	o__Anaerolineales	f__Anaerolineaceae	g__norank_f__Anaerolineaceae	s__unclassified_g__norank_f__Anaerolineaceae	OTU368	2	4	0	0	5	0	0	1	0	0	7	6	0	4	2	1	0	0	0	1	0	0	0	1	1	2	0	37
d__Bacteria	k__norank_d__Bacteria	p__Chloroflexi	c__Anaerolineae	o__Anaerolineales	f__Anaerolineaceae	g__norank_f__Anaerolineaceae	s__uncultured_soil_bacterium_g__norank_f__Anaerolineaceae	OTU2541	5	1	0	0	1	0	0	0	0	0	2	5	0	1	3	11	16	0	1	0	0	2	1	1	0	0	0	50
d__Bacteria	k__norank_d__Bacteria	p__Chloroflexi	c__Anaerolineae	o__Anaerolineales	f__Anaerolineaceae	g__norank_f__Anaerolineaceae	s__uncultured_Chloroflexi_bacterium_g__norank_f__Anaerolineaceae	OTU1186	3	2	0	1	2	1	0	0	0	0	2	2	0	1	2	47	48	0	0	2	0	0	1	0	0	0	1	115
d__Bacteria	k__norank_d__Bacteria	p__Chloroflexi	c__Anaerolineae	o__Anaerolineales	f__Anaerolineaceae	g__norank_f__Anaerolineaceae	s__unclassified_g__norank_f__Anaerolineaceae	OTU804	10	6	1	0	4	2	0	0	1	1	4	6	2	3	6	11	14	2	2	4	0	1	2	2	3	2	0	89
d__Bacteria	k__norank_d__Bacteria	p__Chloroflexi	c__Anaerolineae	o__Anaerolineales	f__Anaerolineaceae	g__norank_f__Anaerolineaceae	s__unclassified_g__norank_f__Anaerolineaceae	OTU3472	18	38	1	2	15	4	1	0	0	1	16	10	1	10	8	85	48	1	0	3	0	9	18	2	10	3	2	306
d__Bacteria	k__norank_d__Bacteria	p__Chloroflexi	c__Anaerolineae	o__Anaerolineales	f__Anaerolineaceae	g__norank_f__Anaerolineaceae	s__uncultured_soil_bacterium_g__norank_f__Anaerolineaceae	OTU2710	16	37	5	1	12	3	2	1	2	0	17	11	2	31	12	14	25	10	0	5	3	26	13	5	33	5	1	292
d__Bacteria	k__norank_d__Bacteria	p__Chloroflexi	c__Anaerolineae	o__Anaerolineales	f__Anaerolineaceae	g__norank_f__Anaerolineaceae	s__unclassified_g__norank_f__Anaerolineaceae	OTU3388	3	6	0	0	7	0	0	0	0	0	1	4	0	6	3	12	6	1	1	3	0	2	1	2	3	0	1	62
d__Bacteria	k__norank_d__Bacteria	p__Chloroflexi	c__Anaerolineae	o__Anaerolineales	f__Anaerolineaceae	g__norank_f__Anaerolineaceae	s__unclassified_g__norank_f__Anaerolineaceae	OTU3212	7	39	0	0	24	0	0	2	1	0	35	8	1	10	4	0	2	1	0	11	0	4	5	7	5	2	0	168
d__Bacteria	k__norank_d__Bacteria	p__Chloroflexi	c__Anaerolineae	o__Anaerolineales	f__Anaerolineaceae	g__norank_f__Anaerolineaceae	s__uncultured_soil_bacterium_g__norank_f__Anaerolineaceae	OTU3183	3	2	0	1	9	0	0	1	3	0	5	3	0	6	3	2	5	0	0	6	0	2	4	2	5	5	0	67
d__Bacteria	k__norank_d__Bacteria	p__Chloroflexi	c__Anaerolineae	o__Anaerolineales	f__Anaerolineaceae	g__norank_f__Anaerolineaceae	s__uncultured_Anaerolineaceae_bacterium_g__norank_f__Anaerolineaceae	OTU4606	3	3	4	1	3	0	0	0	1	1	4	5	0	0	1	47	15	3	0	1	0	3	1	0	1	0	4	101
d__Bacteria	k__norank_d__Bacteria	p__Chloroflexi	c__Anaerolineae	o__Anaerolineales	f__Anaerolineaceae	g__norank_f__Anaerolineaceae	s__unclassified_g__norank_f__Anaerolineaceae	OTU1707	8	0	0	0	0	0	0	0	0	0	0	0	0	0	0	10	55	0	0	0	0	0	0	0	0	0	0	73
d__Bacteria	k__norank_d__Bacteria	p__Chloroflexi	c__Anaerolineae	o__Anaerolineales	f__Anaerolineaceae	g__norank_f__Anaerolineaceae	s__uncultured_Chloroflexi_bacterium_g__norank_f__Anaerolineaceae	OTU555	3	4	0	0	1	0	1	0	0	0	3	1	1	0	0	1	2	3	0	3	0	3	1	3	10	0	0	40
d__Bacteria	k__norank_d__Bacteria	p__Proteobacteria	c__Gammaproteobacteria	o__Betaproteobacteriales	f__B1-7BS	g__norank_f__B1-7BS	s__unclassified_g__norank_f__B1-7BS	OTU495	79	52	57	12	52	71	11	19	52	35	46	44	15	55	83	194	391	26	25	29	10	41	47	35	37	28	59	1605
d__Bacteria	k__norank_d__Bacteria	p__Proteobacteria	c__Gammaproteobacteria	o__Betaproteobacteriales	f__B1-7BS	g__norank_f__B1-7BS	s__unclassified_g__norank_f__B1-7BS	OTU3716	13	15	20	6	10	27	9	11	20	13	5	9	11	17	27	10	11	13	19	11	6	14	12	4	9	14	33	369
d__Bacteria	k__norank_d__Bacteria	p__Proteobacteria	c__Gammaproteobacteria	o__Betaproteobacteriales	f__B1-7BS	g__norank_f__B1-7BS	s__uncultured_bacterium_g__norank_f__B1-7BS	OTU2543	14	16	3	6	10	9	1	7	11	3	19	17	4	13	16	0	5	4	3	16	5	4	17	5	4	23	15	250
d__Bacteria	k__norank_d__Bacteria	p__Proteobacteria	c__Deltaproteobacteria	o__Myxococcales	f__BIrii41	g__norank_f__BIrii41	s__metagenome_g__norank_f__BIrii41	OTU3190	26	101	32	8	8	6	9	22	10	29	11	9	4	11	8	6	5	11	3	14	6	13	12	9	15	18	8	414
d__Bacteria	k__norank_d__Bacteria	p__Proteobacteria	c__Deltaproteobacteria	o__Myxococcales	f__BIrii41	g__norank_f__BIrii41	s__unclassified_g__norank_f__BIrii41	OTU742	6	12	2	0	2	0	3	1	1	1	3	1	0	1	5	0	0	0	0	2	1	4	3	0	10	1	1	60
d__Bacteria	k__norank_d__Bacteria	p__Proteobacteria	c__Deltaproteobacteria	o__Myxococcales	f__BIrii41	g__norank_f__BIrii41	s__unclassified_g__norank_f__BIrii41	OTU3150	3	8	7	3	2	2	4	3	0	5	8	3	3	9	5	2	1	2	1	4	3	4	6	2	5	12	1	108
d__Bacteria	k__norank_d__Bacteria	p__Proteobacteria	c__Deltaproteobacteria	o__Myxococcales	f__BIrii41	g__norank_f__BIrii41	s__uncultured_bacterium_g__norank_f__BIrii41	OTU293	4	4	2	1	1	0	0	2	0	2	1	1	2	0	2	2	3	1	1	0	4	3	1	0	2	0	0	39
d__Bacteria	k__norank_d__Bacteria	p__Proteobacteria	c__Deltaproteobacteria	o__Myxococcales	f__BIrii41	g__norank_f__BIrii41	s__uncultured_bacterium_g__norank_f__BIrii41	OTU388	4	11	2	0	2	0	0	2	1	0	6	7	1	2	4	1	4	0	0	2	0	1	0	1	0	1	0	52
d__Bacteria	k__norank_d__Bacteria	p__Proteobacteria	c__Deltaproteobacteria	o__Myxococcales	f__BIrii41	g__norank_f__BIrii41	s__uncultured_bacterium_g__norank_f__BIrii41	OTU3963	18	68	16	5	8	6	3	6	9	13	12	9	7	27	6	4	10	3	1	10	2	11	14	4	8	7	12	299
d__Bacteria	k__norank_d__Bacteria	p__Proteobacteria	c__Deltaproteobacteria	o__Myxococcales	f__BIrii41	g__norank_f__BIrii41	s__metagenome_g__norank_f__BIrii41	OTU2670	2	14	5	1	3	1	1	0	3	3	0	4	1	2	5	1	2	2	1	2	2	8	3	3	4	0	5	78
d__Bacteria	k__norank_d__Bacteria	p__Proteobacteria	c__Deltaproteobacteria	o__Myxococcales	f__BIrii41	g__norank_f__BIrii41	s__metagenome_g__norank_f__BIrii41	OTU699	1	2	0	0	1	4	0	5	11	1	2	6	0	3	7	0	0	4	3	3	1	1	4	1	1	2	1	64
d__Bacteria	k__norank_d__Bacteria	p__Proteobacteria	c__Deltaproteobacteria	o__Myxococcales	f__BIrii41	g__norank_f__BIrii41	s__uncultured_delta_proteobacterium_g__norank_f__BIrii41	OTU1510	11	11	8	4	4	9	5	4	9	7	15	5	6	15	11	3	2	5	14	5	2	6	4	3	7	7	5	187
d__Bacteria	k__norank_d__Bacteria	p__Proteobacteria	c__Deltaproteobacteria	o__Myxococcales	f__BIrii41	g__norank_f__BIrii41	s__unclassified_g__norank_f__BIrii41	OTU3097	3	13	3	2	5	0	0	2	2	2	3	2	0	1	4	23	12	4	0	3	0	1	7	0	1	4	4	101
d__Bacteria	k__norank_d__Bacteria	p__Proteobacteria	c__Deltaproteobacteria	o__Myxococcales	f__BIrii41	g__norank_f__BIrii41	s__uncultured_bacterium_g__norank_f__BIrii41	OTU3185	13	11	9	0	3	0	4	2	3	0	3	1	2	5	1	4	1	1	0	4	1	1	5	4	0	1	1	80
d__Bacteria	k__norank_d__Bacteria	p__Proteobacteria	c__Deltaproteobacteria	o__Myxococcales	f__BIrii41	g__norank_f__BIrii41	s__uncultured_bacterium_g__norank_f__BIrii41	OTU3063	0	0	1	3	2	1	0	0	1	0	3	0	0	3	1	0	0	0	1	2	0	0	8	2	7	8	3	46
d__Bacteria	k__norank_d__Bacteria	p__Proteobacteria	c__Deltaproteobacteria	o__Myxococcales	f__BIrii41	g__norank_f__BIrii41	s__unclassified_g__norank_f__BIrii41	OTU2324	1	10	0	0	2	0	0	1	1	0	2	1	0	1	0	0	0	0	0	4	0	0	2	0	0	5	0	30
d__Bacteria	k__norank_d__Bacteria	p__Proteobacteria	c__Deltaproteobacteria	o__Myxococcales	f__BIrii41	g__norank_f__BIrii41	s__uncultured_Sorangiineae_bacterium_g__norank	OTU3036	6	7	4	1	0	5	2	4	0	6	1	0	0	1	2	3	3	6	4	8	3	7	4	1	1	1	5	85
d__Bacteria	k__norank_d__Bacteria	p__Bacteroidetes	c__Ignavibacteria	o__Kryptoniales	f__BSV26	g__norank_f__BSV26	s__unclassified_g__norank_f__BSV26	OTU8	9	4	28	1	1	0	3	1	0	5	2	0	3	1	0	2	0	6	1	5	1	2	1	0	11	6	1	94
d__Bacteria	k__norank_d__Bacteria	p__Bacteroidetes	c__Ignavibacteria	o__Kryptoniales	f__BSV26	g__norank_f__BSV26	s__unclassified_g__norank_f__BSV26	OTU1280	39	31	52	5	6	3	9	3	5	14	12	0	7	24	2	3	2	21	4	10	2	13	4	8	18	16	22	335
d__Bacteria	k__norank_d__Bacteria	p__Bacteroidetes	c__Ignavibacteria	o__Kryptoniales	f__BSV26	g__norank_f__BSV26	s__uncultured_soil_bacterium_g__norank_f__BSV26	OTU843	39	15	4	5	14	2	0	32	38	13	11	3	1	25	3	31	76	0	0	13	2	4	10	2	2	9	13	367
d__Bacteria	k__norank_d__Bacteria	p__Bacteroidetes	c__Ignavibacteria	o__Kryptoniales	f__BSV26	g__norank_f__BSV26	s__unclassified_g__norank_f__BSV26	OTU1359	11	29	3	0	5	0	0	2	3	0	8	2	0	4	2	2	2	0	0	10	0	3	2	3	1	0	0	92
d__Bacteria	k__norank_d__Bacteria	p__Bacteroidetes	c__Ignavibacteria	o__Kryptoniales	f__BSV26	g__norank_f__BSV26	s__uncultured_bacterium_g__norank_f__BSV26	OTU2346	6	9	8	0	0	1	0	1	1	3	2	0	0	1	1	14	30	2	0	7	2	1	1	1	4	4	0	99
d__Bacteria	k__norank_d__Bacteria	p__Dependentiae	c__Babeliae	o__Babeliales	f__Babeliaceae	g__norank_f__Babeliaceae	s__uncultured_bacterium_g__norank_f__Babeliaceae	OTU3449	2	1	4	2	0	0	3	0	0	4	0	2	2	5	2	5	1	5	2	1	0	7	0	4	6	1	2	61
d__Bacteria	k__norank_d__Bacteria	p__Acidobacteria	c__Blastocatellia_Subgroup_4	o__Blastocatellales	f__Blastocatellaceae	g__norank_f__Blastocatellaceae	s__uncultured_Acidobacteria_bacterium_g__norank_f__Blastocatellaceae	OTU3588	4	6	1	0	3	6	2	1	3	2	7	14	2	8	8	1	4	10	0	5	3	16	0	4	13	3	2	128
d__Bacteria	k__norank_d__Bacteria	p__Acidobacteria	c__Blastocatellia_Subgroup_4	o__Blastocatellales	f__Blastocatellaceae	g__norank_f__Blastocatellaceae	s__unclassified_g__norank_f__Blastocatellaceae	OTU3272	5	3	7	3	0	6	8	1	1	1	6	9	2	4	8	2	1	25	9	8	6	45	6	5	27	4	11	213
d__Bacteria	k__norank_d__Bacteria	p__Acidobacteria	c__Blastocatellia_Subgroup_4	o__Blastocatellales	f__Blastocatellaceae	g__norank_f__Blastocatellaceae	s__unclassified_g__norank_f__Blastocatellaceae	OTU3043	20	11	19	5	12	9	6	9	9	4	34	29	2	44	16	21	6	41	8	44	12	40	28	17	60	36	10	552
d__Bacteria	k__norank_d__Bacteria	p__Acidobacteria	c__Blastocatellia_Subgroup_4	o__Blastocatellales	f__Blastocatellaceae	g__norank_f__Blastocatellaceae	s__unclassified_g__norank_f__Blastocatellaceae	OTU3000	12	3	4	2	9	5	5	2	8	4	21	52	4	30	16	2	2	17	9	23	4	27	12	7	19	18	2	319
d__Bacteria	k__norank_d__Bacteria	p__Acidobacteria	c__Blastocatellia_Subgroup_4	o__Blastocatellales	f__Blastocatellaceae	g__norank_f__Blastocatellaceae	s__unclassified_g__norank_f__Blastocatellaceae	OTU3336	0	0	0	1	0	5	1	0	2	0	0	2	0	0	0	0	0	4	3	1	2	10	0	3	5	0	3	42
d__Bacteria	k__norank_d__Bacteria	p__Proteobacteria	c__Deltaproteobacteria	o__Myxococcales	f__Blfdi19	g__norank_f__Blfdi19	s__metagenome_g__norank_f__Blfdi19	OTU3281	1	0	1	0	0	1	0	4	14	1	3	5	0	3	3	0	0	0	0	0	0	1	0	2	2	1	1	43
d__Bacteria	k__norank_d__Bacteria	p__Proteobacteria	c__Gammaproteobacteria	o__Betaproteobacteriales	f__Burkholderiaceae	g__norank_f__Burkholderiaceae	s__Burkholderiales_bacterium_X4	OTU4334	10	11	8	1	12	6	1	1	15	7	18	8	1	22	17	26	12	9	3	6	5	13	2	14	4	9	4	245
d__Bacteria	k__norank_d__Bacteria	p__Planctomycetes	c__Phycisphaerae	o__Tepidisphaerales	f__CPla-3_termite_group	g__norank_f__CPla-3_termite_group	s__metagenome_g__norank_f__CPla-3_termite_group	OTU2798	4	3	4	1	1	1	5	2	1	2	0	0	3	0	5	1	0	8	2	0	5	4	1	1	9	4	2	69
d__Bacteria	k__norank_d__Bacteria	p__Chloroflexi	c__Anaerolineae	o__Caldilineales	f__Caldilineaceae	g__norank_f__Caldilineaceae	s__unclassified_g__norank_f__Caldilineaceae	OTU2576	1	3	2	1	4	5	0	1	1	3	7	1	8	11	3	5	1	4	1	2	3	7	2	3	2	2	3	86
d__Bacteria	k__norank_d__Bacteria	p__Chloroflexi	c__Anaerolineae	o__Caldilineales	f__Caldilineaceae	g__norank_f__Caldilineaceae	s__uncultured_soil_bacterium_g__norank_f__Caldilineaceae	OTU556	3	4	1	1	5	6	1	1	1	1	13	11	0	1	4	1	0	0	3	6	0	1	11	8	1	5	0	89
d__Bacteria	k__norank_d__Bacteria	p__Chloroflexi	c__Anaerolineae	o__Caldilineales	f__Caldilineaceae	g__norank_f__Caldilineaceae	s__uncultured_bacterium_g__norank_f__Caldilineaceae	OTU2975	4	3	0	0	3	2	0	1	6	0	6	5	1	2	8	1	0	1	1	5	0	0	5	1	0	3	0	58
d__Bacteria	k__norank_d__Bacteria	p__Chloroflexi	c__Anaerolineae	o__Caldilineales	f__Caldilineaceae	g__norank_f__Caldilineaceae	s__metagenome_g__norank_f__Caldilineaceae	OTU3415	6	8	2	0	6	4	0	1	1	1	12	4	4	4	11	1	2	2	2	3	0	4	6	4	7	1	2	98
d__Bacteria	k__norank_d__Bacteria	p__Chloroflexi	c__Anaerolineae	o__Caldilineales	f__Caldilineaceae	g__norank_f__Caldilineaceae	s__uncultured_bacterium_g__norank_f__Caldilineaceae	OTU517	2	3	2	0	3	1	1	1	4	1	4	6	1	0	5	0	4	0	0	2	1	0	1	3	3	6	2	56
d__Bacteria	k__norank_d__Bacteria	p__Proteobacteria	c__Gammaproteobacteria	o__Cellvibrionales	f__Cellvibrionaceae	g__norank_f__Cellvibrionaceae	s__metagenome_g__norank_f__Cellvibrionaceae	OTU158	0	0	0	0	0	0	2	4	2	17	7	7	0	0	1	0	0	1	7	4	0	2	16	11	0	0	1	82
d__Bacteria	k__norank_d__Bacteria	p__Bacteroidetes	c__Bacteroidia	o__Chitinophagales	f__Chitinophagaceae	g__norank_f__Chitinophagaceae	s__uncultured_marine_bacterium_g__norank_f__Chitinophagaceae	OTU619	1	5	1	16	10	4	7	5	8	4	6	3	0	4	7	9	1	1	6	12	1	2	10	9	1	6	1	140
d__Bacteria	k__norank_d__Bacteria	p__Bacteroidetes	c__Bacteroidia	o__Chitinophagales	f__Chitinophagaceae	g__norank_f__Chitinophagaceae	s__metagenome_g__norank_f__Chitinophagaceae	OTU755	0	1	1	0	1	2	1	3	1	2	0	1	0	0	1	0	1	10	5	3	5	2	4	3	1	1	0	49
d__Bacteria	k__norank_d__Bacteria	p__Bacteroidetes	c__Bacteroidia	o__Chitinophagales	f__Chitinophagaceae	g__norank_f__Chitinophagaceae	s__unclassified_g__norank_f__Chitinophagaceae	OTU4533	5	9	12	24	3	8	33	36	6	23	3	9	53	9	5	1	1	11	29	14	19	13	17	21	3	23	27	417
d__Bacteria	k__norank_d__Bacteria	p__Bacteroidetes	c__Bacteroidia	o__Chitinophagales	f__Chitinophagaceae	g__norank_f__Chitinophagaceae	s__uncultured_Ferruginibacter_sp._g__norank	OTU4516	5	0	40	21	1	7	134	4	3	27	2	3	47	4	2	3	11	110	86	2	108	49	4	23	32	5	19	752
d__Bacteria	k__norank_d__Bacteria	p__Bacteroidetes	c__Bacteroidia	o__Chitinophagales	f__Chitinophagaceae	g__norank_f__Chitinophagaceae	s__unclassified_g__norank_f__Chitinophagaceae	OTU128	0	0	0	0	3	1	4	3	6	1	6	3	1	4	14	1	0	24	18	0	3	8	2	2	3	1	1	109
d__Bacteria	k__norank_d__Bacteria	p__Bacteroidetes	c__Bacteroidia	o__Chitinophagales	f__Chitinophagaceae	g__norank_f__Chitinophagaceae	s__uncultured_soil_bacterium_g__norank_f__Chitinophagaceae	OTU1157	2	4	2	0	3	1	2	2	0	5	2	2	1	6	8	1	0	2	1	2	4	1	2	1	1	0	6	61
d__Bacteria	k__norank_d__Bacteria	p__Bacteroidetes	c__Bacteroidia	o__Chitinophagales	f__Chitinophagaceae	g__norank_f__Chitinophagaceae	s__metagenome_g__norank_f__Chitinophagaceae	OTU833	0	0	0	6	5	5	8	6	4	2	6	1	1	2	9	1	1	8	17	9	3	11	5	4	1	3	0	118
d__Bacteria	k__norank_d__Bacteria	p__Bacteroidetes	c__Bacteroidia	o__Chitinophagales	f__Chitinophagaceae	g__norank_f__Chitinophagaceae	s__unclassified_g__norank_f__Chitinophagaceae	OTU4501	7	5	6	3	9	17	2	4	29	6	13	6	3	4	4	0	3	4	13	5	4	11	6	11	10	7	8	200
d__Bacteria	k__norank_d__Bacteria	p__Bacteroidetes	c__Bacteroidia	o__Chitinophagales	f__Chitinophagaceae	g__norank_f__Chitinophagaceae	s__unclassified_g__norank_f__Chitinophagaceae	OTU2332	5	0	3	10	2	11	19	4	1	18	1	3	4	3	2	2	0	5	25	4	9	2	5	3	4	7	6	158
d__Bacteria	k__norank_d__Bacteria	p__Bacteroidetes	c__Bacteroidia	o__Chitinophagales	f__Chitinophagaceae	g__norank_f__Chitinophagaceae	s__unclassified_g__norank_f__Chitinophagaceae	OTU621	2	3	27	33	3	32	25	19	17	28	1	19	23	5	6	6	1	36	23	26	29	23	4	9	12	7	16	435
d__Bacteria	k__norank_d__Bacteria	p__Bacteroidetes	c__Bacteroidia	o__Chitinophagales	f__Chitinophagaceae	g__norank_f__Chitinophagaceae	s__uncultured_bacterium_g__norank_f__Chitinophagaceae	OTU4588	12	1	10	4	0	12	62	8	1	18	0	0	33	0	1	1	2	13	6	1	155	2	0	5	2	1	159	509
d__Bacteria	k__norank_d__Bacteria	p__Bacteroidetes	c__Bacteroidia	o__Chitinophagales	f__Chitinophagaceae	g__norank_f__Chitinophagaceae	s__metagenome_g__norank_f__Chitinophagaceae	OTU1821	4	2	2	7	1	0	1	3	2	4	0	0	0	2	0	1	0	0	0	3	0	2	5	5	5	2	4	55
d__Bacteria	k__norank_d__Bacteria	p__Bacteroidetes	c__Bacteroidia	o__Chitinophagales	f__Chitinophagaceae	g__norank_f__Chitinophagaceae	s__unclassified_g__norank_f__Chitinophagaceae	OTU2302	1	0	0	2	0	7	6	2	0	3	1	0	1	0	0	0	0	5	2	2	2	4	0	0	0	0	0	38
d__Bacteria	k__norank_d__Bacteria	p__Bacteroidetes	c__Bacteroidia	o__Chitinophagales	f__Chitinophagaceae	g__norank_f__Chitinophagaceae	s__unclassified_g__norank_f__Chitinophagaceae	OTU1507	0	1	2	13	1	6	14	8	7	9	7	1	3	1	2	1	1	2	6	2	2	1	5	7	2	6	2	112
d__Bacteria	k__norank_d__Bacteria	p__Bacteroidetes	c__Bacteroidia	o__Chitinophagales	f__Chitinophagaceae	g__norank_f__Chitinophagaceae	s__unclassified_g__norank_f__Chitinophagaceae	OTU243	2	1	0	1	3	6	0	6	22	0	8	17	0	3	24	0	0	0	6	0	12	6	2	4	3	4	2	132
d__Bacteria	k__norank_d__Bacteria	p__Bacteroidetes	c__Bacteroidia	o__Chitinophagales	f__Chitinophagaceae	g__norank_f__Chitinophagaceae	s__unclassified_g__norank_f__Chitinophagaceae	OTU830	33	20	45	29	14	34	72	50	64	93	26	44	64	69	74	22	3	41	50	56	52	46	60	76	69	101	57	1364
d__Bacteria	k__norank_d__Bacteria	p__Bacteroidetes	c__Bacteroidia	o__Chitinophagales	f__Chitinophagaceae	g__norank_f__Chitinophagaceae	s__uncultured_Sphingobacteriales_bacterium_g__norank_f__Chitinophagaceae	OTU35	54	23	90	37	27	99	274	118	31	123	13	29	188	26	10	11	14	98	110	75	503	43	31	90	17	61	195	2390
d__Bacteria	k__norank_d__Bacteria	p__Bacteroidetes	c__Bacteroidia	o__Chitinophagales	f__Chitinophagaceae	g__norank_f__Chitinophagaceae	s__uncultured_Sphingobacteriales_bacterium_g__norank_f__Chitinophagaceae	OTU2522	312	143	394	210	89	451	853	522	172	332	55	297	481	126	64	103	42	465	472	466	1366	121	122	243	68	346	733	9048
d__Bacteria	k__norank_d__Bacteria	p__Bacteroidetes	c__Bacteroidia	o__Chitinophagales	f__Chitinophagaceae	g__norank_f__Chitinophagaceae	s__unclassified_g__norank_f__Chitinophagaceae	OTU1574	0	0	0	6	1	7	2	17	3	3	3	2	2	1	0	0	0	5	5	3	2	4	1	1	1	1	3	73
d__Bacteria	k__norank_d__Bacteria	p__Bacteroidetes	c__Bacteroidia	o__Chitinophagales	f__Chitinophagaceae	g__norank_f__Chitinophagaceae	s__metagenome_g__norank_f__Chitinophagaceae	OTU1457	0	0	0	0	0	8	5	1	2	1	0	2	1	0	0	1	0	3	15	1	0	4	2	1	0	3	0	50
d__Bacteria	k__norank_d__Bacteria	p__Bacteroidetes	c__Bacteroidia	o__Chitinophagales	f__Chitinophagaceae	g__norank_f__Chitinophagaceae	s__uncultured_Terrimonas_sp._g__norank	OTU2358	5	7	7	42	14	6	11	20	30	28	17	44	20	21	33	15	1	9	23	16	15	45	59	28	13	31	18	578
d__Bacteria	k__norank_d__Bacteria	p__Bacteroidetes	c__Bacteroidia	o__Flavobacteriales	f__Cryomorphaceae	g__norank_f__Cryomorphaceae	s__uncultured_bacterium_g__norank_f__Cryomorphaceae	OTU1409	4	2	11	10	3	12	1	1	1	5	11	3	9	0	0	2	0	0	8	3	4	1	3	14	1	0	29	138
d__Bacteria	k__norank_d__Bacteria	p__Bacteroidetes	c__Bacteroidia	o__Flavobacteriales	f__Cryomorphaceae	g__norank_f__Cryomorphaceae	s__unclassified_g__norank_f__Cryomorphaceae	OTU2338	7	18	8	2	1	1	1	9	6	5	7	4	1	37	3	1	0	1	1	27	0	0	17	5	6	123	47	338
d__Bacteria	k__norank_d__Bacteria	p__Bacteroidetes	c__Bacteroidia	o__Cytophagales	f__Cyclobacteriaceae	g__norank_f__Cyclobacteriaceae	s__uncultured_Bacteroidetes_bacterium_g__norank_f__Cyclobacteriaceae	OTU1127	21	49	23	24	23	14	11	33	111	18	44	39	6	31	271	14	12	4	22	25	2	41	19	51	69	120	38	1135
d__Bacteria	k__norank_d__Bacteria	p__Bacteroidetes	c__Bacteroidia	o__Cytophagales	f__Cyclobacteriaceae	g__norank_f__Cyclobacteriaceae	s__uncultured_Bacteroidetes_bacterium_g__norank_f__Cyclobacteriaceae	OTU3263	1	6	5	0	2	1	0	9	14	0	2	1	0	2	5	0	6	0	1	8	0	0	2	1	0	7	2	75
d__Bacteria	k__norank_d__Bacteria	p__Bacteroidetes	c__Bacteroidia	o__Cytophagales	f__Cyclobacteriaceae	g__norank_f__Cyclobacteriaceae	s__uncultured_Bacteroidetes_bacterium_g__norank_f__Cyclobacteriaceae	OTU1097	7	10	9	0	1	2	0	7	11	5	1	1	1	3	2	23	80	0	0	11	0	6	8	6	2	6	1	203
d__Bacteria	k__norank_d__Bacteria	p__Proteobacteria	c__Alphaproteobacteria	o__Rhizobiales	f__D05-2	g__norank_f__D05-2	s__uncultured_Bradyrhizobiaceae_bacterium_g__norank	OTU446	11	4	5	0	6	2	1	0	0	0	2	11	3	4	0	5	0	12	3	3	3	3	1	6	4	2	0	91
d__Bacteria	k__norank_d__Bacteria	p__Proteobacteria	c__Deltaproteobacteria	o__Desulfarculales	f__Desulfarculaceae	g__norank_f__Desulfarculaceae	s__unclassified_g__norank_f__Desulfarculaceae	OTU3021	23	30	22	4	16	10	12	3	4	8	28	25	13	42	17	15	12	13	8	21	9	44	14	10	56	12	19	490
d__Bacteria	k__norank_d__Bacteria	p__Proteobacteria	c__Deltaproteobacteria	o__Desulfarculales	f__Desulfarculaceae	g__norank_f__Desulfarculaceae	s__unclassified_g__norank_f__Desulfarculaceae	OTU3112	3	5	4	0	1	2	0	1	2	1	2	2	0	3	0	3	9	3	0	1	1	4	2	3	2	0	1	55
d__Bacteria	k__norank_d__Bacteria	p__Proteobacteria	c__Deltaproteobacteria	o__Desulfarculales	f__Desulfarculaceae	g__norank_f__Desulfarculaceae	s__metagenome_g__norank_f__Desulfarculaceae	OTU1948	11	1	3	1	4	3	0	1	1	1	4	2	1	3	4	23	23	8	2	3	1	4	0	2	7	1	5	119
d__Bacteria	k__norank_d__Bacteria	p__Proteobacteria	c__Deltaproteobacteria	o__Desulfarculales	f__Desulfarculaceae	g__norank_f__Desulfarculaceae	s__unclassified_g__norank_f__Desulfarculaceae	OTU2716	16	16	9	0	19	4	1	1	2	4	10	11	6	21	11	48	33	20	1	2	0	18	2	5	22	4	9	295
d__Bacteria	k__norank_d__Bacteria	p__Proteobacteria	c__Deltaproteobacteria	o__Desulfarculales	f__Desulfarculaceae	g__norank_f__Desulfarculaceae	s__unclassified_g__norank_f__Desulfarculaceae	OTU2818	0	1	0	0	3	0	0	0	0	0	2	3	0	2	2	6	2	2	1	0	0	5	1	0	5	0	0	35
d__Bacteria	k__norank_d__Bacteria	p__Proteobacteria	c__Deltaproteobacteria	o__Desulfarculales	f__Desulfarculaceae	g__norank_f__Desulfarculaceae	s__unclassified_g__norank_f__Desulfarculaceae	OTU1286	1	1	3	1	5	2	0	0	1	1	4	0	2	5	1	3	9	2	1	1	1	5	0	0	1	1	2	53
d__Bacteria	k__norank_d__Bacteria	p__Proteobacteria	c__Deltaproteobacteria	o__Desulfarculales	f__Desulfarculaceae	g__norank_f__Desulfarculaceae	s__uncultured_Desulfuromonadales_bacterium_g__norank_f__Desulfarculaceae	OTU2860	3	6	5	2	2	0	4	1	4	1	7	7	4	4	2	2	8	2	2	5	1	7	7	1	6	0	3	96
d__Bacteria	k__norank_d__Bacteria	p__Proteobacteria	c__Deltaproteobacteria	o__Desulfarculales	f__Desulfarculaceae	g__norank_f__Desulfarculaceae	s__metagenome_g__norank_f__Desulfarculaceae	OTU1247	5	6	4	1	2	6	0	0	0	7	1	3	7	3	6	1	11	7	1	3	3	9	2	1	15	4	4	112
d__Bacteria	k__norank_d__Bacteria	p__Proteobacteria	c__Deltaproteobacteria	o__Desulfarculales	f__Desulfarculaceae	g__norank_f__Desulfarculaceae	s__uncultured_delta_proteobacterium_g__norank_f__Desulfarculaceae	OTU571	0	3	0	0	8	1	0	0	2	0	8	1	0	7	3	1	1	2	1	4	0	0	1	0	4	1	1	49
d__Bacteria	k__norank_d__Bacteria	p__Proteobacteria	c__Gammaproteobacteria	o__Diplorickettsiales	f__Diplorickettsiaceae	g__norank_f__Diplorickettsiaceae	s__uncultured_Coxiellaceae_bacterium_g__norank_f__Diplorickettsiaceae	OTU2415	7	7	1	0	0	0	0	0	0	0	1	0	4	3	0	0	0	0	0	5	0	0	3	0	3	0	0	34
d__Bacteria	k__norank_d__Bacteria	p__Proteobacteria	c__Gammaproteobacteria	o__Diplorickettsiales	f__Diplorickettsiaceae	g__norank_f__Diplorickettsiaceae	s__uncultured_bacterium_g__norank_f__Diplorickettsiaceae	OTU1223	3	4	0	1	2	0	1	4	1	1	4	2	4	3	1	1	2	3	0	1	3	1	2	1	4	3	1	53
d__Bacteria	k__norank_d__Bacteria	p__Proteobacteria	c__Gammaproteobacteria	o__Diplorickettsiales	f__Diplorickettsiaceae	g__norank_f__Diplorickettsiaceae	s__unclassified_g__norank_f__Diplorickettsiaceae	OTU2557	2	0	1	0	0	0	0	0	0	0	5	0	0	2	2	0	0	0	0	1	0	2	1	2	8	2	0	28
d__Bacteria	k__norank_d__Bacteria	p__Proteobacteria	c__Gammaproteobacteria	o__Diplorickettsiales	f__Diplorickettsiaceae	g__norank_f__Diplorickettsiaceae	s__uncultured_bacterium_g__norank_f__Diplorickettsiaceae	OTU2738	14	8	16	3	2	0	0	0	0	2	4	6	1	8	1	1	2	7	1	5	1	8	3	7	13	3	3	119
d__Bacteria	k__norank_d__Bacteria	p__Proteobacteria	c__Gammaproteobacteria	o__Diplorickettsiales	f__Diplorickettsiaceae	g__norank_f__Diplorickettsiaceae	s__unclassified_g__norank_f__Diplorickettsiaceae	OTU1351	2	3	2	0	1	0	0	0	0	0	8	0	2	20	0	1	0	0	1	1	1	1	2	0	25	1	2	73
d__Bacteria	k__norank_d__Bacteria	p__Proteobacteria	c__Gammaproteobacteria	o__Diplorickettsiales	f__Diplorickettsiaceae	g__norank_f__Diplorickettsiaceae	s__unclassified_g__norank_f__Diplorickettsiaceae	OTU4031	3	10	4	1	4	5	1	2	0	1	6	4	3	13	4	1	1	5	4	2	0	8	7	5	5	3	4	106
d__Bacteria	k__norank_d__Bacteria	p__Proteobacteria	c__Gammaproteobacteria	o__Diplorickettsiales	f__Diplorickettsiaceae	g__norank_f__Diplorickettsiaceae	s__unclassified_g__norank_f__Diplorickettsiaceae	OTU3195	7	22	4	0	2	1	1	3	2	4	8	4	2	6	6	1	0	2	0	2	0	8	5	0	12	3	1	106
d__Bacteria	k__norank_d__Bacteria	p__Proteobacteria	c__Gammaproteobacteria	o__Diplorickettsiales	f__Diplorickettsiaceae	g__norank_f__Diplorickettsiaceae	s__unclassified_g__norank_f__Diplorickettsiaceae	OTU2498	0	0	0	0	0	1	2	0	0	0	0	0	5	1	1	0	0	2	1	1	2	12	0	2	1	0	2	33
d__Bacteria	k__norank_d__Bacteria	p__Proteobacteria	c__Gammaproteobacteria	o__Diplorickettsiales	f__Diplorickettsiaceae	g__norank_f__Diplorickettsiaceae	s__uncultured_Coxiellaceae_bacterium_g__norank_f__Diplorickettsiaceae	OTU3798	19	58	20	4	7	3	3	5	2	2	3	8	4	5	19	0	0	14	3	7	3	7	11	1	11	10	8	237
d__Bacteria	k__norank_d__Bacteria	p__Proteobacteria	c__Gammaproteobacteria	o__Diplorickettsiales	f__Diplorickettsiaceae	g__norank_f__Diplorickettsiaceae	s__gamma_proteobacterium_WY1	OTU1322	9	7	4	0	4	0	1	1	0	4	0	2	2	5	4	0	1	0	0	1	1	0	1	5	3	3	5	63
d__Bacteria	k__norank_d__Bacteria	p__Proteobacteria	c__Gammaproteobacteria	o__Diplorickettsiales	f__Diplorickettsiaceae	g__norank_f__Diplorickettsiaceae	s__unclassified_g__norank_f__Diplorickettsiaceae	OTU1420	8	2	4	0	4	1	1	1	2	3	2	2	4	6	4	0	0	1	0	1	2	0	2	4	0	2	5	61
d__Bacteria	k__norank_d__Bacteria	p__Proteobacteria	c__Gammaproteobacteria	o__Diplorickettsiales	f__Diplorickettsiaceae	g__norank_f__Diplorickettsiaceae	s__unclassified_g__norank_f__Diplorickettsiaceae	OTU1867	5	3	1	0	0	0	0	0	0	3	1	3	0	8	1	0	0	0	0	3	1	2	0	3	2	2	4	42
d__Bacteria	k__norank_d__Bacteria	p__Proteobacteria	c__Gammaproteobacteria	o__Diplorickettsiales	f__Diplorickettsiaceae	g__norank_f__Diplorickettsiaceae	s__unclassified_g__norank_f__Diplorickettsiaceae	OTU3737	2	3	5	1	3	0	1	1	0	2	2	0	0	1	3	0	1	0	1	1	0	0	3	2	1	4	2	39
d__Bacteria	k__norank_d__Bacteria	p__Entotheonellaeota	c__Entotheonellia	o__Entotheonellales	f__Entotheonellaceae	g__norank_f__Entotheonellaceae	s__uncultured_bacterium_g__norank_f__Entotheonellaceae	OTU3042	2	3	0	1	17	1	0	2	1	1	7	3	0	8	0	9	24	1	1	4	1	4	3	3	1	5	3	105
d__Bacteria	k__norank_d__Bacteria	p__Entotheonellaeota	c__Entotheonellia	o__Entotheonellales	f__Entotheonellaceae	g__norank_f__Entotheonellaceae	s__uncultured_bacterium_g__norank_f__Entotheonellaceae	OTU2913	17	41	7	3	41	36	1	10	16	12	18	23	17	34	32	6	49	19	6	14	3	18	20	32	30	25	15	545
d__Bacteria	k__norank_d__Bacteria	p__Entotheonellaeota	c__Entotheonellia	o__Entotheonellales	f__Entotheonellaceae	g__norank_f__Entotheonellaceae	s__uncultured_microorganism_g__norank_f__Entotheonellaceae	OTU2982	4	5	1	1	11	6	4	3	2	2	3	5	1	9	4	5	8	5	3	3	1	1	3	7	1	6	3	107
d__Bacteria	k__norank_d__Bacteria	p__Entotheonellaeota	c__Entotheonellia	o__Entotheonellales	f__Entotheonellaceae	g__norank_f__Entotheonellaceae	s__unclassified_g__norank_f__Entotheonellaceae	OTU1298	1	2	0	1	7	3	0	1	1	2	2	5	2	1	1	0	6	1	0	3	0	0	0	1	0	4	3	47
d__Bacteria	k__norank_d__Bacteria	p__Entotheonellaeota	c__Entotheonellia	o__Entotheonellales	f__Entotheonellaceae	g__norank_f__Entotheonellaceae	s__uncultured_bacterium_g__norank_f__Entotheonellaceae	OTU3893	4	1	4	0	2	3	1	2	5	1	4	4	2	1	8	5	3	2	1	0	2	0	4	2	0	4	1	66
d__Bacteria	k__norank_d__Bacteria	p__Entotheonellaeota	c__Entotheonellia	o__Entotheonellales	f__Entotheonellaceae	g__norank_f__Entotheonellaceae	s__uncultured_bacterium_g__norank_f__Entotheonellaceae	OTU3968	2	5	6	1	12	10	1	2	7	6	7	5	1	10	11	5	15	0	4	10	0	3	11	10	4	7	3	158
d__Bacteria	k__norank_d__Bacteria	p__Armatimonadetes	c__Fimbriimonadia	o__Fimbriimonadales	f__Fimbriimonadaceae	g__norank_f__Fimbriimonadaceae	s__uncultured_bacterium_g__norank_f__Fimbriimonadaceae	OTU2476	4	0	5	0	0	0	0	0	3	1	3	0	0	4	0	0	0	1	1	7	0	7	1	0	9	6	2	54
d__Bacteria	k__norank_d__Bacteria	p__Armatimonadetes	c__Fimbriimonadia	o__Fimbriimonadales	f__Fimbriimonadaceae	g__norank_f__Fimbriimonadaceae	s__unclassified_g__norank_f__Fimbriimonadaceae	OTU3637	1	4	4	0	0	5	4	1	2	0	3	2	0	2	10	3	1	2	3	1	1	12	1	1	9	2	4	78
d__Bacteria	k__norank_d__Bacteria	p__Armatimonadetes	c__Fimbriimonadia	o__Fimbriimonadales	f__Fimbriimonadaceae	g__norank_f__Fimbriimonadaceae	s__metagenome_g__norank_f__Fimbriimonadaceae	OTU3507	49	62	124	59	42	32	31	31	61	33	47	29	22	32	48	14	11	50	35	60	16	69	28	59	106	52	27	1229
d__Bacteria	k__norank_d__Bacteria	p__Armatimonadetes	c__Fimbriimonadia	o__Fimbriimonadales	f__Fimbriimonadaceae	g__norank_f__Fimbriimonadaceae	s__uncultured_bacterium_g__norank_f__Fimbriimonadaceae	OTU3699	7	18	3	0	4	0	0	2	1	0	2	3	0	3	0	1	0	0	1	3	0	8	0	1	5	2	1	65
d__Bacteria	k__norank_d__Bacteria	p__Armatimonadetes	c__Fimbriimonadia	o__Fimbriimonadales	f__Fimbriimonadaceae	g__norank_f__Fimbriimonadaceae	s__uncultured_bacterium_g__norank_f__Fimbriimonadaceae	OTU3538	3	4	2	0	1	0	1	0	0	0	0	0	1	2	0	1	0	2	0	0	1	7	0	1	12	1	0	39
d__Bacteria	k__norank_d__Bacteria	p__Proteobacteria	c__Alphaproteobacteria	o__Rhodovibrionales	f__Fodinicurvataceae	g__norank_f__Fodinicurvataceae	s__uncultured_alpha_proteobacterium_g__norank_f__Fodinicurvataceae	OTU951	1	7	1	1	5	1	0	1	0	2	1	3	3	8	6	5	4	1	0	2	0	6	4	2	4	2	1	71
d__Bacteria	k__norank_d__Bacteria	p__Proteobacteria	c__Alphaproteobacteria	o__Tistrellales	f__Geminicoccaceae	g__norank_f__Geminicoccaceae	s__uncultured_bacterium_g__norank_f__Geminicoccaceae	OTU2394	3	0	0	0	8	0	0	0	0	0	8	6	0	6	5	1	2	5	0	2	0	1	1	2	1	1	0	52
d__Bacteria	k__norank_d__Bacteria	p__Proteobacteria	c__Alphaproteobacteria	o__Tistrellales	f__Geminicoccaceae	g__norank_f__Geminicoccaceae	s__unclassified_g__norank_f__Geminicoccaceae	OTU1350	1	4	1	0	3	0	1	0	0	0	7	1	1	10	0	1	3	1	0	0	0	1	1	2	2	0	1	41
d__Bacteria	k__norank_d__Bacteria	p__Proteobacteria	c__Alphaproteobacteria	o__Tistrellales	f__Geminicoccaceae	g__norank_f__Geminicoccaceae	s__uncultured_bacterium_g__norank_f__Geminicoccaceae	OTU1858	2	1	1	0	1	0	0	0	2	0	5	4	0	3	2	4	2	1	0	3	0	1	1	2	1	0	0	36
d__Bacteria	k__norank_d__Bacteria	p__Proteobacteria	c__Alphaproteobacteria	o__Tistrellales	f__Geminicoccaceae	g__norank_f__Geminicoccaceae	s__uncultured_bacterium_g__norank_f__Geminicoccaceae	OTU3056	3	2	0	1	6	0	0	0	0	0	7	6	1	3	1	6	1	1	0	5	0	2	2	3	5	0	1	56
d__Bacteria	k__norank_d__Bacteria	p__Proteobacteria	c__Alphaproteobacteria	o__Tistrellales	f__Geminicoccaceae	g__norank_f__Geminicoccaceae	s__uncultured_bacterium_g__norank_f__Geminicoccaceae	OTU4462	2	6	0	0	7	0	0	0	2	0	3	5	2	9	1	2	2	3	0	4	0	3	3	5	6	0	3	68
d__Bacteria	k__norank_d__Bacteria	p__Proteobacteria	c__Alphaproteobacteria	o__Tistrellales	f__Geminicoccaceae	g__norank_f__Geminicoccaceae	s__uncultured_bacterium_g__norank_f__Geminicoccaceae	OTU3266	4	9	1	1	5	2	0	0	0	1	12	7	0	9	2	4	1	4	1	7	0	8	7	5	10	3	0	103
d__Bacteria	k__norank_d__Bacteria	p__Planctomycetes	c__Planctomycetacia	o__Gemmatales	f__Gemmataceae	g__norank_f__Gemmataceae	s__unclassified_g__norank_f__Gemmataceae	OTU87	2	7	0	2	1	1	1	3	5	0	5	0	1	4	4	2	3	0	0	4	0	1	1	3	12	0	4	66
d__Bacteria	k__norank_d__Bacteria	p__Planctomycetes	c__Planctomycetacia	o__Gemmatales	f__Gemmataceae	g__norank_f__Gemmataceae	s__uncultured_Planctomycetales_bacterium_g__norank_f__Gemmataceae	OTU3837	1	9	5	0	1	4	0	0	4	1	4	0	0	1	3	2	5	4	0	4	1	1	4	2	7	4	2	69
d__Bacteria	k__norank_d__Bacteria	p__Planctomycetes	c__Planctomycetacia	o__Gemmatales	f__Gemmataceae	g__norank_f__Gemmataceae	s__uncultured_bacterium_g__norank_f__Gemmataceae	OTU2800	7	4	6	2	7	4	3	1	3	3	4	2	1	7	8	7	10	3	1	6	1	8	2	2	0	3	5	110
d__Bacteria	k__norank_d__Bacteria	p__Planctomycetes	c__Planctomycetacia	o__Gemmatales	f__Gemmataceae	g__norank_f__Gemmataceae	s__uncultured_bacterium_g__norank_f__Gemmataceae	OTU4407	2	1	6	2	0	4	0	4	1	0	0	1	1	1	5	7	16	1	1	0	0	2	2	1	3	3	6	70
d__Bacteria	k__norank_d__Bacteria	p__Planctomycetes	c__Planctomycetacia	o__Gemmatales	f__Gemmataceae	g__norank_f__Gemmataceae	s__uncultured_bacterium_g__norank_f__Gemmataceae	OTU4409	9	18	1	0	8	1	0	0	2	2	7	9	0	9	9	9	28	3	1	3	0	3	3	0	9	2	1	137
d__Bacteria	k__norank_d__Bacteria	p__Planctomycetes	c__Planctomycetacia	o__Gemmatales	f__Gemmataceae	g__norank_f__Gemmataceae	s__uncultured_bacterium_g__norank_f__Gemmataceae	OTU4030	2	7	2	0	0	0	0	0	1	0	4	1	0	2	2	0	0	0	0	2	0	0	1	1	0	1	0	26
d__Bacteria	k__norank_d__Bacteria	p__Planctomycetes	c__Planctomycetacia	o__Gemmatales	f__Gemmataceae	g__norank_f__Gemmataceae	s__uncultured_bacterium_g__norank_f__Gemmataceae	OTU4026	0	0	2	0	2	4	0	2	0	1	5	1	0	2	3	4	3	2	3	1	0	1	1	2	5	1	4	49
d__Bacteria	k__norank_d__Bacteria	p__Planctomycetes	c__Planctomycetacia	o__Gemmatales	f__Gemmataceae	g__norank_f__Gemmataceae	s__unclassified_g__norank_f__Gemmataceae	OTU1484	3	1	1	0	1	1	0	1	1	2	0	0	2	0	1	0	1	4	1	3	0	3	0	1	5	0	2	34
d__Bacteria	k__norank_d__Bacteria	p__Planctomycetes	c__Planctomycetacia	o__Gemmatales	f__Gemmataceae	g__norank_f__Gemmataceae	s__uncultured_bacterium_g__norank_f__Gemmataceae	OTU499	6	9	1	1	6	2	4	1	0	0	6	1	3	1	4	2	1	10	1	1	2	3	5	4	6	0	1	81
d__Bacteria	k__norank_d__Bacteria	p__Planctomycetes	c__Planctomycetacia	o__Gemmatales	f__Gemmataceae	g__norank_f__Gemmataceae	s__uncultured_bacterium_g__norank_f__Gemmataceae	OTU414	5	10	2	0	14	7	2	0	8	3	9	8	1	9	12	3	4	7	2	4	0	8	5	6	11	10	2	152
d__Bacteria	k__norank_d__Bacteria	p__Planctomycetes	c__Planctomycetacia	o__Gemmatales	f__Gemmataceae	g__norank_f__Gemmataceae	s__uncultured_bacterium_g__norank_f__Gemmataceae	OTU1232	0	5	0	1	1	2	2	0	1	1	0	3	0	3	2	1	6	1	0	0	0	2	1	2	6	0	1	41
d__Bacteria	k__norank_d__Bacteria	p__Planctomycetes	c__Planctomycetacia	o__Gemmatales	f__Gemmataceae	g__norank_f__Gemmataceae	s__uncultured_prokaryote_g__norank_f__Gemmataceae	OTU1296	5	12	0	0	22	4	0	2	4	0	19	8	2	8	17	3	8	0	2	3	0	0	7	9	1	4	1	141
d__Bacteria	k__norank_d__Bacteria	p__Planctomycetes	c__Planctomycetacia	o__Gemmatales	f__Gemmataceae	g__norank_f__Gemmataceae	s__uncultured_soil_bacterium_g__norank_f__Gemmataceae	OTU2612	7	4	6	0	3	2	2	1	2	4	5	5	3	3	7	4	5	5	2	4	1	3	1	3	7	2	0	91
d__Bacteria	k__norank_d__Bacteria	p__Gemmatimonadetes	c__Gemmatimonadetes	o__Gemmatimonadales	f__Gemmatimonadaceae	g__norank_f__Gemmatimonadaceae	s__uncultured_Gemmatimonadetes_bacterium_g__norank_f__Gemmatimonadaceae	OTU3079	4	2	1	0	12	0	1	1	0	2	17	7	1	11	2	0	0	0	0	10	0	0	10	5	0	3	0	89
d__Bacteria	k__norank_d__Bacteria	p__Gemmatimonadetes	c__Gemmatimonadetes	o__Gemmatimonadales	f__Gemmatimonadaceae	g__norank_f__Gemmatimonadaceae	s__metagenome_g__norank_f__Gemmatimonadaceae	OTU3891	24	35	9	3	27	6	6	2	3	10	39	18	12	72	5	5	3	32	6	28	1	41	23	19	31	13	14	487
d__Bacteria	k__norank_d__Bacteria	p__Gemmatimonadetes	c__Gemmatimonadetes	o__Gemmatimonadales	f__Gemmatimonadaceae	g__norank_f__Gemmatimonadaceae	s__uncultured_bacterium_g__norank_f__Gemmatimonadaceae	OTU3310	5	9	1	0	1	1	0	0	1	0	2	1	5	8	0	3	1	8	2	0	0	18	2	4	20	2	2	96
d__Bacteria	k__norank_d__Bacteria	p__Gemmatimonadetes	c__Gemmatimonadetes	o__Gemmatimonadales	f__Gemmatimonadaceae	g__norank_f__Gemmatimonadaceae	s__uncultured_alpha_proteobacterium_g__norank_f__Gemmatimonadaceae	OTU562	1	5	0	0	5	2	0	1	2	1	3	5	1	4	8	0	4	0	1	2	0	1	1	1	1	3	0	52
d__Bacteria	k__norank_d__Bacteria	p__Gemmatimonadetes	c__Gemmatimonadetes	o__Gemmatimonadales	f__Gemmatimonadaceae	g__norank_f__Gemmatimonadaceae	s__uncultured_bacterium_g__norank_f__Gemmatimonadaceae	OTU1675	4	0	0	0	0	0	0	0	0	0	0	0	0	3	0	25	32	0	0	0	0	0	0	0	0	0	0	64
d__Bacteria	k__norank_d__Bacteria	p__Gemmatimonadetes	c__Gemmatimonadetes	o__Gemmatimonadales	f__Gemmatimonadaceae	g__norank_f__Gemmatimonadaceae	s__uncultured_Gemmatimonadales_bacterium_g__norank	OTU2627	3	1	1	1	1	2	1	2	1	2	0	4	0	3	0	0	0	9	0	1	1	9	2	0	7	1	2	54
d__Bacteria	k__norank_d__Bacteria	p__Gemmatimonadetes	c__Gemmatimonadetes	o__Gemmatimonadales	f__Gemmatimonadaceae	g__norank_f__Gemmatimonadaceae	s__metagenome_g__norank_f__Gemmatimonadaceae	OTU440	6	16	5	1	14	3	1	3	6	4	24	19	5	18	17	5	0	5	3	18	3	23	24	2	36	5	2	268
d__Bacteria	k__norank_d__Bacteria	p__Gemmatimonadetes	c__Gemmatimonadetes	o__Gemmatimonadales	f__Gemmatimonadaceae	g__norank_f__Gemmatimonadaceae	s__unclassified_g__norank_f__Gemmatimonadaceae	OTU400	8	7	0	1	4	0	0	0	0	0	3	0	1	8	0	2	0	0	0	2	0	0	1	3	5	0	2	47
d__Bacteria	k__norank_d__Bacteria	p__Gemmatimonadetes	c__Gemmatimonadetes	o__Gemmatimonadales	f__Gemmatimonadaceae	g__norank_f__Gemmatimonadaceae	s__unclassified_g__norank_f__Gemmatimonadaceae	OTU2918	86	108	55	24	118	92	67	54	47	44	122	385	71	213	62	29	19	178	85	259	68	196	127	68	125	122	82	2906
d__Bacteria	k__norank_d__Bacteria	p__Gemmatimonadetes	c__Gemmatimonadetes	o__Gemmatimonadales	f__Gemmatimonadaceae	g__norank_f__Gemmatimonadaceae	s__unclassified_g__norank_f__Gemmatimonadaceae	OTU2828	34	34	16	6	23	9	9	7	12	16	38	30	15	52	20	21	18	19	5	34	6	27	38	18	24	17	15	563
d__Bacteria	k__norank_d__Bacteria	p__Gemmatimonadetes	c__Gemmatimonadetes	o__Gemmatimonadales	f__Gemmatimonadaceae	g__norank_f__Gemmatimonadaceae	s__unclassified_g__norank_f__Gemmatimonadaceae	OTU2997	11	40	3	1	39	1	0	0	2	1	49	33	0	17	12	12	9	6	1	25	0	7	17	5	8	9	2	310
d__Bacteria	k__norank_d__Bacteria	p__Gemmatimonadetes	c__Gemmatimonadetes	o__Gemmatimonadales	f__Gemmatimonadaceae	g__norank_f__Gemmatimonadaceae	s__uncultured_Gemmatimonadetes_bacterium_g__norank_f__Gemmatimonadaceae	OTU3027	17	6	8	4	16	8	1	3	2	1	17	15	5	30	8	9	4	39	1	12	3	32	22	16	38	5	4	326
d__Bacteria	k__norank_d__Bacteria	p__Gemmatimonadetes	c__Gemmatimonadetes	o__Gemmatimonadales	f__Gemmatimonadaceae	g__norank_f__Gemmatimonadaceae	s__unclassified_g__norank_f__Gemmatimonadaceae	OTU3080	2	8	2	3	30	2	2	0	4	2	18	9	0	15	6	6	4	2	6	9	0	9	12	4	6	2	3	166
d__Bacteria	k__norank_d__Bacteria	p__Gemmatimonadetes	c__Gemmatimonadetes	o__Gemmatimonadales	f__Gemmatimonadaceae	g__norank_f__Gemmatimonadaceae	s__unclassified_g__norank_f__Gemmatimonadaceae	OTU915	9	11	1	0	5	0	1	0	0	0	15	18	1	10	2	1	2	14	0	8	0	9	9	6	21	0	2	145
d__Bacteria	k__norank_d__Bacteria	p__Gemmatimonadetes	c__Gemmatimonadetes	o__Gemmatimonadales	f__Gemmatimonadaceae	g__norank_f__Gemmatimonadaceae	s__unclassified_g__norank_f__Gemmatimonadaceae	OTU3960	1	1	0	1	3	0	0	0	1	0	4	10	0	12	3	2	2	11	1	5	0	19	4	0	6	0	2	88
d__Bacteria	k__norank_d__Bacteria	p__Gemmatimonadetes	c__Gemmatimonadetes	o__Gemmatimonadales	f__Gemmatimonadaceae	g__norank_f__Gemmatimonadaceae	s__Gemmatimonadetes_bacterium_LX87	OTU3655	1	1	0	0	1	0	0	0	0	0	0	0	0	6	0	0	2	2	0	0	0	9	3	0	8	0	0	33
d__Bacteria	k__norank_d__Bacteria	p__Gemmatimonadetes	c__Gemmatimonadetes	o__Gemmatimonadales	f__Gemmatimonadaceae	g__norank_f__Gemmatimonadaceae	s__unclassified_g__norank_f__Gemmatimonadaceae	OTU4035	1	3	1	2	1	1	0	2	2	0	1	5	0	6	1	44	10	0	0	3	0	3	2	0	0	0	8	96
d__Bacteria	k__norank_d__Bacteria	p__Gemmatimonadetes	c__Gemmatimonadetes	o__Gemmatimonadales	f__Gemmatimonadaceae	g__norank_f__Gemmatimonadaceae	s__unclassified_g__norank_f__Gemmatimonadaceae	OTU1716	13	0	0	0	8	0	0	1	1	0	0	0	0	11	2	48	76	0	0	1	0	3	6	0	1	0	0	171
d__Bacteria	k__norank_d__Bacteria	p__Gemmatimonadetes	c__Gemmatimonadetes	o__Gemmatimonadales	f__Gemmatimonadaceae	g__norank_f__Gemmatimonadaceae	s__uncultured_actinobacterium_g__norank_f__Gemmatimonadaceae	OTU3186	40	21	2	1	23	7	0	5	13	10	20	19	3	32	5	114	135	0	0	22	0	24	23	5	4	10	8	546
d__Bacteria	k__norank_d__Bacteria	p__Gemmatimonadetes	c__Gemmatimonadetes	o__Gemmatimonadales	f__Gemmatimonadaceae	g__norank_f__Gemmatimonadaceae	s__unclassified_g__norank_f__Gemmatimonadaceae	OTU3088	10	29	6	3	5	2	2	5	2	4	12	15	4	14	7	1	3	0	3	16	1	5	14	6	22	13	11	215
d__Bacteria	k__norank_d__Bacteria	p__Gemmatimonadetes	c__Gemmatimonadetes	o__Gemmatimonadales	f__Gemmatimonadaceae	g__norank_f__Gemmatimonadaceae	s__uncultured_Gemmatimonas_sp._g__norank	OTU112	3	3	0	0	1	1	0	1	0	1	3	0	0	7	1	0	0	3	0	1	0	12	4	1	2	2	0	46
d__Bacteria	k__norank_d__Bacteria	p__Gemmatimonadetes	c__Gemmatimonadetes	o__Gemmatimonadales	f__Gemmatimonadaceae	g__norank_f__Gemmatimonadaceae	s__uncultured_bacterium_g__norank_f__Gemmatimonadaceae	OTU398	7	7	0	1	13	2	0	1	0	1	8	10	0	11	2	9	27	0	0	6	0	2	7	1	2	5	0	122
d__Bacteria	k__norank_d__Bacteria	p__Gemmatimonadetes	c__Gemmatimonadetes	o__Gemmatimonadales	f__Gemmatimonadaceae	g__norank_f__Gemmatimonadaceae	s__unclassified_g__norank_f__Gemmatimonadaceae	OTU3214	14	1	4	2	5	1	0	3	4	2	2	2	1	9	0	137	91	1	2	6	2	17	9	1	15	1	3	335
d__Bacteria	k__norank_d__Bacteria	p__Gemmatimonadetes	c__Gemmatimonadetes	o__Gemmatimonadales	f__Gemmatimonadaceae	g__norank_f__Gemmatimonadaceae	s__unclassified_g__norank_f__Gemmatimonadaceae	OTU3453	5	12	2	1	9	0	0	0	1	1	17	2	1	9	1	4	3	1	0	6	0	6	9	4	2	2	3	101
d__Bacteria	k__norank_d__Bacteria	p__Gemmatimonadetes	c__Gemmatimonadetes	o__Gemmatimonadales	f__Gemmatimonadaceae	g__norank_f__Gemmatimonadaceae	s__metagenome_g__norank_f__Gemmatimonadaceae	OTU2911	58	24	5	7	27	9	6	13	33	13	25	5	6	59	17	173	524	17	8	23	5	50	36	1	27	27	27	1225
d__Bacteria	k__norank_d__Bacteria	p__Gemmatimonadetes	c__Gemmatimonadetes	o__Gemmatimonadales	f__Gemmatimonadaceae	g__norank_f__Gemmatimonadaceae	s__uncultured_bacterium_g__norank_f__Gemmatimonadaceae	OTU323	4	1	11	2	0	0	3	1	0	2	0	0	4	0	0	1	0	4	0	3	2	9	0	0	7	1	2	57
d__Bacteria	k__norank_d__Bacteria	p__Gemmatimonadetes	c__Gemmatimonadetes	o__Gemmatimonadales	f__Gemmatimonadaceae	g__norank_f__Gemmatimonadaceae	s__uncultured_Gemmatimonadetes_bacterium_g__norank_f__Gemmatimonadaceae	OTU3091	44	97	9	5	39	5	3	7	13	10	62	24	8	69	29	13	17	13	3	55	4	34	49	18	41	21	19	711
d__Bacteria	k__norank_d__Bacteria	p__Gemmatimonadetes	c__Gemmatimonadetes	o__Gemmatimonadales	f__Gemmatimonadaceae	g__norank_f__Gemmatimonadaceae	s__unclassified_g__norank_f__Gemmatimonadaceae	OTU3159	16	18	10	4	32	11	4	16	21	13	33	36	1	29	28	2	6	3	3	28	3	4	18	9	6	21	7	382
d__Bacteria	k__norank_d__Bacteria	p__Gemmatimonadetes	c__Gemmatimonadetes	o__Gemmatimonadales	f__Gemmatimonadaceae	g__norank_f__Gemmatimonadaceae	s__Gemmatimonas_sp._WX54	OTU2959	11	5	1	2	17	7	1	0	0	1	17	66	6	14	2	9	1	36	4	98	7	8	8	6	12	6	4	349
d__Bacteria	k__norank_d__Bacteria	p__Gemmatimonadetes	c__Gemmatimonadetes	o__Gemmatimonadales	f__Gemmatimonadaceae	g__norank_f__Gemmatimonadaceae	s__uncultured_Gemmatimonadales_bacterium_g__norank	OTU589	0	4	0	0	4	1	0	0	1	0	6	6	1	3	0	0	2	1	0	4	0	2	4	1	2	0	1	43
d__Bacteria	k__norank_d__Bacteria	p__Gemmatimonadetes	c__Gemmatimonadetes	o__Gemmatimonadales	f__Gemmatimonadaceae	g__norank_f__Gemmatimonadaceae	s__Gemmatimonadetes_bacterium_LP81	OTU2936	19	31	23	12	22	15	22	10	12	11	27	46	19	25	6	8	8	46	22	74	10	35	35	24	30	20	14	626
d__Bacteria	k__norank_d__Bacteria	p__Planctomycetes	c__Planctomycetacia	o__Planctomycetales	f__Gimesiaceae	g__norank_f__Gimesiaceae	s__uncultured_bacterium_g__norank_f__Gimesiaceae	OTU601	0	9	0	0	6	0	0	3	2	0	5	3	0	1	1	0	2	0	1	3	0	0	0	1	1	4	2	44
d__Bacteria	k__norank_d__Bacteria	p__Planctomycetes	c__Planctomycetacia	o__Planctomycetales	f__Gimesiaceae	g__norank_f__Gimesiaceae	s__uncultured_Planctomyces_sp._g__norank_f__Gimesiaceae	OTU2257	5	6	4	1	32	3	0	7	19	2	11	30	1	3	36	3	4	0	1	6	1	8	5	4	17	17	4	230
d__Bacteria	k__norank_d__Bacteria	p__Planctomycetes	c__Planctomycetacia	o__Planctomycetales	f__Gimesiaceae	g__norank_f__Gimesiaceae	s__unclassified_g__norank_f__Gimesiaceae	OTU3815	3	4	1	0	5	0	0	0	3	1	5	4	0	2	6	1	0	0	0	1	0	2	4	3	0	3	0	48
d__Bacteria	k__norank_d__Bacteria	p__Proteobacteria	c__Alphaproteobacteria	o__Holosporales	f__Holosporaceae	g__norank_f__Holosporaceae	s__uncultured_bacterium_g__norank_f__Holosporaceae	OTU1036	3	1	1	1	0	2	0	0	1	0	1	8	0	7	11	7	4	2	0	1	0	9	3	1	21	1	0	85
d__Bacteria	k__norank_d__Bacteria	p__Proteobacteria	c__Alphaproteobacteria	o__Holosporales	f__Holosporaceae	g__norank_f__Holosporaceae	s__uncultured_bacterium_g__norank_f__Holosporaceae	OTU1313	2	0	1	2	4	1	3	3	3	3	10	10	9	10	6	2	1	3	9	9	0	6	10	4	9	5	3	128
d__Bacteria	k__norank_d__Bacteria	p__Proteobacteria	c__Alphaproteobacteria	o__Holosporales	f__Holosporaceae	g__norank_f__Holosporaceae	s__unclassified_g__norank_f__Holosporaceae	OTU4527	1	1	0	0	0	0	0	0	0	0	0	1	2	1	0	1	0	5	0	1	0	8	0	1	6	0	1	29
d__Bacteria	k__norank_d__Bacteria	p__Hydrogenedentes	c__Hydrogenedentia	o__Hydrogenedentiales	f__Hydrogenedensaceae	g__norank_f__Hydrogenedensaceae	s__uncultured_bacterium_g__norank_f__Hydrogenedensaceae	OTU3148	9	16	0	0	10	5	2	14	6	4	5	15	1	29	7	3	8	2	2	9	0	2	16	3	2	7	4	181
d__Bacteria	k__norank_d__Bacteria	p__Hydrogenedentes	c__Hydrogenedentia	o__Hydrogenedentiales	f__Hydrogenedensaceae	g__norank_f__Hydrogenedensaceae	s__uncultured_bacterium_g__norank_f__Hydrogenedensaceae	OTU1212	5	11	0	0	2	0	0	5	5	3	6	2	0	2	3	2	1	0	2	0	1	0	2	2	1	3	1	59
d__Bacteria	k__norank_d__Bacteria	p__Hydrogenedentes	c__Hydrogenedentia	o__Hydrogenedentiales	f__Hydrogenedensaceae	g__norank_f__Hydrogenedensaceae	s__uncultured_bacterium_g__norank_f__Hydrogenedensaceae	OTU594	4	18	1	0	1	2	0	4	5	1	2	1	1	6	2	0	2	0	0	4	2	2	3	1	2	4	2	70
d__Bacteria	k__norank_d__Bacteria	p__Hydrogenedentes	c__Hydrogenedentia	o__Hydrogenedentiales	f__Hydrogenedensaceae	g__norank_f__Hydrogenedensaceae	s__unclassified_g__norank_f__Hydrogenedensaceae	OTU3222	7	4	1	1	2	0	0	3	4	1	5	1	0	3	0	0	0	0	0	3	0	0	2	1	0	3	2	43
d__Bacteria	k__norank_d__Bacteria	p__Hydrogenedentes	c__Hydrogenedentia	o__Hydrogenedentiales	f__Hydrogenedensaceae	g__norank_f__Hydrogenedensaceae	s__metagenome_g__norank_f__Hydrogenedensaceae	OTU3298	3	1	3	2	0	4	0	1	6	1	6	12	1	1	23	0	4	1	1	3	1	6	1	3	3	4	1	92
d__Bacteria	k__norank_d__Bacteria	p__Hydrogenedentes	c__Hydrogenedentia	o__Hydrogenedentiales	f__Hydrogenedensaceae	g__norank_f__Hydrogenedensaceae	s__unclassified_g__norank_f__Hydrogenedensaceae	OTU3376	5	11	6	0	2	0	0	0	1	6	4	8	2	6	9	0	1	1	1	4	1	2	3	4	4	0	7	88
d__Bacteria	k__norank_d__Bacteria	p__Hydrogenedentes	c__Hydrogenedentia	o__Hydrogenedentiales	f__Hydrogenedensaceae	g__norank_f__Hydrogenedensaceae	s__unclassified_g__norank_f__Hydrogenedensaceae	OTU2806	16	30	12	1	1	0	16	4	6	8	11	1	5	12	1	3	0	11	2	4	10	23	4	5	8	6	12	212
d__Bacteria	k__norank_d__Bacteria	p__Hydrogenedentes	c__Hydrogenedentia	o__Hydrogenedentiales	f__Hydrogenedensaceae	g__norank_f__Hydrogenedensaceae	s__uncultured_bacterium_g__norank_f__Hydrogenedensaceae	OTU1417	2	0	4	2	2	1	2	3	0	1	4	2	1	6	0	0	0	0	0	1	1	4	3	0	5	2	0	46
d__Bacteria	k__norank_d__Bacteria	p__Actinobacteria	c__Actinobacteria	o__Microtrichales	f__Ilumatobacteraceae	g__norank_f__Ilumatobacteraceae	s__unclassified_g__norank_f__Ilumatobacteraceae	OTU3268	4	8	1	1	5	5	0	1	2	1	16	9	2	11	7	5	3	2	2	6	0	4	3	3	7	1	0	109
d__Bacteria	k__norank_d__Bacteria	p__Planctomycetes	c__Planctomycetacia	o__Isosphaerales	f__Isosphaeraceae	g__norank_f__Isosphaeraceae	s__unclassified_g__norank_f__Isosphaeraceae	OTU2508	0	1	0	0	4	0	0	0	0	0	0	4	0	2	1	0	0	4	0	0	4	7	0	0	1	1	0	29
d__Bacteria	k__norank_d__Bacteria	p__Planctomycetes	c__Planctomycetacia	o__Isosphaerales	f__Isosphaeraceae	g__norank_f__Isosphaeraceae	s__unclassified_g__norank_f__Isosphaeraceae	OTU3357	0	0	0	0	4	0	0	0	1	0	2	10	0	2	2	2	1	4	0	1	0	5	0	4	2	0	0	40
d__Bacteria	k__norank_d__Bacteria	p__Chloroflexi	c__Ktedonobacteria	o__Ktedonobacterales	f__JG30-KF-AS9	g__norank_f__JG30-KF-AS9	s__uncultured_bacterium_g__norank_f__JG30-KF-AS9	OTU2742	12	2	10	0	5	19	5	6	3	2	4	18	4	8	1	1	0	34	15	18	14	18	4	3	9	10	12	237
d__Bacteria	k__norank_d__Bacteria	p__Chloroflexi	c__Ktedonobacteria	o__Ktedonobacterales	f__JG30-KF-AS9	g__norank_f__JG30-KF-AS9	s__uncultured_bacterium_g__norank_f__JG30-KF-AS9	OTU2492	0	0	0	3	0	0	3	0	0	2	0	0	3	0	4	0	2	15	9	2	3	7	0	1	9	1	3	67
d__Bacteria	k__norank_d__Bacteria	p__Chloroflexi	c__Ktedonobacteria	o__Ktedonobacterales	f__JG30-KF-AS9	g__norank_f__JG30-KF-AS9	s__uncultured_bacterium_g__norank_f__JG30-KF-AS9	OTU3884	4	3	20	3	3	9	21	2	5	5	2	10	16	3	1	1	4	59	17	9	29	12	3	7	12	3	4	267
d__Bacteria	k__norank_d__Bacteria	p__Chloroflexi	c__Ktedonobacteria	o__Ktedonobacterales	f__JG30-KF-AS9	g__norank_f__JG30-KF-AS9	s__uncultured_bacterium_g__norank_f__JG30-KF-AS9	OTU3488	10	4	14	1	15	31	14	10	6	11	7	30	6	14	1	1	4	70	11	120	18	9	14	13	10	14	14	472
d__Bacteria	k__norank_d__Bacteria	p__Chloroflexi	c__Ktedonobacteria	o__Ktedonobacterales	f__JG30-KF-AS9	g__norank_f__JG30-KF-AS9	s__uncultured_bacterium_g__norank_f__JG30-KF-AS9	OTU3017	3	0	0	0	5	3	0	0	0	0	2	12	2	10	0	2	2	19	2	9	5	7	4	2	7	2	1	99
d__Bacteria	k__norank_d__Bacteria	p__Chloroflexi	c__Chloroflexia	o__Thermomicrobiales	f__JG30-KF-CM45	g__norank_f__JG30-KF-CM45	s__unclassified_g__norank_f__JG30-KF-CM45	OTU1754	3	6	0	0	6	1	2	0	0	1	5	6	4	9	1	6	3	4	1	5	0	4	6	2	6	2	1	84
d__Bacteria	k__norank_d__Bacteria	p__Chloroflexi	c__Chloroflexia	o__Thermomicrobiales	f__JG30-KF-CM45	g__norank_f__JG30-KF-CM45	s__uncultured_anaerobic_ammonium-oxidizing_bacterium_g__norank_f__JG30-KF-CM45	OTU2397	3	4	1	1	5	0	0	0	0	2	5	5	3	8	2	1	2	2	4	3	2	3	6	0	5	3	0	70
d__Bacteria	k__norank_d__Bacteria	p__Chloroflexi	c__Chloroflexia	o__Thermomicrobiales	f__JG30-KF-CM45	g__norank_f__JG30-KF-CM45	s__unclassified_g__norank_f__JG30-KF-CM45	OTU3028	1	3	1	2	2	2	3	0	2	0	3	6	4	4	0	0	1	2	0	2	0	2	5	0	1	0	0	46
d__Bacteria	k__norank_d__Bacteria	p__Chloroflexi	c__Chloroflexia	o__Thermomicrobiales	f__JG30-KF-CM45	g__norank_f__JG30-KF-CM45	s__uncultured_bacterium_g__norank_f__JG30-KF-CM45	OTU668	8	3	1	0	14	0	1	0	1	1	7	12	2	9	3	3	2	4	0	7	1	11	3	5	16	4	2	120
d__Bacteria	k__norank_d__Bacteria	p__Bacteroidetes	c__Bacteroidia	o__Sphingobacteriales	f__KD3-93	g__norank_f__KD3-93	s__uncultured_bacterium_g__norank_f__KD3-93	OTU2690	1	0	0	0	0	0	0	8	0	4	0	0	0	7	0	1	0	0	1	2	0	3	0	0	2	0	0	29
d__Bacteria	k__norank_d__Bacteria	p__Bacteroidetes	c__Bacteroidia	o__Sphingobacteriales	f__KD3-93	g__norank_f__KD3-93	s__unclassified_g__norank_f__KD3-93	OTU262	1	3	0	0	0	2	0	1	4	52	2	0	4	2	3	1	0	1	11	3	1	7	5	8	1	9	17	138
d__Bacteria	k__norank_d__Bacteria	p__Bacteroidetes	c__Bacteroidia	o__Sphingobacteriales	f__KD3-93	g__norank_f__KD3-93	s__unclassified_g__norank_f__KD3-93	OTU1446	0	0	0	0	1	0	0	0	0	0	0	0	1	3	1	0	0	1	0	5	0	0	1	3	0	4	9	29
d__Bacteria	k__norank_d__Bacteria	p__Bacteroidetes	c__Bacteroidia	o__Sphingobacteriales	f__KD3-93	g__norank_f__KD3-93	s__unclassified_g__norank_f__KD3-93	OTU1532	0	0	0	0	0	1	1	3	6	6	3	0	0	6	0	0	0	2	15	5	1	9	4	5	6	0	1	74
d__Bacteria	k__norank_d__Bacteria	p__Proteobacteria	c__Alphaproteobacteria	o__Rhizobiales	f__KF-JG30-B3	g__norank_f__KF-JG30-B3	s__unclassified_g__norank_f__KF-JG30-B3	OTU2681	4	2	0	0	1	1	1	0	0	1	0	0	0	4	2	3	5	1	0	1	2	4	1	1	5	0	0	39
d__Bacteria	k__norank_d__Bacteria	p__Proteobacteria	c__Alphaproteobacteria	o__Rhizobiales	f__KF-JG30-B3	g__norank_f__KF-JG30-B3	s__uncultured_bacterium_g__norank_f__KF-JG30-B3	OTU2574	8	1	3	1	2	0	4	2	1	0	4	0	3	5	0	8	3	14	4	4	3	22	0	1	14	0	4	111
d__Bacteria	k__norank_d__Bacteria	p__Proteobacteria	c__Alphaproteobacteria	o__Rhizobiales	f__KF-JG30-B3	g__norank_f__KF-JG30-B3	s__uncultured_bacterium_g__norank_f__KF-JG30-B3	OTU1483	6	9	1	0	5	1	0	1	1	0	6	1	1	9	1	3	9	6	0	4	0	12	0	2	4	4	1	87
d__Bacteria	k__norank_d__Bacteria	p__Chloroflexi	c__Ktedonobacteria	o__Ktedonobacterales	f__Ktedonobacteraceae	g__norank_f__Ktedonobacteraceae	s__uncultured_soil_bacterium_g__norank_f__Ktedonobacteraceae	OTU684	10	2	1	0	46	7	1	1	3	0	3	65	0	14	14	1	0	7	1	164	2	7	3	6	1	1	4	364
d__Bacteria	k__norank_d__Bacteria	p__Latescibacteria	c__Latescibacteria	o__Latescibacterales	f__Latescibacteraceae	g__norank_f__Latescibacteraceae	s__unclassified_g__norank_f__Latescibacteraceae	OTU1722	47	113	14	5	44	4	2	5	9	2	79	46	2	99	17	3	14	6	2	42	0	43	28	23	61	13	9	732
d__Bacteria	k__norank_d__Bacteria	p__Latescibacteria	c__Latescibacteria	o__Latescibacterales	f__Latescibacteraceae	g__norank_f__Latescibacteraceae	s__unclassified_g__norank_f__Latescibacteraceae	OTU205	36	110	2	0	49	1	0	0	6	3	63	33	5	118	17	8	18	5	0	42	1	20	30	12	104	11	6	700
d__Bacteria	k__norank_d__Bacteria	p__Latescibacteria	c__Latescibacteria	o__Latescibacterales	f__Latescibacteraceae	g__norank_f__Latescibacteraceae	s__uncultured_bacterium_g__norank_f__Latescibacteraceae	OTU719	4	3	1	1	1	0	0	0	1	0	0	4	0	0	1	14	6	0	0	1	0	6	1	2	1	0	5	52
d__Bacteria	k__norank_d__Bacteria	p__Gemmatimonadetes	c__Gemmatimonadetes	o__Longimicrobiales	f__Longimicrobiaceae	g__norank_f__Longimicrobiaceae	s__uncultured_bacterium_g__norank_f__Longimicrobiaceae	OTU3406	0	4	1	3	1	3	2	0	1	2	3	3	4	3	0	5	0	9	4	5	3	7	3	13	2	4	2	87
d__Bacteria	k__norank_d__Bacteria	p__Gemmatimonadetes	c__Gemmatimonadetes	o__Longimicrobiales	f__Longimicrobiaceae	g__norank_f__Longimicrobiaceae	s__uncultured_bacterium_g__norank_f__Longimicrobiaceae	OTU2420	1	0	0	0	3	0	0	0	0	0	12	6	0	7	0	0	0	0	0	3	0	4	2	1	7	1	2	49
d__Bacteria	k__norank_d__Bacteria	p__Gemmatimonadetes	c__Gemmatimonadetes	o__Longimicrobiales	f__Longimicrobiaceae	g__norank_f__Longimicrobiaceae	s__uncultured_bacterium_g__norank_f__Longimicrobiaceae	OTU1727	3	0	2	0	7	0	1	0	0	1	5	2	4	2	0	4	0	5	1	4	2	7	2	4	5	1	1	63
d__Bacteria	k__norank_d__Bacteria	p__Bacteroidetes	c__Bacteroidia	o__Cytophagales	f__MWH-CFBk5	g__norank_f__MWH-CFBk5	s__uncultured_bacterium_g__norank_f__MWH-CFBk5	OTU4386	0	1	1	2	2	0	0	0	5	0	8	0	0	0	0	1	2	0	1	3	0	0	0	3	11	1	0	41
d__Bacteria	k__norank_d__Bacteria	p__Bacteroidetes	c__Bacteroidia	o__Cytophagales	f__MWH-CFBk5	g__norank_f__MWH-CFBk5	s__uncultured_bacterium_g__norank_f__MWH-CFBk5	OTU2511	2	0	1	4	0	0	1	1	0	0	0	1	33	1	3	0	0	0	0	2	1	1	0	1	7	1	9	69
d__Bacteria	k__norank_d__Bacteria	p__Proteobacteria	c__Alphaproteobacteria	o__Rhodospirillales	f__Magnetospiraceae	g__norank_f__Magnetospiraceae	s__unclassified_g__norank_f__Magnetospiraceae	OTU2019	2	4	0	0	0	0	0	0	0	0	0	1	0	4	0	0	0	0	0	1	0	0	0	0	0	1	0	13
d__Bacteria	k__norank_d__Bacteria	p__Proteobacteria	c__Alphaproteobacteria	o__Rhodospirillales	f__Magnetospiraceae	g__norank_f__Magnetospiraceae	s__uncultured_bacterium_g__norank_f__Magnetospiraceae	OTU90	2	7	2	0	2	3	1	0	3	6	4	6	10	1	0	1	1	8	3	14	2	5	7	2	3	1	1	95
d__Bacteria	k__norank_d__Bacteria	p__Proteobacteria	c__Alphaproteobacteria	o__Rhizobiales	f__Methyloligellaceae	g__norank_f__Methyloligellaceae	s__unclassified_g__norank_f__Methyloligellaceae	OTU1490	40	49	26	5	49	22	8	8	9	9	63	47	17	71	42	31	34	62	14	41	4	48	56	43	89	27	15	929
d__Bacteria	k__norank_d__Bacteria	p__Proteobacteria	c__Alphaproteobacteria	o__Rhizobiales	f__Methyloligellaceae	g__norank_f__Methyloligellaceae	s__unclassified_g__norank_f__Methyloligellaceae	OTU672	9	11	7	1	38	11	2	2	10	4	18	16	8	38	10	9	34	14	1	19	4	10	15	13	22	9	7	342
d__Bacteria	k__norank_d__Bacteria	p__Proteobacteria	c__Alphaproteobacteria	o__Rhizobiales	f__Methyloligellaceae	g__norank_f__Methyloligellaceae	s__unclassified_g__norank_f__Methyloligellaceae	OTU599	32	36	3	3	16	7	8	1	7	8	26	33	8	38	18	19	25	24	6	30	1	34	24	32	41	16	6	502
d__Bacteria	k__norank_d__Bacteria	p__Proteobacteria	c__Alphaproteobacteria	o__Micropepsales	f__Micropepsaceae	g__norank_f__Micropepsaceae	s__uncultured_bacterium_g__norank_f__Micropepsaceae	OTU2837	9	4	5	0	11	6	6	2	0	1	3	8	7	6	3	3	0	11	1	20	8	5	2	3	2	5	6	137
d__Bacteria	k__norank_d__Bacteria	p__Proteobacteria	c__Alphaproteobacteria	o__Micropepsales	f__Micropepsaceae	g__norank_f__Micropepsaceae	s__unclassified_g__norank_f__Micropepsaceae	OTU3314	5	3	8	2	1	3	5	1	0	0	11	2	9	6	1	1	3	31	3	2	6	6	1	5	7	2	4	128
d__Bacteria	k__norank_d__Bacteria	p__Proteobacteria	c__Alphaproteobacteria	o__Micropepsales	f__Micropepsaceae	g__norank_f__Micropepsaceae	s__metagenome_g__norank_f__Micropepsaceae	OTU2277	2	1	1	0	0	9	12	1	0	2	2	2	9	8	6	2	5	27	15	1	11	29	2	2	14	3	5	171
d__Bacteria	k__norank_d__Bacteria	p__Proteobacteria	c__Alphaproteobacteria	o__Micropepsales	f__Micropepsaceae	g__norank_f__Micropepsaceae	s__metagenome_g__norank_f__Micropepsaceae	OTU39	9	4	8	4	2	11	25	5	0	10	3	2	14	4	2	2	1	51	7	1	10	21	4	8	11	7	7	233
d__Bacteria	k__norank_d__Bacteria	p__Proteobacteria	c__Alphaproteobacteria	o__Micropepsales	f__Micropepsaceae	g__norank_f__Micropepsaceae	s__unclassified_g__norank_f__Micropepsaceae	OTU2260	1	0	1	0	0	0	8	0	0	1	0	0	2	0	0	0	2	17	6	0	2	13	0	0	7	0	0	60
d__Bacteria	k__norank_d__Bacteria	p__Proteobacteria	c__Alphaproteobacteria	o__Micropepsales	f__Micropepsaceae	g__norank_f__Micropepsaceae	s__unclassified_g__norank_f__Micropepsaceae	OTU2652	3	1	1	4	7	17	12	2	1	5	3	11	15	14	8	2	2	40	12	18	10	23	4	21	13	2	8	259
d__Bacteria	k__norank_d__Bacteria	p__Proteobacteria	c__Alphaproteobacteria	o__Micropepsales	f__Micropepsaceae	g__norank_f__Micropepsaceae	s__unclassified_g__norank_f__Micropepsaceae	OTU20	16	16	4	1	6	6	5	0	2	5	13	4	6	28	4	4	3	17	1	26	5	29	4	5	30	4	7	251
d__Bacteria	k__norank_d__Bacteria	p__Proteobacteria	c__Alphaproteobacteria	o__Micropepsales	f__Micropepsaceae	g__norank_f__Micropepsaceae	s__uncultured_alpha_proteobacterium_g__norank_f__Micropepsaceae	OTU2263	2	4	3	1	2	11	13	1	2	6	5	18	21	4	0	1	1	63	15	3	13	9	2	6	5	3	7	221
d__Bacteria	k__norank_d__Bacteria	p__Proteobacteria	c__Alphaproteobacteria	o__Micropepsales	f__Micropepsaceae	g__norank_f__Micropepsaceae	s__uncultured_bacterium_g__norank_f__Micropepsaceae	OTU1805	4	4	3	0	0	0	0	0	0	1	0	0	3	0	0	0	0	3	0	0	0	0	0	0	0	0	8	26
d__Bacteria	k__norank_d__Bacteria	p__Bacteroidetes	c__Bacteroidia	o__Cytophagales	f__Microscillaceae	g__norank_f__Microscillaceae	s__unclassified_g__norank_f__Microscillaceae	OTU1209	51	63	135	47	10	10	19	92	30	69	43	24	11	82	31	13	8	12	38	51	8	25	34	44	46	209	63	1268
d__Bacteria	k__norank_d__Bacteria	p__Bacteroidetes	c__Bacteroidia	o__Cytophagales	f__Microscillaceae	g__norank_f__Microscillaceae	s__unclassified_g__norank_f__Microscillaceae	OTU47	2	4	3	0	1	2	13	6	3	2	1	0	6	3	2	1	1	20	13	1	6	5	2	2	2	7	7	115
d__Bacteria	k__norank_d__Bacteria	p__Bacteroidetes	c__Bacteroidia	o__Cytophagales	f__Microscillaceae	g__norank_f__Microscillaceae	s__unclassified_g__norank_f__Microscillaceae	OTU2370	112	136	91	41	34	23	69	53	53	56	96	50	65	166	54	38	19	15	22	100	12	56	66	127	75	131	120	1880
d__Bacteria	k__norank_d__Bacteria	p__Bacteroidetes	c__Bacteroidia	o__Cytophagales	f__Microscillaceae	g__norank_f__Microscillaceae	s__metagenome_g__norank_f__Microscillaceae	OTU1533	10	18	11	11	12	34	4	47	27	28	6	19	3	1	43	3	0	6	11	7	21	32	2	14	10	8	19	407
d__Bacteria	k__norank_d__Bacteria	p__Bacteroidetes	c__Bacteroidia	o__Cytophagales	f__Microscillaceae	g__norank_f__Microscillaceae	s__unclassified_g__norank_f__Microscillaceae	OTU1087	0	1	0	0	1	0	0	0	8	0	0	3	0	0	14	0	1	0	0	1	0	7	0	2	1	3	0	42
d__Bacteria	k__norank_d__Bacteria	p__Bacteroidetes	c__Bacteroidia	o__Cytophagales	f__Microscillaceae	g__norank_f__Microscillaceae	s__unclassified_g__norank_f__Microscillaceae	OTU1432	0	0	1	0	1	0	0	0	7	13	1	1	0	0	5	0	0	1	2	0	0	2	2	0	0	2	0	38
d__Bacteria	k__norank_d__Bacteria	p__Bacteroidetes	c__Bacteroidia	o__Cytophagales	f__Microscillaceae	g__norank_f__Microscillaceae	s__uncultured_bacterium_g__norank_f__Microscillaceae	OTU1544	0	1	1	0	1	5	0	0	1	0	3	1	0	3	5	0	0	1	0	3	0	5	0	0	6	1	1	38
d__Bacteria	k__norank_d__Bacteria	p__Bacteroidetes	c__Bacteroidia	o__Cytophagales	f__Microscillaceae	g__norank_f__Microscillaceae	s__unclassified_g__norank_f__Microscillaceae	OTU3774	47	67	78	11	12	33	5	68	46	41	33	20	11	45	36	6	6	11	21	32	13	60	27	27	50	69	45	920
d__Bacteria	k__norank_d__Bacteria	p__Bacteroidetes	c__Bacteroidia	o__Cytophagales	f__Microscillaceae	g__norank_f__Microscillaceae	s__unclassified_g__norank_f__Microscillaceae	OTU1679	10	10	10	1	2	0	1	6	2	4	2	1	0	6	4	3	2	4	2	4	1	10	7	4	4	11	4	115
d__Bacteria	k__norank_d__Bacteria	p__Bacteroidetes	c__Bacteroidia	o__Cytophagales	f__Microscillaceae	g__norank_f__Microscillaceae	s__uncultured_Sphingobacteriales_bacterium_g__norank_f__Microscillaceae	OTU1100	23	44	9	12	25	19	4	18	32	15	29	41	8	26	73	11	12	2	8	9	1	22	29	35	21	45	11	584
d__Bacteria	k__norank_d__Bacteria	p__Bacteroidetes	c__Bacteroidia	o__Cytophagales	f__Microscillaceae	g__norank_f__Microscillaceae	s__unclassified_g__norank_f__Microscillaceae	OTU4631	0	0	0	2	0	3	1	0	0	1	0	0	1	0	0	0	0	23	0	0	1	5	0	0	0	0	3	40
d__Bacteria	k__norank_d__Bacteria	p__Bacteroidetes	c__Bacteroidia	o__Cytophagales	f__Microscillaceae	g__norank_f__Microscillaceae	s__unclassified_g__norank_f__Microscillaceae	OTU4	15	13	7	14	12	16	20	16	4	12	11	10	14	18	7	3	3	8	14	19	7	2	5	33	10	9	10	312
d__Bacteria	k__norank_d__Bacteria	p__Bacteroidetes	c__Bacteroidia	o__Cytophagales	f__Microscillaceae	g__norank_f__Microscillaceae	s__uncultured_Flammeovirgaceae_bacterium_g__norank	OTU233	0	2	0	0	3	0	0	2	6	3	3	8	1	0	12	2	1	0	0	2	1	2	0	0	1	3	0	52
d__Bacteria	k__norank_d__Bacteria	p__Bacteroidetes	c__Bacteroidia	o__Cytophagales	f__Microscillaceae	g__norank_f__Microscillaceae	s__unclassified_g__norank_f__Microscillaceae	OTU4604	0	0	0	0	0	0	4	0	1	0	0	0	2	0	1	0	0	12	2	0	1	9	0	0	1	0	0	33
d__Bacteria	k__norank_d__Bacteria	p__Bacteroidetes	c__Bacteroidia	o__Cytophagales	f__Microscillaceae	g__norank_f__Microscillaceae	s__metagenome_g__norank_f__Microscillaceae	OTU1482	7	10	21	17	5	10	21	38	17	34	1	4	7	4	4	1	3	9	6	5	10	35	1	12	11	2	12	307
d__Bacteria	k__norank_d__Bacteria	p__Bacteroidetes	c__Bacteroidia	o__Cytophagales	f__Microscillaceae	g__norank_f__Microscillaceae	s__unclassified_g__norank_f__Microscillaceae	OTU1033	0	1	1	0	0	3	3	3	4	2	2	0	2	3	2	1	0	2	9	1	0	9	7	1	1	13	8	78
d__Bacteria	k__norank_d__Bacteria	p__Bacteroidetes	c__Bacteroidia	o__Cytophagales	f__Microscillaceae	g__norank_f__Microscillaceae	s__unclassified_g__norank_f__Microscillaceae	OTU605	16	18	7	3	4	4	1	9	4	0	12	4	2	6	0	0	4	0	0	2	0	1	4	1	4	7	0	113
d__Bacteria	k__norank_d__Bacteria	p__Bacteroidetes	c__Bacteroidia	o__Cytophagales	f__Microscillaceae	g__norank_f__Microscillaceae	s__unclassified_g__norank_f__Microscillaceae	OTU1114	1	3	9	0	5	9	1	2	22	30	11	13	1	3	21	0	0	3	5	4	2	2	2	2	6	1	9	167
d__Bacteria	k__norank_d__Bacteria	p__Bacteroidetes	c__Bacteroidia	o__Cytophagales	f__Microscillaceae	g__norank_f__Microscillaceae	s__uncultured_bacterium_g__norank_f__Microscillaceae	OTU1096	0	2	1	2	5	2	0	3	3	3	13	9	0	6	13	0	1	2	2	3	0	1	3	3	11	15	6	109
d__Bacteria	k__norank_d__Bacteria	p__Bacteroidetes	c__Bacteroidia	o__Cytophagales	f__Microscillaceae	g__norank_f__Microscillaceae	s__uncultured_bacterium_g__norank_f__Microscillaceae	OTU2310	11	17	3	0	5	0	0	10	44	0	4	2	0	3	3	0	9	0	0	4	0	0	3	0	0	1	0	119
d__Bacteria	k__norank_d__Bacteria	p__Bacteroidetes	c__Bacteroidia	o__Cytophagales	f__Microscillaceae	g__norank_f__Microscillaceae	s__unclassified_g__norank_f__Microscillaceae	OTU2321	51	55	63	12	10	12	6	43	8	54	21	13	13	35	12	6	4	22	9	21	5	45	24	13	20	39	41	657
d__Bacteria	k__norank_d__Bacteria	p__Bacteroidetes	c__Bacteroidia	o__Cytophagales	f__Microscillaceae	g__norank_f__Microscillaceae	s__uncultured_bacterium_g__norank_f__Microscillaceae	OTU2301	16	34	10	2	7	3	2	11	26	7	18	2	0	18	1	3	1	0	1	13	0	0	8	3	6	9	3	204
d__Bacteria	k__norank_d__Bacteria	p__Bacteroidetes	c__Bacteroidia	o__Cytophagales	f__Microscillaceae	g__norank_f__Microscillaceae	s__metagenome_g__norank_f__Microscillaceae	OTU2247	2	2	5	1	2	3	4	7	1	1	0	1	0	1	5	0	0	1	1	1	4	5	0	3	2	1	5	58
d__Bacteria	k__norank_d__Bacteria	p__Proteobacteria	c__Alphaproteobacteria	o__Rickettsiales	f__Mitochondria	g__norank_f__Mitochondria	s__unclassified_g__norank_f__Mitochondria	OTU933	0	1	0	1	0	0	0	0	0	0	2	0	0	8	1	1	1	0	0	4	0	0	0	0	8	5	1	33
d__Bacteria	k__norank_d__Bacteria	p__Bacteroidetes	c__Bacteroidia	o__Bacteroidales	f__Muribaculaceae	g__norank_f__Muribaculaceae	s__uncultured_Bacteroidales_bacterium_g__norank_f__Muribaculaceae	OTU1758	7	1	2	0	0	0	0	0	0	0	0	0	1	0	0	2	0	3	5	0	0	0	3	0	0	1	0	25
d__Bacteria	k__norank_d__Bacteria	p__Bacteroidetes	c__Bacteroidia	o__Sphingobacteriales	f__NS11-12_marine_group	g__norank_f__NS11-12_marine_group	s__uncultured_bacterium_g__norank_f__NS11-12_marine_group	OTU1057	1	1	3	0	3	15	0	4	3	0	1	2	0	5	0	1	0	14	0	6	1	8	1	4	0	8	2	83
d__Bacteria	k__norank_d__Bacteria	p__Bacteroidetes	c__Bacteroidia	o__Sphingobacteriales	f__NS11-12_marine_group	g__norank_f__NS11-12_marine_group	s__metagenome_g__norank_f__NS11-12_marine_group	OTU1547	1	0	0	0	1	3	1	9	4	2	2	7	2	6	1	1	0	5	21	6	2	12	8	2	4	5	1	106
d__Bacteria	k__norank_d__Bacteria	p__Bacteroidetes	c__Bacteroidia	o__Sphingobacteriales	f__NS11-12_marine_group	g__norank_f__NS11-12_marine_group	s__uncultured_Bacteroidetes_bacterium_g__norank_f__NS11-12_marine_group	OTU1178	3	4	1	3	3	1	1	1	0	0	5	0	1	5	1	6	1	0	0	1	0	2	0	3	6	8	0	56
d__Bacteria	k__norank_d__Bacteria	p__Bacteroidetes	c__Bacteroidia	o__Sphingobacteriales	f__NS11-12_marine_group	g__norank_f__NS11-12_marine_group	s__unclassified_g__norank_f__NS11-12_marine_group	OTU2452	6	1	0	0	6	5	0	2	2	1	6	4	0	4	3	1	3	1	0	4	0	3	5	3	1	5	2	68
d__Bacteria	k__norank_d__Bacteria	p__Bacteroidetes	c__Bacteroidia	o__Sphingobacteriales	f__NS11-12_marine_group	g__norank_f__NS11-12_marine_group	s__unclassified_g__norank_f__NS11-12_marine_group	OTU91	0	0	3	0	2	6	18	3	5	63	0	1	2	0	5	15	1	11	4	1	3	4	4	21	0	0	0	172
d__Bacteria	k__norank_d__Bacteria	p__Bacteroidetes	c__Bacteroidia	o__Sphingobacteriales	f__NS11-12_marine_group	g__norank_f__NS11-12_marine_group	s__uncultured_bacterium_g__norank_f__NS11-12_marine_group	OTU836	7	12	8	0	3	4	1	6	6	3	16	7	1	9	3	0	0	3	5	7	1	9	8	4	13	6	7	149
d__Bacteria	k__norank_d__Bacteria	p__Bacteroidetes	c__Bacteroidia	o__Sphingobacteriales	f__NS11-12_marine_group	g__norank_f__NS11-12_marine_group	s__uncultured_bacterium_g__norank_f__NS11-12_marine_group	OTU581	0	2	0	0	4	5	0	4	6	2	4	1	0	9	0	2	2	6	3	3	4	2	4	1	2	8	3	77
d__Bacteria	k__norank_d__Bacteria	p__Bacteroidetes	c__Bacteroidia	o__Sphingobacteriales	f__NS11-12_marine_group	g__norank_f__NS11-12_marine_group	s__uncultured_Bacteroidetes_bacterium_g__norank_f__NS11-12_marine_group	OTU3166	2	1	1	0	6	17	3	7	8	10	9	6	0	10	3	11	1	14	17	9	4	10	12	3	4	14	6	188
d__Bacteria	k__norank_d__Bacteria	p__Bacteroidetes	c__Bacteroidia	o__Flavobacteriales	f__NS9_marine_group	g__norank_f__NS9_marine_group	s__metagenome_g__norank_f__NS9_marine_group	OTU1428	11	6	57	19	13	25	15	74	0	58	4	3	116	23	4	1	1	10	3	12	26	0	18	44	5	98	177	823
d__Bacteria	k__norank_d__Bacteria	p__Bacteroidetes	c__Bacteroidia	o__Flavobacteriales	f__NS9_marine_group	g__norank_f__NS9_marine_group	s__unclassified_g__norank_f__NS9_marine_group	OTU811	1	1	0	1	0	7	0	0	8	1	0	3	2	3	3	0	0	0	0	0	0	5	0	2	4	1	1	43
d__Bacteria	k__norank_d__Bacteria	p__Bacteroidetes	c__Bacteroidia	o__Flavobacteriales	f__NS9_marine_group	g__norank_f__NS9_marine_group	s__metagenome_g__norank_f__NS9_marine_group	OTU825	2	9	2	2	0	2	2	4	2	1	2	3	1	2	7	0	0	1	6	2	3	7	1	0	4	2	5	72
d__Bacteria	k__norank_d__Bacteria	p__Proteobacteria	c__Deltaproteobacteria	o__Myxococcales	f__Nannocystaceae	g__norank_f__Nannocystaceae	s__unclassified_g__norank_f__Nannocystaceae	OTU884	4	13	0	0	13	5	1	0	1	3	51	19	2	9	11	7	6	6	2	8	0	6	9	13	14	2	2	207
d__Bacteria	k__norank_d__Bacteria	p__Proteobacteria	c__Deltaproteobacteria	o__Myxococcales	f__Nannocystaceae	g__norank_f__Nannocystaceae	s__unclassified_g__norank_f__Nannocystaceae	OTU1863	9	12	0	0	0	0	0	2	0	0	8	0	0	0	1	4	6	1	0	5	0	0	5	0	1	1	0	55
d__Bacteria	k__norank_d__Bacteria	p__Proteobacteria	c__Deltaproteobacteria	o__Myxococcales	f__Nannocystaceae	g__norank_f__Nannocystaceae	s__metagenome_g__norank_f__Nannocystaceae	OTU4042	8	20	5	2	20	3	3	3	6	11	38	38	6	38	26	10	7	16	3	14	1	20	20	23	58	5	2	406
d__Bacteria	k__norank_d__Bacteria	p__Proteobacteria	c__Gammaproteobacteria	o__Betaproteobacteriales	f__Nitrosomonadaceae	g__norank_f__Nitrosomonadaceae	s__uncultured_beta_proteobacterium_g__norank_f__Nitrosomonadaceae	OTU4352	2	2	2	0	2	3	0	0	0	0	0	1	0	3	0	162	35	0	0	2	0	8	1	0	1	0	8	232
d__Bacteria	k__norank_d__Bacteria	p__Verrucomicrobia	c__Verrucomicrobiae	o__Opitutales	f__Opitutaceae	g__norank_f__Opitutaceae	s__unclassified_g__norank_f__Opitutaceae	OTU673	0	0	0	0	0	0	4	22	0	3	17	1	5	2	1	0	0	0	12	4	5	5	2	0	2	6	4	95
d__Bacteria	k__norank_d__Bacteria	p__Proteobacteria	c__Deltaproteobacteria	o__Myxococcales	f__P3OB-42	g__norank_f__P3OB-42	s__unclassified_g__norank_f__P3OB-42	OTU466	2	10	0	1	2	0	0	2	0	0	2	0	0	2	2	0	2	0	0	0	0	4	1	3	0	1	0	34
d__Bacteria	k__norank_d__Bacteria	p__Bacteroidetes	c__Ignavibacteria	o__Ignavibacteriales	f__PHOS-HE36	g__norank_f__PHOS-HE36	s__unclassified_g__norank_f__PHOS-HE36	OTU3516	2	11	3	0	1	3	1	1	22	0	6	5	0	16	9	1	5	2	1	23	0	13	11	2	11	16	1	166
d__Bacteria	k__norank_d__Bacteria	p__Planctomycetes	c__Phycisphaerae	o__Phycisphaerales	f__Phycisphaeraceae	g__norank_f__Phycisphaeraceae	s__uncultured_deep-sea_bacterium_g__norank_f__Phycisphaeraceae	OTU3286	6	5	0	1	6	0	1	1	2	4	4	6	3	11	0	0	2	1	2	7	0	2	1	3	10	3	2	83
d__Bacteria	k__norank_d__Bacteria	p__Planctomycetes	c__Phycisphaerae	o__Phycisphaerales	f__Phycisphaeraceae	g__norank_f__Phycisphaeraceae	s__uncultured_deep-sea_bacterium_g__norank_f__Phycisphaeraceae	OTU520	4	10	0	0	0	0	0	1	5	1	2	4	0	4	11	0	3	0	0	5	0	0	1	2	6	1	3	63
d__Bacteria	k__norank_d__Bacteria	p__Planctomycetes	c__Phycisphaerae	o__Phycisphaerales	f__Phycisphaeraceae	g__norank_f__Phycisphaeraceae	s__uncultured_planctomycete_g__norank_f__Phycisphaeraceae	OTU3283	4	4	0	0	4	1	0	0	2	1	3	2	0	2	6	0	0	0	1	1	0	1	0	4	2	2	1	41
d__Bacteria	k__norank_d__Bacteria	p__Planctomycetes	c__Phycisphaerae	o__Phycisphaerales	f__Phycisphaeraceae	g__norank_f__Phycisphaeraceae	s__unclassified_g__norank_f__Phycisphaeraceae	OTU3962	3	6	1	1	1	0	0	2	1	1	2	2	0	4	0	0	0	0	1	2	0	1	1	3	3	1	4	40
d__Bacteria	k__norank_d__Bacteria	p__Planctomycetes	c__Phycisphaerae	o__Phycisphaerales	f__Phycisphaeraceae	g__norank_f__Phycisphaeraceae	s__metagenome_g__norank_f__Phycisphaeraceae	OTU3410	6	10	1	0	3	0	1	0	2	0	6	6	0	4	1	0	1	1	0	5	0	4	3	5	12	0	1	72
d__Bacteria	k__norank_d__Bacteria	p__Planctomycetes	c__Planctomycetacia	o__Pirellulales	f__Pirellulaceae	g__norank_f__Pirellulaceae	s__unclassified_g__norank_f__Pirellulaceae	OTU1262	2	2	0	0	2	0	1	0	3	0	7	4	0	4	3	1	3	0	0	2	0	1	3	0	6	1	1	46
d__Bacteria	k__norank_d__Bacteria	p__Planctomycetes	c__Planctomycetacia	o__Pirellulales	f__Pirellulaceae	g__norank_f__Pirellulaceae	s__uncultured_bacterium_g__norank_f__Pirellulaceae	OTU3102	4	8	3	1	8	9	0	1	12	2	2	5	4	3	21	6	27	1	2	4	2	7	3	4	5	1	4	149
d__Bacteria	k__norank_d__Bacteria	p__Planctomycetes	c__Planctomycetacia	o__Pirellulales	f__Pirellulaceae	g__norank_f__Pirellulaceae	s__uncultured_Planctomycetaceae_bacterium_g__norank_f__Pirellulaceae	OTU1204	10	11	16	7	9	10	13	6	12	8	6	11	15	9	17	15	14	36	24	10	9	32	6	5	43	8	17	379
d__Bacteria	k__norank_d__Bacteria	p__Planctomycetes	c__Planctomycetacia	o__Pirellulales	f__Pirellulaceae	g__norank_f__Pirellulaceae	s__unclassified_g__norank_f__Pirellulaceae	OTU646	1	18	2	0	6	0	1	0	3	1	6	8	0	12	3	0	5	1	0	6	0	2	2	4	1	0	0	82
d__Bacteria	k__norank_d__Bacteria	p__Planctomycetes	c__Planctomycetacia	o__Pirellulales	f__Pirellulaceae	g__norank_f__Pirellulaceae	s__uncultured_Planctomycetaceae_bacterium_g__norank_f__Pirellulaceae	OTU3076	39	49	41	9	18	24	21	10	38	36	44	25	28	54	66	24	37	66	17	33	9	64	31	33	82	31	31	960
d__Bacteria	k__norank_d__Bacteria	p__Planctomycetes	c__Planctomycetacia	o__Pirellulales	f__Pirellulaceae	g__norank_f__Pirellulaceae	s__metagenome_g__norank_f__Pirellulaceae	OTU483	3	3	2	0	4	1	0	2	2	0	2	2	0	2	2	2	0	0	1	1	0	4	0	3	5	0	0	41
d__Bacteria	k__norank_d__Bacteria	p__Planctomycetes	c__Planctomycetacia	o__Pirellulales	f__Pirellulaceae	g__norank_f__Pirellulaceae	s__uncultured_Pasteuria_sp._g__norank	OTU3896	14	14	5	1	13	3	0	1	9	1	12	8	2	11	12	10	22	12	4	5	0	5	3	5	14	7	4	197
d__Bacteria	k__norank_d__Bacteria	p__Planctomycetes	c__Planctomycetacia	o__Pirellulales	f__Pirellulaceae	g__norank_f__Pirellulaceae	s__unclassified_g__norank_f__Pirellulaceae	OTU1933	3	2	4	0	0	3	0	1	8	1	1	3	1	6	2	2	5	3	2	0	0	2	3	2	3	2	1	60
d__Bacteria	k__norank_d__Bacteria	p__Planctomycetes	c__Planctomycetacia	o__Pirellulales	f__Pirellulaceae	g__norank_f__Pirellulaceae	s__unclassified_g__norank_f__Pirellulaceae	OTU2735	1	2	8	3	2	1	3	0	1	7	5	8	8	7	2	2	0	13	9	3	3	6	1	3	10	6	5	119
d__Bacteria	k__norank_d__Bacteria	p__Planctomycetes	c__Planctomycetacia	o__Pirellulales	f__Pirellulaceae	g__norank_f__Pirellulaceae	s__uncultured_compost_bacterium_g__norank_f__Pirellulaceae	OTU3847	6	11	5	2	5	1	3	2	1	3	0	5	2	0	6	1	0	3	1	3	0	2	0	4	8	7	0	81
d__Bacteria	k__norank_d__Bacteria	p__Planctomycetes	c__Planctomycetacia	o__Pirellulales	f__Pirellulaceae	g__norank_f__Pirellulaceae	s__uncultured_sludge_bacterium_A40	OTU3372	3	2	0	1	1	3	4	0	1	3	4	2	0	0	12	0	2	3	2	1	1	9	2	2	12	0	1	71
d__Bacteria	k__norank_d__Bacteria	p__Planctomycetes	c__Planctomycetacia	o__Pirellulales	f__Pirellulaceae	g__norank_f__Pirellulaceae	s__uncultured_bacterium_g__norank_f__Pirellulaceae	OTU3967	1	1	0	0	5	0	0	0	2	0	1	1	0	0	2	1	0	0	1	1	2	2	1	0	8	0	1	30
d__Bacteria	k__norank_d__Bacteria	p__Planctomycetes	c__Planctomycetacia	o__Pirellulales	f__Pirellulaceae	g__norank_f__Pirellulaceae	s__unclassified_g__norank_f__Pirellulaceae	OTU2868	1	3	2	0	1	1	1	0	5	3	3	2	2	1	4	2	0	1	1	3	0	2	4	0	16	4	2	64
d__Bacteria	k__norank_d__Bacteria	p__Proteobacteria	c__Alphaproteobacteria	o__Reyranellales	f__Reyranellaceae	g__norank_f__Reyranellaceae	s__metagenome_g__norank_f__Reyranellaceae	OTU2120	1	0	0	0	0	0	8	0	0	2	1	0	3	0	0	0	0	4	10	0	5	15	0	0	21	0	2	72
d__Bacteria	k__norank_d__Bacteria	p__Proteobacteria	c__Alphaproteobacteria	o__Reyranellales	f__Reyranellaceae	g__norank_f__Reyranellaceae	s__uncultured_Rhodospirillales_bacterium_g__norank	OTU4455	2	8	0	0	7	0	5	0	0	2	11	7	0	11	0	1	2	2	0	2	2	3	3	2	8	5	0	83
d__Bacteria	k__norank_d__Bacteria	p__Proteobacteria	c__Alphaproteobacteria	o__Reyranellales	f__Reyranellaceae	g__norank_f__Reyranellaceae	s__unclassified_g__norank_f__Reyranellaceae	OTU2655	7	18	5	2	25	7	3	3	21	3	37	30	1	13	100	3	5	4	3	12	3	14	14	12	44	12	12	413
d__Bacteria	k__norank_d__Bacteria	p__Proteobacteria	c__Alphaproteobacteria	o__Reyranellales	f__Reyranellaceae	g__norank_f__Reyranellaceae	s__uncultured_bacterium_g__norank_f__Reyranellaceae	OTU4320	5	15	4	0	7	1	1	4	5	5	3	2	0	9	7	10	31	1	0	2	2	2	2	1	2	6	12	139
d__Bacteria	k__norank_d__Bacteria	p__Proteobacteria	c__Alphaproteobacteria	o__Rhizobiales	f__Rhizobiales_Incertae_Sedis	g__norank_f__Rhizobiales_Incertae_Sedis	s__metagenome_g__norank_f__Rhizobiales_Incertae_Sedis	OTU3562	0	0	1	0	2	1	3	0	2	1	1	0	0	1	5	1	1	11	0	0	0	1	2	4	3	0	0	40
d__Bacteria	k__norank_d__Bacteria	p__Proteobacteria	c__Gammaproteobacteria	o__Xanthomonadales	f__Rhodanobacteraceae	g__norank_f__Rhodanobacteraceae	s__unclassified_g__norank_f__Rhodanobacteraceae	OTU584	0	3	1	2	4	4	1	31	17	4	3	3	0	0	9	3	4	0	3	2	0	2	3	2	0	7	6	114
d__Bacteria	k__norank_d__Bacteria	p__Proteobacteria	c__Gammaproteobacteria	o__Xanthomonadales	f__Rhodanobacteraceae	g__norank_f__Rhodanobacteraceae	s__unclassified_g__norank_f__Rhodanobacteraceae	OTU2718	1	0	2	0	0	3	5	0	0	2	0	0	1	0	1	0	0	9	5	0	2	10	0	0	1	0	2	44
d__Bacteria	k__norank_d__Bacteria	p__Proteobacteria	c__Alphaproteobacteria	o__Rhodobacterales	f__Rhodobacteraceae	g__norank_f__Rhodobacteraceae	s__uncultured_organism_g__norank_f__Rhodobacteraceae	OTU1545	1	3	0	1	3	3	0	0	2	2	7	5	2	13	3	4	0	1	0	3	0	4	5	0	6	2	2	72
d__Bacteria	k__norank_d__Bacteria	p__Proteobacteria	c__Alphaproteobacteria	o__Rhodobacterales	f__Rhodobacteraceae	g__norank_f__Rhodobacteraceae	s__unclassified_g__norank_f__Rhodobacteraceae	OTU2303	1	1	0	0	0	0	0	0	0	0	2	9	0	6	0	1	0	1	0	8	0	2	2	0	2	3	0	38
d__Bacteria	k__norank_d__Bacteria	p__Proteobacteria	c__Alphaproteobacteria	o__Rhodospirillales	f__Rhodospirillaceae	g__norank_f__Rhodospirillaceae	s__uncultured_bacterium_g__norank_f__Rhodospirillaceae	OTU808	0	2	1	0	2	0	1	0	1	1	4	3	0	7	3	1	1	5	2	1	0	3	3	2	4	4	2	53
d__Bacteria	k__norank_d__Bacteria	p__Proteobacteria	c__Alphaproteobacteria	o__Rhodospirillales	f__Rhodospirillaceae	g__norank_f__Rhodospirillaceae	s__uncultured_bacterium_g__norank_f__Rhodospirillaceae	OTU2239	1	0	0	6	2	1	3	1	1	2	3	2	3	3	0	2	1	4	5	6	1	11	0	4	6	1	2	71
d__Bacteria	k__norank_d__Bacteria	p__Proteobacteria	c__Alphaproteobacteria	o__Rhodospirillales	f__Rhodospirillaceae	g__norank_f__Rhodospirillaceae	s__unclassified_g__norank_f__Rhodospirillaceae	OTU4147	7	7	2	0	6	3	2	0	1	2	9	3	1	7	1	3	0	11	0	6	3	10	3	3	7	1	2	100
d__Bacteria	k__norank_d__Bacteria	p__Bacteroidetes	c__Rhodothermia	o__Rhodothermales	f__Rhodothermaceae	g__norank_f__Rhodothermaceae	s__unclassified_g__norank_f__Rhodothermaceae	OTU4530	32	9	15	9	3	1	6	6	2	9	8	5	20	10	2	4	0	1	2	27	4	0	3	19	1	14	12	224
d__Bacteria	k__norank_d__Bacteria	p__Bacteroidetes	c__Rhodothermia	o__Rhodothermales	f__Rhodothermaceae	g__norank_f__Rhodothermaceae	s__uncultured_bacterium_g__norank_f__Rhodothermaceae	OTU186	4	9	5	2	3	6	1	3	6	10	6	2	4	6	6	0	2	0	4	1	0	9	5	5	13	6	5	123
d__Bacteria	k__norank_d__Bacteria	p__Bacteroidetes	c__Rhodothermia	o__Rhodothermales	f__Rhodothermaceae	g__norank_f__Rhodothermaceae	s__unclassified_g__norank_f__Rhodothermaceae	OTU3749	7	12	4	0	2	0	0	5	7	3	10	3	1	5	3	0	3	0	0	5	0	1	5	5	1	11	1	94
d__Bacteria	k__norank_d__Bacteria	p__Bacteroidetes	c__Rhodothermia	o__Rhodothermales	f__Rhodothermaceae	g__norank_f__Rhodothermaceae	s__metagenome_g__norank_f__Rhodothermaceae	OTU1790	2	3	1	1	3	5	0	4	4	0	4	0	0	2	1	0	1	0	0	4	1	0	2	1	0	6	1	46
d__Bacteria	k__norank_d__Bacteria	p__Chloroflexi	c__Chloroflexia	o__Chloroflexales	f__Roseiflexaceae	g__norank_f__Roseiflexaceae	s__uncultured_soil_bacterium_g__norank_f__Roseiflexaceae	OTU2383	3	4	0	0	1	0	0	0	1	0	5	7	0	3	3	0	1	2	0	2	0	4	0	0	3	0	1	40
d__Bacteria	k__norank_d__Bacteria	p__Chloroflexi	c__Chloroflexia	o__Chloroflexales	f__Roseiflexaceae	g__norank_f__Roseiflexaceae	s__uncultured_Chloroflexaceae_bacterium_g__norank	OTU3137	3	4	1	0	2	1	0	0	1	1	1	4	0	2	4	10	2	1	0	2	0	5	4	2	8	0	1	59
d__Bacteria	k__norank_d__Bacteria	p__Chloroflexi	c__Chloroflexia	o__Chloroflexales	f__Roseiflexaceae	g__norank_f__Roseiflexaceae	s__unclassified_g__norank_f__Roseiflexaceae	OTU766	2	0	0	1	2	0	0	0	2	0	1	3	1	4	0	0	1	4	0	0	0	2	1	1	4	0	0	29
d__Bacteria	k__norank_d__Bacteria	p__Chloroflexi	c__Chloroflexia	o__Chloroflexales	f__Roseiflexaceae	g__norank_f__Roseiflexaceae	s__uncultured_bacterium_g__norank_f__Roseiflexaceae	OTU470	12	24	11	9	11	23	3	3	5	13	24	14	8	19	16	9	5	14	8	8	2	16	24	9	15	13	9	327
d__Bacteria	k__norank_d__Bacteria	p__Chloroflexi	c__Chloroflexia	o__Chloroflexales	f__Roseiflexaceae	g__norank_f__Roseiflexaceae	s__uncultured_bacterium_g__norank_f__Roseiflexaceae	OTU2646	4	2	1	4	2	0	0	1	1	3	5	4	0	7	2	3	0	1	2	3	2	9	1	2	12	5	0	76
d__Bacteria	k__norank_d__Bacteria	p__Chloroflexi	c__Chloroflexia	o__Chloroflexales	f__Roseiflexaceae	g__norank_f__Roseiflexaceae	s__uncultured_bacterium_g__norank_f__Roseiflexaceae	OTU1039	0	0	0	0	1	0	0	0	0	0	1	1	0	3	3	0	1	0	0	0	0	2	1	1	3	0	0	17
d__Bacteria	k__norank_d__Bacteria	p__Chloroflexi	c__Chloroflexia	o__Chloroflexales	f__Roseiflexaceae	g__norank_f__Roseiflexaceae	s__uncultured_bacterium_g__norank_f__Roseiflexaceae	OTU3541	1	9	1	0	6	2	0	0	2	0	6	2	1	8	1	1	5	2	0	1	0	6	1	3	6	3	3	70
d__Bacteria	k__norank_d__Bacteria	p__Chloroflexi	c__Chloroflexia	o__Chloroflexales	f__Roseiflexaceae	g__norank_f__Roseiflexaceae	s__uncultured_bacterium_g__norank_f__Roseiflexaceae	OTU527	2	4	1	0	1	0	1	0	2	0	4	1	0	1	0	5	2	0	1	1	0	1	3	2	0	0	0	32
d__Bacteria	k__norank_d__Bacteria	p__Chloroflexi	c__Chloroflexia	o__Chloroflexales	f__Roseiflexaceae	g__norank_f__Roseiflexaceae	s__uncultured_bacterium_g__norank_f__Roseiflexaceae	OTU1365	1	6	0	1	7	1	2	0	1	2	8	7	1	2	1	18	7	0	0	4	0	3	4	3	3	2	3	87
d__Bacteria	k__norank_d__Bacteria	p__Bacteroidetes	c__Bacteroidia	o__Sphingobacteriales	f__S15-21	g__norank_f__S15-21	s__uncultured_bacterium_g__norank_f__S15-21	OTU2295	12	54	4	2	20	3	2	24	29	5	22	12	0	20	20	0	6	2	5	13	0	2	9	13	6	22	9	316
d__Bacteria	k__norank_d__Bacteria	p__Proteobacteria	c__Gammaproteobacteria	o__Betaproteobacteriales	f__SC-I-84	g__norank_f__SC-I-84	s__uncultured_bacterium_g__norank_f__SC-I-84	OTU2176	4	6	8	1	11	5	2	2	4	1	7	11	1	9	11	3	2	13	4	12	3	6	7	9	15	6	8	171
d__Bacteria	k__norank_d__Bacteria	p__Proteobacteria	c__Gammaproteobacteria	o__Betaproteobacteriales	f__SC-I-84	g__norank_f__SC-I-84	s__unclassified_g__norank_f__SC-I-84	OTU2628	0	1	5	1	1	1	8	1	3	3	0	2	1	2	1	2	0	13	6	6	3	17	3	4	11	0	3	98
d__Bacteria	k__norank_d__Bacteria	p__Proteobacteria	c__Gammaproteobacteria	o__Betaproteobacteriales	f__SC-I-84	g__norank_f__SC-I-84	s__unclassified_g__norank_f__SC-I-84	OTU48	1	1	1	6	0	0	13	0	0	1	0	0	1	1	1	5	0	10	4	0	1	3	0	2	1	0	0	52
d__Bacteria	k__norank_d__Bacteria	p__Proteobacteria	c__Gammaproteobacteria	o__Betaproteobacteriales	f__SC-I-84	g__norank_f__SC-I-84	s__uncultured_beta_proteobacterium_g__norank_f__SC-I-84	OTU2607	3	1	13	2	4	13	22	2	8	4	4	11	6	2	19	7	1	29	9	3	7	25	4	13	22	3	4	241
d__Bacteria	k__norank_d__Bacteria	p__Proteobacteria	c__Gammaproteobacteria	o__Betaproteobacteriales	f__SC-I-84	g__norank_f__SC-I-84	s__unclassified_g__norank_f__SC-I-84	OTU1072	3	1	4	1	1	10	8	0	2	2	7	2	0	3	12	1	2	15	6	1	6	11	1	5	15	1	2	122
d__Bacteria	k__norank_d__Bacteria	p__Proteobacteria	c__Gammaproteobacteria	o__Betaproteobacteriales	f__SC-I-84	g__norank_f__SC-I-84	s__uncultured_beta_proteobacterium_g__norank_f__SC-I-84	OTU44	0	1	3	1	1	0	4	0	5	2	0	3	1	3	0	0	0	0	1	3	3	3	0	2	3	3	1	43
d__Bacteria	k__norank_d__Bacteria	p__Proteobacteria	c__Gammaproteobacteria	o__Betaproteobacteriales	f__SC-I-84	g__norank_f__SC-I-84	s__uncultured_beta_proteobacterium_g__norank_f__SC-I-84	OTU426	3	2	5	0	0	6	0	0	2	2	2	6	0	2	2	2	0	7	1	0	1	4	1	0	3	2	3	56
d__Bacteria	k__norank_d__Bacteria	p__Proteobacteria	c__Gammaproteobacteria	o__Betaproteobacteriales	f__SC-I-84	g__norank_f__SC-I-84	s__unclassified_g__norank_f__SC-I-84	OTU1489	1	0	0	0	0	1	2	0	4	0	0	1	0	0	1	9	0	1	3	0	3	5	0	4	3	1	1	40
d__Bacteria	k__norank_d__Bacteria	p__Proteobacteria	c__Gammaproteobacteria	o__Betaproteobacteriales	f__SC-I-84	g__norank_f__SC-I-84	s__unclassified_g__norank_f__SC-I-84	OTU2248	0	1	2	0	3	2	1	0	2	1	7	4	0	1	5	1	3	1	0	1	0	2	2	2	2	2	2	47
d__Bacteria	k__norank_d__Bacteria	p__Proteobacteria	c__Gammaproteobacteria	o__Betaproteobacteriales	f__SC-I-84	g__norank_f__SC-I-84	s__uncultured_soil_bacterium_g__norank_f__SC-I-84	OTU2155	1	0	13	1	2	3	2	0	4	2	1	4	0	2	3	1	2	4	2	0	0	4	0	2	7	0	4	64
d__Bacteria	k__norank_d__Bacteria	p__Proteobacteria	c__Gammaproteobacteria	o__Betaproteobacteriales	f__SC-I-84	g__norank_f__SC-I-84	s__unclassified_g__norank_f__SC-I-84	OTU4498	8	9	12	0	7	10	2	5	8	3	8	12	0	9	15	3	6	5	1	19	2	9	9	10	6	6	8	192
d__Bacteria	k__norank_d__Bacteria	p__Proteobacteria	c__Gammaproteobacteria	o__Betaproteobacteriales	f__SC-I-84	g__norank_f__SC-I-84	s__uncultured_Burkholderiales_bacterium_g__norank_f__SC-I-84	OTU2181	112	102	112	62	176	110	108	73	93	103	239	254	55	204	135	55	32	319	100	243	81	212	170	205	248	114	121	3838
d__Bacteria	k__norank_d__Bacteria	p__Proteobacteria	c__Deltaproteobacteria	o__Myxococcales	f__Sandaracinaceae	g__norank_f__Sandaracinaceae	s__uncultured_bacterium_g__norank_f__Sandaracinaceae	OTU3874	0	0	0	0	0	0	0	0	0	1	0	0	0	2	5	0	0	0	4	0	0	5	2	0	5	0	2	26
d__Bacteria	k__norank_d__Bacteria	p__Proteobacteria	c__Deltaproteobacteria	o__Myxococcales	f__Sandaracinaceae	g__norank_f__Sandaracinaceae	s__uncultured_bacterium_g__norank_f__Sandaracinaceae	OTU2937	0	1	0	0	5	0	0	1	3	0	12	9	0	3	17	0	1	1	1	0	0	2	10	4	14	10	0	94
d__Bacteria	k__norank_d__Bacteria	p__Proteobacteria	c__Deltaproteobacteria	o__Myxococcales	f__Sandaracinaceae	g__norank_f__Sandaracinaceae	s__uncultured_bacterium_g__norank_f__Sandaracinaceae	OTU2685	3	2	2	0	0	0	0	0	1	0	10	6	0	7	1	3	0	2	1	4	1	6	5	0	1	5	0	60
d__Bacteria	k__norank_d__Bacteria	p__Proteobacteria	c__Deltaproteobacteria	o__Myxococcales	f__Sandaracinaceae	g__norank_f__Sandaracinaceae	s__unclassified_g__norank_f__Sandaracinaceae	OTU3134	2	2	0	1	1	3	1	1	0	2	1	1	2	6	0	0	1	1	3	9	0	6	6	3	3	1	7	63
d__Bacteria	k__norank_d__Bacteria	p__Proteobacteria	c__Deltaproteobacteria	o__Myxococcales	f__Sandaracinaceae	g__norank_f__Sandaracinaceae	s__metagenome_g__norank_f__Sandaracinaceae	OTU2985	5	7	3	0	5	0	1	0	0	3	6	3	0	9	3	1	1	3	0	2	0	8	2	1	9	1	3	76
d__Bacteria	k__norank_d__Bacteria	p__Proteobacteria	c__Deltaproteobacteria	o__Myxococcales	f__Sandaracinaceae	g__norank_f__Sandaracinaceae	s__unclassified_g__norank_f__Sandaracinaceae	OTU2972	8	34	2	1	1	0	0	0	0	0	5	1	0	2	1	5	2	1	0	0	0	3	5	1	2	0	1	75
d__Bacteria	k__norank_d__Bacteria	p__Proteobacteria	c__Deltaproteobacteria	o__Myxococcales	f__Sandaracinaceae	g__norank_f__Sandaracinaceae	s__uncultured_soil_bacterium_g__norank_f__Sandaracinaceae	OTU538	2	10	3	0	6	1	3	0	0	0	6	2	1	2	1	3	1	2	1	1	0	1	0	1	3	1	0	51
d__Bacteria	k__norank_d__Bacteria	p__Proteobacteria	c__Deltaproteobacteria	o__Myxococcales	f__Sandaracinaceae	g__norank_f__Sandaracinaceae	s__uncultured_Polyangiaceae_bacterium_g__norank_f__Sandaracinaceae	OTU3469	7	5	3	1	2	0	0	1	0	1	5	3	2	10	6	0	4	1	0	2	0	1	6	16	6	2	3	87
d__Bacteria	k__norank_d__Bacteria	p__Bacteroidetes	c__Bacteroidia	o__Chitinophagales	f__Saprospiraceae	g__norank_f__Saprospiraceae	s__unclassified_g__norank_f__Saprospiraceae	OTU1733	159	174	212	128	86	73	217	289	267	196	185	183	79	311	291	40	32	64	154	228	105	274	200	147	317	372	256	5039
d__Bacteria	k__norank_d__Bacteria	p__Bacteroidetes	c__Bacteroidia	o__Chitinophagales	f__Saprospiraceae	g__norank_f__Saprospiraceae	s__uncultured_Bacteroidetes_bacterium_g__norank_f__Saprospiraceae	OTU4438	3	6	3	1	15	6	0	70	72	5	4	15	0	22	30	7	22	0	1	16	1	8	9	1	3	17	21	358
d__Bacteria	k__norank_d__Bacteria	p__Bacteroidetes	c__Bacteroidia	o__Chitinophagales	f__Saprospiraceae	g__norank_f__Saprospiraceae	s__unclassified_g__norank_f__Saprospiraceae	OTU210	2	12	4	1	1	0	0	7	30	5	7	7	0	13	9	0	3	0	2	11	1	0	3	8	0	16	3	145
d__Bacteria	k__norank_d__Bacteria	p__Bacteroidetes	c__Bacteroidia	o__Chitinophagales	f__Saprospiraceae	g__norank_f__Saprospiraceae	s__wastewater_metagenome_g__norank_f__Saprospiraceae	OTU2816	2	0	0	3	1	6	1	24	11	0	2	3	0	3	2	2	2	0	3	0	0	10	0	0	2	0	5	82
d__Bacteria	k__norank_d__Bacteria	p__Bacteroidetes	c__Bacteroidia	o__Chitinophagales	f__Saprospiraceae	g__norank_f__Saprospiraceae	s__unclassified_g__norank_f__Saprospiraceae	OTU790	6	7	4	1	7	0	2	2	30	4	0	15	2	4	30	2	6	1	1	2	2	10	2	5	20	13	5	183
d__Bacteria	k__norank_d__Bacteria	p__Bacteroidetes	c__Bacteroidia	o__Chitinophagales	f__Saprospiraceae	g__norank_f__Saprospiraceae	s__uncultured_Haliscomenobacter_sp._g__norank	OTU1723	2	8	1	2	4	5	2	1	24	1	3	10	1	1	57	2	1	0	2	1	1	8	1	1	8	12	6	165
d__Bacteria	k__norank_d__Bacteria	p__Bacteroidetes	c__Bacteroidia	o__Chitinophagales	f__Saprospiraceae	g__norank_f__Saprospiraceae	s__uncultured_Haliscomenobacter_sp._g__norank	OTU3499	21	65	18	7	7	2	1	10	8	14	4	9	1	6	11	0	2	2	2	9	1	3	3	33	0	31	22	292
d__Bacteria	k__norank_d__Bacteria	p__Bacteroidetes	c__Bacteroidia	o__Chitinophagales	f__Saprospiraceae	g__norank_f__Saprospiraceae	s__unclassified_g__norank_f__Saprospiraceae	OTU1343	0	4	0	1	8	0	1	8	11	0	4	1	0	4	18	0	0	1	0	1	2	7	3	2	2	13	0	91
d__Bacteria	k__norank_d__Bacteria	p__Bacteroidetes	c__Bacteroidia	o__Chitinophagales	f__Saprospiraceae	g__norank_f__Saprospiraceae	s__uncultured_Haliscomenobacter_sp._g__norank	OTU959	13	29	8	2	41	2	0	45	26	5	43	43	0	60	41	2	14	0	5	14	0	1	16	10	1	50	5	476
d__Bacteria	k__norank_d__Bacteria	p__Bacteroidetes	c__Bacteroidia	o__Sphingobacteriales	f__Sphingobacteriaceae	g__norank_f__Sphingobacteriaceae	s__uncultured_bacterium_g__norank_f__Sphingobacteriaceae	OTU2459	1	0	1	6	11	3	2	1	1	1	0	1	4	0	0	4	0	0	6	2	0	0	0	0	0	1	0	45
d__Bacteria	k__norank_d__Bacteria	p__Actinobacteria	c__Actinobacteria	o__Frankiales	f__Sporichthyaceae	g__norank_f__Sporichthyaceae	s__unclassified_g__norank_f__Sporichthyaceae	OTU3235	6	7	0	0	7	0	1	1	1	0	21	11	4	5	2	8	6	12	0	13	0	4	7	7	12	0	1	136
d__Bacteria	k__norank_d__Bacteria	p__Proteobacteria	c__Gammaproteobacteria	o__Steroidobacterales	f__Steroidobacteraceae	g__norank_f__Steroidobacteraceae	s__metagenome_g__norank_f__Steroidobacteraceae	OTU3820	20	112	27	3	18	1	3	5	3	1	12	13	2	7	22	1	10	6	0	7	4	13	7	16	17	5	6	341
d__Bacteria	k__norank_d__Bacteria	p__Proteobacteria	c__Gammaproteobacteria	o__Steroidobacterales	f__Steroidobacteraceae	g__norank_f__Steroidobacteraceae	s__uncultured_bacterium_g__norank_f__Steroidobacteraceae	OTU895	5	5	3	1	11	0	0	0	5	0	3	2	0	5	4	17	54	2	0	4	1	2	3	0	0	4	1	132
d__Bacteria	k__norank_d__Bacteria	p__Proteobacteria	c__Gammaproteobacteria	o__Steroidobacterales	f__Steroidobacteraceae	g__norank_f__Steroidobacteraceae	s__uncultured_gamma_proteobacterium_g__norank_f__Steroidobacteraceae	OTU3812	22	61	30	4	30	21	2	8	23	16	28	25	7	38	30	25	28	22	18	40	11	34	18	20	21	9	19	610
d__Bacteria	k__norank_d__Bacteria	p__Proteobacteria	c__Gammaproteobacteria	o__Steroidobacterales	f__Steroidobacteraceae	g__norank_f__Steroidobacteraceae	s__unclassified_g__norank_f__Steroidobacteraceae	OTU3814	15	20	19	10	28	12	16	6	20	16	56	41	11	30	20	11	12	41	14	31	7	42	14	20	55	30	18	615
d__Bacteria	k__norank_d__Bacteria	p__Proteobacteria	c__Deltaproteobacteria	o__Syntrophobacterales	f__Syntrophaceae	g__norank_f__Syntrophaceae	s__unclassified_g__norank_f__Syntrophaceae	OTU4027	1	1	2	0	2	5	0	1	2	0	1	1	0	0	2	6	2	2	0	3	0	3	2	2	1	1	4	44
d__Bacteria	k__norank_d__Bacteria	p__Proteobacteria	c__Deltaproteobacteria	o__Syntrophobacterales	f__Syntrophaceae	g__norank_f__Syntrophaceae	s__uncultured_delta_proteobacterium_g__norank_f__Syntrophaceae	OTU2873	7	6	4	0	3	0	0	0	3	3	3	2	2	5	5	1	7	1	1	6	1	7	3	2	3	3	4	82
d__Bacteria	k__norank_d__Bacteria	p__Proteobacteria	c__Gammaproteobacteria	o__Betaproteobacteriales	f__TRA3-20	g__norank_f__TRA3-20	s__uncultured_Thiobacillus_sp._g__norank_f__TRA3-20	OTU3905	2	3	1	0	1	1	10	4	0	3	1	2	5	7	0	2	0	11	1	16	10	1	3	4	1	7	32	128
d__Bacteria	k__norank_d__Bacteria	p__Proteobacteria	c__Gammaproteobacteria	o__Betaproteobacteriales	f__TRA3-20	g__norank_f__TRA3-20	s__uncultured_beta_proteobacterium_g__norank_f__TRA3-20	OTU2596	21	12	5	2	16	13	18	8	14	6	11	9	6	20	8	19	25	12	10	10	14	51	5	4	29	8	8	364
d__Bacteria	k__norank_d__Bacteria	p__Proteobacteria	c__Gammaproteobacteria	o__Betaproteobacteriales	f__TRA3-20	g__norank_f__TRA3-20	s__uncultured_beta_proteobacterium_g__norank_f__TRA3-20	OTU4324	64	19	19	1	60	9	2	6	21	5	36	23	4	51	26	1266	829	8	0	44	3	63	33	2	22	9	53	2678
d__Bacteria	k__norank_d__Bacteria	p__Proteobacteria	c__Gammaproteobacteria	o__Betaproteobacteriales	f__TRA3-20	g__norank_f__TRA3-20	s__uncultured_Oxalobacteraceae_bacterium_g__norank_f__TRA3-20	OTU2518	66	152	86	14	28	19	27	31	30	26	82	40	11	106	19	3	7	56	24	142	16	46	56	63	85	59	31	1325
d__Bacteria	k__norank_d__Bacteria	p__Proteobacteria	c__Gammaproteobacteria	o__Betaproteobacteriales	f__TRA3-20	g__norank_f__TRA3-20	s__bacterium_enrichment_culture_clone_Anammox_13	OTU3788	7	9	3	2	7	3	4	3	0	7	16	8	3	6	8	2	2	7	0	11	2	17	7	9	12	3	1	159
d__Bacteria	k__norank_d__Bacteria	p__Proteobacteria	c__Gammaproteobacteria	o__Betaproteobacteriales	f__TRA3-20	g__norank_f__TRA3-20	s__unclassified_g__norank_f__TRA3-20	OTU49	90	153	101	13	27	9	14	16	31	36	48	40	12	36	34	6	12	19	11	103	3	39	23	42	46	48	21	1033
d__Bacteria	k__norank_d__Bacteria	p__Dependentiae	c__Babeliae	o__Babeliales	f__Vermiphilaceae	g__norank_f__Vermiphilaceae	s__uncultured_bacterium_g__norank_f__Vermiphilaceae	OTU4305	2	1	4	0	0	0	0	0	0	2	0	0	1	0	0	19	12	1	1	2	0	0	0	1	0	0	4	50
d__Bacteria	k__norank_d__Bacteria	p__Dependentiae	c__Babeliae	o__Babeliales	f__Vermiphilaceae	g__norank_f__Vermiphilaceae	s__unclassified_g__norank_f__Vermiphilaceae	OTU2523	2	3	0	0	0	0	1	0	1	0	1	0	0	0	0	11	1	2	0	0	0	0	0	4	0	1	0	27
d__Bacteria	k__norank_d__Bacteria	p__Dependentiae	c__Babeliae	o__Babeliales	f__Vermiphilaceae	g__norank_f__Vermiphilaceae	s__uncultured_bacterium_g__norank_f__Vermiphilaceae	OTU3278	6	2	7	1	0	0	0	0	0	4	0	0	0	1	0	0	0	0	0	0	0	0	0	1	2	2	0	26
d__Bacteria	k__norank_d__Bacteria	p__Dependentiae	c__Babeliae	o__Babeliales	f__Vermiphilaceae	g__norank_f__Vermiphilaceae	s__uncultured_organism_g__norank_f__Vermiphilaceae	OTU3667	10	14	6	1	2	0	1	1	3	7	4	1	1	9	9	3	3	1	1	11	0	2	7	3	9	5	0	114
d__Bacteria	k__norank_d__Bacteria	p__Dependentiae	c__Babeliae	o__Babeliales	f__Vermiphilaceae	g__norank_f__Vermiphilaceae	s__uncultured_bacterium_g__norank_f__Vermiphilaceae	OTU4184	0	1	4	1	0	0	0	0	0	4	0	0	0	0	0	22	2	0	0	0	0	2	0	0	2	1	0	39
d__Bacteria	k__norank_d__Bacteria	p__Dependentiae	c__Babeliae	o__Babeliales	f__Vermiphilaceae	g__norank_f__Vermiphilaceae	s__uncultured_bacterium_g__norank_f__Vermiphilaceae	OTU3889	1	3	2	0	0	0	0	1	0	1	0	0	3	6	2	0	0	2	0	1	0	5	1	1	1	2	4	36
d__Bacteria	k__norank_d__Bacteria	p__Planctomycetes	c__Phycisphaerae	o__Tepidisphaerales	f__WD2101_soil_group	g__norank_f__WD2101_soil_group	s__uncultured_soil_bacterium_g__norank_f__WD2101_soil_group	OTU3288	9	15	8	1	4	12	3	2	5	10	15	8	5	2	12	3	9	9	12	7	0	7	3	12	12	10	5	200
d__Bacteria	k__norank_d__Bacteria	p__Planctomycetes	c__Phycisphaerae	o__Tepidisphaerales	f__WD2101_soil_group	g__norank_f__WD2101_soil_group	s__uncultured_soil_bacterium_g__norank_f__WD2101_soil_group	OTU302	0	1	2	2	3	3	1	1	3	8	0	1	1	2	3	0	1	5	0	2	2	5	1	2	3	4	0	56
d__Bacteria	k__norank_d__Bacteria	p__Planctomycetes	c__Phycisphaerae	o__Tepidisphaerales	f__WD2101_soil_group	g__norank_f__WD2101_soil_group	s__uncultured_bacterium_g__norank_f__WD2101_soil_group	OTU2886	3	2	2	2	4	3	0	3	2	1	3	1	2	3	3	3	6	4	1	4	0	3	1	3	3	2	2	66
d__Bacteria	k__norank_d__Bacteria	p__Planctomycetes	c__Phycisphaerae	o__Tepidisphaerales	f__WD2101_soil_group	g__norank_f__WD2101_soil_group	s__uncultured_bacterium_g__norank_f__WD2101_soil_group	OTU3311	2	2	2	0	2	4	1	1	4	0	2	2	1	0	3	0	0	0	5	1	0	3	2	1	5	4	4	51
d__Bacteria	k__norank_d__Bacteria	p__Planctomycetes	c__Phycisphaerae	o__Tepidisphaerales	f__WD2101_soil_group	g__norank_f__WD2101_soil_group	s__unclassified_g__norank_f__WD2101_soil_group	OTU1894	8	12	5	1	18	7	0	4	6	0	9	6	1	13	15	2	10	3	3	6	2	3	13	2	4	6	3	162
d__Bacteria	k__norank_d__Bacteria	p__Planctomycetes	c__Phycisphaerae	o__Tepidisphaerales	f__WD2101_soil_group	g__norank_f__WD2101_soil_group	s__uncultured_bacterium_g__norank_f__WD2101_soil_group	OTU3120	3	7	3	0	4	0	0	2	2	4	2	3	0	2	5	0	2	3	1	0	0	1	4	2	1	0	3	54
d__Bacteria	k__norank_d__Bacteria	p__Planctomycetes	c__Phycisphaerae	o__Tepidisphaerales	f__WD2101_soil_group	g__norank_f__WD2101_soil_group	s__uncultured_planctomycete_g__norank_f__WD2101_soil_group	OTU2850	5	3	0	1	0	3	6	0	2	9	2	5	6	1	1	2	1	22	8	8	2	11	2	14	5	3	5	127
d__Bacteria	k__norank_d__Bacteria	p__Planctomycetes	c__Phycisphaerae	o__Tepidisphaerales	f__WD2101_soil_group	g__norank_f__WD2101_soil_group	s__uncultured_bacterium_g__norank_f__WD2101_soil_group	OTU2988	6	10	1	1	10	1	0	3	6	1	6	5	1	10	13	0	3	0	2	7	1	0	7	4	0	10	0	108
d__Bacteria	k__norank_d__Bacteria	p__Planctomycetes	c__Phycisphaerae	o__Tepidisphaerales	f__WD2101_soil_group	g__norank_f__WD2101_soil_group	s__unclassified_g__norank_f__WD2101_soil_group	OTU3914	2	0	5	2	1	1	3	1	1	2	1	1	1	0	2	0	1	5	4	0	0	6	0	1	5	0	3	48
d__Bacteria	k__norank_d__Bacteria	p__Planctomycetes	c__Phycisphaerae	o__Tepidisphaerales	f__WD2101_soil_group	g__norank_f__WD2101_soil_group	s__uncultured_bacterium_g__norank_f__WD2101_soil_group	OTU2969	8	16	8	0	9	6	0	2	7	11	12	7	3	8	7	4	3	0	3	15	0	4	4	9	0	25	9	180
d__Bacteria	k__norank_d__Bacteria	p__Planctomycetes	c__Phycisphaerae	o__Tepidisphaerales	f__WD2101_soil_group	g__norank_f__WD2101_soil_group	s__unclassified_g__norank_f__WD2101_soil_group	OTU604	4	4	3	1	2	1	2	2	3	1	3	3	5	3	11	3	0	5	3	1	2	12	5	2	21	2	3	107
d__Bacteria	k__norank_d__Bacteria	p__Planctomycetes	c__Phycisphaerae	o__Tepidisphaerales	f__WD2101_soil_group	g__norank_f__WD2101_soil_group	s__uncultured_bacterium_g__norank_f__WD2101_soil_group	OTU664	3	4	1	0	6	3	0	1	5	1	1	3	1	3	9	2	7	3	3	3	2	5	1	0	4	4	2	77
d__Bacteria	k__norank_d__Bacteria	p__Planctomycetes	c__Phycisphaerae	o__Tepidisphaerales	f__WD2101_soil_group	g__norank_f__WD2101_soil_group	s__uncultured_bacterium_g__norank_f__WD2101_soil_group	OTU3907	8	12	21	4	6	15	6	16	20	26	19	12	3	17	19	2	2	16	28	9	5	4	12	16	7	14	9	328
d__Bacteria	k__norank_d__Bacteria	p__Planctomycetes	c__Phycisphaerae	o__Tepidisphaerales	f__WD2101_soil_group	g__norank_f__WD2101_soil_group	s__uncultured_bacterium_g__norank_f__WD2101_soil_group	OTU2934	44	55	38	6	33	17	8	17	17	21	55	40	19	74	10	7	5	41	10	67	4	26	44	32	31	37	20	778
d__Bacteria	k__norank_d__Bacteria	p__Planctomycetes	c__Phycisphaerae	o__Tepidisphaerales	f__WD2101_soil_group	g__norank_f__WD2101_soil_group	s__uncultured_bacterium_g__norank_f__WD2101_soil_group	OTU4579	2	9	3	1	7	7	4	3	4	1	6	4	5	5	8	3	1	2	3	8	0	10	3	3	8	3	7	120
d__Bacteria	k__norank_d__Bacteria	p__Planctomycetes	c__Phycisphaerae	o__Tepidisphaerales	f__WD2101_soil_group	g__norank_f__WD2101_soil_group	s__uncultured_bacterium_g__norank_f__WD2101_soil_group	OTU3903	7	5	15	11	2	14	10	2	7	10	9	15	2	4	11	2	6	15	25	8	5	22	9	12	9	9	10	256
d__Bacteria	k__norank_d__Bacteria	p__Planctomycetes	c__Phycisphaerae	o__Tepidisphaerales	f__WD2101_soil_group	g__norank_f__WD2101_soil_group	s__uncultured_bacterium_g__norank_f__WD2101_soil_group	OTU317	2	0	2	1	1	3	1	1	1	1	0	0	0	1	4	1	3	0	1	0	0	1	0	0	1	0	2	27
d__Bacteria	k__norank_d__Bacteria	p__Planctomycetes	c__Phycisphaerae	o__Tepidisphaerales	f__WD2101_soil_group	g__norank_f__WD2101_soil_group	s__uncultured_bacterium_g__norank_f__WD2101_soil_group	OTU3198	10	29	6	0	11	3	2	2	3	1	15	10	1	12	14	1	4	4	1	13	0	3	11	7	6	5	3	177
d__Bacteria	k__norank_d__Bacteria	p__Planctomycetes	c__Phycisphaerae	o__Tepidisphaerales	f__WD2101_soil_group	g__norank_f__WD2101_soil_group	s__uncultured_bacterium_g__norank_f__WD2101_soil_group	OTU3916	30	33	39	1	21	5	5	5	7	9	25	19	9	37	22	4	3	35	10	37	5	17	20	26	31	37	22	514
d__Bacteria	k__norank_d__Bacteria	p__Planctomycetes	c__Phycisphaerae	o__Tepidisphaerales	f__WD2101_soil_group	g__norank_f__WD2101_soil_group	s__uncultured_bacterium_g__norank_f__WD2101_soil_group	OTU3919	6	10	3	1	12	3	1	3	1	0	19	13	0	12	10	1	6	0	2	10	0	2	9	3	4	7	4	142
d__Bacteria	k__norank_d__Bacteria	p__Proteobacteria	c__Alphaproteobacteria	o__Rhizobiales	f__Xanthobacteraceae	g__norank_f__Xanthobacteraceae	s__unclassified_g__norank_f__Xanthobacteraceae	OTU598	6	18	7	3	16	10	3	0	10	7	21	13	3	15	17	2	6	11	7	8	7	9	12	8	14	11	11	255
d__Bacteria	k__norank_d__Bacteria	p__Proteobacteria	c__Alphaproteobacteria	o__Rhizobiales	f__Xanthobacteraceae	g__norank_f__Xanthobacteraceae	s__unclassified_g__norank_f__Xanthobacteraceae	OTU2336	18	17	7	1	20	11	5	2	4	5	20	29	9	24	20	8	10	49	9	8	7	52	17	15	59	7	7	440
d__Bacteria	k__norank_d__Bacteria	p__Proteobacteria	c__Alphaproteobacteria	o__Rhizobiales	f__Xanthobacteraceae	g__norank_f__Xanthobacteraceae	s__unclassified_g__norank_f__Xanthobacteraceae	OTU2200	3	2	3	1	6	1	1	0	2	0	3	0	2	3	3	2	8	3	0	3	0	1	2	0	6	3	0	58
d__Bacteria	k__norank_d__Bacteria	p__Proteobacteria	c__Deltaproteobacteria	o__Myxococcales	f__bacteriap25	g__norank_f__bacteriap25	s__uncultured_soil_bacterium_g__norank_f__bacteriap25	OTU810	3	1	0	0	0	2	0	0	1	0	0	2	0	0	1	22	17	1	0	0	2	5	3	0	3	1	5	69
d__Bacteria	k__norank_d__Bacteria	p__Proteobacteria	c__Deltaproteobacteria	o__Myxococcales	f__bacteriap25	g__norank_f__bacteriap25	s__uncultured_delta_proteobacterium_g__norank_f__bacteriap25	OTU2823	13	29	4	1	6	2	0	1	5	3	9	6	3	6	4	5	27	2	2	5	1	9	5	5	4	1	1	159
d__Bacteria	k__norank_d__Bacteria	p__Proteobacteria	c__Deltaproteobacteria	o__Myxococcales	f__bacteriap25	g__norank_f__bacteriap25	s__uncultured_Desulfuromonadales_bacterium_g__norank_f__bacteriap25	OTU2788	121	163	46	7	112	20	15	2	26	12	117	105	39	105	99	83	142	83	15	80	7	164	78	44	113	26	31	1855
d__Bacteria	k__norank_d__Bacteria	p__Proteobacteria	c__Deltaproteobacteria	o__Myxococcales	f__bacteriap25	g__norank_f__bacteriap25	s__metagenome_g__norank_f__bacteriap25	OTU3418	10	29	14	2	15	21	9	10	15	13	27	11	5	18	16	33	43	13	8	12	3	11	15	17	6	16	8	400
d__Bacteria	k__norank_d__Bacteria	p__Bacteroidetes	c__Bacteroidia	o__Sphingobacteriales	f__env.OPS_17	g__norank_f__env.OPS_17	s__unclassified_g__norank_f__env.OPS_17	OTU1424	34	35	33	22	20	16	5	29	22	32	37	14	20	34	12	13	4	12	12	44	4	25	64	40	24	35	26	668
d__Bacteria	k__norank_d__Bacteria	p__Bacteroidetes	c__Bacteroidia	o__Sphingobacteriales	f__env.OPS_17	g__norank_f__env.OPS_17	s__metagenome_g__norank_f__env.OPS_17	OTU2334	1	1	4	6	1	1	3	8	7	16	4	2	5	6	5	3	1	7	9	8	1	14	6	1	10	9	9	148
d__Bacteria	k__norank_d__Bacteria	p__Bacteroidetes	c__Bacteroidia	o__Sphingobacteriales	f__env.OPS_17	g__norank_f__env.OPS_17	s__unclassified_g__norank_f__env.OPS_17	OTU3862	0	2	0	0	0	0	0	0	2	3	2	0	6	0	1	0	0	0	0	0	0	0	0	6	0	0	5	27
d__Bacteria	k__norank_d__Bacteria	p__Bacteroidetes	c__Bacteroidia	o__Sphingobacteriales	f__env.OPS_17	g__norank_f__env.OPS_17	s__uncultured_bacterium_g__norank_f__env.OPS_17	OTU41	0	0	0	0	0	3	5	0	0	1	0	0	0	0	0	1	0	3	0	2	0	0	0	7	0	0	0	22
d__Bacteria	k__norank_d__Bacteria	p__Bacteroidetes	c__Bacteroidia	o__Sphingobacteriales	f__env.OPS_17	g__norank_f__env.OPS_17	s__unclassified_g__norank_f__env.OPS_17	OTU1294	1	4	5	1	2	2	0	1	1	3	3	3	0	0	1	0	0	0	0	1	0	1	0	13	11	11	1	65
d__Bacteria	k__norank_d__Bacteria	p__Bacteroidetes	c__Bacteroidia	o__Sphingobacteriales	f__env.OPS_17	g__norank_f__env.OPS_17	s__unclassified_g__norank_f__env.OPS_17	OTU4504	1	0	1	0	0	3	4	1	2	2	0	0	2	0	0	0	0	8	5	0	5	10	0	0	2	3	2	51
d__Bacteria	k__norank_d__Bacteria	p__Bacteroidetes	c__Bacteroidia	o__Sphingobacteriales	f__env.OPS_17	g__norank_f__env.OPS_17	s__unclassified_g__norank_f__env.OPS_17	OTU1456	2	6	1	0	6	0	2	9	9	0	2	1	0	1	3	0	4	0	0	0	1	1	2	2	0	0	0	52
d__Bacteria	k__norank_d__Bacteria	p__Bacteroidetes	c__Bacteroidia	o__Sphingobacteriales	f__env.OPS_17	g__norank_f__env.OPS_17	s__uncultured_Bacteroidetes_bacterium_g__norank_f__env.OPS_17	OTU1552	0	0	0	0	0	8	5	0	2	34	0	2	5	0	0	4	1	16	1	1	1	9	2	26	3	0	1	121
d__Bacteria	k__norank_d__Bacteria	p__Bacteroidetes	c__Bacteroidia	o__Sphingobacteriales	f__env.OPS_17	g__norank_f__env.OPS_17	s__uncultured_bacterium_g__norank_f__env.OPS_17	OTU1049	3	0	2	0	1	0	1	0	0	1	2	0	5	2	2	1	0	2	1	1	0	2	0	3	3	0	0	32
d__Bacteria	k__norank_d__Bacteria	p__Bacteroidetes	c__Bacteroidia	o__Sphingobacteriales	f__env.OPS_17	g__norank_f__env.OPS_17	s__uncultured_soil_bacterium_g__norank_f__env.OPS_17	OTU809	0	4	1	1	0	0	0	3	1	0	3	2	0	5	0	0	0	0	0	1	0	1	0	0	5	0	0	27
d__Bacteria	k__norank_d__Bacteria	p__Bacteroidetes	c__Bacteroidia	o__Sphingobacteriales	f__env.OPS_17	g__norank_f__env.OPS_17	s__metagenome_g__norank_f__env.OPS_17	OTU2308	1	3	1	0	0	1	0	19	7	20	1	6	2	30	0	0	0	2	14	10	2	13	20	11	5	13	14	195
d__Bacteria	k__norank_d__Bacteria	p__Bacteroidetes	c__Bacteroidia	o__Sphingobacteriales	f__env.OPS_17	g__norank_f__env.OPS_17	s__uncultured_bacterium_g__norank_f__env.OPS_17	OTU716	0	0	0	0	1	0	0	1	0	0	4	1	0	11	0	0	0	1	4	5	0	8	12	0	0	2	4	54
d__Bacteria	k__norank_d__Bacteria	p__Bacteroidetes	c__Bacteroidia	o__Sphingobacteriales	f__env.OPS_17	g__norank_f__env.OPS_17	s__uncultured_Bacteroidetes_bacterium_g__norank_f__env.OPS_17	OTU1515	7	3	5	2	9	22	5	5	9	9	22	16	4	21	8	4	1	26	18	10	6	32	10	14	14	14	14	310
d__Bacteria	k__norank_d__Bacteria	p__Bacteroidetes	c__Bacteroidia	o__Sphingobacteriales	f__env.OPS_17	g__norank_f__env.OPS_17	s__uncultured_Bacteroidetes_bacterium_g__norank_f__env.OPS_17	OTU1074	1	1	0	0	1	4	0	3	1	2	6	12	0	10	4	0	0	0	4	12	0	5	12	7	14	2	6	107
d__Bacteria	k__norank_d__Bacteria	p__Bacteroidetes	c__Bacteroidia	o__Sphingobacteriales	f__env.OPS_17	g__norank_f__env.OPS_17	s__uncultured_Bacteroidetes_bacterium_g__norank_f__env.OPS_17	OTU3731	0	1	0	0	1	11	7	13	3	39	9	0	3	3	3	16	4	10	20	13	0	11	27	15	1	4	7	221
d__Bacteria	k__norank_d__Bacteria	p__Proteobacteria	c__Gammaproteobacteria	o__Gammaproteobacteria_Incertae_Sedis	f__unclassified_o__Gammaproteobacteria_Incertae_Sedis	g__norank_f__unclassified_o__Gammaproteobacteria_Incertae_Sedis	s__unclassified_g__norank_f__unclassified_o__Gammaproteobacteria_Incertae_Sedis	OTU3243	8	34	1	1	4	3	3	3	2	2	2	3	3	10	1	0	1	1	1	7	1	5	6	6	6	6	2	122
d__Bacteria	k__norank_d__Bacteria	p__Proteobacteria	c__Gammaproteobacteria	o__Gammaproteobacteria_Incertae_Sedis	f__unclassified_o__Gammaproteobacteria_Incertae_Sedis	g__norank_f__unclassified_o__Gammaproteobacteria_Incertae_Sedis	s__uncultured_soil_bacterium_g__norank_f__unclassified	OTU3130	0	1	0	0	1	0	1	2	0	0	6	9	0	2	2	0	0	0	1	0	1	0	4	1	2	2	0	35
d__Bacteria	k__norank_d__Bacteria	p__Proteobacteria	c__Gammaproteobacteria	o__Gammaproteobacteria_Incertae_Sedis	f__unclassified_o__Gammaproteobacteria_Incertae_Sedis	g__norank_f__unclassified_o__Gammaproteobacteria_Incertae_Sedis	s__unclassified_g__norank_f__unclassified_o__Gammaproteobacteria_Incertae_Sedis	OTU3006	16	36	9	1	44	11	1	21	31	3	39	17	5	58	23	9	13	2	0	24	1	30	14	9	30	13	6	466
d__Bacteria	k__norank_d__Bacteria	p__Proteobacteria	c__Gammaproteobacteria	o__Gammaproteobacteria_Incertae_Sedis	f__unclassified_o__Gammaproteobacteria_Incertae_Sedis	g__norank_f__unclassified_o__Gammaproteobacteria_Incertae_Sedis	s__unclassified_g__norank_f__unclassified_o__Gammaproteobacteria_Incertae_Sedis	OTU403	0	2	0	0	5	2	0	1	4	0	3	1	0	2	2	0	0	0	0	1	0	2	3	0	0	4	0	32
d__Bacteria	k__norank_d__Bacteria	p__Proteobacteria	c__Gammaproteobacteria	o__Gammaproteobacteria_Incertae_Sedis	f__unclassified_o__Gammaproteobacteria_Incertae_Sedis	g__norank_f__unclassified_o__Gammaproteobacteria_Incertae_Sedis	s__unclassified_g__norank_f__unclassified_o__Gammaproteobacteria_Incertae_Sedis	OTU3114	3	9	2	0	8	1	0	2	5	0	7	12	1	5	18	1	2	0	0	3	0	4	5	1	5	6	4	104
d__Bacteria	k__norank_d__Bacteria	p__Acidobacteria	c__Blastocatellia_Subgroup_4	o__11-24	f__norank_o__11-24	g__norank_o__11-24	s__uncultured_Acidobacteriales_bacterium_g__norank_o__11-24	OTU472	6	3	1	0	9	1	0	0	2	0	8	10	1	3	4	11	20	1	0	4	0	8	1	3	10	2	2	110
d__Bacteria	k__norank_d__Bacteria	p__Acidobacteria	c__Blastocatellia_Subgroup_4	o__11-24	f__norank_o__11-24	g__norank_o__11-24	s__unclassified_g__norank_o__11-24	OTU3208	1	3	1	0	4	1	1	0	1	1	1	4	0	6	3	13	16	1	0	6	0	1	3	2	6	3	0	78
d__Bacteria	k__norank_d__Bacteria	p__Acidobacteria	c__Blastocatellia_Subgroup_4	o__11-24	f__norank_o__11-24	g__norank_o__11-24	s__uncultured_Acidobacteriales_bacterium_g__norank_o__11-24	OTU3635	7	3	3	1	6	1	0	0	0	0	0	4	0	5	5	27	18	1	2	4	0	15	1	6	12	1	2	124
d__Bacteria	k__norank_d__Bacteria	p__Acidobacteria	c__Blastocatellia_Subgroup_4	o__11-24	f__norank_o__11-24	g__norank_o__11-24	s__uncultured_Acidobacteria_bacterium_g__norank_o__11-24	OTU548	3	0	0	0	3	0	0	0	0	0	3	2	1	1	1	4	6	0	0	0	0	6	1	1	1	0	4	37
d__Bacteria	k__norank_d__Bacteria	p__Acidobacteria	c__Acidobacteriia	o__Acidobacteriales	f__norank_o__Acidobacteriales	g__norank_o__Acidobacteriales	s__uncultured_bacterium_g__norank_o__Acidobacteriales	OTU3644	8	4	4	0	0	7	3	3	2	5	0	2	4	0	3	11	5	8	10	3	3	73	2	3	35	0	10	208
d__Bacteria	k__norank_d__Bacteria	p__Acidobacteria	c__Acidobacteriia	o__Acidobacteriales	f__norank_o__Acidobacteriales	g__norank_o__Acidobacteriales	s__uncultured_Acidobacteriaceae_bacterium_g__norank_o__Acidobacteriales	OTU3865	2	1	47	15	0	24	150	9	15	52	0	14	33	7	14	3	3	180	208	11	67	114	8	14	88	5	30	1114
d__Bacteria	k__norank_d__Bacteria	p__Acidobacteria	c__Acidobacteriia	o__Acidobacteriales	f__norank_o__Acidobacteriales	g__norank_o__Acidobacteriales	s__uncultured_Acidobacteriaceae_bacterium_g__norank_o__Acidobacteriales	OTU4006	0	0	3	4	0	0	6	0	0	1	0	0	2	0	0	0	0	0	6	0	4	2	1	1	5	0	2	37
d__Bacteria	k__norank_d__Bacteria	p__Acidobacteria	c__Acidobacteriia	o__Acidobacteriales	f__norank_o__Acidobacteriales	g__norank_o__Acidobacteriales	s__unclassified_g__norank_o__Acidobacteriales	OTU4518	2	0	1	0	1	8	2	1	2	3	1	0	4	0	1	0	0	4	5	1	6	3	0	0	7	0	2	54
d__Bacteria	k__norank_d__Bacteria	p__Acidobacteria	c__Acidobacteriia	o__Acidobacteriales	f__norank_o__Acidobacteriales	g__norank_o__Acidobacteriales	s__Acidobacteria_bacterium_LWQ13	OTU3477	9	7	15	2	5	10	18	7	2	9	4	20	9	15	5	5	3	26	9	43	7	13	8	15	10	12	3	291
d__Bacteria	k__norank_d__Bacteria	p__Acidobacteria	c__Acidobacteriia	o__Acidobacteriales	f__norank_o__Acidobacteriales	g__norank_o__Acidobacteriales	s__uncultured_bacterium_g__norank_o__Acidobacteriales	OTU3935	4	0	0	0	1	2	0	2	0	0	1	0	0	1	1	5	9	0	0	0	0	11	0	0	1	0	4	42
d__Bacteria	k__norank_d__Bacteria	p__Acidobacteria	c__Acidobacteriia	o__Acidobacteriales	f__norank_o__Acidobacteriales	g__norank_o__Acidobacteriales	s__unclassified_g__norank_o__Acidobacteriales	OTU2745	4	2	6	1	0	2	10	0	1	4	0	1	4	0	4	2	4	12	11	1	5	34	0	1	19	0	1	129
d__Bacteria	k__norank_d__Bacteria	p__Actinobacteria	c__Actinobacteria	o__Actinomarinales	f__norank_o__Actinomarinales	g__norank_o__Actinomarinales	s__uncultured_soil_bacterium_g__norank_o__Actinomarinales	OTU1044	3	7	1	0	11	2	0	0	0	0	5	11	0	12	5	5	10	1	0	3	0	6	1	6	3	1	2	95
d__Bacteria	k__norank_d__Bacteria	p__Actinobacteria	c__Actinobacteria	o__Actinomarinales	f__norank_o__Actinomarinales	g__norank_o__Actinomarinales	s__uncultured_compost_bacterium_g__norank_o__Actinomarinales	OTU975	0	11	1	1	4	0	0	0	1	0	4	5	0	5	0	2	1	3	1	1	1	1	4	3	0	2	1	52
d__Bacteria	k__norank_d__Bacteria	p__Actinobacteria	c__Actinobacteria	o__Actinomarinales	f__norank_o__Actinomarinales	g__norank_o__Actinomarinales	s__uncultured_Actinobacteridae_bacterium_g__norank	OTU4209	3	0	0	0	15	0	0	0	1	0	6	10	1	6	3	22	15	1	0	2	0	1	1	0	8	1	0	96
d__Bacteria	k__norank_d__Bacteria	p__Actinobacteria	c__Actinobacteria	o__Actinomarinales	f__norank_o__Actinomarinales	g__norank_o__Actinomarinales	s__unclassified_g__norank_o__Actinomarinales	OTU1634	2	7	0	1	12	0	0	0	0	0	4	5	0	6	1	0	1	4	0	1	0	4	0	4	1	1	0	54
d__Bacteria	k__norank_d__Bacteria	p__Chloroflexi	c__Anaerolineae	o__Ardenticatenales	f__norank_o__Ardenticatenales	g__norank_o__Ardenticatenales	s__unclassified_g__norank_o__Ardenticatenales	OTU992	1	1	0	0	7	1	0	0	0	0	5	3	0	3	1	6	3	0	0	0	0	0	2	1	0	0	0	34
d__Bacteria	k__norank_d__Bacteria	p__Chloroflexi	c__Anaerolineae	o__Ardenticatenales	f__norank_o__Ardenticatenales	g__norank_o__Ardenticatenales	s__unclassified_g__norank_o__Ardenticatenales	OTU3199	0	10	1	1	3	0	0	1	5	0	7	6	0	2	2	0	8	0	0	6	0	0	6	3	0	6	0	67
d__Bacteria	k__norank_d__Bacteria	p__Chloroflexi	c__Anaerolineae	o__Ardenticatenales	f__norank_o__Ardenticatenales	g__norank_o__Ardenticatenales	s__uncultured_prokaryote_g__norank_o__Ardenticatenales	OTU2297	4	5	0	0	7	1	0	0	0	0	7	5	1	1	7	1	17	0	2	3	0	1	4	1	1	2	1	71
d__Bacteria	k__norank_d__Bacteria	p__Chloroflexi	c__Anaerolineae	o__Ardenticatenales	f__norank_o__Ardenticatenales	g__norank_o__Ardenticatenales	s__uncultured_Litorilinea_sp.	OTU3478	5	6	0	0	1	3	0	0	0	0	7	7	0	2	1	3	5	2	0	3	0	2	0	2	4	0	0	53
d__Bacteria	k__norank_d__Bacteria	p__Chloroflexi	c__Anaerolineae	o__Ardenticatenales	f__norank_o__Ardenticatenales	g__norank_o__Ardenticatenales	s__unclassified_g__norank_o__Ardenticatenales	OTU1796	3	0	0	0	0	0	0	0	1	0	1	0	0	0	0	34	62	1	0	0	0	1	0	0	0	0	1	104
d__Bacteria	k__norank_d__Bacteria	p__Chloroflexi	c__Anaerolineae	o__Ardenticatenales	f__norank_o__Ardenticatenales	g__norank_o__Ardenticatenales	s__uncultured_archaeon_g__norank_o__Ardenticatenales	OTU1028	7	2	0	1	3	1	0	0	1	1	7	3	0	2	10	20	31	0	0	2	1	3	2	2	1	0	0	100
d__Bacteria	k__norank_d__Bacteria	p__Chloroflexi	c__Anaerolineae	o__Ardenticatenales	f__norank_o__Ardenticatenales	g__norank_o__Ardenticatenales	s__uncultured_bacterium_g__norank_o__Ardenticatenales	OTU1683	2	3	0	0	5	0	0	0	0	0	6	0	0	2	0	3	16	0	0	2	0	1	3	1	1	0	0	45
d__Bacteria	k__norank_d__Bacteria	p__Chloroflexi	c__Anaerolineae	o__Ardenticatenales	f__norank_o__Ardenticatenales	g__norank_o__Ardenticatenales	s__uncultured_Ardenticatenia_bacterium	OTU3419	2	2	1	0	11	0	0	0	0	0	9	3	0	2	1	2	2	1	0	6	0	0	3	2	1	0	1	49
d__Bacteria	k__norank_d__Bacteria	p__Chloroflexi	c__Anaerolineae	o__Ardenticatenales	f__norank_o__Ardenticatenales	g__norank_o__Ardenticatenales	s__unclassified_g__norank_o__Ardenticatenales	OTU4311	10	2	0	1	2	0	0	0	0	0	1	0	1	0	0	62	106	0	0	0	0	3	7	1	0	0	1	197
d__Bacteria	k__norank_d__Bacteria	p__Armatimonadetes	c__Armatimonadia	o__Armatimonadales	f__norank_o__Armatimonadales	g__norank_o__Armatimonadales	s__unclassified_g__norank_o__Armatimonadales	OTU80	10	8	2	2	1	2	3	1	1	0	4	4	3	1	1	1	2	6	0	3	3	1	3	5	3	1	1	72
d__Bacteria	k__norank_d__Bacteria	p__Proteobacteria	c__Alphaproteobacteria	o__Azospirillales	f__norank_o__Azospirillales	g__norank_o__Azospirillales	s__uncultured_bacterium_g__norank_o__Azospirillales	OTU2948	63	93	41	6	89	29	15	6	26	16	104	66	23	144	75	28	44	50	12	62	6	62	63	57	67	34	22	1303
d__Bacteria	k__norank_d__Bacteria	p__Bacteroidetes	c__Bacteroidia	o__Bacteroidetes_VC2.1_Bac22	f__norank_o__Bacteroidetes_VC2.1_Bac22	g__norank_o__Bacteroidetes_VC2.1_Bac22	s__metagenome_g__norank_o__Bacteroidetes_VC2.1_Bac22	OTU119	8	9	3	1	3	3	1	32	4	5	6	0	0	1	1	2	7	1	0	4	0	0	2	1	0	0	5	99
d__Bacteria	k__norank_d__Bacteria	p__Bacteroidetes	c__Bacteroidia	o__Bacteroidetes_VC2.1_Bac22	f__norank_o__Bacteroidetes_VC2.1_Bac22	g__norank_o__Bacteroidetes_VC2.1_Bac22	s__metagenome_g__norank_o__Bacteroidetes_VC2.1_Bac22	OTU3580	4	7	18	1	1	3	8	10	3	4	4	1	4	6	23	7	2	2	1	5	2	18	2	2	11	2	8	159
d__Bacteria	k__norank_d__Bacteria	p__Proteobacteria	c__Deltaproteobacteria	o__Bradymonadales	f__norank_o__Bradymonadales	g__norank_o__Bradymonadales	s__unclassified_g__norank_o__Bradymonadales	OTU4028	8	0	0	0	0	0	0	0	0	0	1	0	0	1	0	65	23	0	0	1	0	2	0	0	0	0	6	107
d__Bacteria	k__norank_d__Bacteria	p__Chloroflexi	c__Ktedonobacteria	o__C0119	f__norank_o__C0119	g__norank_o__C0119	s__uncultured_soil_bacterium_g__norank_o__C0119	OTU2914	21	37	17	2	27	5	5	8	12	8	75	38	3	48	26	10	10	23	3	61	0	20	31	22	34	17	8	571
d__Bacteria	k__norank_d__Bacteria	p__Chloroflexi	c__Ktedonobacteria	o__C0119	f__norank_o__C0119	g__norank_o__C0119	s__uncultured_bacterium_g__norank_o__C0119	OTU3944	21	13	12	8	9	9	16	4	6	27	21	21	24	34	20	24	9	37	18	26	8	45	36	30	96	18	10	602
d__Bacteria	k__norank_d__Bacteria	p__Chloroflexi	c__Ktedonobacteria	o__C0119	f__norank_o__C0119	g__norank_o__C0119	s__uncultured_bacterium_g__norank_o__C0119	OTU3116	2	5	3	0	2	5	0	0	1	1	9	8	2	5	2	1	0	2	2	1	0	3	3	2	6	2	0	67
d__Bacteria	k__norank_d__Bacteria	p__Chloroflexi	c__Ktedonobacteria	o__C0119	f__norank_o__C0119	g__norank_o__C0119	s__uncultured_bacterium_g__norank_o__C0119	OTU3040	1	1	1	0	2	0	0	0	0	0	0	6	0	3	2	2	2	26	1	2	1	6	2	2	19	0	0	79
d__Bacteria	k__norank_d__Bacteria	p__Chloroflexi	c__Ktedonobacteria	o__C0119	f__norank_o__C0119	g__norank_o__C0119	s__uncultured_soil_bacterium_g__norank_o__C0119	OTU3329	3	3	1	0	7	1	0	0	0	0	11	10	0	7	2	0	0	0	0	5	0	1	3	6	6	0	0	66
d__Bacteria	k__norank_d__Bacteria	p__Proteobacteria	c__Gammaproteobacteria	o__CCD24	f__norank_o__CCD24	g__norank_o__CCD24	s__unclassified_g__norank_o__CCD24	OTU3117	15	31	11	2	13	4	3	2	2	2	17	12	4	27	3	5	21	7	4	13	1	11	8	13	21	14	2	268
d__Bacteria	k__norank_d__Bacteria	p__Proteobacteria	c__Gammaproteobacteria	o__CCD24	f__norank_o__CCD24	g__norank_o__CCD24	s__uncultured_bacterium_g__norank_o__CCD24	OTU3011	82	200	62	11	93	23	13	25	56	20	140	51	11	121	50	18	61	30	11	126	5	41	62	60	60	85	27	1544
d__Bacteria	k__norank_d__Bacteria	p__Proteobacteria	c__Gammaproteobacteria	o__CCD24	f__norank_o__CCD24	g__norank_o__CCD24	s__unclassified_g__norank_o__CCD24	OTU4523	15	11	49	7	2	3	19	3	2	6	16	5	7	14	6	27	7	26	0	18	1	24	5	7	34	6	4	324
d__Bacteria	k__norank_d__Bacteria	p__Planctomycetes	c__Phycisphaerae	o__CCM11a	f__norank_o__CCM11a	g__norank_o__CCM11a	s__uncultured_bacterium_g__norank_o__CCM11a	OTU3791	2	6	1	0	4	1	0	0	1	1	0	3	0	5	3	2	2	0	0	4	0	5	1	0	2	3	2	48
d__Bacteria	k__norank_d__Bacteria	p__Proteobacteria	c__Gammaproteobacteria	o__CCM19a	f__norank_o__CCM19a	g__norank_o__CCM19a	s__uncultured_gamma_proteobacterium_g__norank_o__CCM19a	OTU1308	14	36	10	3	15	5	6	6	15	5	29	16	5	16	14	0	9	4	5	23	3	24	12	18	13	17	5	328
d__Bacteria	k__norank_d__Bacteria	p__Patescibacteria	c__Microgenomatia	o__Candidatus_Curtissbacteria	f__norank_o__Candidatus_Curtissbacteria	g__norank_o__Candidatus_Curtissbacteria	s__unclassified_g__norank_o__Candidatus_Curtissbacteria	OTU2136	10	21	4	0	7	0	0	1	2	1	14	5	0	11	6	0	3	1	1	12	0	3	4	5	19	2	1	133
d__Bacteria	k__norank_d__Bacteria	p__Patescibacteria	c__Microgenomatia	o__Candidatus_Woesebacteria	f__norank_o__Candidatus_Woesebacteria	g__norank_o__Candidatus_Woesebacteria	s__uncultured_Microgenomates_group_bacterium_g__norank_o__Candidatus_Woesebacteria	OTU2712	1	4	0	1	1	0	0	0	0	1	1	0	1	3	2	1	0	2	0	6	0	4	1	0	11	1	1	42
d__Bacteria	k__norank_d__Bacteria	p__Patescibacteria	c__Microgenomatia	o__Candidatus_Woykebacteria	f__norank_o__Candidatus_Woykebacteria	g__norank_o__Candidatus_Woykebacteria	s__uncultured_bacterium_g__norank_o__Candidatus_Woykebacteria	OTU2999	25	81	13	8	7	4	0	15	24	6	51	12	3	45	10	2	5	9	4	67	7	24	29	15	21	18	10	515
d__Bacteria	k__norank_d__Bacteria	p__Bacteroidetes	c__Bacteroidia	o__Chitinophagales	f__norank_o__Chitinophagales	g__norank_o__Chitinophagales	s__unclassified_g__norank_o__Chitinophagales	OTU557	1	4	2	1	3	1	2	0	1	1	2	0	1	2	5	1	2	5	0	2	0	0	3	2	4	0	3	48
d__Bacteria	k__norank_d__Bacteria	p__Bacteroidetes	c__Bacteroidia	o__Chitinophagales	f__norank_o__Chitinophagales	g__norank_o__Chitinophagales	s__unclassified_g__norank_o__Chitinophagales	OTU4095	1	0	0	0	2	9	1	2	11	4	3	5	2	1	2	4	1	5	5	3	0	5	2	7	4	4	1	84
d__Bacteria	k__norank_d__Bacteria	p__Bacteroidetes	c__Bacteroidia	o__Chitinophagales	f__norank_o__Chitinophagales	g__norank_o__Chitinophagales	s__unclassified_g__norank_o__Chitinophagales	OTU207	4	2	2	0	2	0	0	3	5	4	3	1	0	6	1	2	0	0	2	4	1	2	1	1	4	2	3	55
d__Bacteria	k__norank_d__Bacteria	p__Bacteroidetes	c__Bacteroidia	o__Chitinophagales	f__norank_o__Chitinophagales	g__norank_o__Chitinophagales	s__unclassified_g__norank_o__Chitinophagales	OTU93	2	3	0	0	1	5	0	1	1	3	4	1	6	1	0	1	0	1	2	1	0	1	1	1	0	4	2	42
d__Bacteria	k__norank_d__Bacteria	p__Bacteroidetes	c__Bacteroidia	o__Chitinophagales	f__norank_o__Chitinophagales	g__norank_o__Chitinophagales	s__uncultured_soil_bacterium_g__norank_o__Chitinophagales	OTU2274	1	1	0	1	2	4	0	2	3	0	5	0	1	1	3	1	0	2	6	1	0	1	4	4	3	0	0	46
d__Bacteria	k__norank_d__Bacteria	p__Bacteroidetes	c__Bacteroidia	o__Chitinophagales	f__norank_o__Chitinophagales	g__norank_o__Chitinophagales	s__unclassified_g__norank_o__Chitinophagales	OTU2356	2	6	2	0	0	1	0	2	4	0	2	4	0	2	0	1	1	0	0	3	0	0	1	1	1	3	2	38
d__Bacteria	k__norank_d__Bacteria	p__Cyanobacteria	c__Oxyphotobacteria	o__Chloroplast	f__norank_o__Chloroplast	g__norank_o__Chloroplast	s__unclassified_g__norank_o__Chloroplast	OTU3194	2	2	3	0	5	4	4	0	38	20	12	100	6	9	38	23	4	51	4	12	2	25	89	60	4	18	5	540
d__Bacteria	k__norank_d__Bacteria	p__Cyanobacteria	c__Oxyphotobacteria	o__Chloroplast	f__norank_o__Chloroplast	g__norank_o__Chloroplast	s__unclassified_g__norank_o__Chloroplast	OTU3229	4	8	3	1	8	6	1	2	12	21	13	32	10	6	5	2	4	17	6	8	1	12	19	49	13	4	3	270
d__Bacteria	k__norank_d__Bacteria	p__Cyanobacteria	c__Oxyphotobacteria	o__Chloroplast	f__norank_o__Chloroplast	g__norank_o__Chloroplast	s__uncultured_Cyanobacterium_sp._g__norank	OTU3077	0	2	0	0	1	4	0	0	41	35	4	23	8	6	137	2	0	3	1	2	0	3	44	26	16	6	3	367
d__Bacteria	k__norank_d__Bacteria	p__Cyanobacteria	c__Oxyphotobacteria	o__Chloroplast	f__norank_o__Chloroplast	g__norank_o__Chloroplast	s__unclassified_g__norank_o__Chloroplast	OTU3032	0	0	0	0	0	0	2	0	4	1	0	0	0	0	0	0	1	1	0	0	0	1	5	6	1	0	0	22
d__Bacteria	k__norank_d__Bacteria	p__Cyanobacteria	c__Oxyphotobacteria	o__Chloroplast	f__norank_o__Chloroplast	g__norank_o__Chloroplast	s__unclassified_g__norank_o__Chloroplast	OTU211	1	1	0	0	0	0	0	1	1	15	0	2	0	0	2	1	0	0	1	0	0	5	1	2	4	0	7	44
d__Bacteria	k__norank_d__Bacteria	p__Cyanobacteria	c__Oxyphotobacteria	o__Chloroplast	f__norank_o__Chloroplast	g__norank_o__Chloroplast	s__unclassified_g__norank_o__Chloroplast	OTU2991	6	9	0	2	21	7	3	2	45	15	18	16	1	12	9	14	1	5	5	13	1	49	14	16	47	6	2	339
d__Bacteria	k__norank_d__Bacteria	p__Cyanobacteria	c__Oxyphotobacteria	o__Chloroplast	f__norank_o__Chloroplast	g__norank_o__Chloroplast	s__unclassified_g__norank_o__Chloroplast	OTU2778	7	5	2	1	10	5	1	0	12	7	9	13	0	10	24	12	3	18	5	5	4	36	6	5	100	4	0	304
d__Bacteria	k__norank_d__Bacteria	p__Cyanobacteria	c__Oxyphotobacteria	o__Chloroplast	f__norank_o__Chloroplast	g__norank_o__Chloroplast	s__unclassified_g__norank_o__Chloroplast	OTU2231	670	78	338	3	17	13	8	1	20	7	25	24	14	13	103	17	4	8	7	8	9	10	15	18	25	10	8	1473
d__Bacteria	k__norank_d__Bacteria	p__Cyanobacteria	c__Oxyphotobacteria	o__Chloroplast	f__norank_o__Chloroplast	g__norank_o__Chloroplast	s__unclassified_g__norank_o__Chloroplast	OTU3285	0	0	0	0	0	0	0	0	1	4	0	1	1	0	1	0	0	1	0	0	0	2	0	8	4	0	0	23
d__Bacteria	k__norank_d__Bacteria	p__Cyanobacteria	c__Oxyphotobacteria	o__Chloroplast	f__norank_o__Chloroplast	g__norank_o__Chloroplast	s__unclassified_g__norank_o__Chloroplast	OTU3386	0	0	3	0	1	0	0	2	8	0	4	7	0	8	1	1	0	4	0	0	0	6	1	1	3	2	0	52
d__Bacteria	k__norank_d__Bacteria	p__Armatimonadetes	c__Chthonomonadetes	o__Chthonomonadales	f__norank_o__Chthonomonadales	g__norank_o__Chthonomonadales	s__uncultured_bacterium_g__norank_o__Chthonomonadales	OTU488	3	3	0	1	6	4	2	2	0	1	3	0	0	2	5	2	3	2	1	3	0	2	1	8	4	2	2	62
d__Bacteria	k__norank_d__Bacteria	p__Acidobacteria	c__Blastocatellia_Subgroup_4	o__DS-100	f__norank_o__DS-100	g__norank_o__DS-100	s__uncultured_Acidobacteria_bacterium_g__norank_o__DS-100	OTU1546	0	0	2	0	0	3	4	0	1	3	0	0	3	0	0	0	1	10	2	1	3	9	0	3	3	0	1	49
d__Bacteria	k__norank_d__Bacteria	p__Acidobacteria	c__Blastocatellia_Subgroup_4	o__DS-100	f__norank_o__DS-100	g__norank_o__DS-100	s__uncultured_bacterium_g__norank_o__DS-100	OTU1949	5	4	1	0	14	3	0	0	0	2	33	15	0	17	2	1	5	8	1	11	0	24	6	8	32	0	1	193
d__Bacteria	k__norank_d__Bacteria	p__Acidobacteria	c__Blastocatellia_Subgroup_4	o__DS-100	f__norank_o__DS-100	g__norank_o__DS-100	s__uncultured_bacterium_g__norank_o__DS-100	OTU1312	2	1	0	0	6	0	0	0	0	0	5	2	0	6	0	0	0	0	0	8	0	3	4	4	9	0	0	50
d__Bacteria	k__norank_d__Bacteria	p__Dadabacteria	c__Dadabacteriia	o__Dadabacteriales	f__norank_o__Dadabacteriales	g__norank_o__Dadabacteriales	s__unclassified_g__norank_o__Dadabacteriales	OTU1550	14	21	5	3	13	15	4	0	4	10	22	20	21	28	28	21	27	25	7	22	1	22	28	11	13	13	14	412
d__Bacteria	k__norank_d__Bacteria	p__Dadabacteria	c__Dadabacteriia	o__Dadabacteriales	f__norank_o__Dadabacteriales	g__norank_o__Dadabacteriales	s__uncultured_candidate_division_SBR1093_bacterium	OTU4457	4	2	0	0	0	2	0	0	3	1	0	2	1	8	4	25	25	1	0	3	0	11	4	0	7	0	4	107
d__Bacteria	k__norank_d__Bacteria	p__Proteobacteria	c__Gammaproteobacteria	o__EPR3968-O8a-Bc78	f__norank_o__EPR3968-O8a-Bc78	g__norank_o__EPR3968-O8a-Bc78	s__uncultured_bacterium_g__norank_o__EPR3968-O8a-Bc78	OTU3462	13	7	15	2	13	5	6	8	3	5	11	8	2	14	0	1	0	11	4	43	2	5	7	14	7	9	7	222
d__Bacteria	k__norank_d__Bacteria	p__Proteobacteria	c__Gammaproteobacteria	o__EPR3968-O8a-Bc78	f__norank_o__EPR3968-O8a-Bc78	g__norank_o__EPR3968-O8a-Bc78	s__uncultured_bacterium_g__norank_o__EPR3968-O8a-Bc78	OTU1384	5	9	6	0	12	1	2	4	2	3	5	3	4	15	4	0	0	2	1	7	0	4	4	5	7	5	2	112
d__Bacteria	k__norank_d__Bacteria	p__Proteobacteria	c__Gammaproteobacteria	o__EPR3968-O8a-Bc78	f__norank_o__EPR3968-O8a-Bc78	g__norank_o__EPR3968-O8a-Bc78	s__unclassified_g__norank_o__EPR3968-O8a-Bc78	OTU3151	2	5	0	1	5	0	0	6	0	0	3	0	1	2	7	1	2	0	0	4	0	0	4	1	1	1	0	46
d__Bacteria	k__norank_d__Bacteria	p__Proteobacteria	c__Alphaproteobacteria	o__Elsterales	f__norank_o__Elsterales	g__norank_o__Elsterales	s__uncultured_alpha_proteobacterium_g__norank_o__Elsterales	OTU1277	8	8	1	0	5	0	0	0	1	2	11	9	0	1	1	3	0	1	0	5	0	0	3	4	0	0	2	65
d__Bacteria	k__norank_d__Bacteria	p__Proteobacteria	c__Alphaproteobacteria	o__Elsterales	f__norank_o__Elsterales	g__norank_o__Elsterales	s__unclassified_g__norank_o__Elsterales	OTU176	6	5	6	1	3	3	4	2	2	2	2	2	3	5	1	2	1	11	2	6	4	4	2	8	11	0	3	101
d__Bacteria	k__norank_d__Bacteria	p__Proteobacteria	c__Alphaproteobacteria	o__Elsterales	f__norank_o__Elsterales	g__norank_o__Elsterales	s__uncultured_Acetobacteraceae_bacterium_g__norank_o__Elsterales	OTU1358	3	3	3	0	4	2	3	3	1	2	9	5	3	10	5	0	1	6	3	11	2	3	3	6	3	6	0	100
d__Bacteria	k__norank_d__Bacteria	p__Proteobacteria	c__Alphaproteobacteria	o__Elsterales	f__norank_o__Elsterales	g__norank_o__Elsterales	s__unclassified_g__norank_o__Elsterales	OTU1792	3	13	5	2	5	2	3	1	5	4	4	5	4	6	3	2	3	19	2	2	1	10	1	7	12	3	0	127
d__Bacteria	k__norank_d__Bacteria	p__Proteobacteria	c__Alphaproteobacteria	o__Elsterales	f__norank_o__Elsterales	g__norank_o__Elsterales	s__unclassified_g__norank_o__Elsterales	OTU880	21	14	13	3	5	14	3	1	2	4	14	6	12	31	4	12	2	29	12	16	2	37	8	5	45	12	7	334
d__Bacteria	k__norank_d__Bacteria	p__Proteobacteria	c__Alphaproteobacteria	o__Elsterales	f__norank_o__Elsterales	g__norank_o__Elsterales	s__unclassified_g__norank_o__Elsterales	OTU4416	8	5	9	3	8	11	21	7	3	2	6	19	16	17	10	0	2	33	9	59	18	8	4	11	14	10	6	319
d__Bacteria	k__norank_d__Bacteria	p__Proteobacteria	c__Alphaproteobacteria	o__Elsterales	f__norank_o__Elsterales	g__norank_o__Elsterales	s__unclassified_g__norank_o__Elsterales	OTU881	2	0	4	0	0	4	11	0	0	1	1	2	1	1	1	0	1	42	1	1	4	1	2	2	3	2	4	91
d__Bacteria	k__norank_d__Bacteria	p__Proteobacteria	c__Alphaproteobacteria	o__Elsterales	f__norank_o__Elsterales	g__norank_o__Elsterales	s__uncultured_alpha_proteobacterium_g__norank_o__Elsterales	OTU220	27	18	8	4	3	8	7	2	3	4	13	12	13	32	4	4	4	45	3	14	2	24	9	7	48	7	14	339
d__Bacteria	k__norank_d__Bacteria	p__Proteobacteria	c__Alphaproteobacteria	o__Elsterales	f__norank_o__Elsterales	g__norank_o__Elsterales	s__unclassified_g__norank_o__Elsterales	OTU4034	15	18	7	3	14	13	8	0	6	5	20	32	8	32	9	5	2	67	2	36	3	19	12	10	29	10	6	391
d__Bacteria	k__norank_d__Bacteria	p__Armatimonadetes	c__Fimbriimonadia	o__Fimbriimonadales	f__norank_o__Fimbriimonadales	g__norank_o__Fimbriimonadales	s__uncultured_bacterium_g__norank_o__Fimbriimonadales	OTU3710	9	36	15	0	13	2	2	3	3	5	7	14	2	9	9	2	3	7	0	9	1	7	7	15	39	22	7	248
d__Bacteria	k__norank_d__Bacteria	p__Armatimonadetes	c__Fimbriimonadia	o__Fimbriimonadales	f__norank_o__Fimbriimonadales	g__norank_o__Fimbriimonadales	s__uncultured_bacterium_g__norank_o__Fimbriimonadales	OTU3633	2	2	3	1	1	0	1	1	1	0	1	3	0	1	1	1	0	1	0	8	0	3	4	3	6	1	1	46
d__Bacteria	k__norank_d__Bacteria	p__Actinobacteria	c__Actinobacteria	o__Gaiellales	f__norank_o__Gaiellales	g__norank_o__Gaiellales	s__uncultured_microorganism_g__norank_o__Gaiellales	OTU3037	19	39	21	7	39	29	7	11	13	9	44	28	17	37	28	23	16	20	18	35	11	29	47	25	18	24	21	635
d__Bacteria	k__norank_d__Bacteria	p__Actinobacteria	c__Actinobacteria	o__Gaiellales	f__norank_o__Gaiellales	g__norank_o__Gaiellales	s__unclassified_g__norank_o__Gaiellales	OTU3366	3	3	5	5	2	7	15	2	4	7	6	13	18	1	0	4	2	29	6	11	5	6	5	3	7	6	5	180
d__Bacteria	k__norank_d__Bacteria	p__Actinobacteria	c__Actinobacteria	o__Gaiellales	f__norank_o__Gaiellales	g__norank_o__Gaiellales	s__uncultured_organism_g__norank_o__Gaiellales	OTU3427	3	5	1	1	2	3	1	2	2	1	3	6	0	1	2	3	4	7	0	0	1	1	7	6	4	0	2	68
d__Bacteria	k__norank_d__Bacteria	p__Actinobacteria	c__Actinobacteria	o__Gaiellales	f__norank_o__Gaiellales	g__norank_o__Gaiellales	s__uncultured_Rubrobacterales_bacterium_g__norank	OTU2809	3	3	1	0	5	0	0	1	1	3	6	2	2	6	6	3	4	3	2	3	1	9	6	8	2	2	5	87
d__Bacteria	k__norank_d__Bacteria	p__Actinobacteria	c__Actinobacteria	o__Gaiellales	f__norank_o__Gaiellales	g__norank_o__Gaiellales	s__uncultured_Rubrobacteria_bacterium_g__norank	OTU608	10	5	3	1	3	0	1	1	0	0	7	3	1	4	1	4	4	8	1	7	2	3	3	2	9	2	3	88
d__Bacteria	k__norank_d__Bacteria	p__Actinobacteria	c__Actinobacteria	o__Gaiellales	f__norank_o__Gaiellales	g__norank_o__Gaiellales	s__uncultured_actinobacterium_g__norank_o__Gaiellales	OTU2973	14	12	2	0	30	2	1	1	5	1	40	33	4	31	8	7	16	9	2	15	0	8	24	9	15	0	6	295
d__Bacteria	k__norank_d__Bacteria	p__Actinobacteria	c__Actinobacteria	o__Gaiellales	f__norank_o__Gaiellales	g__norank_o__Gaiellales	s__unclassified_g__norank_o__Gaiellales	OTU2771	6	1	17	6	0	1	20	0	1	7	3	2	29	3	2	6	4	44	11	8	15	42	6	6	48	6	5	299
d__Bacteria	k__norank_d__Bacteria	p__Actinobacteria	c__Actinobacteria	o__Gaiellales	f__norank_o__Gaiellales	g__norank_o__Gaiellales	s__bacterium_Ellin7530	OTU2862	6	1	2	9	2	1	17	1	2	7	1	6	12	2	0	5	1	36	9	8	8	9	1	6	17	0	5	174
d__Bacteria	k__norank_d__Bacteria	p__Actinobacteria	c__Actinobacteria	o__Gaiellales	f__norank_o__Gaiellales	g__norank_o__Gaiellales	s__unclassified_g__norank_o__Gaiellales	OTU3900	28	3	16	10	4	14	23	1	8	10	12	19	29	17	2	19	9	147	20	27	21	84	24	15	68	4	8	642
d__Bacteria	k__norank_d__Bacteria	p__Proteobacteria	c__Gammaproteobacteria	o__HOC36	f__norank_o__HOC36	g__norank_o__HOC36	s__uncultured_bacterium_g__norank_o__HOC36	OTU3111	0	0	0	0	4	2	0	2	2	1	4	2	0	5	3	5	2	0	0	0	0	0	4	0	2	1	1	40
d__Bacteria	k__norank_d__Bacteria	p__Actinobacteria	c__Actinobacteria	o__IMCC26256	f__norank_o__IMCC26256	g__norank_o__IMCC26256	s__uncultured_Acidimicrobidae_bacterium_g__norank_o__IMCC26256	OTU1251	2	4	1	2	7	4	4	2	1	0	6	5	2	7	7	5	1	3	1	7	0	11	8	0	7	2	3	102
d__Bacteria	k__norank_d__Bacteria	p__Actinobacteria	c__Actinobacteria	o__IMCC26256	f__norank_o__IMCC26256	g__norank_o__IMCC26256	s__uncultured_Acidimicrobiales_bacterium_g__norank_o__IMCC26256	OTU2412	0	3	2	1	1	1	0	0	0	2	6	2	1	2	1	4	0	5	1	5	2	3	2	0	3	0	0	47
d__Bacteria	k__norank_d__Bacteria	p__Actinobacteria	c__Actinobacteria	o__IMCC26256	f__norank_o__IMCC26256	g__norank_o__IMCC26256	s__uncultured_Ferrimicrobium_sp._g__norank	OTU676	0	0	0	0	0	2	1	0	0	0	2	4	2	3	3	2	1	6	1	3	4	3	1	1	5	0	1	45
d__Bacteria	k__norank_d__Bacteria	p__Actinobacteria	c__Actinobacteria	o__IMCC26256	f__norank_o__IMCC26256	g__norank_o__IMCC26256	s__metagenome_g__norank_o__IMCC26256	OTU4454	0	3	1	1	9	0	1	0	2	3	6	6	1	9	2	5	8	2	2	3	0	3	2	0	4	1	0	74
d__Bacteria	k__norank_d__Bacteria	p__Actinobacteria	c__Actinobacteria	o__IMCC26256	f__norank_o__IMCC26256	g__norank_o__IMCC26256	s__uncultured_Actinomycetales_bacterium_g__norank_o__IMCC26256	OTU1938	3	1	0	1	0	0	0	0	0	1	3	4	2	5	4	1	0	2	1	2	0	8	3	6	2	1	1	51
d__Bacteria	k__norank_d__Bacteria	p__Proteobacteria	c__Gammaproteobacteria	o__JG36-GS-52	f__norank_o__JG36-GS-52	g__norank_o__JG36-GS-52	s__unclassified_g__norank_o__JG36-GS-52	OTU228	4	1	3	1	7	1	0	2	4	0	1	1	0	8	5	2	3	0	1	4	2	3	2	0	2	1	1	59
d__Bacteria	k__norank_d__Bacteria	p__Proteobacteria	c__Gammaproteobacteria	o__JG36-GS-52	f__norank_o__JG36-GS-52	g__norank_o__JG36-GS-52	s__uncultured_gamma_proteobacterium_g__norank_o__JG36-GS-52	OTU779	15	15	14	2	18	19	5	5	16	4	27	29	3	22	27	5	9	10	13	25	3	39	7	15	45	21	14	427
d__Bacteria	k__norank_d__Bacteria	p__Proteobacteria	c__Gammaproteobacteria	o__KF-JG30-C25	f__norank_o__KF-JG30-C25	g__norank_o__KF-JG30-C25	s__uncultured_soil_bacterium_g__norank_o__KF-JG30-C25	OTU4412	2	0	18	0	0	0	20	3	2	7	3	0	7	3	1	3	7	81	13	1	20	13	1	2	5	1	15	228
d__Bacteria	k__norank_d__Bacteria	p__Proteobacteria	c__Gammaproteobacteria	o__KF-JG30-C25	f__norank_o__KF-JG30-C25	g__norank_o__KF-JG30-C25	s__uncultured_soil_bacterium_g__norank_o__KF-JG30-C25	OTU4593	3	1	14	2	1	3	12	1	1	5	2	0	8	2	0	1	3	73	15	0	9	13	1	1	2	0	12	185
d__Bacteria	k__norank_d__Bacteria	p__Proteobacteria	c__Gammaproteobacteria	o__KF-JG30-C25	f__norank_o__KF-JG30-C25	g__norank_o__KF-JG30-C25	s__uncultured_gamma_proteobacterium_g__norank_o__KF-JG30-C25	OTU4573	2	0	3	5	0	2	16	0	5	6	0	0	4	0	0	0	2	22	6	0	6	9	0	0	4	0	1	93
d__Bacteria	k__norank_d__Bacteria	p__Proteobacteria	c__Gammaproteobacteria	o__KF-JG30-C25	f__norank_o__KF-JG30-C25	g__norank_o__KF-JG30-C25	s__unclassified_g__norank_o__KF-JG30-C25	OTU3766	15	2	3	3	2	4	13	1	3	7	1	0	9	3	1	0	1	22	31	10	15	5	2	7	2	8	4	174
d__Bacteria	k__norank_d__Bacteria	p__Proteobacteria	c__Gammaproteobacteria	o__KF-JG30-C25	f__norank_o__KF-JG30-C25	g__norank_o__KF-JG30-C25	s__uncultured_bacterium_g__norank_o__KF-JG30-C25	OTU3816	198	31	124	11	14	10	107	36	11	60	8	6	170	18	2	4	1	82	73	81	100	4	20	42	4	90	221	1528
d__Bacteria	k__norank_d__Bacteria	p__Proteobacteria	c__Gammaproteobacteria	o__KI89A_clade	f__norank_o__KI89A_clade	g__norank_o__KI89A_clade	s__unclassified_g__norank_o__KI89A_clade	OTU3860	4	5	3	0	6	0	1	1	0	1	6	4	2	2	5	0	0	0	0	1	0	5	1	2	8	2	2	61
d__Bacteria	k__norank_d__Bacteria	p__Proteobacteria	c__Gammaproteobacteria	o__KI89A_clade	f__norank_o__KI89A_clade	g__norank_o__KI89A_clade	s__unclassified_g__norank_o__KI89A_clade	OTU3628	1	0	2	1	0	0	2	0	0	0	0	0	3	1	0	1	0	4	1	0	1	17	0	0	15	1	1	51
d__Bacteria	k__norank_d__Bacteria	p__Proteobacteria	c__Deltaproteobacteria	o__MBNT15	f__norank_o__MBNT15	g__norank_o__MBNT15	s__Actinobacteria_bacterium_RBG_13_63_9	OTU2323	0	0	1	0	3	0	0	0	1	0	2	3	0	3	1	4	5	0	1	2	0	2	0	1	3	0	1	33
d__Bacteria	k__norank_d__Bacteria	p__Proteobacteria	c__Deltaproteobacteria	o__MBNT15	f__norank_o__MBNT15	g__norank_o__MBNT15	s__uncultured_bacterium_g__norank_o__MBNT15	OTU2979	1	1	1	0	3	0	0	0	0	0	5	3	0	6	4	4	4	2	0	0	1	6	5	4	6	2	0	58
[truncated: 282 more rows]

## Sheet: OTU_Percent
Domain	Kingdom	Phylum	Class	Order	Family	Genus	Species	OTU	Before_1	Before_2	Before_3	N7D_1	N7D_2	N7D_3	N14D_1	N14D_2	N14D_3	N28D_1	N28D_2	N28D_3	N72D_1	N72D_2	N72D_3	S7D_1	S7D_2	S7D_3	S14D_1	S14D_2	S14D_3	S28D_1	S28D_2	S28D_3	S72D_1	S72D_2	S72D_3
[truncated: 1,881 more rows]
