# Supplementary material for: Changes in soil bacterial and fungal communities in response to Bacillus megaterium NCT-2 inoculation in secondary salinized soil
Source: PeerJ. 2021 Oct 12;9:e12309. doi: 10.7717/peerj.12309 (PMC8519178; doi:10.7717/peerj.12309)
Supplement: Supplemental Information 12 [file peerj-09-12309-s012.xls]

## Sheet: OTU
Domain	Kingdom	Phylum	Class	Order	Family	Genus	Species	OTU	Before_1	Before_2	Before_3	N7D_1	N7D_2	N7D_3	N14D_1	N14D_2	N14D_3	N28D_1	N28D_2	N28D_3	N72D_1	N72D_2	N72D_3	S7D_1	S7D_2	S7D_3	S14D_1	S14D_2	S14D_3	S28D_1	S28D_2	S28D_3	S72D_1	S72D_2	S72D_3	SUM
d__Eukaryota	k__Fungi	p__Basidiomycota	c__Tremellomycetes	o__Tremellales	f__Cryptococcaceae	g__Cryptococcus_f__Cryptococcaceae	s__Cryptococcus_heimaeyensis	OTU340	5	147	0	0	0	0	0	0	0	0	0	0	0	0	0	0	0	0	2	25	0	0	0	0	0	0	0	179
d__Eukaryota	k__Fungi	p__Zoopagomycota	c__unclassified_p__Zoopagomycota	o__unclassified_p__Zoopagomycota	f__unclassified_p__Zoopagomycota	g__unclassified_p__Zoopagomycota	s__Zoopagomycota_sp	OTU941	0	0	0	0	1	0	0	1	2	1	2	3	0	9	2	0	0	0	0	0	0	2	0	0	1	10	0	34
d__Eukaryota	k__Fungi	p__Ascomycota	c__unclassified_p__Ascomycota	o__unclassified_p__Ascomycota	f__unclassified_p__Ascomycota	g__unclassified_p__Ascomycota	s__unclassified_p__Ascomycota	OTU844	2	25	7	0	0	0	13	10	13	9	9	12	15	41	50	0	30	4	3	5	5	10	50	15	9	15	24	376
d__Eukaryota	k__Fungi	p__Basidiomycota	c__Tremellomycetes	o__Cystofilobasidiales	f__Mrakiaceae	g__Mrakia	s__Mrakia_blollopis	OTU1182	10	33	5	2	6	8	6	3	4	9	1	1	7	9	5	41	132	20	13	27	25	0	0	16	1	17	4	405
d__Eukaryota	k__Fungi	p__Zoopagomycota	c__Zoopagomycetes	o__Zoopagales	f__Zoopagaceae	g__Acaulopage	s__Acaulopage_sp	OTU766	0	0	12	0	0	0	0	0	0	0	0	0	0	0	0	0	12	19	0	0	0	4	18	0	0	0	55	120
d__Eukaryota	k__Fungi	p__unclassified_k__Fungi	c__unclassified_k__Fungi	o__unclassified_k__Fungi	f__unclassified_k__Fungi	g__unclassified_k__Fungi	s__unclassified_k__Fungi	OTU93	0	0	4	0	0	0	1	0	52	3	0	0	0	0	0	0	0	2	0	0	1	0	0	6	0	0	0	69
d__Eukaryota	k__Fungi	p__Basidiomycota	c__Tremellomycetes	o__Holtermanniales	f__Holtermanniales_fam_Incertae_sedis	g__Holtermanniella	s__Holtermanniella_sp	OTU467	1	14	0	0	3	1	0	0	1	0	0	0	0	0	0	0	14	4	2	7	2	0	3	3	1	8	4	68
d__Eukaryota	k__Fungi	p__Ascomycota	c__Leotiomycetes	o__Helotiales	f__unclassified_o__Helotiales	g__unclassified_o__Helotiales	s__unclassified_o__Helotiales	OTU407	0	1	0	0	0	0	0	0	0	0	0	0	0	0	0	17	4	2	0	0	0	0	0	0	0	1	0	25
d__Eukaryota	k__Fungi	p__unclassified_k__Fungi	c__unclassified_k__Fungi	o__unclassified_k__Fungi	f__unclassified_k__Fungi	g__unclassified_k__Fungi	s__unclassified_k__Fungi	OTU959	4	0	0	0	4	0	9	1	0	1	5	0	5	0	34	6	0	0	17	0	0	1	0	5	98	0	0	190
d__Eukaryota	k__Fungi	p__Basidiomycota	c__Wallemiomycetes	o__Wallemiales	f__Wallemiaceae	g__Wallemia	s__unclassified_g__Wallemia	OTU707	10	1	11	4	2	71	10	21	17	8	56	12	10	19	10	394	233	445	222	84	148	66	467	88	52	44	19	2524
d__Eukaryota	k__Fungi	p__Basidiomycota	c__Tremellomycetes	o__Trichosporonales	f__Trichosporonaceae	g__Trichosporon	s__unclassified_g__Trichosporon	OTU1267	14	15	32	19	6	2	0	6	0	4	2	0	2	0	3	8	12	3	2	2	1	2	3	2	3	2	28	173
d__Eukaryota	k__Fungi	p__Ascomycota	c__Eurotiomycetes	o__Eurotiales	f__Aspergillaceae	g__Aspergillus	s__Aspergillus_minisclerotigenes	OTU976	0	0	0	0	0	0	0	1	0	0	0	0	0	1	0	8	0	0	0	1	0	0	0	0	4	2	4	21
d__Eukaryota	k__Fungi	p__Ascomycota	c__Dothideomycetes	o__Pleosporales	f__Didymellaceae	g__unclassified_f__Didymellaceae	s__unclassified_f__Didymellaceae	OTU846	0	5	1	2	0	1	0	0	0	0	0	2	0	0	0	0	6	0	2	5	0	2	18	0	4	10	10	68
d__Eukaryota	k__Fungi	p__Basidiomycota	c__Tremellomycetes	o__Filobasidiales	f__Filobasidiaceae	g__Naganishia	s__Naganishia_sp	OTU576	0	0	0	0	0	1	0	0	0	0	0	0	0	0	0	0	0	2	6	0	0	0	0	0	3	0	0	12
d__Eukaryota	k__Fungi	p__Basidiomycota	c__Malasseziomycetes	o__Malasseziales	f__unclassified_o__Malasseziales	g__unclassified_o__Malasseziales	s__Malasseziales_sp	OTU574	0	0	3	2	0	0	0	0	0	1	0	2	0	0	0	0	0	0	1	5	0	0	0	0	0	0	3	17
d__Eukaryota	k__Fungi	p__Basidiomycota	c__Tremellomycetes	o__Trichosporonales	f__Trichosporonaceae	g__Cutaneotrichosporon	s__Cutaneotrichosporon_curvatus	OTU453	82	115	72	32	24	7	3	34	23	1	17	0	1	30	6	57	53	47	19	85	10	68	39	33	27	50	46	981
d__Eukaryota	k__Fungi	p__Ascomycota	c__Leotiomycetes	o__Helotiales	f__unclassified_o__Helotiales	g__unclassified_o__Helotiales	s__unclassified_o__Helotiales	OTU664	94	285	130	0	0	0	0	0	0	0	0	0	0	0	0	64	305	42	70	161	3	1	30	39	64	121	45	1454
d__Eukaryota	k__Fungi	p__Ascomycota	c__Eurotiomycetes	o__Eurotiales	f__Aspergillaceae	g__Penicillium	s__Penicillium_digitatum	OTU125	1	0	0	0	0	0	0	0	0	0	1	1	0	0	0	0	1	0	0	2	0	1	0	0	0	6	0	13
d__Eukaryota	k__Fungi	p__Mortierellomycota	c__Mortierellomycetes	o__Mortierellales	f__Mortierellaceae	g__Mortierella	s__Mortierella_ambigua	OTU427	2	3	12	2	3	5	2	0	4	0	13	2	4	3	1	0	0	0	1	0	2	7	11	0	10	12	0	99
d__Eukaryota	k__Fungi	p__Ascomycota	c__Sordariomycetes	o__Hypocreales	f__Hypocreales_fam_Incertae_sedis	g__Chlamydocillium	s__Chlamydocillium_sp	OTU195	73	120	36	15	42	37	25	32	49	36	140	85	99	205	103	14	53	53	18	75	42	47	82	90	252	58	33	1914
d__Eukaryota	k__Fungi	p__Basidiomycota	c__Tremellomycetes	o__Trichosporonales	f__Trichosporonaceae	g__Cutaneotrichosporon	s__Cutaneotrichosporon_sp	OTU1247	0	0	0	0	0	0	0	0	0	0	0	0	0	0	0	0	17	4	3	8	0	0	0	5	14	0	28	79
d__Eukaryota	k__Fungi	p__Ascomycota	c__Eurotiomycetes	o__Eurotiales	f__Aspergillaceae	g__Aspergillus	s__unclassified_g__Aspergillus	OTU193	0	0	0	0	0	1	0	2	0	1	0	0	1	2	1	4	0	2	1	7	1	5	0	2	4	0	0	34
d__Eukaryota	k__Fungi	p__Ascomycota	c__Leotiomycetes	o__Helotiales	f__Sclerotiniaceae	g__Sclerotinia	s__unclassified_g__Sclerotinia	OTU385	243	46	59	0	3	1	6	6	18	14	11	20	16	45	14	13	101	14	2	136	7	9	6	38	24	34	12	898
d__Eukaryota	k__Fungi	p__unclassified_k__Fungi	c__unclassified_k__Fungi	o__unclassified_k__Fungi	f__unclassified_k__Fungi	g__unclassified_k__Fungi	s__unclassified_k__Fungi	OTU372	7	0	0	0	0	0	0	0	0	0	0	0	0	0	0	9	0	0	0	8	0	0	0	0	9	10	0	43
d__Eukaryota	k__Fungi	p__unclassified_k__Fungi	c__unclassified_k__Fungi	o__unclassified_k__Fungi	f__unclassified_k__Fungi	g__unclassified_k__Fungi	s__unclassified_k__Fungi	OTU279	0	0	0	40	33	15	24	310	0	4	30	5	19	1	2	0	0	5	0	2	9	3	24	35	3	51	3	618
d__Eukaryota	k__Fungi	p__Zoopagomycota	c__Zoopagomycetes	o__Zoopagales	f__Zoopagaceae	g__Acaulopage	s__Acaulopage_sp	OTU746	0	0	0	0	2	6	7	4	9	106	34	12	5	0	15	1	0	0	6	1	15	20	83	9	15	9	15	374
d__Eukaryota	k__Fungi	p__unclassified_k__Fungi	c__unclassified_k__Fungi	o__unclassified_k__Fungi	f__unclassified_k__Fungi	g__unclassified_k__Fungi	s__unclassified_k__Fungi	OTU789	0	0	0	0	0	0	0	0	8	0	0	0	1	15	11	0	0	0	0	0	2	4	0	0	0	5	0	46
d__Eukaryota	k__Fungi	p__Ascomycota	c__unclassified_p__Ascomycota	o__unclassified_p__Ascomycota	f__unclassified_p__Ascomycota	g__unclassified_p__Ascomycota	s__unclassified_p__Ascomycota	OTU400	0	16	1	0	0	0	0	0	0	0	0	0	0	0	0	0	0	0	0	0	1	0	0	4	3	5	9	39
d__Eukaryota	k__Fungi	p__Ascomycota	c__unclassified_p__Ascomycota	o__unclassified_p__Ascomycota	f__unclassified_p__Ascomycota	g__unclassified_p__Ascomycota	s__unclassified_p__Ascomycota	OTU402	0	29	8	0	0	0	0	0	0	0	0	0	0	0	0	10	0	0	2	0	0	0	23	0	33	25	0	130
d__Eukaryota	k__Fungi	p__Basidiomycota	c__Tremellomycetes	o__Tremellales	f__unclassified_o__Tremellales	g__unclassified_o__Tremellales	s__unclassified_o__Tremellales	OTU595	19	24	34	2	2	3	3	0	0	0	0	0	0	0	0	6	39	0	40	14	0	0	0	0	6	0	0	192
d__Eukaryota	k__Fungi	p__unclassified_k__Fungi	c__unclassified_k__Fungi	o__unclassified_k__Fungi	f__unclassified_k__Fungi	g__unclassified_k__Fungi	s__unclassified_k__Fungi	OTU753	0	0	0	0	0	0	0	0	13	0	0	0	0	0	0	0	0	0	0	0	0	19	0	0	4	0	0	36
d__Eukaryota	k__Fungi	p__unclassified_k__Fungi	c__unclassified_k__Fungi	o__unclassified_k__Fungi	f__unclassified_k__Fungi	g__unclassified_k__Fungi	s__unclassified_k__Fungi	OTU870	0	0	0	0	0	0	0	0	0	0	0	0	0	0	0	9	19	8	0	0	0	0	0	5	0	0	0	41
d__Eukaryota	k__Fungi	p__unclassified_k__Fungi	c__unclassified_k__Fungi	o__unclassified_k__Fungi	f__unclassified_k__Fungi	g__unclassified_k__Fungi	s__unclassified_k__Fungi	OTU652	7	0	0	0	0	0	0	0	0	0	0	0	0	0	0	8	64	0	0	7	10	6	38	0	9	5	70	224
d__Eukaryota	k__Fungi	p__Basidiomycota	c__Microbotryomycetes	o__Leucosporidiales	f__Leucosporidiaceae	g__Leucosporidium	s__Leucosporidium_intermedium	OTU263	0	0	0	2	2	3	1	1	5	0	4	5	124	16	3505	9	14	6	15	0	2	4	37	4	92	90	8	3949
d__Eukaryota	k__Fungi	p__Ascomycota	c__Eurotiomycetes	o__Eurotiales	f__Aspergillaceae	g__Penicillium	s__unclassified_g__Penicillium	OTU380	2	0	6	0	0	6	12	0	4	4	0	0	5	7	1	5	8	0	2	3	238	1	0	5	13	0	0	322
d__Eukaryota	k__Fungi	p__Ascomycota	c__Sordariomycetes	o__Sordariales	f__Lasiosphaeriaceae	g__Arnium	s__Arnium_sp	OTU974	373	594	380	0	0	0	0	0	0	0	0	0	0	0	0	162	895	113	133	304	19	56	311	89	265	293	499	4486
d__Eukaryota	k__Fungi	p__Ascomycota	c__Dothideomycetes	o__Pleosporales	f__Pleosporaceae	g__Stemphylium	s__Stemphylium_lycopersici	OTU63	103	50	81	228	19	86	97	61	456	94	20	47	78	0	1	40	41	76	44	50	88	8	50	326	4	68	79	2295
d__Eukaryota	k__Fungi	p__Basidiomycota	c__Tremellomycetes	o__Cystofilobasidiales	f__unclassified_o__Cystofilobasidiales	g__unclassified_o__Cystofilobasidiales	s__unclassified_o__Cystofilobasidiales	OTU440	0	6	0	0	0	0	0	0	0	0	0	0	0	0	0	2	5	0	0	0	0	0	0	0	0	0	0	13
d__Eukaryota	k__Fungi	p__unclassified_k__Fungi	c__unclassified_k__Fungi	o__unclassified_k__Fungi	f__unclassified_k__Fungi	g__unclassified_k__Fungi	s__unclassified_k__Fungi	OTU392	0	25	0	0	0	0	2	0	0	1	14	3	2	0	2	0	0	1	0	4	1	0	3	7	0	5	2	72
d__Eukaryota	k__Fungi	p__Mortierellomycota	c__Mortierellomycetes	o__Mortierellales	f__Mortierellaceae	g__Mortierella	s__Mortierella_indohii	OTU31	174	202	282	146	1	4	21	1	1	81	0	2	53	0	2	0	1	20	2	24	6	21	5	156	2	34	14	1255
d__Eukaryota	k__Fungi	p__unclassified_k__Fungi	c__unclassified_k__Fungi	o__unclassified_k__Fungi	f__unclassified_k__Fungi	g__unclassified_k__Fungi	s__unclassified_k__Fungi	OTU396	6	41	0	1	5	1	1	0	15	3	14	6	0	12	13	4	0	2	0	17	2	0	5	175	1	1	29	354
d__Eukaryota	k__Fungi	p__unclassified_k__Fungi	c__unclassified_k__Fungi	o__unclassified_k__Fungi	f__unclassified_k__Fungi	g__unclassified_k__Fungi	s__unclassified_k__Fungi	OTU768	0	0	0	1	6	37	4	9	4	1	0	5	0	12	48	0	0	1	10	1	2	198	0	0	3	9	0	351
d__Eukaryota	k__Fungi	p__Basidiomycota	c__Agaricomycetes	o__Tremellodendropsidales	f__unclassified_o__Tremellodendropsidales	g__unclassified_o__Tremellodendropsidales	s__Tremellodendropsidales_sp	OTU338	12	75	50	0	0	0	0	0	0	0	0	0	0	0	0	16	17	9	4	5	2	1	17	2	0	7	6	223
d__Eukaryota	k__Fungi	p__unclassified_k__Fungi	c__unclassified_k__Fungi	o__unclassified_k__Fungi	f__unclassified_k__Fungi	g__unclassified_k__Fungi	s__unclassified_k__Fungi	OTU822	0	0	0	0	0	0	0	0	0	0	0	0	0	0	0	9	0	0	0	0	0	0	8	0	0	0	17	34
d__Eukaryota	k__Fungi	p__Ascomycota	c__Sordariomycetes	o__Glomerellales	f__Plectosphaerellaceae	g__Gibellulopsis	s__Gibellulopsis_nigrescens	OTU112	4494	1158	2936	1579	2269	7481	1165	5804	7005	1325	9167	2972	2652	3232	1718	2622	1661	3382	2052	6955	2098	1581	3998	3274	1628	3024	3919	91151
d__Eukaryota	k__Fungi	p__Ascomycota	c__Dothideomycetes	o__Pleosporales	f__Melanommataceae	g__Pleotrichocladium	s__Pleotrichocladium_opacum	OTU458	0	11	19	0	0	0	0	0	0	0	0	0	0	0	0	9	0	0	1	0	0	0	0	0	0	4	0	44
d__Eukaryota	k__Fungi	p__Ascomycota	c__Eurotiomycetes	o__Onygenales	f__unclassified_o__Onygenales	g__unclassified_o__Onygenales	s__unclassified_o__Onygenales	OTU708	2	8	0	0	0	0	0	0	1	0	0	1	1	0	0	0	5	0	0	1	0	0	0	1	7	0	0	27
d__Eukaryota	k__Fungi	p__unclassified_k__Fungi	c__unclassified_k__Fungi	o__unclassified_k__Fungi	f__unclassified_k__Fungi	g__unclassified_k__Fungi	s__unclassified_k__Fungi	OTU757	0	0	0	23	0	0	7	0	0	0	0	0	13	0	0	0	0	0	0	0	0	55	0	0	31	0	0	129
d__Eukaryota	k__Fungi	p__Ascomycota	c__Eurotiomycetes	o__Eurotiales	f__Trichocomaceae	g__Talaromyces	s__Talaromyces_liani	OTU350	4	0	5	0	0	0	0	0	0	0	0	0	1	0	0	12	16	1	2	13	0	0	0	0	0	6	2	62
d__Eukaryota	k__Fungi	p__Ascomycota	c__Sordariomycetes	o__Microascales	f__Microascaceae	g__Lophotrichus	s__Lophotrichus_plumbescens	OTU502	4	3	14	0	2	2	1	1	5	20	4	0	10	4	5	0	0	3	0	5	5	3	1	11	12	3	0	118
d__Eukaryota	k__Fungi	p__Ascomycota	c__Dothideomycetes	o__Pleosporales	f__Didymellaceae	g__Didymella	s__Didymella_heteroderae	OTU398	19	24	6	0	0	0	0	0	0	1	0	0	0	0	0	31	0	16	2	0	2	2	0	9	9	46	0	167
d__Eukaryota	k__Fungi	p__unclassified_k__Fungi	c__unclassified_k__Fungi	o__unclassified_k__Fungi	f__unclassified_k__Fungi	g__unclassified_k__Fungi	s__unclassified_k__Fungi	OTU914	0	0	0	0	0	0	0	5	1	0	0	2	0	0	0	0	0	0	2	2	0	1	7	0	7	9	0	36
d__Eukaryota	k__Fungi	p__Ascomycota	c__Leotiomycetes	o__Helotiales	f__Helotiales_fam_Incertae_sedis	g__Acidomelania	s__Acidomelania_panicicola	OTU1253	21	20	35	0	0	0	0	0	0	0	0	0	0	0	0	19	108	7	3	30	1	0	12	5	7	13	26	307
d__Eukaryota	k__Fungi	p__Basidiomycota	c__Agaricomycetes	o__Russulales	f__Russulaceae	g__Russula	s__unclassified_g__Russula	OTU817	0	50	2	0	0	0	0	0	0	0	0	0	0	0	0	13	25	7	1	0	0	0	12	0	0	29	17	156
d__Eukaryota	k__Fungi	p__Ascomycota	c__Sordariomycetes	o__Chaetosphaeriales	f__Chaetosphaeriaceae	g__Gonytrichum	s__Gonytrichum_macrocladum_var._terricola	OTU450	12	14	10	0	0	0	0	0	0	0	0	0	0	0	0	0	26	2	0	6	0	0	1	5	11	5	0	92
d__Eukaryota	k__Fungi	p__Ascomycota	c__Eurotiomycetes	o__Eurotiales	f__Aspergillaceae	g__Aspergillus	s__Aspergillus_amstelodami	OTU422	8	38	24	5	1	0	1	1	0	3	2	7	6	0	4	19	15	1	8	6	11	2	9	0	11	17	24	223
d__Eukaryota	k__Fungi	p__Ascomycota	c__Sordariomycetes	o__Glomerellales	f__Plectosphaerellaceae	g__unclassified_f__Plectosphaerellaceae	s__unclassified_f__Plectosphaerellaceae	OTU686	3	1	1	55	134	203	84	167	98	25	98	38	89	21	19	12	1	36	19	9	67	11	15	32	15	5	9	1267
d__Eukaryota	k__Fungi	p__unclassified_k__Fungi	c__unclassified_k__Fungi	o__unclassified_k__Fungi	f__unclassified_k__Fungi	g__unclassified_k__Fungi	s__unclassified_k__Fungi	OTU990	0	0	0	0	6	0	0	0	3	0	1	0	0	0	6	0	0	0	0	0	0	0	0	0	0	0	0	16
d__Eukaryota	k__Fungi	p__Ascomycota	c__Orbiliomycetes	o__Orbiliales	f__Orbiliales_fam_Incertae_sedis	g__Vermispora	s__Vermispora_spermatophaga	OTU1004	2	0	1	0	0	0	0	0	1	2	0	0	0	0	0	0	0	0	0	0	0	0	0	4	0	14	0	24
d__Eukaryota	k__Fungi	p__Basidiomycota	c__Ustilaginomycetes	o__Ustilaginales	f__Ustilaginaceae	g__Moesziomyces	s__Moesziomyces_sp	OTU5	52	3	69	0	0	7	2	10	5	4	2	3	18	4	1	19	2	2	1	0	57	0	0	7	1	8	0	277
d__Eukaryota	k__Fungi	p__unclassified_k__Fungi	c__unclassified_k__Fungi	o__unclassified_k__Fungi	f__unclassified_k__Fungi	g__unclassified_k__Fungi	s__unclassified_k__Fungi	OTU336	550	0	119	45	0	5	112	0	0	0	0	0	64	0	4	5	1	105	0	0	616	38	0	22	0	0	1	1687
d__Eukaryota	k__Fungi	p__Ascomycota	c__Sordariomycetes	o__Hypocreales	f__Nectriaceae	g__Fusarium	s__unclassified_g__Fusarium	OTU186	702	680	700	73	504	671	732	257	507	646	373	233	1085	504	299	263	651	713	370	542	587	388	299	1274	1234	605	358	15250
d__Eukaryota	k__Fungi	p__unclassified_k__Fungi	c__unclassified_k__Fungi	o__unclassified_k__Fungi	f__unclassified_k__Fungi	g__unclassified_k__Fungi	s__unclassified_k__Fungi	OTU1130	80	0	0	12	0	0	0	0	2	0	0	0	0	0	26	0	28	86	0	0	13	0	0	0	0	0	345	592
d__Eukaryota	k__Fungi	p__Basidiomycota	c__Tremellomycetes	o__Cystofilobasidiales	f__Cystofilobasidiaceae	g__Cystofilobasidium	s__Cystofilobasidium_macerans	OTU252	0	10	6	1	4	0	1	1	1	0	0	0	4	0	130	0	9	0	0	0	0	1	1	5	21	29	8	232
d__Eukaryota	k__Fungi	p__unclassified_k__Fungi	c__unclassified_k__Fungi	o__unclassified_k__Fungi	f__unclassified_k__Fungi	g__unclassified_k__Fungi	s__unclassified_k__Fungi	OTU962	4	0	9	0	0	0	0	0	0	0	0	0	0	2	0	0	0	0	12	0	0	0	0	0	8	0	1	36
d__Eukaryota	k__Fungi	p__Chytridiomycota	c__unclassified_p__Chytridiomycota	o__unclassified_p__Chytridiomycota	f__unclassified_p__Chytridiomycota	g__unclassified_p__Chytridiomycota	s__unclassified_p__Chytridiomycota	OTU678	29	7	0	0	0	0	2	0	0	0	0	1	0	7	5	1	2	0	1	1	18	0	0	9	0	14	0	97
d__Eukaryota	k__Fungi	p__Basidiomycota	c__unclassified_p__Basidiomycota	o__unclassified_p__Basidiomycota	f__unclassified_p__Basidiomycota	g__unclassified_p__Basidiomycota	s__unclassified_p__Basidiomycota	OTU1075	2	0	0	0	0	0	0	0	0	0	0	0	0	1	0	0	36	3	0	0	1	0	0	0	0	0	11	54
d__Eukaryota	k__Fungi	p__Ascomycota	c__Sordariomycetes	o__Hypocreales	f__Hypocreales_fam_Incertae_sedis	g__Emericellopsis	s__unclassified_g__Emericellopsis	OTU546	1	3	7	0	0	2	3	0	0	2	0	1	6	1	2	0	0	8	2	5	72	9	4	20	49	0	3	200
d__Eukaryota	k__Fungi	p__Rozellomycota	c__unclassified_p__Rozellomycota	o__unclassified_p__Rozellomycota	f__unclassified_p__Rozellomycota	g__unclassified_p__Rozellomycota	s__Rozellomycota_sp	OTU963	0	0	0	1	0	0	1	2	0	0	0	0	5	0	0	1	0	0	21	0	1	0	0	0	1	0	0	33
d__Eukaryota	k__Fungi	p__Rozellomycota	c__unclassified_p__Rozellomycota	o__unclassified_p__Rozellomycota	f__unclassified_p__Rozellomycota	g__unclassified_p__Rozellomycota	s__Rozellomycota_sp	OTU13	0	0	0	0	0	0	13	0	0	0	5	0	0	0	6	0	0	2	0	0	0	0	0	0	0	0	0	26
d__Eukaryota	k__Fungi	p__unclassified_k__Fungi	c__unclassified_k__Fungi	o__unclassified_k__Fungi	f__unclassified_k__Fungi	g__unclassified_k__Fungi	s__unclassified_k__Fungi	OTU137	0	0	0	3	0	0	12	0	0	15	5	1	3	0	0	0	0	0	1	0	13	1	2	7	0	0	0	63
d__Eukaryota	k__Fungi	p__Ascomycota	c__Sordariomycetes	o__Microascales	f__Microascaceae	g__Microascus	s__Microascus_brevicaulis	OTU715	0	1	0	0	0	0	1	0	1	1	0	0	3	0	1	0	0	0	0	0	4	0	0	1	7	1	1	22
d__Eukaryota	k__Fungi	p__Glomeromycota	c__Glomeromycetes	o__Diversisporales	f__Diversisporales_fam_Incertae_sedis	g__Entrophospora	s__Entrophospora_infrequens	OTU429	27	49	14	0	0	0	0	0	0	0	0	0	0	0	0	8	0	0	0	20	0	0	16	0	0	0	0	134
d__Eukaryota	k__Fungi	p__Basidiomycota	c__Exobasidiomycetes	o__Golubeviales	f__Golubeviaceae	g__Golubevia	s__Golubevia_sp	OTU1154	21	6	66	4	5	1	0	4	4	0	0	1	0	1	5	57	3	2	2	1	32	2	0	1	2	2	0	222
d__Eukaryota	k__Fungi	p__Ascomycota	c__Sordariomycetes	o__Sordariales	f__Lasiosphaeriaceae	g__Podospora	s__Podospora_ellisiana	OTU489	0	11	28	0	0	0	0	0	0	0	0	0	0	0	0	0	19	7	8	7	0	0	2	8	0	5	0	95
d__Eukaryota	k__Fungi	p__unclassified_k__Fungi	c__unclassified_k__Fungi	o__unclassified_k__Fungi	f__unclassified_k__Fungi	g__unclassified_k__Fungi	s__unclassified_k__Fungi	OTU1266	0	0	0	0	0	0	3	0	0	0	0	0	1	0	14	0	9	0	2	0	1	2	0	0	7	0	0	39
d__Eukaryota	k__Fungi	p__Ascomycota	c__Sordariomycetes	o__Glomerellales	f__Plectosphaerellaceae	g__Plectosphaerella	s__unclassified_g__Plectosphaerella	OTU782	1014	355	609	5562	12261	5419	10470	6395	2853	1409	1816	1694	4761	825	1050	8094	4011	6592	2957	1754	7146	2229	1727	3710	1369	1122	1206	98410
d__Eukaryota	k__Fungi	p__Chytridiomycota	c__GS13	o__unclassified_c__GS13	f__unclassified_c__GS13	g__unclassified_c__GS13	s__GS13_sp	OTU1321	3	0	0	0	0	0	0	0	0	0	0	0	0	15	1	3	15	7	0	2	1	0	3	0	3	10	0	63
d__Eukaryota	k__Fungi	p__Blastocladiomycota	c__Blastocladiomycetes	o__Blastocladiales	f__Physodermataceae	g__Paraphysoderma	s__Paraphysoderma_sedebokerense	OTU508	4	2	8	0	0	1	0	0	3	0	0	0	0	0	0	2	8	3	1	0	1	0	0	0	2	6	0	41
d__Eukaryota	k__Fungi	p__Mortierellomycota	c__Mortierellomycetes	o__Mortierellales	f__Mortierellaceae	g__Mortierella	s__Mortierella_hyalina	OTU602	2	0	0	0	0	0	0	0	0	0	0	0	0	0	0	0	13	0	3	0	0	0	0	0	0	0	1	19
d__Eukaryota	k__Fungi	p__Basidiomycota	c__Tremellomycetes	o__Tremellales	f__Bulleribasidiaceae	g__Vishniacozyma	s__Vishniacozyma_sp	OTU824	16	0	38	0	0	0	0	0	0	0	0	0	0	0	0	0	0	14	1	0	4	0	29	19	0	0	0	121
d__Eukaryota	k__Fungi	p__Chytridiomycota	c__unclassified_p__Chytridiomycota	o__unclassified_p__Chytridiomycota	f__unclassified_p__Chytridiomycota	g__unclassified_p__Chytridiomycota	s__unclassified_p__Chytridiomycota	OTU251	0	0	0	1	0	2	0	0	11	6	3	1	0	10	6	0	0	0	0	0	0	3	0	0	14	0	0	57
d__Eukaryota	k__Fungi	p__Ascomycota	c__Sordariomycetes	o__Sordariales	f__Lasiosphaeriaceae	g__unclassified_f__Lasiosphaeriaceae	s__unclassified_f__Lasiosphaeriaceae	OTU1021	4	7	2	0	0	0	1	0	1	2	0	0	2	0	0	17	48	0	1	6	2	1	0	6	10	8	2	120
d__Eukaryota	k__Fungi	p__unclassified_k__Fungi	c__unclassified_k__Fungi	o__unclassified_k__Fungi	f__unclassified_k__Fungi	g__unclassified_k__Fungi	s__unclassified_k__Fungi	OTU1	0	0	0	51	0	0	57	0	6	0	0	0	1	0	2	18	2	2	28	2	1	8	0	23	44	11	44	300
d__Eukaryota	k__Fungi	p__Ascomycota	c__Sordariomycetes	o__Hypocreales	f__Hypocreales_fam_Incertae_sedis	g__Acremonium	s__Acremonium_sclerotigenum	OTU173	268	47	406	4	15	24	39	13	18	37	5	5	26	36	3	53	75	38	16	93	95	21	7	133	7	105	22	1611
d__Eukaryota	k__Fungi	p__Ascomycota	c__Sordariomycetes	o__Sordariales	f__unclassified_o__Sordariales	g__unclassified_o__Sordariales	s__unclassified_o__Sordariales	OTU919	0	0	4	0	0	0	1	0	0	1	0	0	2	1	1	0	0	1	1	9	2	1	1	3	37	7	8	80
d__Eukaryota	k__Fungi	p__unclassified_k__Fungi	c__unclassified_k__Fungi	o__unclassified_k__Fungi	f__unclassified_k__Fungi	g__unclassified_k__Fungi	s__unclassified_k__Fungi	OTU869	0	0	7	0	0	0	0	0	0	0	0	0	0	0	0	0	0	0	0	0	0	0	0	3	0	2	0	12
d__Eukaryota	k__Fungi	p__Basidiomycota	c__Agaricomycetes	o__Agaricales	f__Tricholomataceae	g__Arrhenia	s__Arrhenia_obatra	OTU355	4	0	0	0	0	0	0	0	0	0	0	0	0	0	0	2	0	2	1	0	0	0	1	0	1	9	3	23
d__Eukaryota	k__Fungi	p__Ascomycota	c__Sordariomycetes	o__Hypocreales	f__Nectriaceae	g__Fusarium	s__unclassified_g__Fusarium	OTU742	1	0	1	0	3	0	0	0	0	2	0	1	35	0	2	17	2	4	0	7	4	0	1	7	0	3	6	96
d__Eukaryota	k__Fungi	p__Ascomycota	c__unclassified_p__Ascomycota	o__unclassified_p__Ascomycota	f__unclassified_p__Ascomycota	g__unclassified_p__Ascomycota	s__unclassified_p__Ascomycota	OTU525	0	0	8	0	0	0	0	0	0	0	0	0	0	0	0	10	0	0	0	0	0	0	0	0	0	0	33	51
d__Eukaryota	k__Fungi	p__unclassified_k__Fungi	c__unclassified_k__Fungi	o__unclassified_k__Fungi	f__unclassified_k__Fungi	g__unclassified_k__Fungi	s__unclassified_k__Fungi	OTU210	9	0	0	0	97	1	0	6	1	0	56	0	0	491	1	0	6	0	2	27	2	7	16	0	32	24	1	779
d__Eukaryota	k__Fungi	p__unclassified_k__Fungi	c__unclassified_k__Fungi	o__unclassified_k__Fungi	f__unclassified_k__Fungi	g__unclassified_k__Fungi	s__unclassified_k__Fungi	OTU12	0	0	0	1	0	3	3	0	1	3	0	1	3	1	0	0	0	0	0	0	11	32	0	0	8	0	3	70
d__Eukaryota	k__Fungi	p__unclassified_k__Fungi	c__unclassified_k__Fungi	o__unclassified_k__Fungi	f__unclassified_k__Fungi	g__unclassified_k__Fungi	s__unclassified_k__Fungi	OTU10	0	0	0	0	0	10	6	0	0	0	1	0	0	0	0	0	0	0	0	0	0	0	0	0	6	0	0	23
d__Eukaryota	k__Fungi	p__Ascomycota	c__Leotiomycetes	o__Thelebolales	f__Pseudeurotiaceae	g__Pseudeurotium	s__Pseudeurotium_sp	OTU327	0	0	10	0	1	6	1	1	5	20	2	3	0	13	5	0	0	1	3	4	0	1	0	3	13	4	0	96
d__Eukaryota	k__Fungi	p__Ascomycota	c__Sordariomycetes	o__unclassified_c__Sordariomycetes	f__unclassified_c__Sordariomycetes	g__unclassified_c__Sordariomycetes	s__unclassified_c__Sordariomycetes	OTU762	0	0	0	0	0	0	0	0	0	0	0	0	0	3	0	0	0	0	0	0	20	15	0	0	26	0	0	64
d__Eukaryota	k__Fungi	p__Ascomycota	c__Sordariomycetes	o__Hypocreales	f__Nectriaceae	g__Gibberella	s__Gibberella_intricans	OTU951	828	157	804	44	225	132	427	177	158	161	211	524	311	1210	140	92	162	275	142	179	337	199	263	644	270	328	425	8825
d__Eukaryota	k__Fungi	p__Ascomycota	c__Sordariomycetes	o__Hypocreales	f__Nectriaceae	g__unclassified_f__Nectriaceae	s__unclassified_f__Nectriaceae	OTU568	1	0	0	0	1	0	3	2	0	0	1	0	2	4	0	0	0	0	1	0	1	0	0	8	2	0	0	26
d__Eukaryota	k__Fungi	p__Basidiomycota	c__Tremellomycetes	o__Trichosporonales	f__Trichosporonaceae	g__Cutaneotrichosporon	s__unclassified_g__Cutaneotrichosporon	OTU365	23	57	91	11	6	2	4	3	13	3	50	2	0	0	4	32	0	39	0	36	9	8	1	3	17	0	18	432
d__Eukaryota	k__Fungi	p__unclassified_k__Fungi	c__unclassified_k__Fungi	o__unclassified_k__Fungi	f__unclassified_k__Fungi	g__unclassified_k__Fungi	s__unclassified_k__Fungi	OTU83	165	484	170	85	0	1	13	14	594	213	40	4	7	3	223	0	7	94	232	0	37	72	17	58	61	5	231	2830
d__Eukaryota	k__Fungi	p__unclassified_k__Fungi	c__unclassified_k__Fungi	o__unclassified_k__Fungi	f__unclassified_k__Fungi	g__unclassified_k__Fungi	s__unclassified_k__Fungi	OTU87	0	0	16	0	1	7	230	8	117	8180	0	119	13	0	0	124	0	32	479	20	133	89	28	561	0	0	12	10169
d__Eukaryota	k__Fungi	p__unclassified_k__Fungi	c__unclassified_k__Fungi	o__unclassified_k__Fungi	f__unclassified_k__Fungi	g__unclassified_k__Fungi	s__unclassified_k__Fungi	OTU920	0	5	0	0	0	0	0	0	3	0	5	0	2	1	1	0	0	0	0	0	3	0	1	0	3	0	0	24
d__Eukaryota	k__Fungi	p__Ascomycota	c__Dothideomycetes	o__Pleosporales	f__Corynesporascaceae	g__Corynespora	s__Corynespora_cassiicola	OTU523	0	0	34	2	0	0	0	4	0	0	1	0	5	5	0	0	0	0	4	0	0	0	1	0	0	0	0	56
d__Eukaryota	k__Fungi	p__Ascomycota	c__Leotiomycetes	o__Thelebolales	f__Pseudeurotiaceae	g__Pseudeurotium	s__Pseudeurotium_sp	OTU234	1	9	8	0	0	1	1	0	0	0	0	0	2	4	2	0	0	5	0	1	3	0	0	2	4	0	3	46
d__Eukaryota	k__Fungi	p__unclassified_k__Fungi	c__unclassified_k__Fungi	o__unclassified_k__Fungi	f__unclassified_k__Fungi	g__unclassified_k__Fungi	s__unclassified_k__Fungi	OTU1151	0	0	0	0	0	2	2	0	4	4	0	13	11	0	0	2	0	0	26	6	0	10	0	0	24	0	0	104
d__Eukaryota	k__Fungi	p__Basidiomycota	c__Wallemiomycetes	o__Wallemiales	f__Wallemiaceae	g__Wallemia	s__Wallemia_hederae	OTU706	0	0	0	0	0	0	0	0	0	0	0	0	0	0	0	21	0	15	10	0	1	5	0	0	1	0	0	53
d__Eukaryota	k__Fungi	p__Mortierellomycota	c__Mortierellomycetes	o__Mortierellales	f__Mortierellaceae	g__Mortierella	s__Mortierella_alpina	OTU418	2	13	0	2	0	0	1	0	0	0	0	0	0	5	2	4	0	0	0	0	0	0	0	0	2	0	0	31
d__Eukaryota	k__Fungi	p__Ascomycota	c__Leotiomycetes	o__Helotiales	f__Helotiaceae	g__Scytalidium	s__Scytalidium_lignicola	OTU913	0	0	0	0	0	0	0	5	0	1	0	1	1	0	0	0	0	2	2	3	0	0	1	0	16	0	0	32
d__Eukaryota	k__Fungi	p__Ascomycota	c__Sordariomycetes	o__Sordariales	f__Chaetomiaceae	g__Mycothermus	s__Mycothermus_sp	OTU86	7	0	1	0	8	0	0	1	0	1	2	2	3	4	2	0	0	0	0	0	6	2	0	7	21	3	0	70
d__Eukaryota	k__Fungi	p__unclassified_k__Fungi	c__unclassified_k__Fungi	o__unclassified_k__Fungi	f__unclassified_k__Fungi	g__unclassified_k__Fungi	s__unclassified_k__Fungi	OTU189	1	4	14	1	0	0	0	0	0	2	0	0	1	0	0	0	0	0	0	0	6	0	0	6	0	0	11	46
d__Eukaryota	k__Fungi	p__unclassified_k__Fungi	c__unclassified_k__Fungi	o__unclassified_k__Fungi	f__unclassified_k__Fungi	g__unclassified_k__Fungi	s__unclassified_k__Fungi	OTU1290	399	795	577	0	0	0	0	0	0	0	0	0	0	0	0	373	735	219	170	188	19	53	142	152	106	396	474	4798
d__Eukaryota	k__Fungi	p__Basidiomycota	c__Tremellomycetes	o__Tremellales	f__Bulleribasidiaceae	g__Vishniacozyma	s__unclassified_g__Vishniacozyma	OTU301	6	0	7	95	14	15	2	0	0	12	0	1	18	0	9	0	0	11	21	0	21	2	5	4	6	0	27	276
d__Eukaryota	k__Fungi	p__Ascomycota	c__Dothideomycetes	o__Pleosporales	f__unclassified_o__Pleosporales	g__unclassified_o__Pleosporales	s__unclassified_o__Pleosporales	OTU1025	0	0	0	0	0	0	0	0	0	0	0	0	0	0	0	10	0	0	0	4	0	0	0	0	0	10	0	24
d__Eukaryota	k__Fungi	p__Aphelidiomycota	c__Aphelidiomycetes	o__GS16	f__unclassified_o__GS16	g__unclassified_o__GS16	s__GS16_sp	OTU607	95	198	52	746	124	188	102	2637	761	934	630	6527	65	520	1446	13	71	83	693	1182	148	5383	697	528	675	349	1637	26484
d__Eukaryota	k__Fungi	p__Ascomycota	c__Eurotiomycetes	o__Eurotiales	f__Aspergillaceae	g__Phialosimplex	s__Phialosimplex_sp	OTU244	10	2	3	1	1	1	14	2	3	8	0	9	3	1	1	3	13	1	0	9	44	6	1	2	15	20	0	173
d__Eukaryota	k__Fungi	p__Ascomycota	c__Dothideomycetes	o__Pleosporales	f__unclassified_o__Pleosporales	g__unclassified_o__Pleosporales	s__unclassified_o__Pleosporales	OTU1144	0	82	0	0	0	0	0	0	0	0	0	0	0	0	0	5	47	0	0	20	0	0	0	0	31	1	42	228
d__Eukaryota	k__Fungi	p__Ascomycota	c__Eurotiomycetes	o__Chaetothyriales	f__Herpotrichiellaceae	g__Cladophialophora	s__unclassified_g__Cladophialophora	OTU915	2	5	0	0	0	0	0	0	0	0	0	0	0	0	0	0	0	1	2	0	0	0	0	0	4	0	0	14
d__Eukaryota	k__Fungi	p__Ascomycota	c__Sordariomycetes	o__Sordariales	f__Lasiosphaeriaceae	g__unclassified_f__Lasiosphaeriaceae	s__unclassified_f__Lasiosphaeriaceae	OTU832	0	8	0	0	0	0	16	2	0	0	27	0	0	0	6	0	0	0	39	0	0	1	84	0	1	0	10	194
d__Eukaryota	k__Fungi	p__Mortierellomycota	c__Mortierellomycetes	o__Mortierellales	f__Mortierellaceae	g__Mortierella	s__Mortierella_polycephala	OTU182	0	0	32	0	0	0	0	0	0	0	0	8	14	0	0	0	0	20	2	0	0	0	0	1	0	84	0	161
d__Eukaryota	k__Fungi	p__Basidiomycota	c__Tremellomycetes	o__Tremellales	f__Rhynchogastremataceae	g__Papiliotrema	s__Papiliotrema_flavescens	OTU26	0	0	20	0	0	0	0	3	0	0	0	0	0	0	0	0	0	0	0	16	0	1	9	11	0	0	0	60
d__Eukaryota	k__Fungi	p__Basidiomycota	c__Tremellomycetes	o__Tremellales	f__Trimorphomycetaceae	g__Saitozyma	s__Saitozyma_flava	OTU320	0	0	0	0	0	4	1	0	0	0	2	0	0	0	0	0	0	0	0	0	0	0	3	0	0	0	0	10
d__Eukaryota	k__Fungi	p__Mortierellomycota	c__Mortierellomycetes	o__Mortierellales	f__Mortierellaceae	g__Mortierella	s__unclassified_g__Mortierella	OTU1192	7	0	8	0	0	0	0	0	0	0	0	0	0	0	0	14	0	4	0	5	0	0	0	0	0	0	13	51
d__Eukaryota	k__Fungi	p__unclassified_k__Fungi	c__unclassified_k__Fungi	o__unclassified_k__Fungi	f__unclassified_k__Fungi	g__unclassified_k__Fungi	s__unclassified_k__Fungi	OTU143	0	0	0	0	3	0	2	1	3	12	1	0	0	1	2	0	0	0	0	0	0	0	0	0	0	0	0	25
d__Eukaryota	k__Fungi	p__unclassified_k__Fungi	c__unclassified_k__Fungi	o__unclassified_k__Fungi	f__unclassified_k__Fungi	g__unclassified_k__Fungi	s__unclassified_k__Fungi	OTU148	0	0	0	0	0	6	0	4	23	0	9	19	0	19	4	0	1	0	0	0	0	0	0	0	10	16	5	116
d__Eukaryota	k__Fungi	p__Ascomycota	c__Sordariomycetes	o__Glomerellales	f__Plectosphaerellaceae	g__Lectera	s__Lectera_sp	OTU512	0	0	4	0	0	0	0	0	0	0	0	0	0	0	0	0	0	0	0	2	0	0	0	2	0	0	0	8
d__Eukaryota	k__Fungi	p__unclassified_k__Fungi	c__unclassified_k__Fungi	o__unclassified_k__Fungi	f__unclassified_k__Fungi	g__unclassified_k__Fungi	s__unclassified_k__Fungi	OTU1310	0	0	0	0	0	0	0	0	0	0	0	0	0	0	0	0	0	1	0	6	2	0	4	0	0	0	0	13
d__Eukaryota	k__Fungi	p__unclassified_k__Fungi	c__unclassified_k__Fungi	o__unclassified_k__Fungi	f__unclassified_k__Fungi	g__unclassified_k__Fungi	s__unclassified_k__Fungi	OTU264	6	0	0	0	11	20	2	8	0	43	64	1125	12	3752	2677	0	4	1	0	7	0	9	24	4	36	146	7	7958
d__Eukaryota	k__Fungi	p__Ascomycota	c__Sordariomycetes	o__unclassified_c__Sordariomycetes	f__unclassified_c__Sordariomycetes	g__unclassified_c__Sordariomycetes	s__unclassified_c__Sordariomycetes	OTU1317	0	0	4	0	0	0	0	0	0	0	0	0	0	0	0	0	10	9	0	6	0	0	0	0	0	0	0	29
d__Eukaryota	k__Fungi	p__Ascomycota	c__Leotiomycetes	o__Helotiales	f__Hyaloscyphaceae	g__Cistella	s__Cistella_sp	OTU337	15	0	0	0	0	0	0	1	0	1	0	0	0	0	0	1	18	0	2	0	1	2	0	0	1	0	0	42
d__Eukaryota	k__Fungi	p__Basidiomycota	c__Tremellomycetes	o__Tremellales	f__Bulleribasidiaceae	g__Hannaella	s__Hannaella_zeae	OTU662	0	0	19	0	0	0	0	0	0	0	0	0	0	0	0	8	0	0	0	36	3	0	0	0	0	0	0	66
d__Eukaryota	k__Fungi	p__Ascomycota	c__Sordariomycetes	o__Hypocreales	f__Clavicipitaceae	g__Metarhizium	s__Metarhizium_marquandii	OTU842	4	0	8	0	0	0	2	0	0	0	0	0	0	0	0	0	0	0	0	0	3	0	4	0	0	0	1	22
d__Eukaryota	k__Fungi	p__Ascomycota	c__Leotiomycetes	o__Helotiales	f__Vibrisseaceae	g__Phialocephala	s__unclassified_g__Phialocephala	OTU1106	0	0	0	0	0	0	0	0	0	0	0	0	0	0	0	0	0	0	0	0	0	0	0	0	20	8	14	42
d__Eukaryota	k__Fungi	p__unclassified_k__Fungi	c__unclassified_k__Fungi	o__unclassified_k__Fungi	f__unclassified_k__Fungi	g__unclassified_k__Fungi	s__unclassified_k__Fungi	OTU214	0	4	0	0	0	0	1	0	0	0	3	0	1	6	0	0	0	0	0	9	0	0	3	0	0	0	0	27
d__Eukaryota	k__Fungi	p__Ascomycota	c__Sordariomycetes	o__Sordariales	f__unclassified_o__Sordariales	g__unclassified_o__Sordariales	s__unclassified_o__Sordariales	OTU811	7	35	0	4	4	2	19	2	3	19	7	1	19	24	3	0	3	8	6	27	93	8	50	19	5	33	0	401
d__Eukaryota	k__Fungi	p__Mortierellomycota	c__Mortierellomycetes	o__Mortierellales	f__Mortierellaceae	g__Mortierella	s__Mortierella_elongata	OTU158	198	318	327	641	26	91	473	108	185	75	144	284	211	132	95	198	332	229	891	176	211	162	437	229	253	334	84	6844
d__Eukaryota	k__Fungi	p__Ascomycota	c__Sordariomycetes	o__Sordariales	f__Lasiosphaeriaceae	g__Schizothecium	s__Schizothecium_glutinans	OTU43	1	0	1	0	0	3	12	69	16	4	16	5	7	9	7	15	8	5	72	9	16	35	23	11	43	8	0	395
d__Eukaryota	k__Fungi	p__Glomeromycota	c__Paraglomeromycetes	o__Paraglomerales	f__unclassified_o__Paraglomerales	g__unclassified_o__Paraglomerales	s__unclassified_o__Paraglomerales	OTU952	0	3	0	0	0	0	0	0	0	0	0	0	0	0	0	1	0	0	0	0	0	0	0	0	3	6	0	13
d__Eukaryota	k__Fungi	p__unclassified_k__Fungi	c__unclassified_k__Fungi	o__unclassified_k__Fungi	f__unclassified_k__Fungi	g__unclassified_k__Fungi	s__unclassified_k__Fungi	OTU283	0	0	0	11	2	0	0	1	0	0	23	0	0	0	0	0	0	0	1	2	0	0	0	0	0	0	0	40
d__Eukaryota	k__Fungi	p__Basidiomycota	c__Agaricomycetes	o__Thelephorales	f__Thelephoraceae	g__Tomentella	s__Tomentella_ellisii	OTU543	0	17	18	0	0	0	0	0	0	0	0	0	0	0	0	12	10	13	2	0	1	0	8	2	4	43	26	156
d__Eukaryota	k__Fungi	p__Ascomycota	c__Dothideomycetes	o__Pleosporales	f__Didymellaceae	g__unclassified_f__Didymellaceae	s__unclassified_f__Didymellaceae	OTU559	0	0	4	0	0	1	0	0	0	0	0	1	0	2	0	0	0	0	0	1	4	0	15	6	0	0	0	34
d__Eukaryota	k__Fungi	p__unclassified_k__Fungi	c__unclassified_k__Fungi	o__unclassified_k__Fungi	f__unclassified_k__Fungi	g__unclassified_k__Fungi	s__unclassified_k__Fungi	OTU53	0	0	0	1	0	1	1	9	9	16	4	1	0	19	4	0	0	0	0	0	1	1	0	0	2	0	0	69
d__Eukaryota	k__Fungi	p__unclassified_k__Fungi	c__unclassified_k__Fungi	o__unclassified_k__Fungi	f__unclassified_k__Fungi	g__unclassified_k__Fungi	s__unclassified_k__Fungi	OTU56	0	0	0	0	74	0	0	0	27	0	0	12	0	0	1	0	0	6	0	0	0	0	1	0	0	13	0	134
d__Eukaryota	k__Fungi	p__unclassified_k__Fungi	c__unclassified_k__Fungi	o__unclassified_k__Fungi	f__unclassified_k__Fungi	g__unclassified_k__Fungi	s__unclassified_k__Fungi	OTU284	0	0	0	38	0	0	0	0	0	0	0	0	0	0	0	0	0	8	0	0	0	4	0	0	0	0	0	50
d__Eukaryota	k__Fungi	p__Ascomycota	c__Leotiomycetes	o__Helotiales	f__Leotiaceae	g__Neobulgaria	s__Neobulgaria_sp	OTU436	0	0	0	0	0	0	0	0	0	0	0	0	0	0	0	15	18	1	1	1	0	0	0	4	4	0	0	44
d__Eukaryota	k__Fungi	p__unclassified_k__Fungi	c__unclassified_k__Fungi	o__unclassified_k__Fungi	f__unclassified_k__Fungi	g__unclassified_k__Fungi	s__unclassified_k__Fungi	OTU772	11	44	28	2	40	119	0	3	538	9	0	212	17	10	2186	0	0	2	23	0	116	2118	18	33	24	1	8	5562
d__Eukaryota	k__Fungi	p__Ascomycota	c__Eurotiomycetes	o__Eurotiales	f__Trichocomaceae	g__Talaromyces	s__unclassified_g__Talaromyces	OTU731	1	0	0	0	3	0	0	0	0	1	0	0	0	0	2	0	12	1	2	0	8	0	0	2	5	0	0	37
d__Eukaryota	k__Fungi	p__unclassified_k__Fungi	c__unclassified_k__Fungi	o__unclassified_k__Fungi	f__unclassified_k__Fungi	g__unclassified_k__Fungi	s__unclassified_k__Fungi	OTU858	6	8	8	0	0	0	0	0	0	0	0	0	0	0	0	5	0	1	4	2	0	0	0	2	0	3	10	49
d__Eukaryota	k__Fungi	p__unclassified_k__Fungi	c__unclassified_k__Fungi	o__unclassified_k__Fungi	f__unclassified_k__Fungi	g__unclassified_k__Fungi	s__unclassified_k__Fungi	OTU774	0	0	0	0	0	0	3	0	0	4	0	2	1	0	10	0	0	7	27	0	2	46	0	0	0	0	7	109
d__Eukaryota	k__Fungi	p__unclassified_k__Fungi	c__unclassified_k__Fungi	o__unclassified_k__Fungi	f__unclassified_k__Fungi	g__unclassified_k__Fungi	s__unclassified_k__Fungi	OTU673	2	0	0	0	0	0	0	0	0	1	0	0	0	0	0	24	7	5	1	3	1	0	0	0	0	1	0	45
d__Eukaryota	k__Fungi	p__Basidiomycota	c__Tremellomycetes	o__Trichosporonales	f__Trichosporonaceae	g__Apiotrichum	s__unclassified_g__Apiotrichum	OTU415	0	22	2	0	0	2	0	0	0	0	4	0	0	0	5	0	10	0	0	0	0	0	0	0	2	0	6	53
d__Eukaryota	k__Fungi	p__Ascomycota	c__Sordariomycetes	o__Microascales	f__Microascaceae	g__Kernia	s__unclassified_g__Kernia	OTU1142	3	0	9	0	3	1	0	2	1	5	2	2	1	3	0	3	6	1	1	4	3	0	1	5	18	6	0	80
d__Eukaryota	k__Fungi	p__Basidiomycota	c__Tremellomycetes	o__Filobasidiales	f__Piskurozymaceae	g__Solicoccozyma	s__Solicoccozyma_terrea	OTU1066	0	0	0	0	0	0	0	0	0	0	0	0	0	0	0	0	0	2	2	6	0	0	0	0	0	14	0	24
d__Eukaryota	k__Fungi	p__Ascomycota	c__Leotiomycetes	o__Helotiales	f__Hyaloscyphaceae	g__Pezizella	s__Pezizella_sp	OTU1295	10	14	28	0	0	0	0	0	0	0	0	0	0	0	0	18	116	4	10	38	1	0	0	0	18	8	8	273
d__Eukaryota	k__Fungi	p__Ascomycota	c__Saccharomycetes	o__Saccharomycetales	f__unclassified_o__Saccharomycetales	g__unclassified_o__Saccharomycetales	s__unclassified_o__Saccharomycetales	OTU305	0	0	0	0	1	112	2	1	10	0	0	5	0	0	1	1	16	0	0	0	1	1	0	0	0	0	0	151
d__Eukaryota	k__Fungi	p__Basidiomycota	c__Agaricomycetes	o__Sebacinales	f__Sebacinaceae	g__Sebacina	s__Sebacina_sp	OTU825	239	897	395	0	0	0	0	0	0	0	0	0	0	0	0	115	758	173	69	277	19	41	353	88	128	291	464	4307
d__Eukaryota	k__Fungi	p__Mortierellomycota	c__Mortierellomycetes	o__Mortierellales	f__Mortierellaceae	g__Mortierella	s__Mortierella_indohii	OTU633	827	353	1627	2777	62	473	442	16	144	1876	47	106	2724	40	69	47	31	52	399	314	200	103	242	646	54	108	562	14341
d__Eukaryota	k__Fungi	p__Ascomycota	c__Sordariomycetes	o__Sordariales	f__Chaetomiaceae	g__unclassified_f__Chaetomiaceae	s__unclassified_f__Chaetomiaceae	OTU726	0	0	1	0	1	0	0	0	0	0	0	0	2	0	0	0	0	1	0	0	120	0	0	6	2	0	0	133
d__Eukaryota	k__Fungi	p__unclassified_k__Fungi	c__unclassified_k__Fungi	o__unclassified_k__Fungi	f__unclassified_k__Fungi	g__unclassified_k__Fungi	s__unclassified_k__Fungi	OTU1012	0	0	0	0	0	0	0	0	0	0	0	0	0	0	0	0	0	3	0	0	1	0	0	5	0	22	11	42
d__Eukaryota	k__Fungi	p__Ascomycota	c__Dothideomycetes	o__Venturiales	f__Venturiaceae	g__Venturia	s__unclassified_g__Venturia	OTU639	3	15	7	0	0	0	0	0	0	0	0	0	0	0	0	6	27	0	1	8	0	0	2	1	11	1	0	82
d__Eukaryota	k__Fungi	p__Aphelidiomycota	c__Aphelidiomycetes	o__GS16	f__unclassified_o__GS16	g__unclassified_o__GS16	s__GS16_sp	OTU721	25	0	4	7	0	6	7	0	11	2	22	1	3	14	21	0	5	0	0	14	6	5	5	16	0	6	0	180
d__Eukaryota	k__Fungi	p__Ascomycota	c__Eurotiomycetes	o__Eurotiales	f__Aspergillaceae	g__Aspergillus	s__Aspergillus_fumigatus	OTU763	2	4	0	0	4	0	0	0	0	0	1	3	2	7	2	0	1	0	3	4	3	7	0	2	11	10	4	70
d__Eukaryota	k__Fungi	p__Ascomycota	c__Sordariomycetes	o__Glomerellales	f__Plectosphaerellaceae	g__Verticillium	s__Verticillium_klebahnii	OTU759	65	20	22	5	0	5	4	0	1	8	8	8	4	25	7	1	25	3	0	10	10	3	16	159	0	60	80	549
d__Eukaryota	k__Fungi	p__Ascomycota	c__Sordariomycetes	o__Sordariales	f__Lasiosphaeriaceae	g__Schizothecium	s__unclassified_g__Schizothecium	OTU1165	0	1	0	0	0	0	0	0	0	0	0	0	0	0	0	8	6	0	0	3	0	0	0	0	0	0	6	24
d__Eukaryota	k__Fungi	p__Ascomycota	c__Sordariomycetes	o__Hypocreales	f__Nectriaceae	g__Neonectria	s__Neonectria_candida	OTU566	2	0	0	0	0	0	0	0	0	0	0	2	1	0	2	0	20	0	9	15	4	0	0	0	0	0	0	55
d__Eukaryota	k__Fungi	p__Rozellomycota	c__unclassified_p__Rozellomycota	o__unclassified_p__Rozellomycota	f__unclassified_p__Rozellomycota	g__unclassified_p__Rozellomycota	s__Rozellomycota_sp	OTU751	0	0	0	0	8	0	2	0	1	0	0	0	10	0	11	0	0	5	0	0	5	27	0	13	3	0	24	109
d__Eukaryota	k__Fungi	p__Chytridiomycota	c__unclassified_p__Chytridiomycota	o__unclassified_p__Chytridiomycota	f__unclassified_p__Chytridiomycota	g__unclassified_p__Chytridiomycota	s__unclassified_p__Chytridiomycota	OTU267	0	0	0	0	0	6	1	0	0	0	0	0	0	0	11	0	0	0	0	0	0	0	0	0	4	0	1	23
d__Eukaryota	k__Fungi	p__Ascomycota	c__Dothideomycetes	o__Pleosporales	f__Sporormiaceae	g__Preussia	s__Preussia_globosa	OTU1048	0	2	0	0	0	0	0	0	2	4	2	1	0	0	2	0	6	0	0	0	0	0	4	0	1	4	0	28
d__Eukaryota	k__Fungi	p__Basidiomycota	c__Agaricomycetes	o__Agaricales	f__Strophariaceae	g__Deconica	s__unclassified_g__Deconica	OTU821	3	4	4	0	0	0	0	0	0	0	0	0	0	0	0	4	9	4	4	4	0	0	2	1	0	3	3	45
d__Eukaryota	k__Fungi	p__Aphelidiomycota	c__Aphelidiomycetes	o__GS16	f__unclassified_o__GS16	g__unclassified_o__GS16	s__GS16_sp	OTU40	0	0	14	0	0	0	1	7	0	0	0	0	0	0	0	0	0	0	2	0	0	9	0	0	0	0	0	33
d__Eukaryota	k__Fungi	p__Ascomycota	c__Sordariomycetes	o__Microascales	f__Microascaceae	g__Pseudallescheria	s__unclassified_g__Pseudallescheria	OTU626	40	95	45	0	0	0	18	3	2	7	7	1	5	32	7	28	167	22	19	44	11	1	10	37	44	54	70	769
d__Eukaryota	k__Fungi	p__Ascomycota	c__Saccharomycetes	o__Saccharomycetales	f__Saccharomycetales_fam_Incertae_sedis	g__Candida	s__unclassified_g__Candida	OTU374	12	0	1	0	0	1	1	0	0	0	0	0	0	0	0	0	0	0	0	2	0	0	0	5	1	0	0	23
d__Eukaryota	k__Fungi	p__unclassified_k__Fungi	c__unclassified_k__Fungi	o__unclassified_k__Fungi	f__unclassified_k__Fungi	g__unclassified_k__Fungi	s__unclassified_k__Fungi	OTU452	0	17	0	0	0	0	0	0	0	0	0	0	0	0	0	4	0	0	0	0	0	0	17	0	0	0	13	51
d__Eukaryota	k__Fungi	p__Rozellomycota	c__unclassified_p__Rozellomycota	o__unclassified_p__Rozellomycota	f__unclassified_p__Rozellomycota	g__unclassified_p__Rozellomycota	s__Rozellomycota_sp	OTU615	0	0	0	0	0	0	1	7	24	1	11	2	0	1	29	0	0	1	237	0	18	0	1	1	1	12	0	347
d__Eukaryota	k__Fungi	p__unclassified_k__Fungi	c__unclassified_k__Fungi	o__unclassified_k__Fungi	f__unclassified_k__Fungi	g__unclassified_k__Fungi	s__unclassified_k__Fungi	OTU109	11	57	0	3	7	4	4	4	10	0	4	3	1	9	0	1	1	15	6	0	3	1	19	3	5	2	7	180
d__Eukaryota	k__Fungi	p__Ascomycota	c__Sordariomycetes	o__Microascales	f__Microascaceae	g__Kernia	s__unclassified_g__Kernia	OTU969	0	0	7	0	3	1	0	1	1	2	3	1	2	2	1	0	0	1	1	1	1	2	0	0	8	0	0	38
d__Eukaryota	k__Fungi	p__Ascomycota	c__Sordariomycetes	o__Sordariales	f__Chaetomiaceae	g__Trichocladium	s__Trichocladium_asperum	OTU681	1	0	2	0	4	1	6	0	5	3	0	0	0	1	0	1	8	4	4	5	133	5	0	7	13	5	0	208
d__Eukaryota	k__Fungi	p__Basidiomycota	c__Cystobasidiomycetes	o__Cystobasidiomycetes_ord_Incertae_sedis	f__Symmetrosporaceae	g__Symmetrospora	s__Symmetrospora_symmetrica	OTU29	0	0	4	0	0	0	1	1	0	7	3	0	2	0	0	0	6	3	0	0	0	0	0	1	0	0	0	28
d__Eukaryota	k__Fungi	p__Ascomycota	c__unclassified_p__Ascomycota	o__unclassified_p__Ascomycota	f__unclassified_p__Ascomycota	g__unclassified_p__Ascomycota	s__unclassified_p__Ascomycota	OTU1102	0	0	0	0	0	0	0	0	0	0	0	0	0	0	0	0	1	0	0	0	0	0	0	2	0	3	3	9
d__Eukaryota	k__Fungi	p__Ascomycota	c__Dothideomycetes	o__Pleosporales	f__Pleosporales_fam_Incertae_sedis	g__Dokmaia	s__Dokmaia_sp	OTU315	0	0	13	0	4	3	0	4	0	0	0	0	0	0	0	0	0	4	3	0	3	5	17	0	0	0	16	72
d__Eukaryota	k__Fungi	p__unclassified_k__Fungi	c__unclassified_k__Fungi	o__unclassified_k__Fungi	f__unclassified_k__Fungi	g__unclassified_k__Fungi	s__unclassified_k__Fungi	OTU698	0	0	0	0	0	0	0	0	0	0	0	0	4	0	0	0	0	5	0	0	11	0	0	0	0	0	0	20
d__Eukaryota	k__Fungi	p__unclassified_k__Fungi	c__unclassified_k__Fungi	o__unclassified_k__Fungi	f__unclassified_k__Fungi	g__unclassified_k__Fungi	s__unclassified_k__Fungi	OTU515	0	1	5	0	0	0	0	0	1	0	0	1	0	0	3	2	0	0	0	0	1	0	0	0	1	0	1	16
d__Eukaryota	k__Fungi	p__Basidiomycota	c__Agaricomycetes	o__Agaricales	f__Entolomataceae	g__Entoloma	s__unclassified_g__Entoloma	OTU1181	0	0	0	0	0	0	0	0	0	0	0	0	0	0	0	10	8	0	0	0	0	0	0	0	1	1	0	20
d__Eukaryota	k__Fungi	p__Ascomycota	c__Eurotiomycetes	o__Eurotiales	f__Trichocomaceae	g__Rasamsonia	s__Rasamsonia_emersonii	OTU956	0	2	0	0	0	0	0	0	0	1	1	0	0	0	0	0	5	0	0	0	3	0	0	0	5	0	0	17
d__Eukaryota	k__Fungi	p__Ascomycota	c__Sordariomycetes	o__Sordariales	f__Sordariaceae	g__unclassified_f__Sordariaceae	s__unclassified_f__Sordariaceae	OTU569	1	0	2	0	0	0	0	0	8	1	0	0	0	8	0	0	0	0	1	0	0	1	1	3	5	0	0	31
d__Eukaryota	k__Fungi	p__unclassified_k__Fungi	c__unclassified_k__Fungi	o__unclassified_k__Fungi	f__unclassified_k__Fungi	g__unclassified_k__Fungi	s__unclassified_k__Fungi	OTU61	2	0	0	0	0	0	2	0	2	0	2	0	0	0	0	0	0	0	0	0	0	0	3	0	0	0	4	15
d__Eukaryota	k__Fungi	p__Ascomycota	c__Eurotiomycetes	o__Chaetothyriales	f__Herpotrichiellaceae	g__Exophiala	s__unclassified_g__Exophiala	OTU511	1	0	7	0	0	0	0	0	0	0	0	0	0	0	0	0	7	0	4	0	0	0	0	0	0	0	0	19
d__Eukaryota	k__Fungi	p__Chytridiomycota	c__Rhizophydiomycetes	o__Rhizophydiales	f__Rhizophydiaceae	g__Rhizophydium	s__Rhizophydium_sp	OTU1146	1	0	1	0	0	0	0	0	0	0	0	0	0	0	0	1	5	1	2	0	0	0	2	4	0	0	0	17
d__Eukaryota	k__Fungi	p__Ascomycota	c__Sordariomycetes	o__Hypocreales	f__Hypocreales_fam_Incertae_sedis	g__Acremonium	s__Acremonium_curvulum	OTU362	5	0	0	0	0	0	0	0	0	0	0	0	0	0	0	9	0	0	0	0	0	0	0	11	0	0	0	25
d__Eukaryota	k__Fungi	p__Mortierellomycota	c__Mortierellomycetes	o__Mortierellales	f__Mortierellaceae	g__Mortierella	s__unclassified_g__Mortierella	OTU1058	0	0	3	0	0	0	0	0	0	0	0	0	0	0	0	0	9	0	3	0	0	0	0	2	0	16	0	33
d__Eukaryota	k__Fungi	p__unclassified_k__Fungi	c__unclassified_k__Fungi	o__unclassified_k__Fungi	f__unclassified_k__Fungi	g__unclassified_k__Fungi	s__unclassified_k__Fungi	OTU527	0	0	47	0	0	0	0	0	0	0	0	0	0	0	0	27	17	0	6	13	1	0	0	20	0	0	49	180
d__Eukaryota	k__Fungi	p__Ascomycota	c__Eurotiomycetes	o__Eurotiales	f__Aspergillaceae	g__Monascus	s__Monascus_pilosus	OTU1069	9	24	13	0	0	0	0	0	0	0	0	0	0	0	0	29	120	5	4	19	0	0	1	4	18	10	0	256
d__Eukaryota	k__Fungi	p__Rozellomycota	c__unclassified_p__Rozellomycota	o__unclassified_p__Rozellomycota	f__unclassified_p__Rozellomycota	g__unclassified_p__Rozellomycota	s__Rozellomycota_sp	OTU249	6	0	0	0	0	0	0	0	0	0	0	1	0	0	499	0	0	0	0	0	7	0	0	0	3	0	10	526
d__Eukaryota	k__Fungi	p__Chytridiomycota	c__unclassified_p__Chytridiomycota	o__unclassified_p__Chytridiomycota	f__unclassified_p__Chytridiomycota	g__unclassified_p__Chytridiomycota	s__unclassified_p__Chytridiomycota	OTU154	0	0	0	0	0	50	0	0	1	0	0	29	0	2	0	0	0	0	4	0	0	0	0	0	0	0	0	86
d__Eukaryota	k__Fungi	p__Ascomycota	c__Leotiomycetes	o__Helotiales	f__Hyaloscyphaceae	g__Lachnum	s__Lachnum_sp	OTU1220	0	0	0	0	0	0	0	0	0	0	0	0	0	0	0	0	15	0	0	0	0	1	0	0	7	0	8	31
d__Eukaryota	k__Fungi	p__Basidiomycota	c__Tremellomycetes	o__Tremellales	f__Bulleribasidiaceae	g__Vishniacozyma	s__Vishniacozyma_heimaeyensis	OTU659	15	0	0	16	0	1	3	7	7	2	12	6	1	20	2	0	23	15	29	52	30	15	16	5	2	0	31	310
d__Eukaryota	k__Fungi	p__Ascomycota	c__Dothideomycetes	o__Pleosporales	f__Sporormiaceae	g__Westerdykella	s__Westerdykella_sp	OTU748	0	0	0	0	1	0	0	6	0	0	1	6	0	4	2	0	0	0	0	0	5	1	4	0	5	3	21	59
d__Eukaryota	k__Fungi	p__Basidiomycota	c__Agaricomycetes	o__Russulales	f__Lachnocladiaceae	g__Vararia	s__Vararia_abortiphysa	OTU1257	0	0	0	0	0	0	0	0	0	0	0	0	0	0	0	7	13	3	1	0	0	0	0	3	2	0	5	34
d__Eukaryota	k__Fungi	p__unclassified_k__Fungi	c__unclassified_k__Fungi	o__unclassified_k__Fungi	f__unclassified_k__Fungi	g__unclassified_k__Fungi	s__unclassified_k__Fungi	OTU636	25	73	18	0	0	0	0	0	0	0	0	0	0	0	0	25	0	17	12	25	5	0	20	1	29	3	34	287
d__Eukaryota	k__Fungi	p__Ascomycota	c__Sordariomycetes	o__unclassified_c__Sordariomycetes	f__unclassified_c__Sordariomycetes	g__unclassified_c__Sordariomycetes	s__unclassified_c__Sordariomycetes	OTU813	0	0	0	0	0	2	6	0	4	18	5	10	51	0	0	0	0	0	95	29	0	86	320	0	9	0	3	638
d__Eukaryota	k__Fungi	p__unclassified_k__Fungi	c__unclassified_k__Fungi	o__unclassified_k__Fungi	f__unclassified_k__Fungi	g__unclassified_k__Fungi	s__unclassified_k__Fungi	OTU632	2	56	3	0	0	0	0	0	0	0	0	0	0	0	0	5	7	9	2	2	0	0	2	5	0	17	0	110
d__Eukaryota	k__Fungi	p__unclassified_k__Fungi	c__unclassified_k__Fungi	o__unclassified_k__Fungi	f__unclassified_k__Fungi	g__unclassified_k__Fungi	s__unclassified_k__Fungi	OTU322	4	5	2	4	3	3	0	0	0	3	16	3	1	5	1	1	1	0	0	0	2	2	2	2	4	0	2	66
d__Eukaryota	k__Fungi	p__Ascomycota	c__Saccharomycetes	o__Saccharomycetales	f__Trichomonascaceae	g__Blastobotrys	s__Blastobotrys_adeninivorans	OTU891	2	0	12	0	1	1	1	0	2	0	0	0	5	0	9	0	0	2	3	0	2	0	0	6	26	0	2	74
d__Eukaryota	k__Fungi	p__Basidiomycota	c__Tremellomycetes	o__Filobasidiales	f__Filobasidiaceae	g__Filobasidium	s__Filobasidium_sp	OTU468	56	4	15	0	13	7	3	0	3	1	4	4	12	3	15	7	0	1	2	2	1	0	1	14	76	3	19	266
d__Eukaryota	k__Fungi	p__Mortierellomycota	c__Mortierellomycetes	o__Mortierellales	f__Mortierellaceae	g__Mortierella	s__Mortierella_gamsii	OTU588	48	44	527	3	95	30	42	6	76	117	12	26	22	8	3	379	260	136	581	300	57	5	5	223	104	137	4	3250
d__Eukaryota	k__Fungi	p__unclassified_k__Fungi	c__unclassified_k__Fungi	o__unclassified_k__Fungi	f__unclassified_k__Fungi	g__unclassified_k__Fungi	s__unclassified_k__Fungi	OTU865	7	19	0	0	0	0	0	0	0	0	0	0	0	0	0	0	38	20	6	33	0	0	12	17	4	15	32	203
d__Eukaryota	k__Fungi	p__Ascomycota	c__Sordariomycetes	o__unclassified_c__Sordariomycetes	f__unclassified_c__Sordariomycetes	g__unclassified_c__Sordariomycetes	s__unclassified_c__Sordariomycetes	OTU799	9	4	4	13	1	5	2	7	4	6	14	6	0	1	2	0	0	10	1	0	19	2	27	0	11	14	27	189
d__Eukaryota	k__Fungi	p__unclassified_k__Fungi	c__unclassified_k__Fungi	o__unclassified_k__Fungi	f__unclassified_k__Fungi	g__unclassified_k__Fungi	s__unclassified_k__Fungi	OTU803	0	0	20	0	0	0	0	0	0	0	0	0	0	0	0	0	0	0	0	6	0	0	22	0	0	24	0	72
d__Eukaryota	k__Fungi	p__Basidiomycota	c__Tremellomycetes	o__Tremellales	f__Trimorphomycetaceae	g__Saitozyma	s__Saitozyma_sp	OTU1264	94	179	30	0	0	0	0	0	0	0	0	0	1	0	0	37	234	9	14	24	3	14	11	20	6	31	139	846
d__Eukaryota	k__Fungi	p__unclassified_k__Fungi	c__unclassified_k__Fungi	o__unclassified_k__Fungi	f__unclassified_k__Fungi	g__unclassified_k__Fungi	s__unclassified_k__Fungi	OTU1055	0	2	0	1	1	0	1	17	5	2	5	3	0	57	5	0	15	0	0	9	0	2	52	6	14	8	20	225
d__Eukaryota	k__Fungi	p__unclassified_k__Fungi	c__unclassified_k__Fungi	o__unclassified_k__Fungi	f__unclassified_k__Fungi	g__unclassified_k__Fungi	s__unclassified_k__Fungi	OTU1117	1	0	0	0	0	0	0	0	0	0	0	0	0	0	7	0	0	0	0	0	0	32	0	0	0	0	35	75
d__Eukaryota	k__Fungi	p__Basidiomycota	c__Tremellomycetes	o__Trichosporonales	f__Trichosporonaceae	g__Vanrija	s__Vanrija_fragicola	OTU669	38	1	33	19	0	21	6	4	2	6	6	0	2	14	7	77	95	39	25	17	5	35	8	3	12	15	56	546
d__Eukaryota	k__Fungi	p__Ascomycota	c__Dothideomycetes	o__Pleosporales	f__Pleosporaceae	g__Alternaria	s__unclassified_g__Alternaria	OTU671	301	37	101	2	3	26	8	7	415	16	5	27	40	10	4	13	47	69	16	31	61	2	24	59	11	11	33	1379
d__Eukaryota	k__Fungi	p__unclassified_k__Fungi	c__unclassified_k__Fungi	o__unclassified_k__Fungi	f__unclassified_k__Fungi	g__unclassified_k__Fungi	s__unclassified_k__Fungi	OTU873	0	0	0	30	35	4	12	240	0	2	14	2	14	0	0	0	1	1	0	3	10	3	17	22	0	24	0	434
d__Eukaryota	k__Fungi	p__unclassified_k__Fungi	c__unclassified_k__Fungi	o__unclassified_k__Fungi	f__unclassified_k__Fungi	g__unclassified_k__Fungi	s__unclassified_k__Fungi	OTU979	0	0	28	0	0	0	0	0	0	0	0	0	0	0	9	0	0	0	0	0	0	0	0	0	20	18	0	75
d__Eukaryota	k__Fungi	p__Basidiomycota	c__Tremellomycetes	o__Trichosporonales	f__Trichosporonaceae	g__Apiotrichum	s__Apiotrichum_laibachii	OTU1259	0	0	0	0	0	0	0	0	0	0	1	0	0	0	0	0	18	1	1	0	0	1	0	2	2	4	8	38
d__Eukaryota	k__Fungi	p__Basidiomycota	c__Agaricomycetes	o__Thelephorales	f__Thelephoraceae	g__unclassified_f__Thelephoraceae	s__Thelephoraceae_sp	OTU430	1	36	3	0	1	0	0	0	1	1	2	0	0	0	1	0	18	13	3	1	0	4	0	0	1	0	0	86
d__Eukaryota	k__Fungi	p__Rozellomycota	c__unclassified_p__Rozellomycota	o__unclassified_p__Rozellomycota	f__unclassified_p__Rozellomycota	g__unclassified_p__Rozellomycota	s__Rozellomycota_sp	OTU240	5	0	0	4	0	1	0	0	3	0	0	180	2	0	585	0	0	0	5	0	10	1	0	0	3	0	0	799
d__Eukaryota	k__Fungi	p__unclassified_k__Fungi	c__unclassified_k__Fungi	o__unclassified_k__Fungi	f__unclassified_k__Fungi	g__unclassified_k__Fungi	s__unclassified_k__Fungi	OTU973	0	3	4	1	0	0	2	0	0	7	0	1	15	0	5	3	0	12	1	4	2	1	2	0	590	4	150	807
d__Eukaryota	k__Fungi	p__unclassified_k__Fungi	c__unclassified_k__Fungi	o__unclassified_k__Fungi	f__unclassified_k__Fungi	g__unclassified_k__Fungi	s__unclassified_k__Fungi	OTU1189	0	0	0	0	0	1	3	0	3	1	0	0	0	0	0	3	0	0	9	0	0	0	4	0	4	0	0	28
d__Eukaryota	k__Fungi	p__Ascomycota	c__Sordariomycetes	o__Hypocreales	f__Nectriaceae	g__Thelonectria	s__Thelonectria_rubrococca	OTU647	0	5	0	0	0	0	0	0	0	0	0	0	0	0	0	10	0	0	0	10	0	0	0	0	0	5	1	31
d__Eukaryota	k__Fungi	p__unclassified_k__Fungi	c__unclassified_k__Fungi	o__unclassified_k__Fungi	f__unclassified_k__Fungi	g__unclassified_k__Fungi	s__unclassified_k__Fungi	OTU1024	0	0	0	3	25	0	0	14	4	0	360	44	2	156	53	0	0	0	0	0	2	481	1	0	37	71	0	1253
d__Eukaryota	k__Fungi	p__Aphelidiomycota	c__Aphelidiomycetes	o__GS16	f__unclassified_o__GS16	g__unclassified_o__GS16	s__GS16_sp	OTU160	0	5	5	0	0	0	0	0	1	0	0	20	3	0	0	0	9	0	0	4	151	0	44	0	0	0	0	242
d__Eukaryota	k__Fungi	p__Ascomycota	c__Sordariomycetes	o__Sordariales	f__Lasiosphaeriaceae	g__unclassified_f__Lasiosphaeriaceae	s__unclassified_f__Lasiosphaeriaceae	OTU343	1	0	3	1	0	1	2	0	5	0	0	0	1	2	0	0	0	1	1	0	4	0	0	1	4	0	0	27
d__Eukaryota	k__Fungi	p__Ascomycota	c__Leotiomycetes	o__Helotiales	f__Helotiales_fam_Incertae_sedis	g__Acephala	s__Acephala_sp	OTU554	0	0	3	0	0	0	0	0	0	0	0	0	0	0	0	3	0	3	0	0	0	0	0	0	0	0	0	9
d__Eukaryota	k__Fungi	p__Mortierellomycota	c__Mortierellomycetes	o__Mortierellales	f__Mortierellaceae	g__Mortierella	s__Mortierella_sp	OTU807	0	5	0	0	0	0	0	0	0	9	20	0	0	0	0	0	0	0	0	0	0	1	1	40	0	0	0	76
d__Eukaryota	k__Fungi	p__Basidiomycota	c__Tremellomycetes	o__Cystofilobasidiales	f__Mrakiaceae	g__Tausonia	s__Tausonia_pullulans	OTU460	210	534	99	4	10	13	12	11	8	10	29	4	52	32	2	34	210	26	35	40	31	6	13	96	22	39	75	1657
d__Eukaryota	k__Fungi	p__Basidiomycota	c__Wallemiomycetes	o__Wallemiales	f__Wallemiaceae	g__Wallemia	s__Wallemia_sp	OTU1176	0	0	0	0	0	0	0	0	0	0	0	0	0	0	0	21	0	0	10	0	8	10	5	6	0	0	11	71
d__Eukaryota	k__Fungi	p__unclassified_k__Fungi	c__unclassified_k__Fungi	o__unclassified_k__Fungi	f__unclassified_k__Fungi	g__unclassified_k__Fungi	s__unclassified_k__Fungi	OTU1336	0	0	0	0	0	0	5	0	0	6	0	0	4	0	0	0	0	1	0	0	0	0	0	0	0	0	0	16
d__Eukaryota	k__Fungi	p__Basidiomycota	c__Agaricomycetes	o__Thelephorales	f__Thelephoraceae	g__Tomentella	s__Tomentella_coerulea	OTU603	0	0	22	0	0	0	0	0	0	0	0	0	0	0	0	3	0	0	3	3	0	1	0	0	0	5	0	37
d__Eukaryota	k__Fungi	p__unclassified_k__Fungi	c__unclassified_k__Fungi	o__unclassified_k__Fungi	f__unclassified_k__Fungi	g__unclassified_k__Fungi	s__unclassified_k__Fungi	OTU414	36	32	0	0	0	0	0	0	0	0	0	0	0	0	0	19	0	0	4	0	0	0	0	1	0	0	111	203
d__Eukaryota	k__Fungi	p__Ascomycota	c__Sordariomycetes	o__Sordariales	f__Lasiosphaeriaceae	g__Schizothecium	s__unclassified_g__Schizothecium	OTU1155	0	0	0	0	0	0	0	0	0	0	0	0	0	0	0	7	0	0	0	3	1	0	2	5	0	0	0	18
d__Eukaryota	k__Fungi	p__Ascomycota	c__Sordariomycetes	o__Microascales	f__Microascaceae	g__Acaulium	s__Acaulium_acremonium	OTU155	2	0	5	0	4	2	2	5	3	0	6	5	4	2	2	3	8	2	3	5	10	7	2	4	31	10	0	127
d__Eukaryota	k__Fungi	p__Basidiomycota	c__Cystobasidiomycetes	o__Erythrobasidiales	f__Erythrobasidiales_fam_Incertae_sedis	g__Sakaguchia	s__Sakaguchia_sp	OTU691	5	0	2	0	0	3	0	0	7	0	0	0	0	0	1	0	10	38	0	0	28	1	0	2	0	0	1	98
d__Eukaryota	k__Fungi	p__Ascomycota	c__Sordariomycetes	o__Sordariales	f__Lasiosphaeriaceae	g__Schizothecium	s__unclassified_g__Schizothecium	OTU408	0	58	4	0	0	0	0	0	0	0	0	0	0	0	0	0	0	0	3	0	0	0	0	1	0	0	34	100
d__Eukaryota	k__Fungi	p__Aphelidiomycota	c__Aphelidiomycetes	o__GS16	f__unclassified_o__GS16	g__unclassified_o__GS16	s__GS16_sp	OTU294	0	0	0	0	11	0	0	0	0	0	0	1	0	0	17	0	0	0	0	0	0	5	0	0	1	0	0	35
d__Eukaryota	k__Fungi	p__Basidiomycota	c__Agaricomycetes	o__unclassified_c__Agaricomycetes	f__unclassified_c__Agaricomycetes	g__unclassified_c__Agaricomycetes	s__unclassified_c__Agaricomycetes	OTU1218	35	0	0	2	0	0	1	0	0	0	0	1	0	0	0	207	278	3	0	2	0	1	0	0	1	3	14	548
d__Eukaryota	k__Fungi	p__Ascomycota	c__Eurotiomycetes	o__Eurotiales	f__Aspergillaceae	g__Aspergillus	s__Aspergillus_penicillioides	OTU1215	0	1	0	1	0	0	0	4	0	0	0	0	0	0	0	3	9	3	0	0	0	0	1	0	0	1	0	23
d__Eukaryota	k__Fungi	p__Ascomycota	c__Sordariomycetes	o__unclassified_c__Sordariomycetes	f__unclassified_c__Sordariomycetes	g__unclassified_c__Sordariomycetes	s__unclassified_c__Sordariomycetes	OTU1240	1	0	2	0	0	0	0	0	0	0	0	0	0	0	0	4	142	1	0	0	1	2	1	0	0	0	0	154
d__Eukaryota	k__Fungi	p__unclassified_k__Fungi	c__unclassified_k__Fungi	o__unclassified_k__Fungi	f__unclassified_k__Fungi	g__unclassified_k__Fungi	s__unclassified_k__Fungi	OTU230	0	0	0	0	0	0	0	18	0	0	5	0	0	45	0	0	0	0	0	0	0	0	0	0	0	0	0	68
d__Eukaryota	k__Fungi	p__Mortierellomycota	c__Mortierellomycetes	o__Mortierellales	f__Mortierellaceae	g__Mortierella	s__Mortierella_elongata	OTU752	629	643	476	4977	636	950	2094	830	2017	410	2531	1996	870	1854	1031	738	360	1571	4747	775	349	1808	3186	929	1605	1689	422	40123
d__Eukaryota	k__Fungi	p__unclassified_k__Fungi	c__unclassified_k__Fungi	o__unclassified_k__Fungi	f__unclassified_k__Fungi	g__unclassified_k__Fungi	s__unclassified_k__Fungi	OTU442	0	7	0	0	0	0	3	0	0	0	0	0	0	0	0	1	0	0	0	0	3	2	0	0	0	0	0	16
d__Eukaryota	k__Fungi	p__Chytridiomycota	c__unclassified_p__Chytridiomycota	o__unclassified_p__Chytridiomycota	f__unclassified_p__Chytridiomycota	g__unclassified_p__Chytridiomycota	s__unclassified_p__Chytridiomycota	OTU570	0	1	0	0	2	10	3	8	3	0	105	25	2	18	0	1	0	0	131	1	16	32	2	20	4	5	1	390
d__Eukaryota	k__Fungi	p__Ascomycota	c__Sordariomycetes	o__Hypocreales	f__Hypocreales_fam_Incertae_sedis	g__Emericellopsis	s__Emericellopsis_terricola	OTU269	34	16	37	3	18	3	38	9	18	42	8	23	73	46	30	49	97	23	37	43	140	31	64	106	267	61	27	1343
d__Eukaryota	k__Fungi	p__Ascomycota	c__Sordariomycetes	o__unclassified_c__Sordariomycetes	f__unclassified_c__Sordariomycetes	g__unclassified_c__Sordariomycetes	s__unclassified_c__Sordariomycetes	OTU323	1	0	0	1	3	16	2	0	0	1	4	0	1	0	1	0	0	2	0	0	0	0	0	3	0	0	2	37
d__Eukaryota	k__Fungi	p__Ascomycota	c__unclassified_p__Ascomycota	o__unclassified_p__Ascomycota	f__unclassified_p__Ascomycota	g__unclassified_p__Ascomycota	s__unclassified_p__Ascomycota	OTU1065	0	2	4	0	0	0	0	0	0	0	0	0	0	0	0	1	5	2	0	0	0	0	0	2	0	9	2	27
d__Eukaryota	k__Fungi	p__Ascomycota	c__Eurotiomycetes	o__Eurotiales	f__Aspergillaceae	g__Aspergillus	s__Aspergillus_chlamydosporus	OTU667	0	5	2	0	0	0	0	0	3	3	0	2	0	2	1	0	0	0	1	5	0	0	1	0	0	0	0	25
d__Eukaryota	k__Fungi	p__Ascomycota	c__Sordariomycetes	o__Sordariales	f__Lasiosphaeriaceae	g__Schizothecium	s__unclassified_g__Schizothecium	OTU1217	0	0	0	0	0	0	0	0	0	0	0	0	0	0	0	4	5	4	1	0	0	0	0	0	0	0	0	14
d__Eukaryota	k__Fungi	p__Ascomycota	c__Sordariomycetes	o__Hypocreales	f__Nectriaceae	g__Gibberella	s__unclassified_g__Gibberella	OTU1015	28	12	28	0	0	0	2	1	3	4	2	1	24	0	2	1	0	3	0	0	3	0	4	3	19	12	9	161
d__Eukaryota	k__Fungi	p__Ascomycota	c__Dothideomycetes	o__Pleosporales	f__Massarinaceae	g__Massarina	s__Massarina_sp	OTU1195	2	0	0	0	0	0	0	0	0	0	0	0	0	0	0	0	6	0	0	0	0	0	4	0	0	0	0	12
d__Eukaryota	k__Fungi	p__Ascomycota	c__Sordariomycetes	o__Hypocreales	f__Hypocreales_fam_Incertae_sedis	g__Acremonium	s__unclassified_g__Acremonium	OTU505	7	0	9	0	0	0	0	0	0	0	0	0	0	0	0	0	0	0	0	0	0	0	1	0	0	0	0	17
d__Eukaryota	k__Fungi	p__unclassified_k__Fungi	c__unclassified_k__Fungi	o__unclassified_k__Fungi	f__unclassified_k__Fungi	g__unclassified_k__Fungi	s__unclassified_k__Fungi	OTU1229	0	0	0	0	0	0	0	0	0	0	0	0	0	0	0	0	7	0	5	0	0	0	0	3	0	0	0	15
d__Eukaryota	k__Fungi	p__Ascomycota	c__Sordariomycetes	o__Hypocreales	f__unclassified_o__Hypocreales	g__unclassified_o__Hypocreales	s__unclassified_o__Hypocreales	OTU631	53	17	43	0	6	17	17	5	11	14	2	7	21	11	2	71	34	14	27	123	148	4	1	59	20	26	4	757
d__Eukaryota	k__Fungi	p__Rozellomycota	c__unclassified_p__Rozellomycota	o__unclassified_p__Rozellomycota	f__unclassified_p__Rozellomycota	g__unclassified_p__Rozellomycota	s__Rozellomycota_sp	OTU929	0	0	0	114	0	3	35	0	0	4	0	3	21	0	48	4	1	0	29	0	22	214	1	0	41	0	1	541
d__Eukaryota	k__Fungi	p__Basidiomycota	c__Tremellomycetes	o__Filobasidiales	f__Piskurozymaceae	g__Solicoccozyma	s__Solicoccozyma_keelungensis	OTU1156	0	0	0	0	0	0	0	0	0	0	0	0	0	0	0	2	0	2	15	0	1	0	4	0	0	0	0	24
d__Eukaryota	k__Fungi	p__Ascomycota	c__Laboulbeniomycetes	o__Pyxidiophorales	f__Pyxidiophoraceae	g__Pyxidiophora	s__Pyxidiophora_arvernensis	OTU96	0	1	0	4	145	2	3	1	1	10	1	1	1	1	0	54	5	0	6	0	2	0	0	9	1	0	0	248
d__Eukaryota	k__Fungi	p__Basidiomycota	c__Agaricomycetes	o__Cantharellales	f__Ceratobasidiaceae	g__Rhizoctonia	s__Rhizoctonia_fusispora	OTU1249	0	0	2	0	0	0	0	0	0	0	0	0	0	0	0	4	4	0	0	0	0	0	0	4	0	0	3	17
d__Eukaryota	k__Fungi	p__Ascomycota	c__Sordariomycetes	o__Sordariales	f__Lasiosphaeriaceae	g__Cercophora	s__Cercophora_samala	OTU242	1	0	0	1	0	0	6	0	0	31	0	0	5	0	17	1	0	0	0	0	0	2	0	1	1	0	0	66
d__Eukaryota	k__Fungi	p__Basidiomycota	c__Tremellomycetes	o__Trichosporonales	f__Trichosporonaceae	g__Apiotrichum	s__unclassified_g__Apiotrichum	OTU491	9	0	9	0	0	0	0	0	0	0	0	0	0	0	0	0	0	0	0	0	0	0	0	0	5	0	0	23
d__Eukaryota	k__Fungi	p__Ascomycota	c__Sordariomycetes	o__Hypocreales	f__Nectriaceae	g__unclassified_f__Nectriaceae	s__unclassified_f__Nectriaceae	OTU696	118	127	140	8	9	19	20	21	14	43	36	17	35	69	20	19	68	35	16	39	56	23	30	87	53	50	55	1227
d__Eukaryota	k__Fungi	p__Ascomycota	c__Dothideomycetes	o__Pleosporales	f__Didymellaceae	g__Epicoccum	s__Epicoccum_nigrum	OTU1225	35	66	7	0	0	0	0	0	0	7	0	0	5	1	0	13	39	1	6	57	0	0	24	8	11	72	0	352
d__Eukaryota	k__Fungi	p__Ascomycota	c__Sordariomycetes	o__unclassified_c__Sordariomycetes	f__unclassified_c__Sordariomycetes	g__unclassified_c__Sordariomycetes	s__unclassified_c__Sordariomycetes	OTU159	0	0	0	0	0	10	0	0	7	2	0	3	0	0	2	0	0	6	2	0	0	3	0	1	3	0	0	39
d__Eukaryota	k__Fungi	p__Basidiomycota	c__Cystobasidiomycetes	o__Cystobasidiales	f__Cystobasidiaceae	g__Cystobasidium	s__Cystobasidium_laryngis	OTU351	0	0	2	2	0	0	0	0	0	0	0	0	0	0	0	1	6	0	0	0	1	0	0	0	0	0	0	12
d__Eukaryota	k__Fungi	p__Rozellomycota	c__unclassified_p__Rozellomycota	o__unclassified_p__Rozellomycota	f__unclassified_p__Rozellomycota	g__unclassified_p__Rozellomycota	s__Rozellomycota_sp	OTU331	0	0	0	0	1	1	0	2	0	0	3	11	0	1	2	0	0	0	0	0	0	0	0	0	0	0	0	21
d__Eukaryota	k__Fungi	p__Basidiomycota	c__Tremellomycetes	o__Tremellales	f__Bulleribasidiaceae	g__Vishniacozyma	s__unclassified_g__Vishniacozyma	OTU608	0	0	0	11	0	9	4	0	0	0	0	0	0	42	0	0	0	0	9	0	1	0	0	0	0	0	0	76
d__Eukaryota	k__Fungi	p__Ascomycota	c__Eurotiomycetes	o__Eurotiales	f__Aspergillaceae	g__Penicillium	s__Penicillium_rubidurum	OTU1061	0	0	1	0	0	0	0	0	0	0	0	0	3	0	0	0	0	1	0	0	0	2	0	1	4	2	1	15
d__Eukaryota	k__Fungi	p__Basidiomycota	c__Tremellomycetes	o__Tremellales	f__Bulleribasidiaceae	g__Vishniacozyma	s__Vishniacozyma_carnescens	OTU461	1	29	18	0	0	1	0	0	0	0	0	0	0	0	2	1	35	0	13	0	2	12	21	3	0	22	12	172
d__Eukaryota	k__Fungi	p__Ascomycota	c__Eurotiomycetes	o__Eurotiales	f__Trichocomaceae	g__Sagenomella	s__Sagenomella_oligospora	OTU1211	6	0	0	0	0	3	0	0	0	0	0	0	0	0	0	0	4	2	0	0	2	0	1	2	0	4	8	32
d__Eukaryota	k__Fungi	p__Ascomycota	c__Dothideomycetes	o__Pleosporales	f__Didymosphaeriaceae	g__Paraphaeosphaeria	s__Paraphaeosphaeria_sporulosa	OTU1120	0	0	15	0	0	0	0	0	0	0	0	0	0	0	0	0	58	0	11	1	0	0	0	10	0	2	12	109
d__Eukaryota	k__Fungi	p__unclassified_k__Fungi	c__unclassified_k__Fungi	o__unclassified_k__Fungi	f__unclassified_k__Fungi	g__unclassified_k__Fungi	s__unclassified_k__Fungi	OTU1126	0	0	0	0	2	0	0	0	0	0	0	0	4	0	0	0	0	0	0	0	0	0	0	0	0	0	42	48
d__Eukaryota	k__Fungi	p__Ascomycota	c__Sordariomycetes	o__Trichosphaeriales	f__Trichosphaeriaceae	g__Nigrospora	s__Nigrospora_oryzae	OTU519	1	20	6	0	0	1	1	0	0	1	0	0	0	0	0	6	16	1	1	0	1	0	0	0	7	4	3	69
d__Eukaryota	k__Fungi	p__unclassified_k__Fungi	c__unclassified_k__Fungi	o__unclassified_k__Fungi	f__unclassified_k__Fungi	g__unclassified_k__Fungi	s__unclassified_k__Fungi	OTU749	0	0	0	0	0	0	2	0	0	2	0	0	2	0	6	0	0	0	67	0	6	26	0	0	0	0	0	111
d__Eukaryota	k__Fungi	p__Basidiomycota	c__Agaricomycetes	o__Thelephorales	f__Thelephoraceae	g__unclassified_f__Thelephoraceae	s__Thelephoraceae_sp	OTU1256	1559	2893	1691	0	0	0	0	0	0	0	0	0	0	0	0	1086	1335	635	264	234	12	15	449	574	528	1529	1646	14450
d__Eukaryota	k__Fungi	p__Ascomycota	c__Eurotiomycetes	o__Eurotiales	f__Aspergillaceae	g__Penicillium	s__Penicillium_oxalicum	OTU101	5	0	3	1	5	0	4	0	2	5	1	0	12	59	4	12	7	0	0	7	19	5	0	3	226	0	0	380
d__Eukaryota	k__Fungi	p__unclassified_k__Fungi	c__unclassified_k__Fungi	o__unclassified_k__Fungi	f__unclassified_k__Fungi	g__unclassified_k__Fungi	s__unclassified_k__Fungi	OTU934	0	0	17	39	0	4	7	0	15	0	0	0	0	0	0	0	0	0	91	0	364	113	0	0	59	0	49	758
d__Eukaryota	k__Fungi	p__unclassified_k__Fungi	c__unclassified_k__Fungi	o__unclassified_k__Fungi	f__unclassified_k__Fungi	g__unclassified_k__Fungi	s__unclassified_k__Fungi	OTU931	0	0	0	1	0	1	1	0	0	7	1	5	0	18	6	0	0	0	0	0	1	3	0	0	3	0	0	47
d__Eukaryota	k__Fungi	p__Ascomycota	c__Sordariomycetes	o__Microascales	f__Microascaceae	g__Scedosporium	s__Scedosporium_dehoogii	OTU629	2	0	2	0	0	0	2	0	0	0	6	0	0	0	0	0	0	12	0	33	4	0	0	3	0	2	0	66
d__Eukaryota	k__Fungi	p__unclassified_k__Fungi	c__unclassified_k__Fungi	o__unclassified_k__Fungi	f__unclassified_k__Fungi	g__unclassified_k__Fungi	s__unclassified_k__Fungi	OTU413	0	14	0	0	0	0	0	0	0	0	0	0	0	0	0	0	0	0	5	8	0	0	1	5	1	0	14	48
d__Eukaryota	k__Fungi	p__Ascomycota	c__Sordariomycetes	o__unclassified_c__Sordariomycetes	f__unclassified_c__Sordariomycetes	g__unclassified_c__Sordariomycetes	s__unclassified_c__Sordariomycetes	OTU126	0	39	0	0	10	0	2	84	10	17	226	1	12	16	13	0	4	29	0	14	21	21	30	5	2	17	17	590
d__Eukaryota	k__Fungi	p__Basidiomycota	c__Agaricomycetes	o__Cantharellales	f__Ceratobasidiaceae	g__unclassified_f__Ceratobasidiaceae	s__Ceratobasidiaceae_sp	OTU906	0	0	10	0	0	0	0	0	0	0	0	0	0	0	0	2	0	0	0	5	0	0	0	1	2	0	0	20
d__Eukaryota	k__Fungi	p__unclassified_k__Fungi	c__unclassified_k__Fungi	o__unclassified_k__Fungi	f__unclassified_k__Fungi	g__unclassified_k__Fungi	s__unclassified_k__Fungi	OTU1078	0	0	0	0	0	0	6	0	0	0	0	3	0	0	4	0	0	2	1	0	0	1	0	0	20	0	8	45
d__Eukaryota	k__Fungi	p__Ascomycota	c__Eurotiomycetes	o__Onygenales	f__Arthrodermataceae	g__Arthroderma	s__Arthroderma_multifidum	OTU663	0	0	0	0	0	0	0	0	0	0	0	0	3	0	0	0	0	0	0	2	1	2	0	2	1	0	0	11
d__Eukaryota	k__Fungi	p__Ascomycota	c__Leotiomycetes	o__Helotiales	f__Hyaloscyphaceae	g__Cistella	s__Cistella_sp	OTU459	13	13	0	0	0	0	0	0	0	0	0	0	0	0	0	4	0	10	3	4	0	0	0	1	4	0	2	54
d__Eukaryota	k__Fungi	p__Ascomycota	c__Leotiomycetes	o__Helotiales	f__Vibrisseaceae	g__Phialocephala	s__Phialocephala_humicola	OTU1124	26	57	11	0	0	0	0	0	0	0	0	0	0	0	0	0	0	12	0	0	3	0	25	5	37	7	18	201
d__Eukaryota	k__Fungi	p__Basidiomycota	c__Tremellomycetes	o__Tremellales	f__Bulleribasidiaceae	g__Vishniacozyma	s__Vishniacozyma_sp	OTU778	19	54	44	25	0	20	5	27	1	6	0	4	14	0	0	10	48	22	17	22	10	40	50	30	7	27	46	548
d__Eukaryota	k__Fungi	p__unclassified_k__Fungi	c__unclassified_k__Fungi	o__unclassified_k__Fungi	f__unclassified_k__Fungi	g__unclassified_k__Fungi	s__unclassified_k__Fungi	OTU859	1	10	0	0	0	1	0	0	1	0	0	6	0	0	8	0	0	7	1	0	1	0	0	2	1	0	35	74
d__Eukaryota	k__Fungi	p__unclassified_k__Fungi	c__unclassified_k__Fungi	o__unclassified_k__Fungi	f__unclassified_k__Fungi	g__unclassified_k__Fungi	s__unclassified_k__Fungi	OTU397	30	44	22	0	0	0	0	0	0	0	0	0	0	0	0	0	17	10	4	0	5	24	0	3	0	0	22	181
d__Eukaryota	k__Fungi	p__Ascomycota	c__Dothideomycetes	o__Dothideomycetes_ord_Incertae_sedis	f__Eremomycetaceae	g__Arthrographis	s__unclassified_g__Arthrographis	OTU1312	14	39	43	11	13	4	64	3	3	10	2	4	7	8	4	8	30	6	1	48	13	10	6	15	2	9	39	416
d__Eukaryota	k__Fungi	p__Basidiomycota	c__Agaricomycetes	o__Cantharellales	f__Ceratobasidiaceae	g__unclassified_f__Ceratobasidiaceae	s__Ceratobasidiaceae_sp	OTU509	0	0	17	0	0	0	0	0	0	0	0	0	0	0	0	0	0	0	0	2	0	0	3	0	0	3	1	26
d__Eukaryota	k__Fungi	p__Basidiomycota	c__Agaricomycetes	o__Thelephorales	f__Thelephoraceae	g__Tomentella	s__unclassified_g__Tomentella	OTU356	30	47	8	0	0	0	0	0	0	0	0	0	0	0	0	4	0	0	0	0	0	0	0	5	18	20	0	132
d__Eukaryota	k__Fungi	p__Zoopagomycota	c__Zoopagomycetes	o__Zoopagales	f__Piptocephalidaceae	g__Syncephalis	s__Syncephalis_sp	OTU1122	1	0	7	6	0	0	0	0	1	1	0	0	6	0	1	0	3	0	0	0	1	0	0	2	0	0	57	86
d__Eukaryota	k__Fungi	p__Mortierellomycota	c__Mortierellomycetes	o__Mortierellales	f__Mortierellaceae	g__Mortierella	s__Mortierella_elongatula	OTU899	20	0	0	0	3	0	0	1	0	10	0	5	6	6	10	0	0	1	1	0	1	1	0	7	7	6	15	100
d__Eukaryota	k__Fungi	p__unclassified_k__Fungi	c__unclassified_k__Fungi	o__unclassified_k__Fungi	f__unclassified_k__Fungi	g__unclassified_k__Fungi	s__unclassified_k__Fungi	OTU1270	0	0	0	0	0	0	4	0	0	0	0	0	0	0	17	0	19	27	0	0	221	0	0	0	3	0	17	308
d__Eukaryota	k__Fungi	p__unclassified_k__Fungi	c__unclassified_k__Fungi	o__unclassified_k__Fungi	f__unclassified_k__Fungi	g__unclassified_k__Fungi	s__unclassified_k__Fungi	OTU404	2	211	14	20	4	15	7	6	18	9	16	10	0	31	34	0	0	3	0	25	3	0	8	20	7	4	4	471
d__Eukaryota	k__Fungi	p__Basidiomycota	c__Agaricomycetes	o__Thelephorales	f__Thelephoraceae	g__Thelephora	s__Thelephora_atra	OTU606	26	184	46	0	0	0	0	0	0	0	0	0	0	0	0	31	26	26	5	3	0	1	18	14	17	76	77	550
d__Eukaryota	k__Fungi	p__unclassified_k__Fungi	c__unclassified_k__Fungi	o__unclassified_k__Fungi	f__unclassified_k__Fungi	g__unclassified_k__Fungi	s__unclassified_k__Fungi	OTU1323	0	0	0	0	0	0	0	0	0	0	0	0	0	0	0	0	19	7	0	0	0	0	11	0	0	0	0	37
d__Eukaryota	k__Fungi	p__unclassified_k__Fungi	c__unclassified_k__Fungi	o__unclassified_k__Fungi	f__unclassified_k__Fungi	g__unclassified_k__Fungi	s__unclassified_k__Fungi	OTU1085	0	0	0	0	0	0	4	0	0	0	24	2	4	0	6	0	0	15	1	0	11	20	0	10	48	0	18	163
d__Eukaryota	k__Fungi	p__unclassified_k__Fungi	c__unclassified_k__Fungi	o__unclassified_k__Fungi	f__unclassified_k__Fungi	g__unclassified_k__Fungi	s__unclassified_k__Fungi	OTU688	0	0	0	1	3	0	0	2	0	0	1	3	1	1	14	0	0	0	0	0	1	1	0	1	1	0	0	30
d__Eukaryota	k__Fungi	p__Mortierellomycota	c__Mortierellomycetes	o__Mortierellales	f__Mortierellaceae	g__Mortierella	s__Mortierella_ambigua	OTU922	106	27	76	48	6	0	12	11	9	3	23	11	7	53	14	2	13	7	8	8	7	11	5	15	27	48	32	589
d__Eukaryota	k__Fungi	p__Ascomycota	c__Dothideomycetes	o__Pleosporales	f__Pleosporales_fam_Incertae_sedis	g__Polyschema	s__Polyschema_sclerotigenum	OTU394	53	17	2	0	0	0	0	0	0	0	1	0	0	43	0	0	0	3	0	0	1	0	0	4	0	0	0	124
d__Eukaryota	k__Fungi	p__unclassified_k__Fungi	c__unclassified_k__Fungi	o__unclassified_k__Fungi	f__unclassified_k__Fungi	g__unclassified_k__Fungi	s__unclassified_k__Fungi	OTU599	0	0	0	7	0	0	0	0	0	0	0	0	0	0	0	0	0	0	289	0	0	0	0	0	4	0	0	300
d__Eukaryota	k__Fungi	p__Ascomycota	c__Leotiomycetes	o__Helotiales	f__Helotiales_fam_Incertae_sedis	g__Mycoarthris	s__Mycoarthris_sp	OTU1326	0	0	12	0	0	0	0	0	0	0	0	0	0	0	0	0	0	10	0	0	0	0	6	0	1	10	8	47
d__Eukaryota	k__Fungi	p__Basidiomycota	c__unclassified_p__Basidiomycota	o__unclassified_p__Basidiomycota	f__unclassified_p__Basidiomycota	g__unclassified_p__Basidiomycota	s__unclassified_p__Basidiomycota	OTU613	7	50	2	31	23	21	33	23	52	5	10	4	34	0	11	81	38	4	522	20	8	36	30	5	16	17	35	1118
d__Eukaryota	k__Fungi	p__Ascomycota	c__Sordariomycetes	o__Hypocreales	f__Nectriaceae	g__Neocosmospora	s__Neocosmospora_rubicola	OTU1052	152	311	207	61	31	53	43	32	45	95	84	41	72	261	40	18	74	131	37	128	91	55	88	240	151	146	107	2794
d__Eukaryota	k__Fungi	p__Ascomycota	c__Archaeorhizomycetes	o__unclassified_c__Archaeorhizomycetes	f__unclassified_c__Archaeorhizomycetes	g__unclassified_c__Archaeorhizomycetes	s__unclassified_c__Archaeorhizomycetes	OTU1320	0	31	13	0	0	0	0	0	0	0	0	0	0	0	0	0	0	11	0	0	0	0	0	0	8	0	28	91
d__Eukaryota	k__Fungi	p__Glomeromycota	c__Paraglomeromycetes	o__Paraglomerales	f__unclassified_o__Paraglomerales	g__unclassified_o__Paraglomerales	s__unclassified_o__Paraglomerales	OTU1243	0	50	10	0	0	0	0	0	0	0	0	0	0	0	0	4	42	4	6	2	0	0	2	5	4	9	0	138
d__Eukaryota	k__Fungi	p__Ascomycota	c__Sordariomycetes	o__Sordariales	f__Chaetomiaceae	g__Chaetomium	s__unclassified_g__Chaetomium	OTU205	13	4	22	1	14	12	11	1	20	93	1	11	121	60	12	119	31	8	14	13	782	16	0	122	180	36	0	1717
d__Eukaryota	k__Fungi	p__Basidiomycota	c__Tremellomycetes	o__Filobasidiales	f__Filobasidiaceae	g__Naganishia	s__Naganishia_randhawae	OTU1210	6	16	21	0	0	0	0	0	0	0	0	0	0	0	0	9	2	0	3	10	0	0	14	6	0	5	17	109
d__Eukaryota	k__Fungi	p__unclassified_k__Fungi	c__unclassified_k__Fungi	o__unclassified_k__Fungi	f__unclassified_k__Fungi	g__unclassified_k__Fungi	s__unclassified_k__Fungi	OTU1252	8	21	5	17	7	12	2	4	7	4	53	5	0	9	17	4	13	0	1	1	5	5	0	3	18	4	15	240
d__Eukaryota	k__Fungi	p__unclassified_k__Fungi	c__unclassified_k__Fungi	o__unclassified_k__Fungi	f__unclassified_k__Fungi	g__unclassified_k__Fungi	s__unclassified_k__Fungi	OTU1087	1	0	0	9	0	0	0	4	0	0	7	0	0	0	0	0	0	0	0	0	2	2	0	0	5	5	69	104
d__Eukaryota	k__Fungi	p__Mortierellomycota	c__unclassified_p__Mortierellomycota	o__unclassified_p__Mortierellomycota	f__unclassified_p__Mortierellomycota	g__unclassified_p__Mortierellomycota	s__Mortierellomycotina	OTU204	0	0	0	0	0	0	2	0	0	0	0	4	0	8	0	0	15	0	0	0	0	0	0	0	0	0	0	29
d__Eukaryota	k__Fungi	p__Aphelidiomycota	c__Aphelidiomycetes	o__GS16	f__unclassified_o__GS16	g__unclassified_o__GS16	s__GS16_sp	OTU307	8	0	7	0	0	11	0	7	0	0	6	3	0	8	2	0	0	1	1	7	1	4	0	13	0	2	0	81
d__Eukaryota	k__Fungi	p__Ascomycota	c__Sordariomycetes	o__unclassified_c__Sordariomycetes	f__unclassified_c__Sordariomycetes	g__unclassified_c__Sordariomycetes	s__unclassified_c__Sordariomycetes	OTU299	0	3	0	0	8	0	3	1	0	0	2	0	2	5	0	0	0	0	0	3	0	0	0	1	9	0	0	37
d__Eukaryota	k__Fungi	p__Ascomycota	c__Dothideomycetes	o__Pleosporales	f__Didymosphaeriaceae	g__Paraphaeosphaeria	s__Paraphaeosphaeria_sporulosa	OTU1281	6	49	5	0	0	0	0	0	0	0	0	0	0	0	0	8	8	1	3	0	0	0	0	0	3	0	3	86
d__Eukaryota	k__Fungi	p__Chytridiomycota	c__Rhizophydiomycetes	o__Rhizophydiales	f__Rhizophydiaceae	g__Rhizophydium	s__Rhizophydium_collapsum	OTU74	1	0	0	0	0	0	0	0	3	0	0	0	0	0	0	0	0	28	0	0	1	0	0	0	0	0	0	33
d__Eukaryota	k__Fungi	p__unclassified_k__Fungi	c__unclassified_k__Fungi	o__unclassified_k__Fungi	f__unclassified_k__Fungi	g__unclassified_k__Fungi	s__unclassified_k__Fungi	OTU444	0	11	3	0	0	0	0	0	0	0	0	0	0	0	0	0	0	0	0	0	0	0	0	2	0	0	0	16
d__Eukaryota	k__Fungi	p__Basidiomycota	c__Agaricomycetes	o__Tremellodendropsidales	f__unclassified_o__Tremellodendropsidales	g__unclassified_o__Tremellodendropsidales	s__Tremellodendropsidales_sp	OTU1313	0	0	0	0	0	0	0	0	0	0	0	0	0	0	0	0	0	5	0	1	0	0	3	0	0	0	0	9
d__Eukaryota	k__Fungi	p__unclassified_k__Fungi	c__unclassified_k__Fungi	o__unclassified_k__Fungi	f__unclassified_k__Fungi	g__unclassified_k__Fungi	s__unclassified_k__Fungi	OTU446	1	19	0	0	0	0	0	0	0	1	3	3	0	0	1	0	0	3	0	0	0	0	0	1	0	0	0	32
d__Eukaryota	k__Fungi	p__unclassified_k__Fungi	c__unclassified_k__Fungi	o__unclassified_k__Fungi	f__unclassified_k__Fungi	g__unclassified_k__Fungi	s__unclassified_k__Fungi	OTU843	38	0	33	0	0	0	0	0	0	0	0	0	0	0	0	0	0	0	0	0	0	0	35	0	0	0	0	106
d__Eukaryota	k__Fungi	p__Ascomycota	c__Leotiomycetes	o__Helotiales	f__Helotiales_fam_Incertae_sedis	g__Chalara	s__Chalara_heteroderae	OTU860	5	0	3	0	2	0	0	0	0	0	0	0	3	0	0	0	0	0	0	2	5	0	0	2	4	0	0	26
d__Eukaryota	k__Fungi	p__Ascomycota	c__Pezizomycetes	o__Pezizales	f__Ascobolaceae	g__Ascobolus	s__Ascobolus_sp	OTU295	8	19	8	1	4	1	0	1	0	0	4	2	2	4	3	0	0	0	0	0	0	0	2	0	0	4	0	63
d__Eukaryota	k__Fungi	p__Ascomycota	c__Sordariomycetes	o__Sordariales	f__Lasiosphaeriaceae	g__Schizothecium	s__unclassified_g__Schizothecium	OTU281	2	1	10	3	1	1	13	12	15	5	22	0	10	1	18	9	40	2	35	9	21	19	53	6	98	11	4	421
d__Eukaryota	k__Fungi	p__Ascomycota	c__Sordariomycetes	o__Sordariales	f__Lasiosphaeriaceae	g__Echria	s__Echria_sp	OTU377	23	0	31	0	0	0	0	0	0	0	0	0	0	0	0	0	0	12	0	7	8	7	0	6	0	3	7	104
d__Eukaryota	k__Fungi	p__unclassified_k__Fungi	c__unclassified_k__Fungi	o__unclassified_k__Fungi	f__unclassified_k__Fungi	g__unclassified_k__Fungi	s__unclassified_k__Fungi	OTU389	21	7	1	0	0	0	1	2	0	0	5	0	9	0	0	0	3	0	0	5	2	4	5	0	0	0	6	71
d__Eukaryota	k__Fungi	p__Ascomycota	c__Sordariomycetes	o__Hypocreales	f__Nectriaceae	g__Fusicolla	s__Fusicolla_aquaeductuum	OTU4	2	0	1	0	2	0	2	0	1	4	0	0	1	0	1	1	13	0	1	1	0	2	0	1	8	0	0	41
d__Eukaryota	k__Fungi	p__unclassified_k__Fungi	c__unclassified_k__Fungi	o__unclassified_k__Fungi	f__unclassified_k__Fungi	g__unclassified_k__Fungi	s__unclassified_k__Fungi	OTU1108	0	0	0	14	0	0	0	5	0	0	7	0	2	0	0	0	0	0	0	0	0	0	0	0	0	0	11	39
d__Eukaryota	k__Fungi	p__unclassified_k__Fungi	c__unclassified_k__Fungi	o__unclassified_k__Fungi	f__unclassified_k__Fungi	g__unclassified_k__Fungi	s__unclassified_k__Fungi	OTU1100	0	0	0	0	0	0	0	0	0	0	0	0	0	0	0	0	0	0	2	0	0	0	0	4	0	0	4	10
d__Eukaryota	k__Fungi	p__Basidiomycota	c__unclassified_p__Basidiomycota	o__unclassified_p__Basidiomycota	f__unclassified_p__Basidiomycota	g__unclassified_p__Basidiomycota	s__unclassified_p__Basidiomycota	OTU1185	2	0	0	1	0	0	0	0	3	0	0	1	0	0	4	4	0	0	0	0	0	0	0	0	1	1	0	17
d__Eukaryota	k__Fungi	p__Basidiomycota	c__Wallemiomycetes	o__Wallemiales	f__Wallemiaceae	g__Wallemia	s__Wallemia_sp	OTU567	0	0	0	0	0	0	0	0	0	0	0	0	0	0	0	0	0	17	2	3	11	9	4	4	0	0	0	50
d__Eukaryota	k__Fungi	p__Ascomycota	c__Sordariomycetes	o__Sordariales	f__Chaetomiaceae	g__Chaetomium	s__Chaetomium_sp	OTU1159	21	7	46	1	43	86	63	8	62	92	18	27	161	209	35	93	56	19	23	53	821	34	3	100	418	104	1	2604
d__Eukaryota	k__Fungi	p__Basidiomycota	c__Agaricomycetes	o__Russulales	f__unclassified_o__Russulales	g__unclassified_o__Russulales	s__unclassified_o__Russulales	OTU1303	7	23	0	0	0	0	0	0	0	0	0	0	0	0	0	13	6	3	0	0	0	0	0	1	4	0	1	58
d__Eukaryota	k__Fungi	p__Basidiomycota	c__Tremellomycetes	o__Tremellales	f__Bulleribasidiaceae	g__Hannaella	s__Hannaella_oryzae	OTU317	23	145	0	0	17	19	2	1	36	2	5	20	0	0	10	7	14	3	23	0	40	3	17	26	0	19	0	432
d__Eukaryota	k__Fungi	p__Olpidiomycota	c__Olpidiomycetes	o__Olpidiales	f__Olpidiaceae	g__Olpidium	s__Olpidium_sp	OTU114	0	14	0	1	0	0	0	2	0	0	29	0	0	0	0	5	4	0	5	0	0	0	0	29	8	11	1	109
d__Eukaryota	k__Fungi	p__Ascomycota	c__Dothideomycetes	o__Pleosporales	f__unclassified_o__Pleosporales	g__unclassified_o__Pleosporales	s__unclassified_o__Pleosporales	OTU373	42	0	8	0	0	1	0	0	3	0	0	0	0	1	0	7	0	10	2	30	0	0	0	0	21	14	45	184
d__Eukaryota	k__Fungi	p__Basidiomycota	c__Malasseziomycetes	o__Malasseziales	f__Malasseziaceae	g__Malassezia	s__Malassezia_sp	OTU499	2	0	32	0	0	0	1	1	0	2	1	0	8	0	0	4	7	0	5	1	2	0	0	2	24	0	1	93
d__Eukaryota	k__Fungi	p__Basidiomycota	c__Tremellomycetes	o__Tremellales	f__Tremellaceae	g__Cryptococcus_f__Tremellaceae	s__Cryptococcus_rajasthanensis	OTU75	0	7	0	15	0	9	0	0	5	0	0	0	0	0	0	0	0	0	0	0	0	0	2	1	0	4	0	43
d__Eukaryota	k__Fungi	p__Basidiomycota	c__Microbotryomycetes	o__Sporidiobolales	f__Sporidiobolaceae	g__Rhodotorula	s__Rhodotorula_ingeniosa	OTU262	1	0	0	3	0	0	0	0	0	0	0	0	2	0	3	0	5	0	0	0	0	2	4	0	4	6	11	41
d__Eukaryota	k__Fungi	p__unclassified_k__Fungi	c__unclassified_k__Fungi	o__unclassified_k__Fungi	f__unclassified_k__Fungi	g__unclassified_k__Fungi	s__unclassified_k__Fungi	OTU579	0	0	0	0	3	11	19	0	0	5	0	0	0	0	1	0	24	1	3	0	3	6	0	0	0	0	0	76
d__Eukaryota	k__Fungi	p__Zoopagomycota	c__Zoopagomycetes	o__Zoopagales	f__Zoopagaceae	g__Acaulopage	s__Acaulopage_sp	OTU819	0	0	0	0	0	2	0	0	0	45	5	2	0	2	6	0	1	0	8	0	1	2	29	2	5	0	5	115
d__Eukaryota	k__Fungi	p__unclassified_k__Fungi	c__unclassified_k__Fungi	o__unclassified_k__Fungi	f__unclassified_k__Fungi	g__unclassified_k__Fungi	s__unclassified_k__Fungi	OTU1076	0	0	0	0	0	0	0	4	14	0	12	0	0	0	1	3	0	0	0	6	0	0	31	6	1	0	117	195
d__Eukaryota	k__Fungi	p__unclassified_k__Fungi	c__unclassified_k__Fungi	o__unclassified_k__Fungi	f__unclassified_k__Fungi	g__unclassified_k__Fungi	s__unclassified_k__Fungi	OTU1070	13	6	74	0	0	0	0	0	0	0	0	0	0	0	0	8	16	26	16	5	0	0	14	35	4	30	34	281
d__Eukaryota	k__Fungi	p__Ascomycota	c__Sordariomycetes	o__unclassified_c__Sordariomycetes	f__unclassified_c__Sordariomycetes	g__unclassified_c__Sordariomycetes	s__unclassified_c__Sordariomycetes	OTU318	0	0	0	11	0	8	0	0	0	0	0	0	0	0	0	0	0	0	1	0	0	0	0	1	0	0	0	21
d__Eukaryota	k__Fungi	p__unclassified_k__Fungi	c__unclassified_k__Fungi	o__unclassified_k__Fungi	f__unclassified_k__Fungi	g__unclassified_k__Fungi	s__unclassified_k__Fungi	OTU980	0	0	0	22	8	5	2	2	5	39	32	32	7	31	34	14	0	3	2	1	23	21	0	17	213	1	27	541
d__Eukaryota	k__Fungi	p__Mortierellomycota	c__Mortierellomycetes	o__Mortierellales	f__Mortierellaceae	g__Mortierella	s__Mortierella_capitata	OTU1139	4	0	3	0	0	1	1	0	2	14	0	1	4	7	0	12	1	0	0	0	5	0	0	6	5	1	0	67
d__Eukaryota	k__Fungi	p__Ascomycota	c__Sordariomycetes	o__Hypoceales	f__Catabotrydaceae	g__Botryosporium	s__Botryosporium_longibrachiatum	OTU993	3	0	6	0	0	0	1	0	2	3	0	0	1	5	0	6	4	0	0	0	42	0	0	0	16	0	0	89
d__Eukaryota	k__Fungi	p__Basidiomycota	c__Agaricomycetes	o__Russulales	f__Russulaceae	g__Russula	s__Russula_medullata	OTU1304	366	675	398	0	0	0	0	0	0	0	0	0	0	0	0	292	445	111	88	32	2	0	53	141	124	351	261	3339
d__Eukaryota	k__Fungi	p__Ascomycota	c__Orbiliomycetes	o__Orbiliales	f__Orbiliales_fam_Incertae_sedis	g__Vermispora	s__Vermispora_spermatophaga	OTU215	2	0	1	0	0	0	0	1	1	2	1	0	0	5	0	0	0	0	0	0	0	0	0	7	0	12	0	32
d__Eukaryota	k__Fungi	p__Ascomycota	c__Sordariomycetes	o__Microascales	f__Microascaceae	g__unclassified_f__Microascaceae	s__unclassified_f__Microascaceae	OTU791	1196	1074	1453	184	752	1311	778	534	1332	1424	1093	1378	3713	3100	1036	324	791	1024	540	2230	834	1370	2033	1294	3622	4033	694	39147
d__Eukaryota	k__Fungi	p__Ascomycota	c__Dothideomycetes	o__Capnodiales	f__Cladosporiaceae	g__Cladosporium	s__Cladosporium_delicatulum	OTU1226	9	2	27	0	7	13	3	1	8	9	0	0	2	0	1	72	116	3	6	19	24	0	1	9	3	8	0	343
d__Eukaryota	k__Fungi	p__Mortierellomycota	c__Mortierellomycetes	o__Mortierellales	f__Mortierellaceae	g__Mortierella	s__unclassified_g__Mortierella	OTU1090	10	0	15	21	1	7	14	10	9	3	9	6	5	19	11	8	9	5	25	1	3	15	18	1	11	8	16	260
d__Eukaryota	k__Fungi	p__Ascomycota	c__Sordariomycetes	o__Glomerellales	f__Plectosphaerellaceae	g__Plectosphaerella	s__Plectosphaerella_sp	OTU57	3	0	0	0	0	1	0	0	4	0	0	0	1	0	2	0	0	3	0	0	0	0	0	0	0	0	1	15
d__Eukaryota	k__Fungi	p__Rozellomycota	c__Rozellomycotina_cls_Incertae_sedis	o__Branch03	f__unclassified_o__Branch03	g__unclassified_o__Branch03	s__Branch03_sp	OTU847	0	27	12	0	0	2	0	0	0	0	0	0	0	0	0	0	0	5	0	36	2	0	48	8	40	0	0	180
d__Eukaryota	k__Fungi	p__Ascomycota	c__Leotiomycetes	o__unclassified_c__Leotiomycetes	f__unclassified_c__Leotiomycetes	g__unclassified_c__Leotiomycetes	s__unclassified_c__Leotiomycetes	OTU1203	11	13	20	0	0	0	0	0	0	0	0	0	0	0	0	31	166	4	8	16	0	0	0	2	10	13	2	296
d__Eukaryota	k__Fungi	p__unclassified_k__Fungi	c__unclassified_k__Fungi	o__unclassified_k__Fungi	f__unclassified_k__Fungi	g__unclassified_k__Fungi	s__unclassified_k__Fungi	OTU841	5	0	27	41	1	12	2	3	3	19	24	13	0	225	9	0	0	0	1	9	1	79	824	122	902	7	761	3090
d__Eukaryota	k__Fungi	p__unclassified_k__Fungi	c__unclassified_k__Fungi	o__unclassified_k__Fungi	f__unclassified_k__Fungi	g__unclassified_k__Fungi	s__unclassified_k__Fungi	OTU475	8	8	8	0	0	0	0	0	0	0	0	1	0	0	0	2	0	1	0	0	0	0	0	4	0	13	0	45
d__Eukaryota	k__Fungi	p__Ascomycota	c__Archaeorhizomycetes	o__Archaeorhizomycetales	f__Archaeorhizomycetaceae	g__Archaeorhizomyces	s__Archaeorhizomyces_sp	OTU601	0	25	0	0	0	0	0	0	0	0	0	0	0	0	0	0	0	13	11	0	0	0	20	2	6	14	0	91
d__Eukaryota	k__Fungi	p__unclassified_k__Fungi	c__unclassified_k__Fungi	o__unclassified_k__Fungi	f__unclassified_k__Fungi	g__unclassified_k__Fungi	s__unclassified_k__Fungi	OTU709	0	0	0	2	3	5	1	0	5	9	7	2	1	3	5	0	0	0	0	0	0	2	0	0	2	0	0	47
d__Eukaryota	k__Fungi	p__unclassified_k__Fungi	c__unclassified_k__Fungi	o__unclassified_k__Fungi	f__unclassified_k__Fungi	g__unclassified_k__Fungi	s__unclassified_k__Fungi	OTU695	31	9	26	57	7	0	27	0	10	3	11	8	6	0	20	7	5	219	14	2	68	12	3	47	142	11	76	821
d__Eukaryota	k__Fungi	p__Ascomycota	c__Pezizomycetes	o__Pezizales	f__Ascodesmidaceae	g__Cephaliophora	s__Cephaliophora_sp	OTU1113	0	0	18	0	1	1	1	0	7	0	6	3	8	0	1	0	4	0	0	0	2	0	1	0	2	0	18	73
d__Eukaryota	k__Fungi	p__Basidiomycota	c__Tremellomycetes	o__Tremellales	f__Bulleraceae	g__Bullera	s__Bullera_alba	OTU960	6	7	22	16	3	5	2	3	1	3	0	1	3	10	85	104	0	0	3	0	5	4	2	0	19	5	19	328
d__Eukaryota	k__Fungi	p__unclassified_k__Fungi	c__unclassified_k__Fungi	o__unclassified_k__Fungi	f__unclassified_k__Fungi	g__unclassified_k__Fungi	s__unclassified_k__Fungi	OTU324	4	0	0	0	0	34	0	0	0	0	0	0	0	0	0	0	0	1	1	0	167	0	0	3	0	0	65	275
d__Eukaryota	k__Fungi	p__Ascomycota	c__Eurotiomycetes	o__Chaetothyriales	f__Herpotrichiellaceae	g__Cladophialophora	s__Cladophialophora_chaetospira	OTU441	7	7	0	0	0	0	0	0	0	0	0	0	0	0	0	3	10	0	0	3	0	0	1	7	1	11	2	52
d__Eukaryota	k__Fungi	p__Basidiomycota	c__Agaricomycetes	o__Sebacinales	f__Serendipitaceae	g__Serendipita	s__Serendipita_sp	OTU830	0	0	0	0	0	0	0	0	0	0	0	0	0	0	0	12	0	0	0	2	1	0	6	0	0	0	0	21
d__Eukaryota	k__Fungi	p__Ascomycota	c__Pezizomycetes	o__Pezizales	f__Ascodesmidaceae	g__Eleutherascus	s__Eleutherascus_cristatus	OTU206	0	18	10	0	0	0	0	2	3	1	1	0	1	8	0	0	0	2	1	0	1	3	0	0	0	0	0	51
d__Eukaryota	k__Fungi	p__Basidiomycota	c__Agaricomycetes	o__Thelephorales	f__Thelephoraceae	g__Tomentella	s__unclassified_g__Tomentella	OTU816	7	0	0	0	0	0	0	0	0	0	0	0	0	0	0	0	0	0	0	0	0	0	3	0	0	0	11	21
d__Eukaryota	k__Fungi	p__unclassified_k__Fungi	c__unclassified_k__Fungi	o__unclassified_k__Fungi	f__unclassified_k__Fungi	g__unclassified_k__Fungi	s__unclassified_k__Fungi	OTU627	0	130	57	0	0	0	0	0	0	0	0	0	0	0	0	0	0	0	33	14	0	14	0	0	2	0	0	250
d__Eukaryota	k__Fungi	p__unclassified_k__Fungi	c__unclassified_k__Fungi	o__unclassified_k__Fungi	f__unclassified_k__Fungi	g__unclassified_k__Fungi	s__unclassified_k__Fungi	OTU237	6	0	12	7	3	1	5	1	0	4	30	0	0	57	2	7	0	5	1	7	24	0	4	2	3	2	10	193
d__Eukaryota	k__Fungi	p__unclassified_k__Fungi	c__unclassified_k__Fungi	o__unclassified_k__Fungi	f__unclassified_k__Fungi	g__unclassified_k__Fungi	s__unclassified_k__Fungi	OTU238	0	0	19	0	4	28	0	0	10	0	0	0	0	0	1	0	0	1	70	0	6	15	9	0	0	7	0	170
d__Eukaryota	k__Fungi	p__unclassified_k__Fungi	c__unclassified_k__Fungi	o__unclassified_k__Fungi	f__unclassified_k__Fungi	g__unclassified_k__Fungi	s__unclassified_k__Fungi	OTU580	5	0	12	0	0	0	0	0	0	0	0	0	0	0	0	3	0	0	3	0	0	0	0	0	0	0	12	35
d__Eukaryota	k__Fungi	p__Ascomycota	c__Dothideomycetes	o__Pleosporales	f__Didymellaceae	g__Paraboeremia	s__unclassified_g__Paraboeremia	OTU393	139	163	49	0	1	0	37	0	0	0	1	3	4	9	12	0	0	10	2	0	2	12	14	3	35	11	16	523
d__Eukaryota	k__Fungi	p__Basidiomycota	c__Agaricomycetes	o__Agaricales	f__Clavariaceae	g__unclassified_f__Clavariaceae	s__unclassified_f__Clavariaceae	OTU863	6	0	0	0	0	0	0	0	0	0	0	0	0	0	0	14	69	0	0	0	0	0	0	11	0	0	10	110
d__Eukaryota	k__Fungi	p__Mortierellomycota	c__Mortierellomycetes	o__Mortierellales	f__Mortierellaceae	g__Mortierella	s__Mortierella_alpina	OTU97	17	48	25	5	8	2	3	6	10	12	43	5	1	48	13	7	12	15	2	14	4	4	13	24	3	39	8	391
d__Eukaryota	k__Fungi	p__unclassified_k__Fungi	c__unclassified_k__Fungi	o__unclassified_k__Fungi	f__unclassified_k__Fungi	g__unclassified_k__Fungi	s__unclassified_k__Fungi	OTU495	2	1	2	0	0	0	0	0	0	0	0	0	0	1	0	0	0	0	0	0	0	0	0	1	0	3	0	10
d__Eukaryota	k__Fungi	p__Ascomycota	c__Leotiomycetes	o__Helotiales	f__unclassified_o__Helotiales	g__unclassified_o__Helotiales	s__unclassified_o__Helotiales	OTU469	1	4	7	0	0	0	0	0	0	0	0	0	0	0	0	17	33	0	8	5	0	0	0	3	1	4	0	83
d__Eukaryota	k__Fungi	p__Ascomycota	c__Dothideomycetes	o__Pleosporales	f__Didymosphaeriaceae	g__Pseudopithomyces	s__Pseudopithomyces_chartarum	OTU1330	0	0	1	0	1	4	0	2	3	1	0	0	3	1	1	0	0	3	0	0	0	0	1	14	0	0	0	35
d__Eukaryota	k__Fungi	p__Rozellomycota	c__unclassified_p__Rozellomycota	o__unclassified_p__Rozellomycota	f__unclassified_p__Rozellomycota	g__unclassified_p__Rozellomycota	s__Rozellomycota_sp	OTU92	0	0	0	0	0	0	0	0	2	7	2	2	0	6	2	0	0	0	0	0	0	0	0	0	2	0	0	23
d__Eukaryota	k__Fungi	p__Basidiomycota	c__Agaricomycetes	o__Thelephorales	f__Thelephoraceae	g__Tomentella	s__Tomentella_stuposa	OTU1164	0	20	59	0	0	0	0	0	0	0	0	0	0	0	0	28	19	5	8	6	0	0	10	11	15	25	22	228
d__Eukaryota	k__Fungi	p__Rozellomycota	c__unclassified_p__Rozellomycota	o__unclassified_p__Rozellomycota	f__unclassified_p__Rozellomycota	g__unclassified_p__Rozellomycota	s__Rozellomycota_sp	OTU133	0	0	0	0	0	2	0	0	16	2	5	2	7	0	85	0	2	5	54	0	3	2	4	1	7	2	0	199
d__Eukaryota	k__Fungi	p__Ascomycota	c__Sordariomycetes	o__Hypocreales	f__Nectriaceae	g__Fusarium	s__Fusarium_delphinoides	OTU585	28	0	9	11	53	5	16	4	7	18	20	11	18	72	14	4	8	6	15	21	19	10	10	57	32	34	24	526
d__Eukaryota	k__Fungi	p__unclassified_k__Fungi	c__unclassified_k__Fungi	o__unclassified_k__Fungi	f__unclassified_k__Fungi	g__unclassified_k__Fungi	s__unclassified_k__Fungi	OTU1162	0	0	12	0	0	0	0	0	0	0	0	0	0	0	0	16	0	0	2	0	0	0	0	6	0	10	0	46
d__Eukaryota	k__Fungi	p__Ascomycota	c__Sordariomycetes	o__unclassified_c__Sordariomycetes	f__unclassified_c__Sordariomycetes	g__unclassified_c__Sordariomycetes	s__unclassified_c__Sordariomycetes	OTU660	17	0	4	6	2	4	3	4	1	7	5	4	3	0	17	1	20	17	0	41	6	10	49	6	5	13	17	262
d__Eukaryota	k__Fungi	p__Ascomycota	c__Sordariomycetes	o__Hypocreales	f__Nectriaceae	g__Dactylonectria	s__unclassified_g__Dactylonectria	OTU1103	7	4	0	1	1	0	0	0	0	0	0	0	0	0	1	0	0	1	0	0	3	0	1	3	8	0	25	55
d__Eukaryota	k__Fungi	p__Mortierellomycota	c__Mortierellomycetes	o__Mortierellales	f__Mortierellaceae	g__Mortierella	s__Mortierella_alpina	OTU1219	29	59	129	5	18	13	10	9	16	38	8	10	22	56	8	41	26	18	52	16	10	4	3	82	41	14	8	745
d__Eukaryota	k__Fungi	p__Ascomycota	c__Sordariomycetes	o__Glomerellales	f__Plectosphaerellaceae	g__Sodiomyces	s__unclassified_g__Sodiomyces	OTU199	7	18	13	13	9	6	6	1	11	8	7	2	11	7	3	1	0	17	0	16	8	1	31	16	7	55	17	291
d__Eukaryota	k__Fungi	p__unclassified_k__Fungi	c__unclassified_k__Fungi	o__unclassified_k__Fungi	f__unclassified_k__Fungi	g__unclassified_k__Fungi	s__unclassified_k__Fungi	OTU829	0	0	0	0	0	0	0	0	0	1	0	0	0	0	2	0	0	0	2	0	0	4	12	6	0	0	0	27
d__Eukaryota	k__Fungi	p__Basidiomycota	c__Microbotryomycetes	o__Sporidiobolales	f__Sporidiobolaceae	g__Sporidiobolus	s__Sporidiobolus_pararoseus	OTU1311	24	7	18	2	130	7	2	9	17	2	1	12	2	2	1	52	30	22	36	6	11	0	1	11	3	6	1	415
d__Eukaryota	k__Fungi	p__Basidiomycota	c__Agaricomycetes	o__Russulales	f__Russulaceae	g__Lactarius	s__Lactarius_lacunarum	OTU479	2	3	11	0	0	0	0	0	0	0	0	0	0	0	0	3	1	2	0	0	0	0	2	4	0	0	7	35
d__Eukaryota	k__Fungi	p__Basidiomycota	c__Agaricomycetes	o__unclassified_c__Agaricomycetes	f__unclassified_c__Agaricomycetes	g__unclassified_c__Agaricomycetes	s__unclassified_c__Agaricomycetes	OTU999	472	988	636	0	0	0	0	0	0	0	0	0	0	0	0	321	689	237	139	126	16	2	220	152	268	422	488	5176
d__Eukaryota	k__Fungi	p__Basidiomycota	c__Tremellomycetes	o__Tremellales	f__Bulleribasidiaceae	g__Hannaella	s__Hannaella_surugaensis	OTU864	0	0	0	0	0	0	1	0	0	0	0	0	0	0	0	8	10	0	0	9	0	2	0	4	0	0	0	34
d__Eukaryota	k__Fungi	p__unclassified_k__Fungi	c__unclassified_k__Fungi	o__unclassified_k__Fungi	f__unclassified_k__Fungi	g__unclassified_k__Fungi	s__unclassified_k__Fungi	OTU1095	0	0	0	7	6	6	0	0	0	0	0	2	0	0	4	0	0	4	2	12	23	12	0	0	0	0	20	98
d__Eukaryota	k__Fungi	p__Ascomycota	c__Sordariomycetes	o__unclassified_c__Sordariomycetes	f__unclassified_c__Sordariomycetes	g__unclassified_c__Sordariomycetes	s__unclassified_c__Sordariomycetes	OTU1196	2	3	2	0	0	0	0	0	0	0	0	0	0	0	0	23	15	0	0	0	0	0	0	0	1	3	0	49
d__Eukaryota	k__Fungi	p__Basidiomycota	c__Tremellomycetes	o__Tremellales	f__Tremellaceae	g__Cryptococcus_f__Tremellaceae	s__Cryptococcus_aureus	OTU417	110	400	16	14	11	25	1	19	7	1	0	15	10	5	146	20	18	5	24	27	8	1	22	23	9	10	69	1016
d__Eukaryota	k__Fungi	p__Ascomycota	c__Sordariomycetes	o__Hypocreales	f__Hypocreaceae	g__Trichoderma	s__unclassified_g__Trichoderma	OTU848	0	0	0	0	0	0	1	0	0	0	0	0	0	3	0	0	3	1	0	0	5	0	0	1	3	0	0	17
d__Eukaryota	k__Fungi	p__Ascomycota	c__Eurotiomycetes	o__Eurotiales	f__Aspergillaceae	g__Xeromyces	s__Xeromyces_bisporus	OTU165	0	0	0	0	0	8	2	5	1	2	1	5	5	0	7	0	0	0	0	0	1	0	0	0	0	0	0	37
															18361

## Sheet: OTU_Percent
Domain	Kingdom	Phylum	Class	Order	Family	Genus	Species	OTU	Before_1	Before_2	Before_3	N7D_1	N7D_2	N7D_3	N14D_1	N14D_2	N14D_3	N28D_1	N28D_2	N28D_3	N72D_1	N72D_2	N72D_3	S7D_1	S7D_2	S7D_3	S14D_1	S14D_2	S14D_3	S28D_1	S28D_2	S28D_3	S72D_1	S72D_2	S72D_3
d__Eukaryota	k__Fungi	p__Basidiomycota	c__Tremellomycetes	o__Tremellales	f__Cryptococcaceae	g__Cryptococcus_f__Cryptococcaceae	s__Cryptococcus_heimaeyensis	OTU340	0.0272316	0.80061	0	0	0	0	0	0	0	0	0	0	0	0	0	0	0	0	0.0108927	0.136158	0	0	0	0	0	0	0
d__Eukaryota	k__Fungi	p__Zoopagomycota	c__unclassified_p__Zoopagomycota	o__unclassified_p__Zoopagomycota	f__unclassified_p__Zoopagomycota	g__unclassified_p__Zoopagomycota	s__Zoopagomycota_sp	OTU941	0	0	0	0	0.00544633	0	0	0.00544633	0.0108927	0.00544633	0.0108927	0.016339	0	0.0490169	0.0108927	0	0	0	0	0	0	0.0108927	0	0	0.00544633	0.0544633	0
d__Eukaryota	k__Fungi	p__Ascomycota	c__unclassified_p__Ascomycota	o__unclassified_p__Ascomycota	f__unclassified_p__Ascomycota	g__unclassified_p__Ascomycota	s__unclassified_p__Ascomycota	OTU844	0.0108927	0.136158	0.0381243	0	0	0	0.0708022	0.0544633	0.0708022	0.0490169	0.0490169	0.0653559	0.0816949	0.223299	0.272316	0	0.16339	0.0217853	0.016339	0.0272316	0.0272316	0.0544633	0.272316	0.0816949	0.0490169	0.0816949	0.130712
d__Eukaryota	k__Fungi	p__Basidiomycota	c__Tremellomycetes	o__Cystofilobasidiales	f__Mrakiaceae	g__Mrakia	s__Mrakia_blollopis	OTU1182	0.0544633	0.179729	0.0272316	0.0108927	0.032678	0.0435706	0.032678	0.016339	0.0217853	0.0490169	0.00544633	0.00544633	0.0381243	0.0490169	0.0272316	0.223299	0.718915	0.108927	0.0708022	0.147051	0.136158	0	0	0.0871412	0.00544633	0.0925875	0.0217853
d__Eukaryota	k__Fungi	p__Zoopagomycota	c__Zoopagomycetes	o__Zoopagales	f__Zoopagaceae	g__Acaulopage	s__Acaulopage_sp	OTU766	0	0	0.0653559	0	0	0	0	0	0	0	0	0	0	0	0	0	0.0653559	0.10348	0	0	0	0.0217853	0.0980339	0	0	0	0.299548
d__Eukaryota	k__Fungi	p__unclassified_k__Fungi	c__unclassified_k__Fungi	o__unclassified_k__Fungi	f__unclassified_k__Fungi	g__unclassified_k__Fungi	s__unclassified_k__Fungi	OTU93	0	0	0.0217853	0	0	0	0.00544633	0	0.283209	0.016339	0	0	0	0	0	0	0	0.0108927	0	0	0.00544633	0	0	0.032678	0	0	0
d__Eukaryota	k__Fungi	p__Basidiomycota	c__Tremellomycetes	o__Holtermanniales	f__Holtermanniales_fam_Incertae_sedis	g__Holtermanniella	s__Holtermanniella_sp	OTU467	0.00544633	0.0762486	0	0	0.016339	0.00544633	0	0	0.00544633	0	0	0	0	0	0	0	0.0762486	0.0217853	0.0108927	0.0381243	0.0108927	0	0.016339	0.016339	0.00544633	0.0435706	0.0217853
d__Eukaryota	k__Fungi	p__Ascomycota	c__Leotiomycetes	o__Helotiales	f__unclassified_o__Helotiales	g__unclassified_o__Helotiales	s__unclassified_o__Helotiales	OTU407	0	0.00544633	0	0	0	0	0	0	0	0	0	0	0	0	0	0.0925875	0.0217853	0.0108927	0	0	0	0	0	0	0	0.00544633	0
d__Eukaryota	k__Fungi	p__unclassified_k__Fungi	c__unclassified_k__Fungi	o__unclassified_k__Fungi	f__unclassified_k__Fungi	g__unclassified_k__Fungi	s__unclassified_k__Fungi	OTU959	0.0217853	0	0	0	0.0217853	0	0.0490169	0.00544633	0	0.00544633	0.0272316	0	0.0272316	0	0.185175	0.032678	0	0	0.0925875	0	0	0.00544633	0	0.0272316	0.53374	0	0
d__Eukaryota	k__Fungi	p__Basidiomycota	c__Wallemiomycetes	o__Wallemiales	f__Wallemiaceae	g__Wallemia	s__unclassified_g__Wallemia	OTU707	0.0544633	0.00544633	0.0599096	0.0217853	0.0108927	0.386689	0.0544633	0.114373	0.0925875	0.0435706	0.304994	0.0653559	0.0544633	0.10348	0.0544633	2.14585	1.26899	2.42362	1.20908	0.457491	0.806056	0.359458	2.54343	0.479277	0.283209	0.239638	0.10348
d__Eukaryota	k__Fungi	p__Basidiomycota	c__Tremellomycetes	o__Trichosporonales	f__Trichosporonaceae	g__Trichosporon	s__unclassified_g__Trichosporon	OTU1267	0.0762486	0.0816949	0.174282	0.10348	0.032678	0.0108927	0	0.032678	0	0.0217853	0.0108927	0	0.0108927	0	0.016339	0.0435706	0.0653559	0.016339	0.0108927	0.0108927	0.00544633	0.0108927	0.016339	0.0108927	0.016339	0.0108927	0.152497
d__Eukaryota	k__Fungi	p__Ascomycota	c__Eurotiomycetes	o__Eurotiales	f__Aspergillaceae	g__Aspergillus	s__Aspergillus_minisclerotigenes	OTU976	0	0	0	0	0	0	0	0.00544633	0	0	0	0	0	0.00544633	0	0.0435706	0	0	0	0.00544633	0	0	0	0	0.0217853	0.0108927	0.0217853
d__Eukaryota	k__Fungi	p__Ascomycota	c__Dothideomycetes	o__Pleosporales	f__Didymellaceae	g__unclassified_f__Didymellaceae	s__unclassified_f__Didymellaceae	OTU846	0	0.0272316	0.00544633	0.0108927	0	0.00544633	0	0	0	0	0	0.0108927	0	0	0	0	0.032678	0	0.0108927	0.0272316	0	0.0108927	0.0980339	0	0.0217853	0.0544633	0.0544633
d__Eukaryota	k__Fungi	p__Basidiomycota	c__Tremellomycetes	o__Filobasidiales	f__Filobasidiaceae	g__Naganishia	s__Naganishia_sp	OTU576	0	0	0	0	0	0.00544633	0	0	0	0	0	0	0	0	0	0	0	0.0108927	0.032678	0	0	0	0	0	0.016339	0	0
d__Eukaryota	k__Fungi	p__Basidiomycota	c__Malasseziomycetes	o__Malasseziales	f__unclassified_o__Malasseziales	g__unclassified_o__Malasseziales	s__Malasseziales_sp	OTU574	0	0	0.016339	0.0108927	0	0	0	0	0	0.00544633	0	0.0108927	0	0	0	0	0	0	0.00544633	0.0272316	0	0	0	0	0	0	0.016339
d__Eukaryota	k__Fungi	p__Basidiomycota	c__Tremellomycetes	o__Trichosporonales	f__Trichosporonaceae	g__Cutaneotrichosporon	s__Cutaneotrichosporon_curvatus	OTU453	0.446599	0.626328	0.392136	0.174282	0.130712	0.0381243	0.016339	0.185175	0.125266	0.00544633	0.0925875	0	0.00544633	0.16339	0.032678	0.310441	0.288655	0.255977	0.10348	0.462938	0.0544633	0.37035	0.212407	0.179729	0.147051	0.272316	0.250531
d__Eukaryota	k__Fungi	p__Ascomycota	c__Leotiomycetes	o__Helotiales	f__unclassified_o__Helotiales	g__unclassified_o__Helotiales	s__unclassified_o__Helotiales	OTU664	0.511955	1.5522	0.708022	0	0	0	0	0	0	0	0	0	0	0	0	0.348565	1.66113	0.228746	0.381243	0.876859	0.016339	0.00544633	0.16339	0.212407	0.348565	0.659006	0.245085
d__Eukaryota	k__Fungi	p__Ascomycota	c__Eurotiomycetes	o__Eurotiales	f__Aspergillaceae	g__Penicillium	s__Penicillium_digitatum	OTU125	0.00544633	0	0	0	0	0	0	0	0	0	0.00544633	0.00544633	0	0	0	0	0.00544633	0	0	0.0108927	0	0.00544633	0	0	0	0.032678	0
d__Eukaryota	k__Fungi	p__Mortierellomycota	c__Mortierellomycetes	o__Mortierellales	f__Mortierellaceae	g__Mortierella	s__Mortierella_ambigua	OTU427	0.0108927	0.016339	0.0653559	0.0108927	0.016339	0.0272316	0.0108927	0	0.0217853	0	0.0708022	0.0108927	0.0217853	0.016339	0.00544633	0	0	0	0.00544633	0	0.0108927	0.0381243	0.0599096	0	0.0544633	0.0653559	0
d__Eukaryota	k__Fungi	p__Ascomycota	c__Sordariomycetes	o__Hypocreales	f__Hypocreales_fam_Incertae_sedis	g__Chlamydocillium	s__Chlamydocillium_sp	OTU195	0.397582	0.653559	0.196068	0.0816949	0.228746	0.201514	0.136158	0.174282	0.26687	0.196068	0.762486	0.462938	0.539186	1.1165	0.560972	0.0762486	0.288655	0.288655	0.0980339	0.408474	0.228746	0.255977	0.446599	0.490169	1.37247	0.315887	0.179729
d__Eukaryota	k__Fungi	p__Basidiomycota	c__Tremellomycetes	o__Trichosporonales	f__Trichosporonaceae	g__Cutaneotrichosporon	s__Cutaneotrichosporon_sp	OTU1247	0	0	0	0	0	0	0	0	0	0	0	0	0	0	0	0	0.0925875	0.0217853	0.016339	0.0435706	0	0	0	0.0272316	0.0762486	0	0.152497
d__Eukaryota	k__Fungi	p__Ascomycota	c__Eurotiomycetes	o__Eurotiales	f__Aspergillaceae	g__Aspergillus	s__unclassified_g__Aspergillus	OTU193	0	0	0	0	0	0.00544633	0	0.0108927	0	0.00544633	0	0	0.00544633	0.0108927	0.00544633	0.0217853	0	0.0108927	0.00544633	0.0381243	0.00544633	0.0272316	0	0.0108927	0.0217853	0	0
d__Eukaryota	k__Fungi	p__Ascomycota	c__Leotiomycetes	o__Helotiales	f__Sclerotiniaceae	g__Sclerotinia	s__unclassified_g__Sclerotinia	OTU385	1.32346	0.250531	0.321333	0	0.016339	0.00544633	0.032678	0.032678	0.0980339	0.0762486	0.0599096	0.108927	0.0871412	0.245085	0.0762486	0.0708022	0.550079	0.0762486	0.0108927	0.7407	0.0381243	0.0490169	0.032678	0.20696	0.130712	0.185175	0.0653559
d__Eukaryota	k__Fungi	p__unclassified_k__Fungi	c__unclassified_k__Fungi	o__unclassified_k__Fungi	f__unclassified_k__Fungi	g__unclassified_k__Fungi	s__unclassified_k__Fungi	OTU372	0.0381243	0	0	0	0	0	0	0	0	0	0	0	0	0	0	0.0490169	0	0	0	0.0435706	0	0	0	0	0.0490169	0.0544633	0
d__Eukaryota	k__Fungi	p__unclassified_k__Fungi	c__unclassified_k__Fungi	o__unclassified_k__Fungi	f__unclassified_k__Fungi	g__unclassified_k__Fungi	s__unclassified_k__Fungi	OTU279	0	0	0	0.217853	0.179729	0.0816949	0.130712	1.68836	0	0.0217853	0.16339	0.0272316	0.10348	0.00544633	0.0108927	0	0	0.0272316	0	0.0108927	0.0490169	0.016339	0.130712	0.190621	0.016339	0.277763	0.016339
d__Eukaryota	k__Fungi	p__Zoopagomycota	c__Zoopagomycetes	o__Zoopagales	f__Zoopagaceae	g__Acaulopage	s__Acaulopage_sp	OTU746	0	0	0	0	0.0108927	0.032678	0.0381243	0.0217853	0.0490169	0.577311	0.185175	0.0653559	0.0272316	0	0.0816949	0.00544633	0	0	0.032678	0.00544633	0.0816949	0.108927	0.452045	0.0490169	0.0816949	0.0490169	0.0816949
d__Eukaryota	k__Fungi	p__unclassified_k__Fungi	c__unclassified_k__Fungi	o__unclassified_k__Fungi	f__unclassified_k__Fungi	g__unclassified_k__Fungi	s__unclassified_k__Fungi	OTU789	0	0	0	0	0	0	0	0	0.0435706	0	0	0	0.00544633	0.0816949	0.0599096	0	0	0	0	0	0.0108927	0.0217853	0	0	0	0.0272316	0
d__Eukaryota	k__Fungi	p__Ascomycota	c__unclassified_p__Ascomycota	o__unclassified_p__Ascomycota	f__unclassified_p__Ascomycota	g__unclassified_p__Ascomycota	s__unclassified_p__Ascomycota	OTU400	0	0.0871412	0.00544633	0	0	0	0	0	0	0	0	0	0	0	0	0	0	0	0	0	0.00544633	0	0	0.0217853	0.016339	0.0272316	0.0490169
d__Eukaryota	k__Fungi	p__Ascomycota	c__unclassified_p__Ascomycota	o__unclassified_p__Ascomycota	f__unclassified_p__Ascomycota	g__unclassified_p__Ascomycota	s__unclassified_p__Ascomycota	OTU402	0	0.157943	0.0435706	0	0	0	0	0	0	0	0	0	0	0	0	0.0544633	0	0	0.0108927	0	0	0	0.125266	0	0.179729	0.136158	0
d__Eukaryota	k__Fungi	p__Basidiomycota	c__Tremellomycetes	o__Tremellales	f__unclassified_o__Tremellales	g__unclassified_o__Tremellales	s__unclassified_o__Tremellales	OTU595	0.10348	0.130712	0.185175	0.0108927	0.0108927	0.016339	0.016339	0	0	0	0	0	0	0	0	0.032678	0.212407	0	0.217853	0.0762486	0	0	0	0	0.032678	0	0
d__Eukaryota	k__Fungi	p__unclassified_k__Fungi	c__unclassified_k__Fungi	o__unclassified_k__Fungi	f__unclassified_k__Fungi	g__unclassified_k__Fungi	s__unclassified_k__Fungi	OTU753	0	0	0	0	0	0	0	0	0.0708022	0	0	0	0	0	0	0	0	0	0	0	0	0.10348	0	0	0.0217853	0	0
d__Eukaryota	k__Fungi	p__unclassified_k__Fungi	c__unclassified_k__Fungi	o__unclassified_k__Fungi	f__unclassified_k__Fungi	g__unclassified_k__Fungi	s__unclassified_k__Fungi	OTU870	0	0	0	0	0	0	0	0	0	0	0	0	0	0	0	0.0490169	0.10348	0.0435706	0	0	0	0	0	0.0272316	0	0	0
d__Eukaryota	k__Fungi	p__unclassified_k__Fungi	c__unclassified_k__Fungi	o__unclassified_k__Fungi	f__unclassified_k__Fungi	g__unclassified_k__Fungi	s__unclassified_k__Fungi	OTU652	0.0381243	0	0	0	0	0	0	0	0	0	0	0	0	0	0	0.0435706	0.348565	0	0	0.0381243	0.0544633	0.032678	0.20696	0	0.0490169	0.0272316	0.381243
d__Eukaryota	k__Fungi	p__Basidiomycota	c__Microbotryomycetes	o__Leucosporidiales	f__Leucosporidiaceae	g__Leucosporidium	s__Leucosporidium_intermedium	OTU263	0	0	0	0.0108927	0.0108927	0.016339	0.00544633	0.00544633	0.0272316	0	0.0217853	0.0272316	0.675344	0.0871412	19.0894	0.0490169	0.0762486	0.032678	0.0816949	0	0.0108927	0.0217853	0.201514	0.0217853	0.501062	0.490169	0.0435706
d__Eukaryota	k__Fungi	p__Ascomycota	c__Eurotiomycetes	o__Eurotiales	f__Aspergillaceae	g__Penicillium	s__unclassified_g__Penicillium	OTU380	0.0108927	0	0.032678	0	0	0.032678	0.0653559	0	0.0217853	0.0217853	0	0	0.0272316	0.0381243	0.00544633	0.0272316	0.0435706	0	0.0108927	0.016339	1.29623	0.00544633	0	0.0272316	0.0708022	0	0
d__Eukaryota	k__Fungi	p__Ascomycota	c__Sordariomycetes	o__Sordariales	f__Lasiosphaeriaceae	g__Arnium	s__Arnium_sp	OTU974	2.03148	3.23512	2.0696	0	0	0	0	0	0	0	0	0	0	0	0	0.882305	4.87446	0.615435	0.724361	1.65568	0.10348	0.304994	1.69381	0.484723	1.44328	1.59577	2.71772
d__Eukaryota	k__Fungi	p__Ascomycota	c__Dothideomycetes	o__Pleosporales	f__Pleosporaceae	g__Stemphylium	s__Stemphylium_lycopersici	OTU63	0.560972	0.272316	0.441152	1.24176	0.10348	0.468384	0.528294	0.332226	2.48352	0.511955	0.108927	0.255977	0.424813	0	0.00544633	0.217853	0.223299	0.413921	0.239638	0.272316	0.479277	0.0435706	0.272316	1.7755	0.0217853	0.37035	0.43026
d__Eukaryota	k__Fungi	p__Basidiomycota	c__Tremellomycetes	o__Cystofilobasidiales	f__unclassified_o__Cystofilobasidiales	g__unclassified_o__Cystofilobasidiales	s__unclassified_o__Cystofilobasidiales	OTU440	0	0.032678	0	0	0	0	0	0	0	0	0	0	0	0	0	0.0108927	0.0272316	0	0	0	0	0	0	0	0	0	0
d__Eukaryota	k__Fungi	p__unclassified_k__Fungi	c__unclassified_k__Fungi	o__unclassified_k__Fungi	f__unclassified_k__Fungi	g__unclassified_k__Fungi	s__unclassified_k__Fungi	OTU392	0	0.136158	0	0	0	0	0.0108927	0	0	0.00544633	0.0762486	0.016339	0.0108927	0	0.0108927	0	0	0.00544633	0	0.0217853	0.00544633	0	0.016339	0.0381243	0	0.0272316	0.0108927
d__Eukaryota	k__Fungi	p__Mortierellomycota	c__Mortierellomycetes	o__Mortierellales	f__Mortierellaceae	g__Mortierella	s__Mortierella_indohii	OTU31	0.947661	1.10016	1.53586	0.795164	0.00544633	0.0217853	0.114373	0.00544633	0.00544633	0.441152	0	0.0108927	0.288655	0	0.0108927	0	0.00544633	0.108927	0.0108927	0.130712	0.032678	0.114373	0.0272316	0.849627	0.0108927	0.185175	0.0762486
d__Eukaryota	k__Fungi	p__unclassified_k__Fungi	c__unclassified_k__Fungi	o__unclassified_k__Fungi	f__unclassified_k__Fungi	g__unclassified_k__Fungi	s__unclassified_k__Fungi	OTU396	0.032678	0.223299	0	0.00544633	0.0272316	0.00544633	0.00544633	0	0.0816949	0.016339	0.0762486	0.032678	0	0.0653559	0.0708022	0.0217853	0	0.0108927	0	0.0925875	0.0108927	0	0.0272316	0.953107	0.00544633	0.00544633	0.157943
d__Eukaryota	k__Fungi	p__unclassified_k__Fungi	c__unclassified_k__Fungi	o__unclassified_k__Fungi	f__unclassified_k__Fungi	g__unclassified_k__Fungi	s__unclassified_k__Fungi	OTU768	0	0	0	0.00544633	0.032678	0.201514	0.0217853	0.0490169	0.0217853	0.00544633	0	0.0272316	0	0.0653559	0.261424	0	0	0.00544633	0.0544633	0.00544633	0.0108927	1.07837	0	0	0.016339	0.0490169	0
d__Eukaryota	k__Fungi	p__Basidiomycota	c__Agaricomycetes	o__Tremellodendropsidales	f__unclassified_o__Tremellodendropsidales	g__unclassified_o__Tremellodendropsidales	s__Tremellodendropsidales_sp	OTU338	0.0653559	0.408474	0.272316	0	0	0	0	0	0	0	0	0	0	0	0	0.0871412	0.0925875	0.0490169	0.0217853	0.0272316	0.0108927	0.00544633	0.0925875	0.0108927	0	0.0381243	0.032678
d__Eukaryota	k__Fungi	p__unclassified_k__Fungi	c__unclassified_k__Fungi	o__unclassified_k__Fungi	f__unclassified_k__Fungi	g__unclassified_k__Fungi	s__unclassified_k__Fungi	OTU822	0	0	0	0	0	0	0	0	0	0	0	0	0	0	0	0.0490169	0	0	0	0	0	0	0.0435706	0	0	0	0.0925875
d__Eukaryota	k__Fungi	p__Ascomycota	c__Sordariomycetes	o__Glomerellales	f__Plectosphaerellaceae	g__Gibellulopsis	s__Gibellulopsis_nigrescens	OTU112	24.4758	6.30685	15.9904	8.59975	12.3577	40.744	6.34497	31.6105	38.1515	7.21638	49.9265	16.1865	14.4437	17.6025	9.35679	14.2803	9.04635	18.4195	11.1759	37.8792	11.4264	8.61064	21.7744	17.8313	8.86662	16.4697	21.3442
d__Eukaryota	k__Fungi	p__Ascomycota	c__Dothideomycetes	o__Pleosporales	f__Melanommataceae	g__Pleotrichocladium	s__Pleotrichocladium_opacum	OTU458	0	0.0599096	0.10348	0	0	0	0	0	0	0	0	0	0	0	0	0.0490169	0	0	0.00544633	0	0	0	0	0	0	0.0217853	0
d__Eukaryota	k__Fungi	p__Ascomycota	c__Eurotiomycetes	o__Onygenales	f__unclassified_o__Onygenales	g__unclassified_o__Onygenales	s__unclassified_o__Onygenales	OTU708	0.0108927	0.0435706	0	0	0	0	0	0	0.00544633	0	0	0.00544633	0.00544633	0	0	0	0.0272316	0	0	0.00544633	0	0	0	0.00544633	0.0381243	0	0
d__Eukaryota	k__Fungi	p__unclassified_k__Fungi	c__unclassified_k__Fungi	o__unclassified_k__Fungi	f__unclassified_k__Fungi	g__unclassified_k__Fungi	s__unclassified_k__Fungi	OTU757	0	0	0	0.125266	0	0	0.0381243	0	0	0	0	0	0.0708022	0	0	0	0	0	0	0	0	0.299548	0	0	0.168836	0	0
d__Eukaryota	k__Fungi	p__Ascomycota	c__Eurotiomycetes	o__Eurotiales	f__Trichocomaceae	g__Talaromyces	s__Talaromyces_liani	OTU350	0.0217853	0	0.0272316	0	0	0	0	0	0	0	0	0	0.00544633	0	0	0.0653559	0.0871412	0.00544633	0.0108927	0.0708022	0	0	0	0	0	0.032678	0.0108927
d__Eukaryota	k__Fungi	p__Ascomycota	c__Sordariomycetes	o__Microascales	f__Microascaceae	g__Lophotrichus	s__Lophotrichus_plumbescens	OTU502	0.0217853	0.016339	0.0762486	0	0.0108927	0.0108927	0.00544633	0.00544633	0.0272316	0.108927	0.0217853	0	0.0544633	0.0217853	0.0272316	0	0	0.016339	0	0.0272316	0.0272316	0.016339	0.00544633	0.0599096	0.0653559	0.016339	0
d__Eukaryota	k__Fungi	p__Ascomycota	c__Dothideomycetes	o__Pleosporales	f__Didymellaceae	g__Didymella	s__Didymella_heteroderae	OTU398	0.10348	0.130712	0.032678	0	0	0	0	0	0	0.00544633	0	0	0	0	0	0.168836	0	0.0871412	0.0108927	0	0.0108927	0.0108927	0	0.0490169	0.0490169	0.250531	0
d__Eukaryota	k__Fungi	p__unclassified_k__Fungi	c__unclassified_k__Fungi	o__unclassified_k__Fungi	f__unclassified_k__Fungi	g__unclassified_k__Fungi	s__unclassified_k__Fungi	OTU914	0	0	0	0	0	0	0	0.0272316	0.00544633	0	0	0.0108927	0	0	0	0	0	0	0.0108927	0.0108927	0	0.00544633	0.0381243	0	0.0381243	0.0490169	0
d__Eukaryota	k__Fungi	p__Ascomycota	c__Leotiomycetes	o__Helotiales	f__Helotiales_fam_Incertae_sedis	g__Acidomelania	s__Acidomelania_panicicola	OTU1253	0.114373	0.108927	0.190621	0	0	0	0	0	0	0	0	0	0	0	0	0.10348	0.588203	0.0381243	0.016339	0.16339	0.00544633	0	0.0653559	0.0272316	0.0381243	0.0708022	0.141604
d__Eukaryota	k__Fungi	p__Basidiomycota	c__Agaricomycetes	o__Russulales	f__Russulaceae	g__Russula	s__unclassified_g__Russula	OTU817	0	0.272316	0.0108927	0	0	0	0	0	0	0	0	0	0	0	0	0.0708022	0.136158	0.0381243	0.00544633	0	0	0	0.0653559	0	0	0.157943	0.0925875
d__Eukaryota	k__Fungi	p__Ascomycota	c__Sordariomycetes	o__Chaetosphaeriales	f__Chaetosphaeriaceae	g__Gonytrichum	s__Gonytrichum_macrocladum_var._terricola	OTU450	0.0653559	0.0762486	0.0544633	0	0	0	0	0	0	0	0	0	0	0	0	0	0.141604	0.0108927	0	0.032678	0	0	0.00544633	0.0272316	0.0599096	0.0272316	0
d__Eukaryota	k__Fungi	p__Ascomycota	c__Eurotiomycetes	o__Eurotiales	f__Aspergillaceae	g__Aspergillus	s__Aspergillus_amstelodami	OTU422	0.0435706	0.20696	0.130712	0.0272316	0.00544633	0	0.00544633	0.00544633	0	0.016339	0.0108927	0.0381243	0.032678	0	0.0217853	0.10348	0.0816949	0.00544633	0.0435706	0.032678	0.0599096	0.0108927	0.0490169	0	0.0599096	0.0925875	0.130712
d__Eukaryota	k__Fungi	p__Ascomycota	c__Sordariomycetes	o__Glomerellales	f__Plectosphaerellaceae	g__unclassified_f__Plectosphaerellaceae	s__unclassified_f__Plectosphaerellaceae	OTU686	0.016339	0.00544633	0.00544633	0.299548	0.729808	1.1056	0.457491	0.909537	0.53374	0.136158	0.53374	0.20696	0.484723	0.114373	0.10348	0.0653559	0.00544633	0.196068	0.10348	0.0490169	0.364904	0.0599096	0.0816949	0.174282	0.0816949	0.0272316	0.0490169
d__Eukaryota	k__Fungi	p__unclassified_k__Fungi	c__unclassified_k__Fungi	o__unclassified_k__Fungi	f__unclassified_k__Fungi	g__unclassified_k__Fungi	s__unclassified_k__Fungi	OTU990	0	0	0	0	0.032678	0	0	0	0.016339	0	0.00544633	0	0	0	0.032678	0	0	0	0	0	0	0	0	0	0	0	0
d__Eukaryota	k__Fungi	p__Ascomycota	c__Orbiliomycetes	o__Orbiliales	f__Orbiliales_fam_Incertae_sedis	g__Vermispora	s__Vermispora_spermatophaga	OTU1004	0.0108927	0	0.00544633	0	0	0	0	0	0.00544633	0.0108927	0	0	0	0	0	0	0	0	0	0	0	0	0	0.0217853	0	0.0762486	0
d__Eukaryota	k__Fungi	p__Basidiomycota	c__Ustilaginomycetes	o__Ustilaginales	f__Ustilaginaceae	g__Moesziomyces	s__Moesziomyces_sp	OTU5	0.283209	0.016339	0.375797	0	0	0.0381243	0.0108927	0.0544633	0.0272316	0.0217853	0.0108927	0.016339	0.0980339	0.0217853	0.00544633	0.10348	0.0108927	0.0108927	0.00544633	0	0.310441	0	0	0.0381243	0.00544633	0.0435706	0
d__Eukaryota	k__Fungi	p__unclassified_k__Fungi	c__unclassified_k__Fungi	o__unclassified_k__Fungi	f__unclassified_k__Fungi	g__unclassified_k__Fungi	s__unclassified_k__Fungi	OTU336	2.99548	0	0.648113	0.245085	0	0.0272316	0.609989	0	0	0	0	0	0.348565	0	0.0217853	0.0272316	0.00544633	0.571864	0	0	3.35494	0.20696	0	0.119819	0	0	0.00544633
d__Eukaryota	k__Fungi	p__Ascomycota	c__Sordariomycetes	o__Hypocreales	f__Nectriaceae	g__Fusarium	s__unclassified_g__Fusarium	OTU186	3.82332	3.7035	3.81243	0.397582	2.74495	3.65449	3.98671	1.39971	2.76129	3.51833	2.03148	1.26899	5.90926	2.74495	1.62845	1.43238	3.54556	3.88323	2.01514	2.95191	3.19699	2.11317	1.62845	6.93862	6.72077	3.29503	1.94978
d__Eukaryota	k__Fungi	p__unclassified_k__Fungi	c__unclassified_k__Fungi	o__unclassified_k__Fungi	f__unclassified_k__Fungi	g__unclassified_k__Fungi	s__unclassified_k__Fungi	OTU1130	0.435706	0	0	0.0653559	0	0	0	0	0.0108927	0	0	0	0	0	0.141604	0	0.152497	0.468384	0	0	0.0708022	0	0	0	0	0	1.87898
d__Eukaryota	k__Fungi	p__Basidiomycota	c__Tremellomycetes	o__Cystofilobasidiales	f__Cystofilobasidiaceae	g__Cystofilobasidium	s__Cystofilobasidium_macerans	OTU252	0	0.0544633	0.032678	0.00544633	0.0217853	0	0.00544633	0.00544633	0.00544633	0	0	0	0.0217853	0	0.708022	0	0.0490169	0	0	0	0	0.00544633	0.00544633	0.0272316	0.114373	0.157943	0.0435706
d__Eukaryota	k__Fungi	p__unclassified_k__Fungi	c__unclassified_k__Fungi	o__unclassified_k__Fungi	f__unclassified_k__Fungi	g__unclassified_k__Fungi	s__unclassified_k__Fungi	OTU962	0.0217853	0	0.0490169	0	0	0	0	0	0	0	0	0	0	0.0108927	0	0	0	0	0.0653559	0	0	0	0	0	0.0435706	0	0.00544633
d__Eukaryota	k__Fungi	p__Chytridiomycota	c__unclassified_p__Chytridiomycota	o__unclassified_p__Chytridiomycota	f__unclassified_p__Chytridiomycota	g__unclassified_p__Chytridiomycota	s__unclassified_p__Chytridiomycota	OTU678	0.157943	0.0381243	0	0	0	0	0.0108927	0	0	0	0	0.00544633	0	0.0381243	0.0272316	0.00544633	0.0108927	0	0.00544633	0.00544633	0.0980339	0	0	0.0490169	0	0.0762486	0
d__Eukaryota	k__Fungi	p__Basidiomycota	c__unclassified_p__Basidiomycota	o__unclassified_p__Basidiomycota	f__unclassified_p__Basidiomycota	g__unclassified_p__Basidiomycota	s__unclassified_p__Basidiomycota	OTU1075	0.0108927	0	0	0	0	0	0	0	0	0	0	0	0	0.00544633	0	0	0.196068	0.016339	0	0	0.00544633	0	0	0	0	0	0.0599096
d__Eukaryota	k__Fungi	p__Ascomycota	c__Sordariomycetes	o__Hypocreales	f__Hypocreales_fam_Incertae_sedis	g__Emericellopsis	s__unclassified_g__Emericellopsis	OTU546	0.00544633	0.016339	0.0381243	0	0	0.0108927	0.016339	0	0	0.0108927	0	0.00544633	0.032678	0.00544633	0.0108927	0	0	0.0435706	0.0108927	0.0272316	0.392136	0.0490169	0.0217853	0.108927	0.26687	0	0.016339
d__Eukaryota	k__Fungi	p__Rozellomycota	c__unclassified_p__Rozellomycota	o__unclassified_p__Rozellomycota	f__unclassified_p__Rozellomycota	g__unclassified_p__Rozellomycota	s__Rozellomycota_sp	OTU963	0	0	0	0.00544633	0	0	0.00544633	0.0108927	0	0	0	0	0.0272316	0	0	0.00544633	0	0	0.114373	0	0.00544633	0	0	0	0.00544633	0	0
d__Eukaryota	k__Fungi	p__Rozellomycota	c__unclassified_p__Rozellomycota	o__unclassified_p__Rozellomycota	f__unclassified_p__Rozellomycota	g__unclassified_p__Rozellomycota	s__Rozellomycota_sp	OTU13	0	0	0	0	0	0	0.0708022	0	0	0	0.0272316	0	0	0	0.032678	0	0	0.0108927	0	0	0	0	0	0	0	0	0
d__Eukaryota	k__Fungi	p__unclassified_k__Fungi	c__unclassified_k__Fungi	o__unclassified_k__Fungi	f__unclassified_k__Fungi	g__unclassified_k__Fungi	s__unclassified_k__Fungi	OTU137	0	0	0	0.016339	0	0	0.0653559	0	0	0.0816949	0.0272316	0.00544633	0.016339	0	0	0	0	0	0.00544633	0	0.0708022	0.00544633	0.0108927	0.0381243	0	0	0
d__Eukaryota	k__Fungi	p__Ascomycota	c__Sordariomycetes	o__Microascales	f__Microascaceae	g__Microascus	s__Microascus_brevicaulis	OTU715	0	0.00544633	0	0	0	0	0.00544633	0	0.00544633	0.00544633	0	0	0.016339	0	0.00544633	0	0	0	0	0	0.0217853	0	0	0.00544633	0.0381243	0.00544633	0.00544633
d__Eukaryota	k__Fungi	p__Glomeromycota	c__Glomeromycetes	o__Diversisporales	f__Diversisporales_fam_Incertae_sedis	g__Entrophospora	s__Entrophospora_infrequens	OTU429	0.147051	0.26687	0.0762486	0	0	0	0	0	0	0	0	0	0	0	0	0.0435706	0	0	0	0.108927	0	0	0.0871412	0	0	0	0
d__Eukaryota	k__Fungi	p__Basidiomycota	c__Exobasidiomycetes	o__Golubeviales	f__Golubeviaceae	g__Golubevia	s__Golubevia_sp	OTU1154	0.114373	0.032678	0.359458	0.0217853	0.0272316	0.00544633	0	0.0217853	0.0217853	0	0	0.00544633	0	0.00544633	0.0272316	0.310441	0.016339	0.0108927	0.0108927	0.00544633	0.174282	0.0108927	0	0.00544633	0.0108927	0.0108927	0
d__Eukaryota	k__Fungi	p__Ascomycota	c__Sordariomycetes	o__Sordariales	f__Lasiosphaeriaceae	g__Podospora	s__Podospora_ellisiana	OTU489	0	0.0599096	0.152497	0	0	0	0	0	0	0	0	0	0	0	0	0	0.10348	0.0381243	0.0435706	0.0381243	0	0	0.0108927	0.0435706	0	0.0272316	0
d__Eukaryota	k__Fungi	p__unclassified_k__Fungi	c__unclassified_k__Fungi	o__unclassified_k__Fungi	f__unclassified_k__Fungi	g__unclassified_k__Fungi	s__unclassified_k__Fungi	OTU1266	0	0	0	0	0	0	0.016339	0	0	0	0	0	0.00544633	0	0.0762486	0	0.0490169	0	0.0108927	0	0.00544633	0.0108927	0	0	0.0381243	0	0
d__Eukaryota	k__Fungi	p__Ascomycota	c__Sordariomycetes	o__Glomerellales	f__Plectosphaerellaceae	g__Plectosphaerella	s__unclassified_g__Plectosphaerella	OTU782	5.52258	1.93345	3.31681	30.2925	66.7774	29.5136	57.023	34.8293	15.5384	7.67387	9.89053	9.22608	25.93	4.49322	5.71864	44.0826	21.8452	35.9022	16.1048	9.55286	38.9194	12.1399	9.40581	20.2059	7.45602	6.11078	6.56827
d__Eukaryota	k__Fungi	p__Chytridiomycota	c__GS13	o__unclassified_c__GS13	f__unclassified_c__GS13	g__unclassified_c__GS13	s__GS13_sp	OTU1321	0.016339	0	0	0	0	0	0	0	0	0	0	0	0	0.0816949	0.00544633	0.016339	0.0816949	0.0381243	0	0.0108927	0.00544633	0	0.016339	0	0.016339	0.0544633	0
d__Eukaryota	k__Fungi	p__Blastocladiomycota	c__Blastocladiomycetes	o__Blastocladiales	f__Physodermataceae	g__Paraphysoderma	s__Paraphysoderma_sedebokerense	OTU508	0.0217853	0.0108927	0.0435706	0	0	0.00544633	0	0	0.016339	0	0	0	0	0	0	0.0108927	0.0435706	0.016339	0.00544633	0	0.00544633	0	0	0	0.0108927	0.032678	0
d__Eukaryota	k__Fungi	p__Mortierellomycota	c__Mortierellomycetes	o__Mortierellales	f__Mortierellaceae	g__Mortierella	s__Mortierella_hyalina	OTU602	0.0108927	0	0	0	0	0	0	0	0	0	0	0	0	0	0	0	0.0708022	0	0.016339	0	0	0	0	0	0	0	0.00544633
d__Eukaryota	k__Fungi	p__Basidiomycota	c__Tremellomycetes	o__Tremellales	f__Bulleribasidiaceae	g__Vishniacozyma	s__Vishniacozyma_sp	OTU824	0.0871412	0	0.20696	0	0	0	0	0	0	0	0	0	0	0	0	0	0	0.0762486	0.00544633	0	0.0217853	0	0.157943	0.10348	0	0	0
d__Eukaryota	k__Fungi	p__Chytridiomycota	c__unclassified_p__Chytridiomycota	o__unclassified_p__Chytridiomycota	f__unclassified_p__Chytridiomycota	g__unclassified_p__Chytridiomycota	s__unclassified_p__Chytridiomycota	OTU251	0	0	0	0.00544633	0	0.0108927	0	0	0.0599096	0.032678	0.016339	0.00544633	0	0.0544633	0.032678	0	0	0	0	0	0	0.016339	0	0	0.0762486	0	0
d__Eukaryota	k__Fungi	p__Ascomycota	c__Sordariomycetes	o__Sordariales	f__Lasiosphaeriaceae	g__unclassified_f__Lasiosphaeriaceae	s__unclassified_f__Lasiosphaeriaceae	OTU1021	0.0217853	0.0381243	0.0108927	0	0	0	0.00544633	0	0.00544633	0.0108927	0	0	0.0108927	0	0	0.0925875	0.261424	0	0.00544633	0.032678	0.0108927	0.00544633	0	0.032678	0.0544633	0.0435706	0.0108927
d__Eukaryota	k__Fungi	p__unclassified_k__Fungi	c__unclassified_k__Fungi	o__unclassified_k__Fungi	f__unclassified_k__Fungi	g__unclassified_k__Fungi	s__unclassified_k__Fungi	OTU1	0	0	0	0.277763	0	0	0.310441	0	0.032678	0	0	0	0.00544633	0	0.0108927	0.0980339	0.0108927	0.0108927	0.152497	0.0108927	0.00544633	0.0435706	0	0.125266	0.239638	0.0599096	0.239638
d__Eukaryota	k__Fungi	p__Ascomycota	c__Sordariomycetes	o__Hypocreales	f__Hypocreales_fam_Incertae_sedis	g__Acremonium	s__Acremonium_sclerotigenum	OTU173	1.45962	0.255977	2.21121	0.0217853	0.0816949	0.130712	0.212407	0.0708022	0.0980339	0.201514	0.0272316	0.0272316	0.141604	0.196068	0.016339	0.288655	0.408474	0.20696	0.0871412	0.506508	0.517401	0.114373	0.0381243	0.724361	0.0381243	0.571864	0.119819
d__Eukaryota	k__Fungi	p__Ascomycota	c__Sordariomycetes	o__Sordariales	f__unclassified_o__Sordariales	g__unclassified_o__Sordariales	s__unclassified_o__Sordariales	OTU919	0	0	0.0217853	0	0	0	0.00544633	0	0	0.00544633	0	0	0.0108927	0.00544633	0.00544633	0	0	0.00544633	0.00544633	0.0490169	0.0108927	0.00544633	0.00544633	0.016339	0.201514	0.0381243	0.0435706
d__Eukaryota	k__Fungi	p__unclassified_k__Fungi	c__unclassified_k__Fungi	o__unclassified_k__Fungi	f__unclassified_k__Fungi	g__unclassified_k__Fungi	s__unclassified_k__Fungi	OTU869	0	0	0.0381243	0	0	0	0	0	0	0	0	0	0	0	0	0	0	0	0	0	0	0	0	0.016339	0	0.0108927	0
d__Eukaryota	k__Fungi	p__Basidiomycota	c__Agaricomycetes	o__Agaricales	f__Tricholomataceae	g__Arrhenia	s__Arrhenia_obatra	OTU355	0.0217853	0	0	0	0	0	0	0	0	0	0	0	0	0	0	0.0108927	0	0.0108927	0.00544633	0	0	0	0.00544633	0	0.00544633	0.0490169	0.016339
d__Eukaryota	k__Fungi	p__Ascomycota	c__Sordariomycetes	o__Hypocreales	f__Nectriaceae	g__Fusarium	s__unclassified_g__Fusarium	OTU742	0.00544633	0	0.00544633	0	0.016339	0	0	0	0	0.0108927	0	0.00544633	0.190621	0	0.0108927	0.0925875	0.0108927	0.0217853	0	0.0381243	0.0217853	0	0.00544633	0.0381243	0	0.016339	0.032678
d__Eukaryota	k__Fungi	p__Ascomycota	c__unclassified_p__Ascomycota	o__unclassified_p__Ascomycota	f__unclassified_p__Ascomycota	g__unclassified_p__Ascomycota	s__unclassified_p__Ascomycota	OTU525	0	0	0.0435706	0	0	0	0	0	0	0	0	0	0	0	0	0.0544633	0	0	0	0	0	0	0	0	0	0	0.179729
d__Eukaryota	k__Fungi	p__unclassified_k__Fungi	c__unclassified_k__Fungi	o__unclassified_k__Fungi	f__unclassified_k__Fungi	g__unclassified_k__Fungi	s__unclassified_k__Fungi	OTU210	0.0490169	0	0	0	0.528294	0.00544633	0	0.032678	0.00544633	0	0.304994	0	0	2.67415	0.00544633	0	0.032678	0	0.0108927	0.147051	0.0108927	0.0381243	0.0871412	0	0.174282	0.130712	0.00544633
d__Eukaryota	k__Fungi	p__unclassified_k__Fungi	c__unclassified_k__Fungi	o__unclassified_k__Fungi	f__unclassified_k__Fungi	g__unclassified_k__Fungi	s__unclassified_k__Fungi	OTU12	0	0	0	0.00544633	0	0.016339	0.016339	0	0.00544633	0.016339	0	0.00544633	0.016339	0.00544633	0	0	0	0	0	0	0.0599096	0.174282	0	0	0.0435706	0	0.016339
d__Eukaryota	k__Fungi	p__unclassified_k__Fungi	c__unclassified_k__Fungi	o__unclassified_k__Fungi	f__unclassified_k__Fungi	g__unclassified_k__Fungi	s__unclassified_k__Fungi	OTU10	0	0	0	0	0	0.0544633	0.032678	0	0	0	0.00544633	0	0	0	0	0	0	0	0	0	0	0	0	0	0.032678	0	0
d__Eukaryota	k__Fungi	p__Ascomycota	c__Leotiomycetes	o__Thelebolales	f__Pseudeurotiaceae	g__Pseudeurotium	s__Pseudeurotium_sp	OTU327	0	0	0.0544633	0	0.00544633	0.032678	0.00544633	0.00544633	0.0272316	0.108927	0.0108927	0.016339	0	0.0708022	0.0272316	0	0	0.00544633	0.016339	0.0217853	0	0.00544633	0	0.016339	0.0708022	0.0217853	0
d__Eukaryota	k__Fungi	p__Ascomycota	c__Sordariomycetes	o__unclassified_c__Sordariomycetes	f__unclassified_c__Sordariomycetes	g__unclassified_c__Sordariomycetes	s__unclassified_c__Sordariomycetes	OTU762	0	0	0	0	0	0	0	0	0	0	0	0	0	0.016339	0	0	0	0	0	0	0.108927	0.0816949	0	0	0.141604	0	0
d__Eukaryota	k__Fungi	p__Ascomycota	c__Sordariomycetes	o__Hypocreales	f__Nectriaceae	g__Gibberella	s__Gibberella_intricans	OTU951	4.50956	0.855073	4.37885	0.239638	1.22542	0.718915	2.32558	0.964	0.86052	0.876859	1.14917	2.85388	1.69381	6.59006	0.762486	0.501062	0.882305	1.49774	0.773378	0.974892	1.83541	1.08382	1.43238	3.50743	1.47051	1.7864	2.31469
d__Eukaryota	k__Fungi	p__Ascomycota	c__Sordariomycetes	o__Hypocreales	f__Nectriaceae	g__unclassified_f__Nectriaceae	s__unclassified_f__Nectriaceae	OTU568	0.00544633	0	0	0	0.00544633	0	0.016339	0.0108927	0	0	0.00544633	0	0.0108927	0.0217853	0	0	0	0	0.00544633	0	0.00544633	0	0	0.0435706	0.0108927	0	0
d__Eukaryota	k__Fungi	p__Basidiomycota	c__Tremellomycetes	o__Trichosporonales	f__Trichosporonaceae	g__Cutaneotrichosporon	s__unclassified_g__Cutaneotrichosporon	OTU365	0.125266	0.310441	0.495616	0.0599096	0.032678	0.0108927	0.0217853	0.016339	0.0708022	0.016339	0.272316	0.0108927	0	0	0.0217853	0.174282	0	0.212407	0	0.196068	0.0490169	0.0435706	0.00544633	0.016339	0.0925875	0	0.0980339
d__Eukaryota	k__Fungi	p__unclassified_k__Fungi	c__unclassified_k__Fungi	o__unclassified_k__Fungi	f__unclassified_k__Fungi	g__unclassified_k__Fungi	s__unclassified_k__Fungi	OTU83	0.898644	2.63602	0.925875	0.462938	0	0.00544633	0.0708022	0.0762486	3.23512	1.16007	0.217853	0.0217853	0.0381243	0.016339	1.21453	0	0.0381243	0.511955	1.26355	0	0.201514	0.392136	0.0925875	0.315887	0.332226	0.0272316	1.2581
d__Eukaryota	k__Fungi	p__unclassified_k__Fungi	c__unclassified_k__Fungi	o__unclassified_k__Fungi	f__unclassified_k__Fungi	g__unclassified_k__Fungi	s__unclassified_k__Fungi	OTU87	0	0	0.0871412	0	0.00544633	0.0381243	1.25266	0.0435706	0.63722	44.551	0	0.648113	0.0708022	0	0	0.675344	0	0.174282	2.60879	0.108927	0.724361	0.484723	0.152497	3.05539	0	0	0.0653559
d__Eukaryota	k__Fungi	p__unclassified_k__Fungi	c__unclassified_k__Fungi	o__unclassified_k__Fungi	f__unclassified_k__Fungi	g__unclassified_k__Fungi	s__unclassified_k__Fungi	OTU920	0	0.0272316	0	0	0	0	0	0	0.016339	0	0.0272316	0	0.0108927	0.00544633	0.00544633	0	0	0	0	0	0.016339	0	0.00544633	0	0.016339	0	0
d__Eukaryota	k__Fungi	p__Ascomycota	c__Dothideomycetes	o__Pleosporales	f__Corynesporascaceae	g__Corynespora	s__Corynespora_cassiicola	OTU523	0	0	0.185175	0.0108927	0	0	0	0.0217853	0	0	0.00544633	0	0.0272316	0.0272316	0	0	0	0	0.0217853	0	0	0	0.00544633	0	0	0	0
d__Eukaryota	k__Fungi	p__Ascomycota	c__Leotiomycetes	o__Thelebolales	f__Pseudeurotiaceae	g__Pseudeurotium	s__Pseudeurotium_sp	OTU234	0.00544633	0.0490169	0.0435706	0	0	0.00544633	0.00544633	0	0	0	0	0	0.0108927	0.0217853	0.0108927	0	0	0.0272316	0	0.00544633	0.016339	0	0	0.0108927	0.0217853	0	0.016339
d__Eukaryota	k__Fungi	p__unclassified_k__Fungi	c__unclassified_k__Fungi	o__unclassified_k__Fungi	f__unclassified_k__Fungi	g__unclassified_k__Fungi	s__unclassified_k__Fungi	OTU1151	0	0	0	0	0	0.0108927	0.0108927	0	0.0217853	0.0217853	0	0.0708022	0.0599096	0	0	0.0108927	0	0	0.141604	0.032678	0	0.0544633	0	0	0.130712	0	0
d__Eukaryota	k__Fungi	p__Basidiomycota	c__Wallemiomycetes	o__Wallemiales	f__Wallemiaceae	g__Wallemia	s__Wallemia_hederae	OTU706	0	0	0	0	0	0	0	0	0	0	0	0	0	0	0	0.114373	0	0.0816949	0.0544633	0	0.00544633	0.0272316	0	0	0.00544633	0	0
d__Eukaryota	k__Fungi	p__Mortierellomycota	c__Mortierellomycetes	o__Mortierellales	f__Mortierellaceae	g__Mortierella	s__Mortierella_alpina	OTU418	0.0108927	0.0708022	0	0.0108927	0	0	0.00544633	0	0	0	0	0	0	0.0272316	0.0108927	0.0217853	0	0	0	0	0	0	0	0	0.0108927	0	0
d__Eukaryota	k__Fungi	p__Ascomycota	c__Leotiomycetes	o__Helotiales	f__Helotiaceae	g__Scytalidium	s__Scytalidium_lignicola	OTU913	0	0	0	0	0	0	0	0.0272316	0	0.00544633	0	0.00544633	0.00544633	0	0	0	0	0.0108927	0.0108927	0.016339	0	0	0.00544633	0	0.0871412	0	0
d__Eukaryota	k__Fungi	p__Ascomycota	c__Sordariomycetes	o__Sordariales	f__Chaetomiaceae	g__Mycothermus	s__Mycothermus_sp	OTU86	0.0381243	0	0.00544633	0	0.0435706	0	0	0.00544633	0	0.00544633	0.0108927	0.0108927	0.016339	0.0217853	0.0108927	0	0	0	0	0	0.032678	0.0108927	0	0.0381243	0.114373	0.016339	0
d__Eukaryota	k__Fungi	p__unclassified_k__Fungi	c__unclassified_k__Fungi	o__unclassified_k__Fungi	f__unclassified_k__Fungi	g__unclassified_k__Fungi	s__unclassified_k__Fungi	OTU189	0.00544633	0.0217853	0.0762486	0.00544633	0	0	0	0	0	0.0108927	0	0	0.00544633	0	0	0	0	0	0	0	0.032678	0	0	0.032678	0	0	0.0599096
d__Eukaryota	k__Fungi	p__unclassified_k__Fungi	c__unclassified_k__Fungi	o__unclassified_k__Fungi	f__unclassified_k__Fungi	g__unclassified_k__Fungi	s__unclassified_k__Fungi	OTU1290	2.17308	4.32983	3.14253	0	0	0	0	0	0	0	0	0	0	0	0	2.03148	4.00305	1.19275	0.925875	1.02391	0.10348	0.288655	0.773378	0.827842	0.577311	2.15675	2.58156
d__Eukaryota	k__Fungi	p__Basidiomycota	c__Tremellomycetes	o__Tremellales	f__Bulleribasidiaceae	g__Vishniacozyma	s__unclassified_g__Vishniacozyma	OTU301	0.032678	0	0.0381243	0.517401	0.0762486	0.0816949	0.0108927	0	0	0.0653559	0	0.00544633	0.0980339	0	0.0490169	0	0	0.0599096	0.114373	0	0.114373	0.0108927	0.0272316	0.0217853	0.032678	0	0.147051
d__Eukaryota	k__Fungi	p__Ascomycota	c__Dothideomycetes	o__Pleosporales	f__unclassified_o__Pleosporales	g__unclassified_o__Pleosporales	s__unclassified_o__Pleosporales	OTU1025	0	0	0	0	0	0	0	0	0	0	0	0	0	0	0	0.0544633	0	0	0	0.0217853	0	0	0	0	0	0.0544633	0
d__Eukaryota	k__Fungi	p__Aphelidiomycota	c__Aphelidiomycetes	o__GS16	f__unclassified_o__GS16	g__unclassified_o__GS16	s__GS16_sp	OTU607	0.517401	1.07837	0.283209	4.06296	0.675344	1.02391	0.555525	14.362	4.14465	5.08687	3.43119	35.5482	0.354011	2.83209	7.87539	0.0708022	0.386689	0.452045	3.7743	6.43756	0.806056	29.3176	3.79609	2.87566	3.67627	1.90077	8.91564
d__Eukaryota	k__Fungi	p__Ascomycota	c__Eurotiomycetes	o__Eurotiales	f__Aspergillaceae	g__Phialosimplex	s__Phialosimplex_sp	OTU244	0.0544633	0.0108927	0.016339	0.00544633	0.00544633	0.00544633	0.0762486	0.0108927	0.016339	0.0435706	0	0.0490169	0.016339	0.00544633	0.00544633	0.016339	0.0708022	0.00544633	0	0.0490169	0.239638	0.032678	0.00544633	0.0108927	0.0816949	0.108927	0
d__Eukaryota	k__Fungi	p__Ascomycota	c__Dothideomycetes	o__Pleosporales	f__unclassified_o__Pleosporales	g__unclassified_o__Pleosporales	s__unclassified_o__Pleosporales	OTU1144	0	0.446599	0	0	0	0	0	0	0	0	0	0	0	0	0	0.0272316	0.255977	0	0	0.108927	0	0	0	0	0.168836	0.00544633	0.228746
d__Eukaryota	k__Fungi	p__Ascomycota	c__Eurotiomycetes	o__Chaetothyriales	f__Herpotrichiellaceae	g__Cladophialophora	s__unclassified_g__Cladophialophora	OTU915	0.0108927	0.0272316	0	0	0	0	0	0	0	0	0	0	0	0	0	0	0	0.00544633	0.0108927	0	0	0	0	0	0.0217853	0	0
d__Eukaryota	k__Fungi	p__Ascomycota	c__Sordariomycetes	o__Sordariales	f__Lasiosphaeriaceae	g__unclassified_f__Lasiosphaeriaceae	s__unclassified_f__Lasiosphaeriaceae	OTU832	0	0.0435706	0	0	0	0	0.0871412	0.0108927	0	0	0.147051	0	0	0	0.032678	0	0	0	0.212407	0	0	0.00544633	0.457491	0	0.00544633	0	0.0544633
d__Eukaryota	k__Fungi	p__Mortierellomycota	c__Mortierellomycetes	o__Mortierellales	f__Mortierellaceae	g__Mortierella	s__Mortierella_polycephala	OTU182	0	0	0.174282	0	0	0	0	0	0	0	0	0.0435706	0.0762486	0	0	0	0	0.108927	0.0108927	0	0	0	0	0.00544633	0	0.457491	0
d__Eukaryota	k__Fungi	p__Basidiomycota	c__Tremellomycetes	o__Tremellales	f__Rhynchogastremataceae	g__Papiliotrema	s__Papiliotrema_flavescens	OTU26	0	0	0.108927	0	0	0	0	0.016339	0	0	0	0	0	0	0	0	0	0	0	0.0871412	0	0.00544633	0.0490169	0.0599096	0	0	0
d__Eukaryota	k__Fungi	p__Basidiomycota	c__Tremellomycetes	o__Tremellales	f__Trimorphomycetaceae	g__Saitozyma	s__Saitozyma_flava	OTU320	0	0	0	0	0	0.0217853	0.00544633	0	0	0	0.0108927	0	0	0	0	0	0	0	0	0	0	0	0.016339	0	0	0	0
d__Eukaryota	k__Fungi	p__Mortierellomycota	c__Mortierellomycetes	o__Mortierellales	f__Mortierellaceae	g__Mortierella	s__unclassified_g__Mortierella	OTU1192	0.0381243	0	0.0435706	0	0	0	0	0	0	0	0	0	0	0	0	0.0762486	0	0.0217853	0	0.0272316	0	0	0	0	0	0	0.0708022
d__Eukaryota	k__Fungi	p__unclassified_k__Fungi	c__unclassified_k__Fungi	o__unclassified_k__Fungi	f__unclassified_k__Fungi	g__unclassified_k__Fungi	s__unclassified_k__Fungi	OTU143	0	0	0	0	0.016339	0	0.0108927	0.00544633	0.016339	0.0653559	0.00544633	0	0	0.00544633	0.0108927	0	0	0	0	0	0	0	0	0	0	0	0
d__Eukaryota	k__Fungi	p__unclassified_k__Fungi	c__unclassified_k__Fungi	o__unclassified_k__Fungi	f__unclassified_k__Fungi	g__unclassified_k__Fungi	s__unclassified_k__Fungi	OTU148	0	0	0	0	0	0.032678	0	0.0217853	0.125266	0	0.0490169	0.10348	0	0.10348	0.0217853	0	0.00544633	0	0	0	0	0	0	0	0.0544633	0.0871412	0.0272316
d__Eukaryota	k__Fungi	p__Ascomycota	c__Sordariomycetes	o__Glomerellales	f__Plectosphaerellaceae	g__Lectera	s__Lectera_sp	OTU512	0	0	0.0217853	0	0	0	0	0	0	0	0	0	0	0	0	0	0	0	0	0.0108927	0	0	0	0.0108927	0	0	0
d__Eukaryota	k__Fungi	p__unclassified_k__Fungi	c__unclassified_k__Fungi	o__unclassified_k__Fungi	f__unclassified_k__Fungi	g__unclassified_k__Fungi	s__unclassified_k__Fungi	OTU1310	0	0	0	0	0	0	0	0	0	0	0	0	0	0	0	0	0	0.00544633	0	0.032678	0.0108927	0	0.0217853	0	0	0	0
d__Eukaryota	k__Fungi	p__unclassified_k__Fungi	c__unclassified_k__Fungi	o__unclassified_k__Fungi	f__unclassified_k__Fungi	g__unclassified_k__Fungi	s__unclassified_k__Fungi	OTU264	0.032678	0	0	0	0.0599096	0.108927	0.0108927	0.0435706	0	0.234192	0.348565	6.12712	0.0653559	20.4346	14.5798	0	0.0217853	0.00544633	0	0.0381243	0	0.0490169	0.130712	0.0217853	0.196068	0.795164	0.0381243
d__Eukaryota	k__Fungi	p__Ascomycota	c__Sordariomycetes	o__unclassified_c__Sordariomycetes	f__unclassified_c__Sordariomycetes	g__unclassified_c__Sordariomycetes	s__unclassified_c__Sordariomycetes	OTU1317	0	0	0.0217853	0	0	0	0	0	0	0	0	0	0	0	0	0	0.0544633	0.0490169	0	0.032678	0	0	0	0	0	0	0
d__Eukaryota	k__Fungi	p__Ascomycota	c__Leotiomycetes	o__Helotiales	f__Hyaloscyphaceae	g__Cistella	s__Cistella_sp	OTU337	0.0816949	0	0	0	0	0	0	0.00544633	0	0.00544633	0	0	0	0	0	0.00544633	0.0980339	0	0.0108927	0	0.00544633	0.0108927	0	0	0.00544633	0	0
d__Eukaryota	k__Fungi	p__Basidiomycota	c__Tremellomycetes	o__Tremellales	f__Bulleribasidiaceae	g__Hannaella	s__Hannaella_zeae	OTU662	0	0	0.10348	0	0	0	0	0	0	0	0	0	0	0	0	0.0435706	0	0	0	0.196068	0.016339	0	0	0	0	0	0
d__Eukaryota	k__Fungi	p__Ascomycota	c__Sordariomycetes	o__Hypocreales	f__Clavicipitaceae	g__Metarhizium	s__Metarhizium_marquandii	OTU842	0.0217853	0	0.0435706	0	0	0	0.0108927	0	0	0	0	0	0	0	0	0	0	0	0	0	0.016339	0	0.0217853	0	0	0	0.00544633
d__Eukaryota	k__Fungi	p__Ascomycota	c__Leotiomycetes	o__Helotiales	f__Vibrisseaceae	g__Phialocephala	s__unclassified_g__Phialocephala	OTU1106	0	0	0	0	0	0	0	0	0	0	0	0	0	0	0	0	0	0	0	0	0	0	0	0	0.108927	0.0435706	0.0762486
d__Eukaryota	k__Fungi	p__unclassified_k__Fungi	c__unclassified_k__Fungi	o__unclassified_k__Fungi	f__unclassified_k__Fungi	g__unclassified_k__Fungi	s__unclassified_k__Fungi	OTU214	0	0.0217853	0	0	0	0	0.00544633	0	0	0	0.016339	0	0.00544633	0.032678	0	0	0	0	0	0.0490169	0	0	0.016339	0	0	0	0
d__Eukaryota	k__Fungi	p__Ascomycota	c__Sordariomycetes	o__Sordariales	f__unclassified_o__Sordariales	g__unclassified_o__Sordariales	s__unclassified_o__Sordariales	OTU811	0.0381243	0.190621	0	0.0217853	0.0217853	0.0108927	0.10348	0.0108927	0.016339	0.10348	0.0381243	0.00544633	0.10348	0.130712	0.016339	0	0.016339	0.0435706	0.032678	0.147051	0.506508	0.0435706	0.272316	0.10348	0.0272316	0.179729	0
d__Eukaryota	k__Fungi	p__Mortierellomycota	c__Mortierellomycetes	o__Mortierellales	f__Mortierellaceae	g__Mortierella	s__Mortierella_elongata	OTU158	1.07837	1.73193	1.78095	3.4911	0.141604	0.495616	2.57611	0.588203	1.00757	0.408474	0.784271	1.54676	1.14917	0.718915	0.517401	1.07837	1.80818	1.24721	4.85268	0.958553	1.14917	0.882305	2.38004	1.24721	1.37792	1.81907	0.457491
d__Eukaryota	k__Fungi	p__Ascomycota	c__Sordariomycetes	o__Sordariales	f__Lasiosphaeriaceae	g__Schizothecium	s__Schizothecium_glutinans	OTU43	0.00544633	0	0.00544633	0	0	0.016339	0.0653559	0.375797	0.0871412	0.0217853	0.0871412	0.0272316	0.0381243	0.0490169	0.0381243	0.0816949	0.0435706	0.0272316	0.392136	0.0490169	0.0871412	0.190621	0.125266	0.0599096	0.234192	0.0435706	0
d__Eukaryota	k__Fungi	p__Glomeromycota	c__Paraglomeromycetes	o__Paraglomerales	f__unclassified_o__Paraglomerales	g__unclassified_o__Paraglomerales	s__unclassified_o__Paraglomerales	OTU952	0	0.016339	0	0	0	0	0	0	0	0	0	0	0	0	0	0.00544633	0	0	0	0	0	0	0	0	0.016339	0.032678	0
d__Eukaryota	k__Fungi	p__unclassified_k__Fungi	c__unclassified_k__Fungi	o__unclassified_k__Fungi	f__unclassified_k__Fungi	g__unclassified_k__Fungi	s__unclassified_k__Fungi	OTU283	0	0	0	0.0599096	0.0108927	0	0	0.00544633	0	0	0.125266	0	0	0	0	0	0	0	0.00544633	0.0108927	0	0	0	0	0	0	0
d__Eukaryota	k__Fungi	p__Basidiomycota	c__Agaricomycetes	o__Thelephorales	f__Thelephoraceae	g__Tomentella	s__Tomentella_ellisii	OTU543	0	0.0925875	0.0980339	0	0	0	0	0	0	0	0	0	0	0	0	0.0653559	0.0544633	0.0708022	0.0108927	0	0.00544633	0	0.0435706	0.0108927	0.0217853	0.234192	0.141604
d__Eukaryota	k__Fungi	p__Ascomycota	c__Dothideomycetes	o__Pleosporales	f__Didymellaceae	g__unclassified_f__Didymellaceae	s__unclassified_f__Didymellaceae	OTU559	0	0	0.0217853	0	0	0.00544633	0	0	0	0	0	0.00544633	0	0.0108927	0	0	0	0	0	0.00544633	0.0217853	0	0.0816949	0.032678	0	0	0
d__Eukaryota	k__Fungi	p__unclassified_k__Fungi	c__unclassified_k__Fungi	o__unclassified_k__Fungi	f__unclassified_k__Fungi	g__unclassified_k__Fungi	s__unclassified_k__Fungi	OTU53	0	0	0	0.00544633	0	0.00544633	0.00544633	0.0490169	0.0490169	0.0871412	0.0217853	0.00544633	0	0.10348	0.0217853	0	0	0	0	0	0.00544633	0.00544633	0	0	0.0108927	0	0
d__Eukaryota	k__Fungi	p__unclassified_k__Fungi	c__unclassified_k__Fungi	o__unclassified_k__Fungi	f__unclassified_k__Fungi	g__unclassified_k__Fungi	s__unclassified_k__Fungi	OTU56	0	0	0	0	0.403028	0	0	0	0.147051	0	0	0.0653559	0	0	0.00544633	0	0	0.032678	0	0	0	0	0.00544633	0	0	0.0708022	0
d__Eukaryota	k__Fungi	p__unclassified_k__Fungi	c__unclassified_k__Fungi	o__unclassified_k__Fungi	f__unclassified_k__Fungi	g__unclassified_k__Fungi	s__unclassified_k__Fungi	OTU284	0	0	0	0.20696	0	0	0	0	0	0	0	0	0	0	0	0	0	0.0435706	0	0	0	0.0217853	0	0	0	0	0
d__Eukaryota	k__Fungi	p__Ascomycota	c__Leotiomycetes	o__Helotiales	f__Leotiaceae	g__Neobulgaria	s__Neobulgaria_sp	OTU436	0	0	0	0	0	0	0	0	0	0	0	0	0	0	0	0.0816949	0.0980339	0.00544633	0.00544633	0.00544633	0	0	0	0.0217853	0.0217853	0	0
d__Eukaryota	k__Fungi	p__unclassified_k__Fungi	c__unclassified_k__Fungi	o__unclassified_k__Fungi	f__unclassified_k__Fungi	g__unclassified_k__Fungi	s__unclassified_k__Fungi	OTU772	0.0599096	0.239638	0.152497	0.0108927	0.217853	0.648113	0	0.016339	2.93012	0.0490169	0	1.15462	0.0925875	0.0544633	11.9057	0	0	0.0108927	0.125266	0	0.631774	11.5353	0.0980339	0.179729	0.130712	0.00544633	0.0435706
d__Eukaryota	k__Fungi	p__Ascomycota	c__Eurotiomycetes	o__Eurotiales	f__Trichocomaceae	g__Talaromyces	s__unclassified_g__Talaromyces	OTU731	0.00544633	0	0	0	0.016339	0	0	0	0	0.00544633	0	0	0	0	0.0108927	0	0.0653559	0.00544633	0.0108927	0	0.0435706	0	0	0.0108927	0.0272316	0	0
d__Eukaryota	k__Fungi	p__unclassified_k__Fungi	c__unclassified_k__Fungi	o__unclassified_k__Fungi	f__unclassified_k__Fungi	g__unclassified_k__Fungi	s__unclassified_k__Fungi	OTU858	0.032678	0.0435706	0.0435706	0	0	0	0	0	0	0	0	0	0	0	0	0.0272316	0	0.00544633	0.0217853	0.0108927	0	0	0	0.0108927	0	0.016339	0.0544633
d__Eukaryota	k__Fungi	p__unclassified_k__Fungi	c__unclassified_k__Fungi	o__unclassified_k__Fungi	f__unclassified_k__Fungi	g__unclassified_k__Fungi	s__unclassified_k__Fungi	OTU774	0	0	0	0	0	0	0.016339	0	0	0.0217853	0	0.0108927	0.00544633	0	0.0544633	0	0	0.0381243	0.147051	0	0.0108927	0.250531	0	0	0	0	0.0381243
d__Eukaryota	k__Fungi	p__unclassified_k__Fungi	c__unclassified_k__Fungi	o__unclassified_k__Fungi	f__unclassified_k__Fungi	g__unclassified_k__Fungi	s__unclassified_k__Fungi	OTU673	0.0108927	0	0	0	0	0	0	0	0	0.00544633	0	0	0	0	0	0.130712	0.0381243	0.0272316	0.00544633	0.016339	0.00544633	0	0	0	0	0.00544633	0
d__Eukaryota	k__Fungi	p__Basidiomycota	c__Tremellomycetes	o__Trichosporonales	f__Trichosporonaceae	g__Apiotrichum	s__unclassified_g__Apiotrichum	OTU415	0	0.119819	0.0108927	0	0	0.0108927	0	0	0	0	0.0217853	0	0	0	0.0272316	0	0.0544633	0	0	0	0	0	0	0	0.0108927	0	0.032678
d__Eukaryota	k__Fungi	p__Ascomycota	c__Sordariomycetes	o__Microascales	f__Microascaceae	g__Kernia	s__unclassified_g__Kernia	OTU1142	0.016339	0	0.0490169	0	0.016339	0.00544633	0	0.0108927	0.00544633	0.0272316	0.0108927	0.0108927	0.00544633	0.016339	0	0.016339	0.032678	0.00544633	0.00544633	0.0217853	0.016339	0	0.00544633	0.0272316	0.0980339	0.032678	0
d__Eukaryota	k__Fungi	p__Basidiomycota	c__Tremellomycetes	o__Filobasidiales	f__Piskurozymaceae	g__Solicoccozyma	s__Solicoccozyma_terrea	OTU1066	0	0	0	0	0	0	0	0	0	0	0	0	0	0	0	0	0	0.0108927	0.0108927	0.032678	0	0	0	0	0	0.0762486	0
d__Eukaryota	k__Fungi	p__Ascomycota	c__Leotiomycetes	o__Helotiales	f__Hyaloscyphaceae	g__Pezizella	s__Pezizella_sp	OTU1295	0.0544633	0.0762486	0.152497	0	0	0	0	0	0	0	0	0	0	0	0	0.0980339	0.631774	0.0217853	0.0544633	0.20696	0.00544633	0	0	0	0.0980339	0.0435706	0.0435706
d__Eukaryota	k__Fungi	p__Ascomycota	c__Saccharomycetes	o__Saccharomycetales	f__unclassified_o__Saccharomycetales	g__unclassified_o__Saccharomycetales	s__unclassified_o__Saccharomycetales	OTU305	0	0	0	0	0.00544633	0.609989	0.0108927	0.00544633	0.0544633	0	0	0.0272316	0	0	0.00544633	0.00544633	0.0871412	0	0	0	0.00544633	0.00544633	0	0	0	0	0
d__Eukaryota	k__Fungi	p__Basidiomycota	c__Agaricomycetes	o__Sebacinales	f__Sebacinaceae	g__Sebacina	s__Sebacina_sp	OTU825	1.30167	4.88535	2.1513	0	0	0	0	0	0	0	0	0	0	0	0	0.626328	4.12832	0.942214	0.375797	1.50863	0.10348	0.223299	1.92255	0.479277	0.69713	1.58488	2.5271
d__Eukaryota	k__Fungi	p__Mortierellomycota	c__Mortierellomycetes	o__Mortierellales	f__Mortierellaceae	g__Mortierella	s__Mortierella_indohii	OTU633	4.50411	1.92255	8.86117	15.1244	0.337672	2.57611	2.40728	0.0871412	0.784271	10.2173	0.255977	0.577311	14.8358	0.217853	0.375797	0.255977	0.168836	0.283209	2.17308	1.71015	1.08927	0.560972	1.31801	3.51833	0.294102	0.588203	3.06084
d__Eukaryota	k__Fungi	p__Ascomycota	c__Sordariomycetes	o__Sordariales	f__Chaetomiaceae	g__unclassified_f__Chaetomiaceae	s__unclassified_f__Chaetomiaceae	OTU726	0	0	0.00544633	0	0.00544633	0	0	0	0	0	0	0	0.0108927	0	0	0	0	0.00544633	0	0	0.653559	0	0	0.032678	0.0108927	0	0
d__Eukaryota	k__Fungi	p__unclassified_k__Fungi	c__unclassified_k__Fungi	o__unclassified_k__Fungi	f__unclassified_k__Fungi	g__unclassified_k__Fungi	s__unclassified_k__Fungi	OTU1012	0	0	0	0	0	0	0	0	0	0	0	0	0	0	0	0	0	0.016339	0	0	0.00544633	0	0	0.0272316	0	0.119819	0.0599096
d__Eukaryota	k__Fungi	p__Ascomycota	c__Dothideomycetes	o__Venturiales	f__Venturiaceae	g__Venturia	s__unclassified_g__Venturia	OTU639	0.016339	0.0816949	0.0381243	0	0	0	0	0	0	0	0	0	0	0	0	0.032678	0.147051	0	0.00544633	0.0435706	0	0	0.0108927	0.00544633	0.0599096	0.00544633	0
d__Eukaryota	k__Fungi	p__Aphelidiomycota	c__Aphelidiomycetes	o__GS16	f__unclassified_o__GS16	g__unclassified_o__GS16	s__GS16_sp	OTU721	0.136158	0	0.0217853	0.0381243	0	0.032678	0.0381243	0	0.0599096	0.0108927	0.119819	0.00544633	0.016339	0.0762486	0.114373	0	0.0272316	0	0	0.0762486	0.032678	0.0272316	0.0272316	0.0871412	0	0.032678	0
d__Eukaryota	k__Fungi	p__Ascomycota	c__Eurotiomycetes	o__Eurotiales	f__Aspergillaceae	g__Aspergillus	s__Aspergillus_fumigatus	OTU763	0.0108927	0.0217853	0	0	0.0217853	0	0	0	0	0	0.00544633	0.016339	0.0108927	0.0381243	0.0108927	0	0.00544633	0	0.016339	0.0217853	0.016339	0.0381243	0	0.0108927	0.0599096	0.0544633	0.0217853
d__Eukaryota	k__Fungi	p__Ascomycota	c__Sordariomycetes	o__Glomerellales	f__Plectosphaerellaceae	g__Verticillium	s__Verticillium_klebahnii	OTU759	0.354011	0.108927	0.119819	0.0272316	0	0.0272316	0.0217853	0	0.00544633	0.0435706	0.0435706	0.0435706	0.0217853	0.136158	0.0381243	0.00544633	0.136158	0.016339	0	0.0544633	0.0544633	0.016339	0.0871412	0.865966	0	0.32678	0.435706
d__Eukaryota	k__Fungi	p__Ascomycota	c__Sordariomycetes	o__Sordariales	f__Lasiosphaeriaceae	g__Schizothecium	s__unclassified_g__Schizothecium	OTU1165	0	0.00544633	0	0	0	0	0	0	0	0	0	0	0	0	0	0.0435706	0.032678	0	0	0.016339	0	0	0	0	0	0	0.032678
d__Eukaryota	k__Fungi	p__Ascomycota	c__Sordariomycetes	o__Hypocreales	f__Nectriaceae	g__Neonectria	s__Neonectria_candida	OTU566	0.0108927	0	0	0	0	0	0	0	0	0	0	0.0108927	0.00544633	0	0.0108927	0	0.108927	0	0.0490169	0.0816949	0.0217853	0	0	0	0	0	0
d__Eukaryota	k__Fungi	p__Rozellomycota	c__unclassified_p__Rozellomycota	o__unclassified_p__Rozellomycota	f__unclassified_p__Rozellomycota	g__unclassified_p__Rozellomycota	s__Rozellomycota_sp	OTU751	0	0	0	0	0.0435706	0	0.0108927	0	0.00544633	0	0	0	0.0544633	0	0.0599096	0	0	0.0272316	0	0	0.0272316	0.147051	0	0.0708022	0.016339	0	0.130712
d__Eukaryota	k__Fungi	p__Chytridiomycota	c__unclassified_p__Chytridiomycota	o__unclassified_p__Chytridiomycota	f__unclassified_p__Chytridiomycota	g__unclassified_p__Chytridiomycota	s__unclassified_p__Chytridiomycota	OTU267	0	0	0	0	0	0.032678	0.00544633	0	0	0	0	0	0	0	0.0599096	0	0	0	0	0	0	0	0	0	0.0217853	0	0.00544633
d__Eukaryota	k__Fungi	p__Ascomycota	c__Dothideomycetes	o__Pleosporales	f__Sporormiaceae	g__Preussia	s__Preussia_globosa	OTU1048	0	0.0108927	0	0	0	0	0	0	0.0108927	0.0217853	0.0108927	0.00544633	0	0	0.0108927	0	0.032678	0	0	0	0	0	0.0217853	0	0.00544633	0.0217853	0
d__Eukaryota	k__Fungi	p__Basidiomycota	c__Agaricomycetes	o__Agaricales	f__Strophariaceae	g__Deconica	s__unclassified_g__Deconica	OTU821	0.016339	0.0217853	0.0217853	0	0	0	0	0	0	0	0	0	0	0	0	0.0217853	0.0490169	0.0217853	0.0217853	0.0217853	0	0	0.0108927	0.00544633	0	0.016339	0.016339
d__Eukaryota	k__Fungi	p__Aphelidiomycota	c__Aphelidiomycetes	o__GS16	f__unclassified_o__GS16	g__unclassified_o__GS16	s__GS16_sp	OTU40	0	0	0.0762486	0	0	0	0.00544633	0.0381243	0	0	0	0	0	0	0	0	0	0	0.0108927	0	0	0.0490169	0	0	0	0	0
d__Eukaryota	k__Fungi	p__Ascomycota	c__Sordariomycetes	o__Microascales	f__Microascaceae	g__Pseudallescheria	s__unclassified_g__Pseudallescheria	OTU626	0.217853	0.517401	0.245085	0	0	0	0.0980339	0.016339	0.0108927	0.0381243	0.0381243	0.00544633	0.0272316	0.174282	0.0381243	0.152497	0.909537	0.119819	0.10348	0.239638	0.0599096	0.00544633	0.0544633	0.201514	0.239638	0.294102	0.381243
d__Eukaryota	k__Fungi	p__Ascomycota	c__Saccharomycetes	o__Saccharomycetales	f__Saccharomycetales_fam_Incertae_sedis	g__Candida	s__unclassified_g__Candida	OTU374	0.0653559	0	0.00544633	0	0	0.00544633	0.00544633	0	0	0	0	0	0	0	0	0	0	0	0	0.0108927	0	0	0	0.0272316	0.00544633	0	0
d__Eukaryota	k__Fungi	p__unclassified_k__Fungi	c__unclassified_k__Fungi	o__unclassified_k__Fungi	f__unclassified_k__Fungi	g__unclassified_k__Fungi	s__unclassified_k__Fungi	OTU452	0	0.0925875	0	0	0	0	0	0	0	0	0	0	0	0	0	0.0217853	0	0	0	0	0	0	0.0925875	0	0	0	0.0708022
d__Eukaryota	k__Fungi	p__Rozellomycota	c__unclassified_p__Rozellomycota	o__unclassified_p__Rozellomycota	f__unclassified_p__Rozellomycota	g__unclassified_p__Rozellomycota	s__Rozellomycota_sp	OTU615	0	0	0	0	0	0	0.00544633	0.0381243	0.130712	0.00544633	0.0599096	0.0108927	0	0.00544633	0.157943	0	0	0.00544633	1.29078	0	0.0980339	0	0.00544633	0.00544633	0.00544633	0.0653559	0
d__Eukaryota	k__Fungi	p__unclassified_k__Fungi	c__unclassified_k__Fungi	o__unclassified_k__Fungi	f__unclassified_k__Fungi	g__unclassified_k__Fungi	s__unclassified_k__Fungi	OTU109	0.0599096	0.310441	0	0.016339	0.0381243	0.0217853	0.0217853	0.0217853	0.0544633	0	0.0217853	0.016339	0.00544633	0.0490169	0	0.00544633	0.00544633	0.0816949	0.032678	0	0.016339	0.00544633	0.10348	0.016339	0.0272316	0.0108927	0.0381243
d__Eukaryota	k__Fungi	p__Ascomycota	c__Sordariomycetes	o__Microascales	f__Microascaceae	g__Kernia	s__unclassified_g__Kernia	OTU969	0	0	0.0381243	0	0.016339	0.00544633	0	0.00544633	0.00544633	0.0108927	0.016339	0.00544633	0.0108927	0.0108927	0.00544633	0	0	0.00544633	0.00544633	0.00544633	0.00544633	0.0108927	0	0	0.0435706	0	0
d__Eukaryota	k__Fungi	p__Ascomycota	c__Sordariomycetes	o__Sordariales	f__Chaetomiaceae	g__Trichocladium	s__Trichocladium_asperum	OTU681	0.00544633	0	0.0108927	0	0.0217853	0.00544633	0.032678	0	0.0272316	0.016339	0	0	0	0.00544633	0	0.00544633	0.0435706	0.0217853	0.0217853	0.0272316	0.724361	0.0272316	0	0.0381243	0.0708022	0.0272316	0
d__Eukaryota	k__Fungi	p__Basidiomycota	c__Cystobasidiomycetes	o__Cystobasidiomycetes_ord_Incertae_sedis	f__Symmetrosporaceae	g__Symmetrospora	s__Symmetrospora_symmetrica	OTU29	0	0	0.0217853	0	0	0	0.00544633	0.00544633	0	0.0381243	0.016339	0	0.0108927	0	0	0	0.032678	0.016339	0	0	0	0	0	0.00544633	0	0	0
d__Eukaryota	k__Fungi	p__Ascomycota	c__unclassified_p__Ascomycota	o__unclassified_p__Ascomycota	f__unclassified_p__Ascomycota	g__unclassified_p__Ascomycota	s__unclassified_p__Ascomycota	OTU1102	0	0	0	0	0	0	0	0	0	0	0	0	0	0	0	0	0.00544633	0	0	0	0	0	0	0.0108927	0	0.016339	0.016339
d__Eukaryota	k__Fungi	p__Ascomycota	c__Dothideomycetes	o__Pleosporales	f__Pleosporales_fam_Incertae_sedis	g__Dokmaia	s__Dokmaia_sp	OTU315	0	0	0.0708022	0	0.0217853	0.016339	0	0.0217853	0	0	0	0	0	0	0	0	0	0.0217853	0.016339	0	0.016339	0.0272316	0.0925875	0	0	0	0.0871412
d__Eukaryota	k__Fungi	p__unclassified_k__Fungi	c__unclassified_k__Fungi	o__unclassified_k__Fungi	f__unclassified_k__Fungi	g__unclassified_k__Fungi	s__unclassified_k__Fungi	OTU698	0	0	0	0	0	0	0	0	0	0	0	0	0.0217853	0	0	0	0	0.0272316	0	0	0.0599096	0	0	0	0	0	0
d__Eukaryota	k__Fungi	p__unclassified_k__Fungi	c__unclassified_k__Fungi	o__unclassified_k__Fungi	f__unclassified_k__Fungi	g__unclassified_k__Fungi	s__unclassified_k__Fungi	OTU515	0	0.00544633	0.0272316	0	0	0	0	0	0.00544633	0	0	0.00544633	0	0	0.016339	0.0108927	0	0	0	0	0.00544633	0	0	0	0.00544633	0	0.00544633
d__Eukaryota	k__Fungi	p__Basidiomycota	c__Agaricomycetes	o__Agaricales	f__Entolomataceae	g__Entoloma	s__unclassified_g__Entoloma	OTU1181	0	0	0	0	0	0	0	0	0	0	0	0	0	0	0	0.0544633	0.0435706	0	0	0	0	0	0	0	0.00544633	0.00544633	0
d__Eukaryota	k__Fungi	p__Ascomycota	c__Eurotiomycetes	o__Eurotiales	f__Trichocomaceae	g__Rasamsonia	s__Rasamsonia_emersonii	OTU956	0	0.0108927	0	0	0	0	0	0	0	0.00544633	0.00544633	0	0	0	0	0	0.0272316	0	0	0	0.016339	0	0	0	0.0272316	0	0
d__Eukaryota	k__Fungi	p__Ascomycota	c__Sordariomycetes	o__Sordariales	f__Sordariaceae	g__unclassified_f__Sordariaceae	s__unclassified_f__Sordariaceae	OTU569	0.00544633	0	0.0108927	0	0	0	0	0	0.0435706	0.00544633	0	0	0	0.0435706	0	0	0	0	0.00544633	0	0	0.00544633	0.00544633	0.016339	0.0272316	0	0
d__Eukaryota	k__Fungi	p__unclassified_k__Fungi	c__unclassified_k__Fungi	o__unclassified_k__Fungi	f__unclassified_k__Fungi	g__unclassified_k__Fungi	s__unclassified_k__Fungi	OTU61	0.0108927	0	0	0	0	0	0.0108927	0	0.0108927	0	0.0108927	0	0	0	0	0	0	0	0	0	0	0	0.016339	0	0	0	0.0217853
d__Eukaryota	k__Fungi	p__Ascomycota	c__Eurotiomycetes	o__Chaetothyriales	f__Herpotrichiellaceae	g__Exophiala	s__unclassified_g__Exophiala	OTU511	0.00544633	0	0.0381243	0	0	0	0	0	0	0	0	0	0	0	0	0	0.0381243	0	0.0217853	0	0	0	0	0	0	0	0
d__Eukaryota	k__Fungi	p__Chytridiomycota	c__Rhizophydiomycetes	o__Rhizophydiales	f__Rhizophydiaceae	g__Rhizophydium	s__Rhizophydium_sp	OTU1146	0.00544633	0	0.00544633	0	0	0	0	0	0	0	0	0	0	0	0	0.00544633	0.0272316	0.00544633	0.0108927	0	0	0	0.0108927	0.0217853	0	0	0
d__Eukaryota	k__Fungi	p__Ascomycota	c__Sordariomycetes	o__Hypocreales	f__Hypocreales_fam_Incertae_sedis	g__Acremonium	s__Acremonium_curvulum	OTU362	0.0272316	0	0	0	0	0	0	0	0	0	0	0	0	0	0	0.0490169	0	0	0	0	0	0	0	0.0599096	0	0	0
d__Eukaryota	k__Fungi	p__Mortierellomycota	c__Mortierellomycetes	o__Mortierellales	f__Mortierellaceae	g__Mortierella	s__unclassified_g__Mortierella	OTU1058	0	0	0.016339	0	0	0	0	0	0	0	0	0	0	0	0	0	0.0490169	0	0.016339	0	0	0	0	0.0108927	0	0.0871412	0
d__Eukaryota	k__Fungi	p__unclassified_k__Fungi	c__unclassified_k__Fungi	o__unclassified_k__Fungi	f__unclassified_k__Fungi	g__unclassified_k__Fungi	s__unclassified_k__Fungi	OTU527	0	0	0.255977	0	0	0	0	0	0	0	0	0	0	0	0	0.147051	0.0925875	0	0.032678	0.0708022	0.00544633	0	0	0.108927	0	0	0.26687
d__Eukaryota	k__Fungi	p__Ascomycota	c__Eurotiomycetes	o__Eurotiales	f__Aspergillaceae	g__Monascus	s__Monascus_pilosus	OTU1069	0.0490169	0.130712	0.0708022	0	0	0	0	0	0	0	0	0	0	0	0	0.157943	0.653559	0.0272316	0.0217853	0.10348	0	0	0.00544633	0.0217853	0.0980339	0.0544633	0
d__Eukaryota	k__Fungi	p__Rozellomycota	c__unclassified_p__Rozellomycota	o__unclassified_p__Rozellomycota	f__unclassified_p__Rozellomycota	g__unclassified_p__Rozellomycota	s__Rozellomycota_sp	OTU249	0.032678	0	0	0	0	0	0	0	0	0	0	0.00544633	0	0	2.71772	0	0	0	0	0	0.0381243	0	0	0	0.016339	0	0.0544633
d__Eukaryota	k__Fungi	p__Chytridiomycota	c__unclassified_p__Chytridiomycota	o__unclassified_p__Chytridiomycota	f__unclassified_p__Chytridiomycota	g__unclassified_p__Chytridiomycota	s__unclassified_p__Chytridiomycota	OTU154	0	0	0	0	0	0.272316	0	0	0.00544633	0	0	0.157943	0	0.0108927	0	0	0	0	0.0217853	0	0	0	0	0	0	0	0
d__Eukaryota	k__Fungi	p__Ascomycota	c__Leotiomycetes	o__Helotiales	f__Hyaloscyphaceae	g__Lachnum	s__Lachnum_sp	OTU1220	0	0	0	0	0	0	0	0	0	0	0	0	0	0	0	0	0.0816949	0	0	0	0	0.00544633	0	0	0.0381243	0	0.0435706
d__Eukaryota	k__Fungi	p__Basidiomycota	c__Tremellomycetes	o__Tremellales	f__Bulleribasidiaceae	g__Vishniacozyma	s__Vishniacozyma_heimaeyensis	OTU659	0.0816949	0	0	0.0871412	0	0.00544633	0.016339	0.0381243	0.0381243	0.0108927	0.0653559	0.032678	0.00544633	0.108927	0.0108927	0	0.125266	0.0816949	0.157943	0.283209	0.16339	0.0816949	0.0871412	0.0272316	0.0108927	0	0.168836
d__Eukaryota	k__Fungi	p__Ascomycota	c__Dothideomycetes	o__Pleosporales	f__Sporormiaceae	g__Westerdykella	s__Westerdykella_sp	OTU748	0	0	0	0	0.00544633	0	0	0.032678	0	0	0.00544633	0.032678	0	0.0217853	0.0108927	0	0	0	0	0	0.0272316	0.00544633	0.0217853	0	0.0272316	0.016339	0.114373
d__Eukaryota	k__Fungi	p__Basidiomycota	c__Agaricomycetes	o__Russulales	f__Lachnocladiaceae	g__Vararia	s__Vararia_abortiphysa	OTU1257	0	0	0	0	0	0	0	0	0	0	0	0	0	0	0	0.0381243	0.0708022	0.016339	0.00544633	0	0	0	0	0.016339	0.0108927	0	0.0272316
d__Eukaryota	k__Fungi	p__unclassified_k__Fungi	c__unclassified_k__Fungi	o__unclassified_k__Fungi	f__unclassified_k__Fungi	g__unclassified_k__Fungi	s__unclassified_k__Fungi	OTU636	0.136158	0.397582	0.0980339	0	0	0	0	0	0	0	0	0	0	0	0	0.136158	0	0.0925875	0.0653559	0.136158	0.0272316	0	0.108927	0.00544633	0.157943	0.016339	0.185175
d__Eukaryota	k__Fungi	p__Ascomycota	c__Sordariomycetes	o__unclassified_c__Sordariomycetes	f__unclassified_c__Sordariomycetes	g__unclassified_c__Sordariomycetes	s__unclassified_c__Sordariomycetes	OTU813	0	0	0	0	0	0.0108927	0.032678	0	0.0217853	0.0980339	0.0272316	0.0544633	0.277763	0	0	0	0	0	0.517401	0.157943	0	0.468384	1.74282	0	0.0490169	0	0.016339
d__Eukaryota	k__Fungi	p__unclassified_k__Fungi	c__unclassified_k__Fungi	o__unclassified_k__Fungi	f__unclassified_k__Fungi	g__unclassified_k__Fungi	s__unclassified_k__Fungi	OTU632	0.0108927	0.304994	0.016339	0	0	0	0	0	0	0	0	0	0	0	0	0.0272316	0.0381243	0.0490169	0.0108927	0.0108927	0	0	0.0108927	0.0272316	0	0.0925875	0
d__Eukaryota	k__Fungi	p__unclassified_k__Fungi	c__unclassified_k__Fungi	o__unclassified_k__Fungi	f__unclassified_k__Fungi	g__unclassified_k__Fungi	s__unclassified_k__Fungi	OTU322	0.0217853	0.0272316	0.0108927	0.0217853	0.016339	0.016339	0	0	0	0.016339	0.0871412	0.016339	0.00544633	0.0272316	0.00544633	0.00544633	0.00544633	0	0	0	0.0108927	0.0108927	0.0108927	0.0108927	0.0217853	0	0.0108927
d__Eukaryota	k__Fungi	p__Ascomycota	c__Saccharomycetes	o__Saccharomycetales	f__Trichomonascaceae	g__Blastobotrys	s__Blastobotrys_adeninivorans	OTU891	0.0108927	0	0.0653559	0	0.00544633	0.00544633	0.00544633	0	0.0108927	0	0	0	0.0272316	0	0.0490169	0	0	0.0108927	0.016339	0	0.0108927	0	0	0.032678	0.141604	0	0.0108927
d__Eukaryota	k__Fungi	p__Basidiomycota	c__Tremellomycetes	o__Filobasidiales	f__Filobasidiaceae	g__Filobasidium	s__Filobasidium_sp	OTU468	0.304994	0.0217853	0.0816949	0	0.0708022	0.0381243	0.016339	0	0.016339	0.00544633	0.0217853	0.0217853	0.0653559	0.016339	0.0816949	0.0381243	0	0.00544633	0.0108927	0.0108927	0.00544633	0	0.00544633	0.0762486	0.413921	0.016339	0.10348
d__Eukaryota	k__Fungi	p__Mortierellomycota	c__Mortierellomycetes	o__Mortierellales	f__Mortierellaceae	g__Mortierella	s__Mortierella_gamsii	OTU588	0.261424	0.239638	2.87021	0.016339	0.517401	0.16339	0.228746	0.032678	0.413921	0.63722	0.0653559	0.141604	0.119819	0.0435706	0.016339	2.06416	1.41604	0.7407	3.16432	1.6339	0.310441	0.0272316	0.0272316	1.21453	0.566418	0.746147	0.0217853
d__Eukaryota	k__Fungi	p__unclassified_k__Fungi	c__unclassified_k__Fungi	o__unclassified_k__Fungi	f__unclassified_k__Fungi	g__unclassified_k__Fungi	s__unclassified_k__Fungi	OTU865	0.0381243	0.10348	0	0	0	0	0	0	0	0	0	0	0	0	0	0	0.20696	0.108927	0.032678	0.179729	0	0	0.0653559	0.0925875	0.0217853	0.0816949	0.174282
d__Eukaryota	k__Fungi	p__Ascomycota	c__Sordariomycetes	o__unclassified_c__Sordariomycetes	f__unclassified_c__Sordariomycetes	g__unclassified_c__Sordariomycetes	s__unclassified_c__Sordariomycetes	OTU799	0.0490169	0.0217853	0.0217853	0.0708022	0.00544633	0.0272316	0.0108927	0.0381243	0.0217853	0.032678	0.0762486	0.032678	0	0.00544633	0.0108927	0	0	0.0544633	0.00544633	0	0.10348	0.0108927	0.147051	0	0.0599096	0.0762486	0.147051
d__Eukaryota	k__Fungi	p__unclassified_k__Fungi	c__unclassified_k__Fungi	o__unclassified_k__Fungi	f__unclassified_k__Fungi	g__unclassified_k__Fungi	s__unclassified_k__Fungi	OTU803	0	0	0.108927	0	0	0	0	0	0	0	0	0	0	0	0	0	0	0	0	0.032678	0	0	0.119819	0	0	0.130712	0
d__Eukaryota	k__Fungi	p__Basidiomycota	c__Tremellomycetes	o__Tremellales	f__Trimorphomycetaceae	g__Saitozyma	s__Saitozyma_sp	OTU1264	0.511955	0.974892	0.16339	0	0	0	0	0	0	0	0	0	0.00544633	0	0	0.201514	1.27444	0.0490169	0.0762486	0.130712	0.016339	0.0762486	0.0599096	0.108927	0.032678	0.168836	0.757039
d__Eukaryota	k__Fungi	p__unclassified_k__Fungi	c__unclassified_k__Fungi	o__unclassified_k__Fungi	f__unclassified_k__Fungi	g__unclassified_k__Fungi	s__unclassified_k__Fungi	OTU1055	0	0.0108927	0	0.00544633	0.00544633	0	0.00544633	0.0925875	0.0272316	0.0108927	0.0272316	0.016339	0	0.310441	0.0272316	0	0.0816949	0	0	0.0490169	0	0.0108927	0.283209	0.032678	0.0762486	0.0435706	0.108927
d__Eukaryota	k__Fungi	p__unclassified_k__Fungi	c__unclassified_k__Fungi	o__unclassified_k__Fungi	f__unclassified_k__Fungi	g__unclassified_k__Fungi	s__unclassified_k__Fungi	OTU1117	0.00544633	0	0	0	0	0	0	0	0	0	0	0	0	0	0.0381243	0	0	0	0	0	0	0.174282	0	0	0	0	0.190621
d__Eukaryota	k__Fungi	p__Basidiomycota	c__Tremellomycetes	o__Trichosporonales	f__Trichosporonaceae	g__Vanrija	s__Vanrija_fragicola	OTU669	0.20696	0.00544633	0.179729	0.10348	0	0.114373	0.032678	0.0217853	0.0108927	0.032678	0.032678	0	0.0108927	0.0762486	0.0381243	0.419367	0.517401	0.212407	0.136158	0.0925875	0.0272316	0.190621	0.0435706	0.016339	0.0653559	0.0816949	0.304994
d__Eukaryota	k__Fungi	p__Ascomycota	c__Dothideomycetes	o__Pleosporales	f__Pleosporaceae	g__Alternaria	s__unclassified_g__Alternaria	OTU671	1.63934	0.201514	0.550079	0.0108927	0.016339	0.141604	0.0435706	0.0381243	2.26023	0.0871412	0.0272316	0.147051	0.217853	0.0544633	0.0217853	0.0708022	0.255977	0.375797	0.0871412	0.168836	0.332226	0.0108927	0.130712	0.321333	0.0599096	0.0599096	0.179729
d__Eukaryota	k__Fungi	p__unclassified_k__Fungi	c__unclassified_k__Fungi	o__unclassified_k__Fungi	f__unclassified_k__Fungi	g__unclassified_k__Fungi	s__unclassified_k__Fungi	OTU873	0	0	0	0.16339	0.190621	0.0217853	0.0653559	1.30712	0	0.0108927	0.0762486	0.0108927	0.0762486	0	0	0	0.00544633	0.00544633	0	0.016339	0.0544633	0.016339	0.0925875	0.119819	0	0.130712	0
d__Eukaryota	k__Fungi	p__unclassified_k__Fungi	c__unclassified_k__Fungi	o__unclassified_k__Fungi	f__unclassified_k__Fungi	g__unclassified_k__Fungi	s__unclassified_k__Fungi	OTU979	0	0	0.152497	0	0	0	0	0	0	0	0	0	0	0	0.0490169	0	0	0	0	0	0	0	0	0	0.108927	0.0980339	0
d__Eukaryota	k__Fungi	p__Basidiomycota	c__Tremellomycetes	o__Trichosporonales	f__Trichosporonaceae	g__Apiotrichum	s__Apiotrichum_laibachii	OTU1259	0	0	0	0	0	0	0	0	0	0	0.00544633	0	0	0	0	0	0.0980339	0.00544633	0.00544633	0	0	0.00544633	0	0.0108927	0.0108927	0.0217853	0.0435706
d__Eukaryota	k__Fungi	p__Basidiomycota	c__Agaricomycetes	o__Thelephorales	f__Thelephoraceae	g__unclassified_f__Thelephoraceae	s__Thelephoraceae_sp	OTU430	0.00544633	0.196068	0.016339	0	0.00544633	0	0	0	0.00544633	0.00544633	0.0108927	0	0	0	0.00544633	0	0.0980339	0.0708022	0.016339	0.00544633	0	0.0217853	0	0	0.00544633	0	0
d__Eukaryota	k__Fungi	p__Rozellomycota	c__unclassified_p__Rozellomycota	o__unclassified_p__Rozellomycota	f__unclassified_p__Rozellomycota	g__unclassified_p__Rozellomycota	s__Rozellomycota_sp	OTU240	0.0272316	0	0	0.0217853	0	0.00544633	0	0	0.016339	0	0	0.980339	0.0108927	0	3.1861	0	0	0	0.0272316	0	0.0544633	0.00544633	0	0	0.016339	0	0
d__Eukaryota	k__Fungi	p__unclassified_k__Fungi	c__unclassified_k__Fungi	o__unclassified_k__Fungi	f__unclassified_k__Fungi	g__unclassified_k__Fungi	s__unclassified_k__Fungi	OTU973	0	0.016339	0.0217853	0.00544633	0	0	0.0108927	0	0	0.0381243	0	0.00544633	0.0816949	0	0.0272316	0.016339	0	0.0653559	0.00544633	0.0217853	0.0108927	0.00544633	0.0108927	0	3.21333	0.0217853	0.816949
d__Eukaryota	k__Fungi	p__unclassified_k__Fungi	c__unclassified_k__Fungi	o__unclassified_k__Fungi	f__unclassified_k__Fungi	g__unclassified_k__Fungi	s__unclassified_k__Fungi	OTU1189	0	0	0	0	0	0.00544633	0.016339	0	0.016339	0.00544633	0	0	0	0	0	0.016339	0	0	0.0490169	0	0	0	0.0217853	0	0.0217853	0	0
d__Eukaryota	k__Fungi	p__Ascomycota	c__Sordariomycetes	o__Hypocreales	f__Nectriaceae	g__Thelonectria	s__Thelonectria_rubrococca	OTU647	0	0.0272316	0	0	0	0	0	0	0	0	0	0	0	0	0	0.0544633	0	0	0	0.0544633	0	0	0	0	0	0.0272316	0.00544633
d__Eukaryota	k__Fungi	p__unclassified_k__Fungi	c__unclassified_k__Fungi	o__unclassified_k__Fungi	f__unclassified_k__Fungi	g__unclassified_k__Fungi	s__unclassified_k__Fungi	OTU1024	0	0	0	0.016339	0.136158	0	0	0.0762486	0.0217853	0	1.96068	0.239638	0.0108927	0.849627	0.288655	0	0	0	0	0	0.0108927	2.61968	0.00544633	0	0.201514	0.386689	0
d__Eukaryota	k__Fungi	p__Aphelidiomycota	c__Aphelidiomycetes	o__GS16	f__unclassified_o__GS16	g__unclassified_o__GS16	s__GS16_sp	OTU160	0	0.0272316	0.0272316	0	0	0	0	0	0.00544633	0	0	0.108927	0.016339	0	0	0	0.0490169	0	0	0.0217853	0.822395	0	0.239638	0	0	0	0
d__Eukaryota	k__Fungi	p__Ascomycota	c__Sordariomycetes	o__Sordariales	f__Lasiosphaeriaceae	g__unclassified_f__Lasiosphaeriaceae	s__unclassified_f__Lasiosphaeriaceae	OTU343	0.00544633	0	0.016339	0.00544633	0	0.00544633	0.0108927	0	0.0272316	0	0	0	0.00544633	0.0108927	0	0	0	0.00544633	0.00544633	0	0.0217853	0	0	0.00544633	0.0217853	0	0
d__Eukaryota	k__Fungi	p__Ascomycota	c__Leotiomycetes	o__Helotiales	f__Helotiales_fam_Incertae_sedis	g__Acephala	s__Acephala_sp	OTU554	0	0	0.016339	0	0	0	0	0	0	0	0	0	0	0	0	0.016339	0	0.016339	0	0	0	0	0	0	0	0	0
d__Eukaryota	k__Fungi	p__Mortierellomycota	c__Mortierellomycetes	o__Mortierellales	f__Mortierellaceae	g__Mortierella	s__Mortierella_sp	OTU807	0	0.0272316	0	0	0	0	0	0	0	0.0490169	0.108927	0	0	0	0	0	0	0	0	0	0	0.00544633	0.00544633	0.217853	0	0	0
d__Eukaryota	k__Fungi	p__Basidiomycota	c__Tremellomycetes	o__Cystofilobasidiales	f__Mrakiaceae	g__Tausonia	s__Tausonia_pullulans	OTU460	1.14373	2.90834	0.539186	0.0217853	0.0544633	0.0708022	0.0653559	0.0599096	0.0435706	0.0544633	0.157943	0.0217853	0.283209	0.174282	0.0108927	0.185175	1.14373	0.141604	0.190621	0.217853	0.168836	0.032678	0.0708022	0.522847	0.119819	0.212407	0.408474
d__Eukaryota	k__Fungi	p__Basidiomycota	c__Wallemiomycetes	o__Wallemiales	f__Wallemiaceae	g__Wallemia	s__Wallemia_sp	OTU1176	0	0	0	0	0	0	0	0	0	0	0	0	0	0	0	0.114373	0	0	0.0544633	0	0.0435706	0.0544633	0.0272316	0.032678	0	0	0.0599096
d__Eukaryota	k__Fungi	p__unclassified_k__Fungi	c__unclassified_k__Fungi	o__unclassified_k__Fungi	f__unclassified_k__Fungi	g__unclassified_k__Fungi	s__unclassified_k__Fungi	OTU1336	0	0	0	0	0	0	0.0272316	0	0	0.032678	0	0	0.0217853	0	0	0	0	0.00544633	0	0	0	0	0	0	0	0	0
d__Eukaryota	k__Fungi	p__Basidiomycota	c__Agaricomycetes	o__Thelephorales	f__Thelephoraceae	g__Tomentella	s__Tomentella_coerulea	OTU603	0	0	0.119819	0	0	0	0	0	0	0	0	0	0	0	0	0.016339	0	0	0.016339	0.016339	0	0.00544633	0	0	0	0.0272316	0
d__Eukaryota	k__Fungi	p__unclassified_k__Fungi	c__unclassified_k__Fungi	o__unclassified_k__Fungi	f__unclassified_k__Fungi	g__unclassified_k__Fungi	s__unclassified_k__Fungi	OTU414	0.196068	0.174282	0	0	0	0	0	0	0	0	0	0	0	0	0	0.10348	0	0	0.0217853	0	0	0	0	0.00544633	0	0	0.604542
d__Eukaryota	k__Fungi	p__Ascomycota	c__Sordariomycetes	o__Sordariales	f__Lasiosphaeriaceae	g__Schizothecium	s__unclassified_g__Schizothecium	OTU1155	0	0	0	0	0	0	0	0	0	0	0	0	0	0	0	0.0381243	0	0	0	0.016339	0.00544633	0	0.0108927	0.0272316	0	0	0
d__Eukaryota	k__Fungi	p__Ascomycota	c__Sordariomycetes	o__Microascales	f__Microascaceae	g__Acaulium	s__Acaulium_acremonium	OTU155	0.0108927	0	0.0272316	0	0.0217853	0.0108927	0.0108927	0.0272316	0.016339	0	0.032678	0.0272316	0.0217853	0.0108927	0.0108927	0.016339	0.0435706	0.0108927	0.016339	0.0272316	0.0544633	0.0381243	0.0108927	0.0217853	0.168836	0.0544633	0
d__Eukaryota	k__Fungi	p__Basidiomycota	c__Cystobasidiomycetes	o__Erythrobasidiales	f__Erythrobasidiales_fam_Incertae_sedis	g__Sakaguchia	s__Sakaguchia_sp	OTU691	0.0272316	0	0.0108927	0	0	0.016339	0	0	0.0381243	0	0	0	0	0	0.00544633	0	0.0544633	0.20696	0	0	0.152497	0.00544633	0	0.0108927	0	0	0.00544633
d__Eukaryota	k__Fungi	p__Ascomycota	c__Sordariomycetes	o__Sordariales	f__Lasiosphaeriaceae	g__Schizothecium	s__unclassified_g__Schizothecium	OTU408	0	0.315887	0.0217853	0	0	0	0	0	0	0	0	0	0	0	0	0	0	0	0.016339	0	0	0	0	0.00544633	0	0	0.185175
d__Eukaryota	k__Fungi	p__Aphelidiomycota	c__Aphelidiomycetes	o__GS16	f__unclassified_o__GS16	g__unclassified_o__GS16	s__GS16_sp	OTU294	0	0	0	0	0.0599096	0	0	0	0	0	0	0.00544633	0	0	0.0925875	0	0	0	0	0	0	0.0272316	0	0	0.00544633	0	0
d__Eukaryota	k__Fungi	p__Basidiomycota	c__Agaricomycetes	o__unclassified_c__Agaricomycetes	f__unclassified_c__Agaricomycetes	g__unclassified_c__Agaricomycetes	s__unclassified_c__Agaricomycetes	OTU1218	0.190621	0	0	0.0108927	0	0	0.00544633	0	0	0	0	0.00544633	0	0	0	1.12739	1.51408	0.016339	0	0.0108927	0	0.00544633	0	0	0.00544633	0.016339	0.0762486
d__Eukaryota	k__Fungi	p__Ascomycota	c__Eurotiomycetes	o__Eurotiales	f__Aspergillaceae	g__Aspergillus	s__Aspergillus_penicillioides	OTU1215	0	0.00544633	0	0.00544633	0	0	0	0.0217853	0	0	0	0	0	0	0	0.016339	0.0490169	0.016339	0	0	0	0	0.00544633	0	0	0.00544633	0
d__Eukaryota	k__Fungi	p__Ascomycota	c__Sordariomycetes	o__unclassified_c__Sordariomycetes	f__unclassified_c__Sordariomycetes	g__unclassified_c__Sordariomycetes	s__unclassified_c__Sordariomycetes	OTU1240	0.00544633	0	0.0108927	0	0	0	0	0	0	0	0	0	0	0	0	0.0217853	0.773378	0.00544633	0	0	0.00544633	0.0108927	0.00544633	0	0	0	0
d__Eukaryota	k__Fungi	p__unclassified_k__Fungi	c__unclassified_k__Fungi	o__unclassified_k__Fungi	f__unclassified_k__Fungi	g__unclassified_k__Fungi	s__unclassified_k__Fungi	OTU230	0	0	0	0	0	0	0	0.0980339	0	0	0.0272316	0	0	0.245085	0	0	0	0	0	0	0	0	0	0	0	0	0
d__Eukaryota	k__Fungi	p__Mortierellomycota	c__Mortierellomycetes	o__Mortierellales	f__Mortierellaceae	g__Mortierella	s__Mortierella_elongata	OTU752	3.42574	3.50199	2.59245	27.1064	3.46386	5.17401	11.4046	4.52045	10.9852	2.23299	13.7847	10.8709	4.7383	10.0975	5.61516	4.01939	1.96068	8.55618	25.8537	4.2209	1.90077	9.84696	17.352	5.05964	8.74135	9.19885	2.29835
d__Eukaryota	k__Fungi	p__unclassified_k__Fungi	c__unclassified_k__Fungi	o__unclassified_k__Fungi	f__unclassified_k__Fungi	g__unclassified_k__Fungi	s__unclassified_k__Fungi	OTU442	0	0.0381243	0	0	0	0	0.016339	0	0	0	0	0	0	0	0	0.00544633	0	0	0	0	0.016339	0.0108927	0	0	0	0	0
d__Eukaryota	k__Fungi	p__Chytridiomycota	c__unclassified_p__Chytridiomycota	o__unclassified_p__Chytridiomycota	f__unclassified_p__Chytridiomycota	g__unclassified_p__Chytridiomycota	s__unclassified_p__Chytridiomycota	OTU570	0	0.00544633	0	0	0.0108927	0.0544633	0.016339	0.0435706	0.016339	0	0.571864	0.136158	0.0108927	0.0980339	0	0.00544633	0	0	0.713469	0.00544633	0.0871412	0.174282	0.0108927	0.108927	0.0217853	0.0272316	0.00544633
d__Eukaryota	k__Fungi	p__Ascomycota	c__Sordariomycetes	o__Hypocreales	f__Hypocreales_fam_Incertae_sedis	g__Emericellopsis	s__Emericellopsis_terricola	OTU269	0.185175	0.0871412	0.201514	0.016339	0.0980339	0.016339	0.20696	0.0490169	0.0980339	0.228746	0.0435706	0.125266	0.397582	0.250531	0.16339	0.26687	0.528294	0.125266	0.201514	0.234192	0.762486	0.168836	0.348565	0.577311	1.45417	0.332226	0.147051
d__Eukaryota	k__Fungi	p__Ascomycota	c__Sordariomycetes	o__unclassified_c__Sordariomycetes	f__unclassified_c__Sordariomycetes	g__unclassified_c__Sordariomycetes	s__unclassified_c__Sordariomycetes	OTU323	0.00544633	0	0	0.00544633	0.016339	0.0871412	0.0108927	0	0	0.00544633	0.0217853	0	0.00544633	0	0.00544633	0	0	0.0108927	0	0	0	0	0	0.016339	0	0	0.0108927
d__Eukaryota	k__Fungi	p__Ascomycota	c__unclassified_p__Ascomycota	o__unclassified_p__Ascomycota	f__unclassified_p__Ascomycota	g__unclassified_p__Ascomycota	s__unclassified_p__Ascomycota	OTU1065	0	0.0108927	0.0217853	0	0	0	0	0	0	0	0	0	0	0	0	0.00544633	0.0272316	0.0108927	0	0	0	0	0	0.0108927	0	0.0490169	0.0108927
d__Eukaryota	k__Fungi	p__Ascomycota	c__Eurotiomycetes	o__Eurotiales	f__Aspergillaceae	g__Aspergillus	s__Aspergillus_chlamydosporus	OTU667	0	0.0272316	0.0108927	0	0	0	0	0	0.016339	0.016339	0	0.0108927	0	0.0108927	0.00544633	0	0	0	0.00544633	0.0272316	0	0	0.00544633	0	0	0	0
d__Eukaryota	k__Fungi	p__Ascomycota	c__Sordariomycetes	o__Sordariales	f__Lasiosphaeriaceae	g__Schizothecium	s__unclassified_g__Schizothecium	OTU1217	0	0	0	0	0	0	0	0	0	0	0	0	0	0	0	0.0217853	0.0272316	0.0217853	0.00544633	0	0	0	0	0	0	0	0
d__Eukaryota	k__Fungi	p__Ascomycota	c__Sordariomycetes	o__Hypocreales	f__Nectriaceae	g__Gibberella	s__unclassified_g__Gibberella	OTU1015	0.152497	0.0653559	0.152497	0	0	0	0.0108927	0.00544633	0.016339	0.0217853	0.0108927	0.00544633	0.130712	0	0.0108927	0.00544633	0	0.016339	0	0	0.016339	0	0.0217853	0.016339	0.10348	0.0653559	0.0490169
d__Eukaryota	k__Fungi	p__Ascomycota	c__Dothideomycetes	o__Pleosporales	f__Massarinaceae	g__Massarina	s__Massarina_sp	OTU1195	0.0108927	0	0	0	0	0	0	0	0	0	0	0	0	0	0	0	0.032678	0	0	0	0	0	0.0217853	0	0	0	0
d__Eukaryota	k__Fungi	p__Ascomycota	c__Sordariomycetes	o__Hypocreales	f__Hypocreales_fam_Incertae_sedis	g__Acremonium	s__unclassified_g__Acremonium	OTU505	0.0381243	0	0.0490169	0	0	0	0	0	0	0	0	0	0	0	0	0	0	0	0	0	0	0	0.00544633	0	0	0	0
d__Eukaryota	k__Fungi	p__unclassified_k__Fungi	c__unclassified_k__Fungi	o__unclassified_k__Fungi	f__unclassified_k__Fungi	g__unclassified_k__Fungi	s__unclassified_k__Fungi	OTU1229	0	0	0	0	0	0	0	0	0	0	0	0	0	0	0	0	0.0381243	0	0.0272316	0	0	0	0	0.016339	0	0	0
d__Eukaryota	k__Fungi	p__Ascomycota	c__Sordariomycetes	o__Hypocreales	f__unclassified_o__Hypocreales	g__unclassified_o__Hypocreales	s__unclassified_o__Hypocreales	OTU631	0.288655	0.0925875	0.234192	0	0.032678	0.0925875	0.0925875	0.0272316	0.0599096	0.0762486	0.0108927	0.0381243	0.114373	0.0599096	0.0108927	0.386689	0.185175	0.0762486	0.147051	0.669898	0.806056	0.0217853	0.00544633	0.321333	0.108927	0.141604	0.0217853
d__Eukaryota	k__Fungi	p__Rozellomycota	c__unclassified_p__Rozellomycota	o__unclassified_p__Rozellomycota	f__unclassified_p__Rozellomycota	g__unclassified_p__Rozellomycota	s__Rozellomycota_sp	OTU929	0	0	0	0.620881	0	0.016339	0.190621	0	0	0.0217853	0	0.016339	0.114373	0	0.261424	0.0217853	0.00544633	0	0.157943	0	0.119819	1.16551	0.00544633	0	0.223299	0	0.00544633
d__Eukaryota	k__Fungi	p__Basidiomycota	c__Tremellomycetes	o__Filobasidiales	f__Piskurozymaceae	g__Solicoccozyma	s__Solicoccozyma_keelungensis	OTU1156	0	0	0	0	0	0	0	0	0	0	0	0	0	0	0	0.0108927	0	0.0108927	0.0816949	0	0.00544633	0	0.0217853	0	0	0	0
d__Eukaryota	k__Fungi	p__Ascomycota	c__Laboulbeniomycetes	o__Pyxidiophorales	f__Pyxidiophoraceae	g__Pyxidiophora	s__Pyxidiophora_arvernensis	OTU96	0	0.00544633	0	0.0217853	0.789717	0.0108927	0.016339	0.00544633	0.00544633	0.0544633	0.00544633	0.00544633	0.00544633	0.00544633	0	0.294102	0.0272316	0	0.032678	0	0.0108927	0	0	0.0490169	0.00544633	0	0
d__Eukaryota	k__Fungi	p__Basidiomycota	c__Agaricomycetes	o__Cantharellales	f__Ceratobasidiaceae	g__Rhizoctonia	s__Rhizoctonia_fusispora	OTU1249	0	0	0.0108927	0	0	0	0	0	0	0	0	0	0	0	0	0.0217853	0.0217853	0	0	0	0	0	0	0.0217853	0	0	0.016339
d__Eukaryota	k__Fungi	p__Ascomycota	c__Sordariomycetes	o__Sordariales	f__Lasiosphaeriaceae	g__Cercophora	s__Cercophora_samala	OTU242	0.00544633	0	0	0.00544633	0	0	0.032678	0	0	0.168836	0	0	0.0272316	0	0.0925875	0.00544633	0	0	0	0	0	0.0108927	0	0.00544633	0.00544633	0	0
d__Eukaryota	k__Fungi	p__Basidiomycota	c__Tremellomycetes	o__Trichosporonales	f__Trichosporonaceae	g__Apiotrichum	s__unclassified_g__Apiotrichum	OTU491	0.0490169	0	0.0490169	0	0	0	0	0	0	0	0	0	0	0	0	0	0	0	0	0	0	0	0	0	0.0272316	0	0
d__Eukaryota	k__Fungi	p__Ascomycota	c__Sordariomycetes	o__Hypocreales	f__Nectriaceae	g__unclassified_f__Nectriaceae	s__unclassified_f__Nectriaceae	OTU696	0.642667	0.691683	0.762486	0.0435706	0.0490169	0.10348	0.108927	0.114373	0.0762486	0.234192	0.196068	0.0925875	0.190621	0.375797	0.108927	0.10348	0.37035	0.190621	0.0871412	0.212407	0.304994	0.125266	0.16339	0.47383	0.288655	0.272316	0.299548
d__Eukaryota	k__Fungi	p__Ascomycota	c__Dothideomycetes	o__Pleosporales	f__Didymellaceae	g__Epicoccum	s__Epicoccum_nigrum	OTU1225	0.190621	0.359458	0.0381243	0	0	0	0	0	0	0.0381243	0	0	0.0272316	0.00544633	0	0.0708022	0.212407	0.00544633	0.032678	0.310441	0	0	0.130712	0.0435706	0.0599096	0.392136	0
d__Eukaryota	k__Fungi	p__Ascomycota	c__Sordariomycetes	o__unclassified_c__Sordariomycetes	f__unclassified_c__Sordariomycetes	g__unclassified_c__Sordariomycetes	s__unclassified_c__Sordariomycetes	OTU159	0	0	0	0	0	0.0544633	0	0	0.0381243	0.0108927	0	0.016339	0	0	0.0108927	0	0	0.032678	0.0108927	0	0	0.016339	0	0.00544633	0.016339	0	0
d__Eukaryota	k__Fungi	p__Basidiomycota	c__Cystobasidiomycetes	o__Cystobasidiales	f__Cystobasidiaceae	g__Cystobasidium	s__Cystobasidium_laryngis	OTU351	0	0	0.0108927	0.0108927	0	0	0	0	0	0	0	0	0	0	0	0.00544633	0.032678	0	0	0	0.00544633	0	0	0	0	0	0
d__Eukaryota	k__Fungi	p__Rozellomycota	c__unclassified_p__Rozellomycota	o__unclassified_p__Rozellomycota	f__unclassified_p__Rozellomycota	g__unclassified_p__Rozellomycota	s__Rozellomycota_sp	OTU331	0	0	0	0	0.00544633	0.00544633	0	0.0108927	0	0	0.016339	0.0599096	0	0.00544633	0.0108927	0	0	0	0	0	0	0	0	0	0	0	0
d__Eukaryota	k__Fungi	p__Basidiomycota	c__Tremellomycetes	o__Tremellales	f__Bulleribasidiaceae	g__Vishniacozyma	s__unclassified_g__Vishniacozyma	OTU608	0	0	0	0.0599096	0	0.0490169	0.0217853	0	0	0	0	0	0	0.228746	0	0	0	0	0.0490169	0	0.00544633	0	0	0	0	0	0
d__Eukaryota	k__Fungi	p__Ascomycota	c__Eurotiomycetes	o__Eurotiales	f__Aspergillaceae	g__Penicillium	s__Penicillium_rubidurum	OTU1061	0	0	0.00544633	0	0	0	0	0	0	0	0	0	0.016339	0	0	0	0	0.00544633	0	0	0	0.0108927	0	0.00544633	0.0217853	0.0108927	0.00544633
d__Eukaryota	k__Fungi	p__Basidiomycota	c__Tremellomycetes	o__Tremellales	f__Bulleribasidiaceae	g__Vishniacozyma	s__Vishniacozyma_carnescens	OTU461	0.00544633	0.157943	0.0980339	0	0	0.00544633	0	0	0	0	0	0	0	0	0.0108927	0.00544633	0.190621	0	0.0708022	0	0.0108927	0.0653559	0.114373	0.016339	0	0.119819	0.0653559
d__Eukaryota	k__Fungi	p__Ascomycota	c__Eurotiomycetes	o__Eurotiales	f__Trichocomaceae	g__Sagenomella	s__Sagenomella_oligospora	OTU1211	0.032678	0	0	0	0	0.016339	0	0	0	0	0	0	0	0	0	0	0.0217853	0.0108927	0	0	0.0108927	0	0.00544633	0.0108927	0	0.0217853	0.0435706
d__Eukaryota	k__Fungi	p__Ascomycota	c__Dothideomycetes	o__Pleosporales	f__Didymosphaeriaceae	g__Paraphaeosphaeria	s__Paraphaeosphaeria_sporulosa	OTU1120	0	0	0.0816949	0	0	0	0	0	0	0	0	0	0	0	0	0	0.315887	0	0.0599096	0.00544633	0	0	0	0.0544633	0	0.0108927	0.0653559
d__Eukaryota	k__Fungi	p__unclassified_k__Fungi	c__unclassified_k__Fungi	o__unclassified_k__Fungi	f__unclassified_k__Fungi	g__unclassified_k__Fungi	s__unclassified_k__Fungi	OTU1126	0	0	0	0	0.0108927	0	0	0	0	0	0	0	0.0217853	0	0	0	0	0	0	0	0	0	0	0	0	0	0.228746
d__Eukaryota	k__Fungi	p__Ascomycota	c__Sordariomycetes	o__Trichosphaeriales	f__Trichosphaeriaceae	g__Nigrospora	s__Nigrospora_oryzae	OTU519	0.00544633	0.108927	0.032678	0	0	0.00544633	0.00544633	0	0	0.00544633	0	0	0	0	0	0.032678	0.0871412	0.00544633	0.00544633	0	0.00544633	0	0	0	0.0381243	0.0217853	0.016339
d__Eukaryota	k__Fungi	p__unclassified_k__Fungi	c__unclassified_k__Fungi	o__unclassified_k__Fungi	f__unclassified_k__Fungi	g__unclassified_k__Fungi	s__unclassified_k__Fungi	OTU749	0	0	0	0	0	0	0.0108927	0	0	0.0108927	0	0	0.0108927	0	0.032678	0	0	0	0.364904	0	0.032678	0.141604	0	0	0	0	0
d__Eukaryota	k__Fungi	p__Basidiomycota	c__Agaricomycetes	o__Thelephorales	f__Thelephoraceae	g__unclassified_f__Thelephoraceae	s__Thelephoraceae_sp	OTU1256	8.49082	15.7562	9.20974	0	0	0	0	0	0	0	0	0	0	0	0	5.91471	7.27085	3.45842	1.43783	1.27444	0.0653559	0.0816949	2.4454	3.12619	2.87566	8.32743	8.96465
d__Eukaryota	k__Fungi	p__Ascomycota	c__Eurotiomycetes	o__Eurotiales	f__Aspergillaceae	g__Penicillium	s__Penicillium_oxalicum	OTU101	0.0272316	0	0.016339	0.00544633	0.0272316	0	0.0217853	0	0.0108927	0.0272316	0.00544633	0	0.0653559	0.321333	0.0217853	0.0653559	0.0381243	0	0	0.0381243	0.10348	0.0272316	0	0.016339	1.23087	0	0
d__Eukaryota	k__Fungi	p__unclassified_k__Fungi	c__unclassified_k__Fungi	o__unclassified_k__Fungi	f__unclassified_k__Fungi	g__unclassified_k__Fungi	s__unclassified_k__Fungi	OTU934	0	0	0.0925875	0.212407	0	0.0217853	0.0381243	0	0.0816949	0	0	0	0	0	0	0	0	0	0.495616	0	1.98246	0.615435	0	0	0.321333	0	0.26687
d__Eukaryota	k__Fungi	p__unclassified_k__Fungi	c__unclassified_k__Fungi	o__unclassified_k__Fungi	f__unclassified_k__Fungi	g__unclassified_k__Fungi	s__unclassified_k__Fungi	OTU931	0	0	0	0.00544633	0	0.00544633	0.00544633	0	0	0.0381243	0.00544633	0.0272316	0	0.0980339	0.032678	0	0	0	0	0	0.00544633	0.016339	0	0	0.016339	0	0
d__Eukaryota	k__Fungi	p__Ascomycota	c__Sordariomycetes	o__Microascales	f__Microascaceae	g__Scedosporium	s__Scedosporium_dehoogii	OTU629	0.0108927	0	0.0108927	0	0	0	0.0108927	0	0	0	0.032678	0	0	0	0	0	0	0.0653559	0	0.179729	0.0217853	0	0	0.016339	0	0.0108927	0
d__Eukaryota	k__Fungi	p__unclassified_k__Fungi	c__unclassified_k__Fungi	o__unclassified_k__Fungi	f__unclassified_k__Fungi	g__unclassified_k__Fungi	s__unclassified_k__Fungi	OTU413	0	0.0762486	0	0	0	0	0	0	0	0	0	0	0	0	0	0	0	0	0.0272316	0.0435706	0	0	0.00544633	0.0272316	0.00544633	0	0.0762486
d__Eukaryota	k__Fungi	p__Ascomycota	c__Sordariomycetes	o__unclassified_c__Sordariomycetes	f__unclassified_c__Sordariomycetes	g__unclassified_c__Sordariomycetes	s__unclassified_c__Sordariomycetes	OTU126	0	0.212407	0	0	0.0544633	0	0.0108927	0.457491	0.0544633	0.0925875	1.23087	0.00544633	0.0653559	0.0871412	0.0708022	0	0.0217853	0.157943	0	0.0762486	0.114373	0.114373	0.16339	0.0272316	0.0108927	0.0925875	0.0925875
d__Eukaryota	k__Fungi	p__Basidiomycota	c__Agaricomycetes	o__Cantharellales	f__Ceratobasidiaceae	g__unclassified_f__Ceratobasidiaceae	s__Ceratobasidiaceae_sp	OTU906	0	0	0.0544633	0	0	0	0	0	0	0	0	0	0	0	0	0.0108927	0	0	0	0.0272316	0	0	0	0.00544633	0.0108927	0	0
d__Eukaryota	k__Fungi	p__unclassified_k__Fungi	c__unclassified_k__Fungi	o__unclassified_k__Fungi	f__unclassified_k__Fungi	g__unclassified_k__Fungi	s__unclassified_k__Fungi	OTU1078	0	0	0	0	0	0	0.032678	0	0	0	0	0.016339	0	0	0.0217853	0	0	0.0108927	0.00544633	0	0	0.00544633	0	0	0.108927	0	0.0435706
d__Eukaryota	k__Fungi	p__Ascomycota	c__Eurotiomycetes	o__Onygenales	f__Arthrodermataceae	g__Arthroderma	s__Arthroderma_multifidum	OTU663	0	0	0	0	0	0	0	0	0	0	0	0	0.016339	0	0	0	0	0	0	0.0108927	0.00544633	0.0108927	0	0.0108927	0.00544633	0	0
d__Eukaryota	k__Fungi	p__Ascomycota	c__Leotiomycetes	o__Helotiales	f__Hyaloscyphaceae	g__Cistella	s__Cistella_sp	OTU459	0.0708022	0.0708022	0	0	0	0	0	0	0	0	0	0	0	0	0	0.0217853	0	0.0544633	0.016339	0.0217853	0	0	0	0.00544633	0.0217853	0	0.0108927
d__Eukaryota	k__Fungi	p__Ascomycota	c__Leotiomycetes	o__Helotiales	f__Vibrisseaceae	g__Phialocephala	s__Phialocephala_humicola	OTU1124	0.141604	0.310441	0.0599096	0	0	0	0	0	0	0	0	0	0	0	0	0	0	0.0653559	0	0	0.016339	0	0.136158	0.0272316	0.201514	0.0381243	0.0980339
d__Eukaryota	k__Fungi	p__Basidiomycota	c__Tremellomycetes	o__Tremellales	f__Bulleribasidiaceae	g__Vishniacozyma	s__Vishniacozyma_sp	OTU778	0.10348	0.294102	0.239638	0.136158	0	0.108927	0.0272316	0.147051	0.00544633	0.032678	0	0.0217853	0.0762486	0	0	0.0544633	0.261424	0.119819	0.0925875	0.119819	0.0544633	0.217853	0.272316	0.16339	0.0381243	0.147051	0.250531
d__Eukaryota	k__Fungi	p__unclassified_k__Fungi	c__unclassified_k__Fungi	o__unclassified_k__Fungi	f__unclassified_k__Fungi	g__unclassified_k__Fungi	s__unclassified_k__Fungi	OTU859	0.00544633	0.0544633	0	0	0	0.00544633	0	0	0.00544633	0	0	0.032678	0	0	0.0435706	0	0	0.0381243	0.00544633	0	0.00544633	0	0	0.0108927	0.00544633	0	0.190621
d__Eukaryota	k__Fungi	p__unclassified_k__Fungi	c__unclassified_k__Fungi	o__unclassified_k__Fungi	f__unclassified_k__Fungi	g__unclassified_k__Fungi	s__unclassified_k__Fungi	OTU397	0.16339	0.239638	0.119819	0	0	0	0	0	0	0	0	0	0	0	0	0	0.0925875	0.0544633	0.0217853	0	0.0272316	0.130712	0	0.016339	0	0	0.119819
d__Eukaryota	k__Fungi	p__Ascomycota	c__Dothideomycetes	o__Dothideomycetes_ord_Incertae_sedis	f__Eremomycetaceae	g__Arthrographis	s__unclassified_g__Arthrographis	OTU1312	0.0762486	0.212407	0.234192	0.0599096	0.0708022	0.0217853	0.348565	0.016339	0.016339	0.0544633	0.0108927	0.0217853	0.0381243	0.0435706	0.0217853	0.0435706	0.16339	0.032678	0.00544633	0.261424	0.0708022	0.0544633	0.032678	0.0816949	0.0108927	0.0490169	0.212407
d__Eukaryota	k__Fungi	p__Basidiomycota	c__Agaricomycetes	o__Cantharellales	f__Ceratobasidiaceae	g__unclassified_f__Ceratobasidiaceae	s__Ceratobasidiaceae_sp	OTU509	0	0	0.0925875	0	0	0	0	0	0	0	0	0	0	0	0	0	0	0	0	0.0108927	0	0	0.016339	0	0	0.016339	0.00544633
d__Eukaryota	k__Fungi	p__Basidiomycota	c__Agaricomycetes	o__Thelephorales	f__Thelephoraceae	g__Tomentella	s__unclassified_g__Tomentella	OTU356	0.16339	0.255977	0.0435706	0	0	0	0	0	0	0	0	0	0	0	0	0.0217853	0	0	0	0	0	0	0	0.0272316	0.0980339	0.108927	0
d__Eukaryota	k__Fungi	p__Zoopagomycota	c__Zoopagomycetes	o__Zoopagales	f__Piptocephalidaceae	g__Syncephalis	s__Syncephalis_sp	OTU1122	0.00544633	0	0.0381243	0.032678	0	0	0	0	0.00544633	0.00544633	0	0	0.032678	0	0.00544633	0	0.016339	0	0	0	0.00544633	0	0	0.0108927	0	0	0.310441
d__Eukaryota	k__Fungi	p__Mortierellomycota	c__Mortierellomycetes	o__Mortierellales	f__Mortierellaceae	g__Mortierella	s__Mortierella_elongatula	OTU899	0.108927	0	0	0	0.016339	0	0	0.00544633	0	0.0544633	0	0.0272316	0.032678	0.032678	0.0544633	0	0	0.00544633	0.00544633	0	0.00544633	0.00544633	0	0.0381243	0.0381243	0.032678	0.0816949
d__Eukaryota	k__Fungi	p__unclassified_k__Fungi	c__unclassified_k__Fungi	o__unclassified_k__Fungi	f__unclassified_k__Fungi	g__unclassified_k__Fungi	s__unclassified_k__Fungi	OTU1270	0	0	0	0	0	0	0.0217853	0	0	0	0	0	0	0	0.0925875	0	0.10348	0.147051	0	0	1.20364	0	0	0	0.016339	0	0.0925875
d__Eukaryota	k__Fungi	p__unclassified_k__Fungi	c__unclassified_k__Fungi	o__unclassified_k__Fungi	f__unclassified_k__Fungi	g__unclassified_k__Fungi	s__unclassified_k__Fungi	OTU404	0.0108927	1.14917	0.0762486	0.108927	0.0217853	0.0816949	0.0381243	0.032678	0.0980339	0.0490169	0.0871412	0.0544633	0	0.168836	0.185175	0	0	0.016339	0	0.136158	0.016339	0	0.0435706	0.108927	0.0381243	0.0217853	0.0217853
d__Eukaryota	k__Fungi	p__Basidiomycota	c__Agaricomycetes	o__Thelephorales	f__Thelephoraceae	g__Thelephora	s__Thelephora_atra	OTU606	0.141604	1.00212	0.250531	0	0	0	0	0	0	0	0	0	0	0	0	0.168836	0.141604	0.141604	0.0272316	0.016339	0	0.00544633	0.0980339	0.0762486	0.0925875	0.413921	0.419367
d__Eukaryota	k__Fungi	p__unclassified_k__Fungi	c__unclassified_k__Fungi	o__unclassified_k__Fungi	f__unclassified_k__Fungi	g__unclassified_k__Fungi	s__unclassified_k__Fungi	OTU1323	0	0	0	0	0	0	0	0	0	0	0	0	0	0	0	0	0.10348	0.0381243	0	0	0	0	0.0599096	0	0	0	0
d__Eukaryota	k__Fungi	p__unclassified_k__Fungi	c__unclassified_k__Fungi	o__unclassified_k__Fungi	f__unclassified_k__Fungi	g__unclassified_k__Fungi	s__unclassified_k__Fungi	OTU1085	0	0	0	0	0	0	0.0217853	0	0	0	0.130712	0.0108927	0.0217853	0	0.032678	0	0	0.0816949	0.00544633	0	0.0599096	0.108927	0	0.0544633	0.261424	0	0.0980339
d__Eukaryota	k__Fungi	p__unclassified_k__Fungi	c__unclassified_k__Fungi	o__unclassified_k__Fungi	f__unclassified_k__Fungi	g__unclassified_k__Fungi	s__unclassified_k__Fungi	OTU688	0	0	0	0.00544633	0.016339	0	0	0.0108927	0	0	0.00544633	0.016339	0.00544633	0.00544633	0.0762486	0	0	0	0	0	0.00544633	0.00544633	0	0.00544633	0.00544633	0	0
d__Eukaryota	k__Fungi	p__Mortierellomycota	c__Mortierellomycetes	o__Mortierellales	f__Mortierellaceae	g__Mortierella	s__Mortierella_ambigua	OTU922	0.577311	0.147051	0.413921	0.261424	0.032678	0	0.0653559	0.0599096	0.0490169	0.016339	0.125266	0.0599096	0.0381243	0.288655	0.0762486	0.0108927	0.0708022	0.0381243	0.0435706	0.0435706	0.0381243	0.0599096	0.0272316	0.0816949	0.147051	0.261424	0.174282
d__Eukaryota	k__Fungi	p__Ascomycota	c__Dothideomycetes	o__Pleosporales	f__Pleosporales_fam_Incertae_sedis	g__Polyschema	s__Polyschema_sclerotigenum	OTU394	0.288655	0.0925875	0.0108927	0	0	0	0	0	0	0	0.00544633	0	0	0.234192	0	0	0	0.016339	0	0	0.00544633	0	0	0.0217853	0	0	0
d__Eukaryota	k__Fungi	p__unclassified_k__Fungi	c__unclassified_k__Fungi	o__unclassified_k__Fungi	f__unclassified_k__Fungi	g__unclassified_k__Fungi	s__unclassified_k__Fungi	OTU599	0	0	0	0.0381243	0	0	0	0	0	0	0	0	0	0	0	0	0	0	1.57399	0	0	0	0	0	0.0217853	0	0
d__Eukaryota	k__Fungi	p__Ascomycota	c__Leotiomycetes	o__Helotiales	f__Helotiales_fam_Incertae_sedis	g__Mycoarthris	s__Mycoarthris_sp	OTU1326	0	0	0.0653559	0	0	0	0	0	0	0	0	0	0	0	0	0	0	0.0544633	0	0	0	0	0.032678	0	0.00544633	0.0544633	0.0435706
d__Eukaryota	k__Fungi	p__Basidiomycota	c__unclassified_p__Basidiomycota	o__unclassified_p__Basidiomycota	f__unclassified_p__Basidiomycota	g__unclassified_p__Basidiomycota	s__unclassified_p__Basidiomycota	OTU613	0.0381243	0.272316	0.0108927	0.168836	0.125266	0.114373	0.179729	0.125266	0.283209	0.0272316	0.0544633	0.0217853	0.185175	0	0.0599096	0.441152	0.20696	0.0217853	2.84298	0.108927	0.0435706	0.196068	0.16339	0.0272316	0.0871412	0.0925875	0.190621
d__Eukaryota	k__Fungi	p__Ascomycota	c__Sordariomycetes	o__Hypocreales	f__Nectriaceae	g__Neocosmospora	s__Neocosmospora_rubicola	OTU1052	0.827842	1.69381	1.12739	0.332226	0.168836	0.288655	0.234192	0.174282	0.245085	0.517401	0.457491	0.223299	0.392136	1.42149	0.217853	0.0980339	0.403028	0.713469	0.201514	0.69713	0.495616	0.299548	0.479277	1.30712	0.822395	0.795164	0.582757
d__Eukaryota	k__Fungi	p__Ascomycota	c__Archaeorhizomycetes	o__unclassified_c__Archaeorhizomycetes	f__unclassified_c__Archaeorhizomycetes	g__unclassified_c__Archaeorhizomycetes	s__unclassified_c__Archaeorhizomycetes	OTU1320	0	0.168836	0.0708022	0	0	0	0	0	0	0	0	0	0	0	0	0	0	0.0599096	0	0	0	0	0	0	0.0435706	0	0.152497
d__Eukaryota	k__Fungi	p__Glomeromycota	c__Paraglomeromycetes	o__Paraglomerales	f__unclassified_o__Paraglomerales	g__unclassified_o__Paraglomerales	s__unclassified_o__Paraglomerales	OTU1243	0	0.272316	0.0544633	0	0	0	0	0	0	0	0	0	0	0	0	0.0217853	0.228746	0.0217853	0.032678	0.0108927	0	0	0.0108927	0.0272316	0.0217853	0.0490169	0
d__Eukaryota	k__Fungi	p__Ascomycota	c__Sordariomycetes	o__Sordariales	f__Chaetomiaceae	g__Chaetomium	s__unclassified_g__Chaetomium	OTU205	0.0708022	0.0217853	0.119819	0.00544633	0.0762486	0.0653559	0.0599096	0.00544633	0.108927	0.506508	0.00544633	0.0599096	0.659006	0.32678	0.0653559	0.648113	0.168836	0.0435706	0.0762486	0.0708022	4.25903	0.0871412	0	0.664452	0.980339	0.196068	0
d__Eukaryota	k__Fungi	p__Basidiomycota	c__Tremellomycetes	o__Filobasidiales	f__Filobasidiaceae	g__Naganishia	s__Naganishia_randhawae	OTU1210	0.032678	0.0871412	0.114373	0	0	0	0	0	0	0	0	0	0	0	0	0.0490169	0.0108927	0	0.016339	0.0544633	0	0	0.0762486	0.032678	0	0.0272316	0.0925875
d__Eukaryota	k__Fungi	p__unclassified_k__Fungi	c__unclassified_k__Fungi	o__unclassified_k__Fungi	f__unclassified_k__Fungi	g__unclassified_k__Fungi	s__unclassified_k__Fungi	OTU1252	0.0435706	0.114373	0.0272316	0.0925875	0.0381243	0.0653559	0.0108927	0.0217853	0.0381243	0.0217853	0.288655	0.0272316	0	0.0490169	0.0925875	0.0217853	0.0708022	0	0.00544633	0.00544633	0.0272316	0.0272316	0	0.016339	0.0980339	0.0217853	0.0816949
d__Eukaryota	k__Fungi	p__unclassified_k__Fungi	c__unclassified_k__Fungi	o__unclassified_k__Fungi	f__unclassified_k__Fungi	g__unclassified_k__Fungi	s__unclassified_k__Fungi	OTU1087	0.00544633	0	0	0.0490169	0	0	0	0.0217853	0	0	0.0381243	0	0	0	0	0	0	0	0	0	0.0108927	0.0108927	0	0	0.0272316	0.0272316	0.375797
d__Eukaryota	k__Fungi	p__Mortierellomycota	c__unclassified_p__Mortierellomycota	o__unclassified_p__Mortierellomycota	f__unclassified_p__Mortierellomycota	g__unclassified_p__Mortierellomycota	s__Mortierellomycotina	OTU204	0	0	0	0	0	0	0.0108927	0	0	0	0	0.0217853	0	0.0435706	0	0	0.0816949	0	0	0	0	0	0	0	0	0	0
d__Eukaryota	k__Fungi	p__Aphelidiomycota	c__Aphelidiomycetes	o__GS16	f__unclassified_o__GS16	g__unclassified_o__GS16	s__GS16_sp	OTU307	0.0435706	0	0.0381243	0	0	0.0599096	0	0.0381243	0	0	0.032678	0.016339	0	0.0435706	0.0108927	0	0	0.00544633	0.00544633	0.0381243	0.00544633	0.0217853	0	0.0708022	0	0.0108927	0
d__Eukaryota	k__Fungi	p__Ascomycota	c__Sordariomycetes	o__unclassified_c__Sordariomycetes	f__unclassified_c__Sordariomycetes	g__unclassified_c__Sordariomycetes	s__unclassified_c__Sordariomycetes	OTU299	0	0.016339	0	0	0.0435706	0	0.016339	0.00544633	0	0	0.0108927	0	0.0108927	0.0272316	0	0	0	0	0	0.016339	0	0	0	0.00544633	0.0490169	0	0
d__Eukaryota	k__Fungi	p__Ascomycota	c__Dothideomycetes	o__Pleosporales	f__Didymosphaeriaceae	g__Paraphaeosphaeria	s__Paraphaeosphaeria_sporulosa	OTU1281	0.032678	0.26687	0.0272316	0	0	0	0	0	0	0	0	0	0	0	0	0.0435706	0.0435706	0.00544633	0.016339	0	0	0	0	0	0.016339	0	0.016339
d__Eukaryota	k__Fungi	p__Chytridiomycota	c__Rhizophydiomycetes	o__Rhizophydiales	f__Rhizophydiaceae	g__Rhizophydium	s__Rhizophydium_collapsum	OTU74	0.00544633	0	0	0	0	0	0	0	0.016339	0	0	0	0	0	0	0	0	0.152497	0	0	0.00544633	0	0	0	0	0	0
d__Eukaryota	k__Fungi	p__unclassified_k__Fungi	c__unclassified_k__Fungi	o__unclassified_k__Fungi	f__unclassified_k__Fungi	g__unclassified_k__Fungi	s__unclassified_k__Fungi	OTU444	0	0.0599096	0.016339	0	0	0	0	0	0	0	0	0	0	0	0	0	0	0	0	0	0	0	0	0.0108927	0	0	0
d__Eukaryota	k__Fungi	p__Basidiomycota	c__Agaricomycetes	o__Tremellodendropsidales	f__unclassified_o__Tremellodendropsidales	g__unclassified_o__Tremellodendropsidales	s__Tremellodendropsidales_sp	OTU1313	0	0	0	0	0	0	0	0	0	0	0	0	0	0	0	0	0	0.0272316	0	0.00544633	0	0	0.016339	0	0	0	0
d__Eukaryota	k__Fungi	p__unclassified_k__Fungi	c__unclassified_k__Fungi	o__unclassified_k__Fungi	f__unclassified_k__Fungi	g__unclassified_k__Fungi	s__unclassified_k__Fungi	OTU446	0.00544633	0.10348	0	0	0	0	0	0	0	0.00544633	0.016339	0.016339	0	0	0.00544633	0	0	0.016339	0	0	0	0	0	0.00544633	0	0	0
d__Eukaryota	k__Fungi	p__unclassified_k__Fungi	c__unclassified_k__Fungi	o__unclassified_k__Fungi	f__unclassified_k__Fungi	g__unclassified_k__Fungi	s__unclassified_k__Fungi	OTU843	0.20696	0	0.179729	0	0	0	0	0	0	0	0	0	0	0	0	0	0	0	0	0	0	0	0.190621	0	0	0	0
d__Eukaryota	k__Fungi	p__Ascomycota	c__Leotiomycetes	o__Helotiales	f__Helotiales_fam_Incertae_sedis	g__Chalara	s__Chalara_heteroderae	OTU860	0.0272316	0	0.016339	0	0.0108927	0	0	0	0	0	0	0	0.016339	0	0	0	0	0	0	0.0108927	0.0272316	0	0	0.0108927	0.0217853	0	0
d__Eukaryota	k__Fungi	p__Ascomycota	c__Pezizomycetes	o__Pezizales	f__Ascobolaceae	g__Ascobolus	s__Ascobolus_sp	OTU295	0.0435706	0.10348	0.0435706	0.00544633	0.0217853	0.00544633	0	0.00544633	0	0	0.0217853	0.0108927	0.0108927	0.0217853	0.016339	0	0	0	0	0	0	0	0.0108927	0	0	0.0217853	0
d__Eukaryota	k__Fungi	p__Ascomycota	c__Sordariomycetes	o__Sordariales	f__Lasiosphaeriaceae	g__Schizothecium	s__unclassified_g__Schizothecium	OTU281	0.0108927	0.00544633	0.0544633	0.016339	0.00544633	0.00544633	0.0708022	0.0653559	0.0816949	0.0272316	0.119819	0	0.0544633	0.00544633	0.0980339	0.0490169	0.217853	0.0108927	0.190621	0.0490169	0.114373	0.10348	0.288655	0.032678	0.53374	0.0599096	0.0217853
d__Eukaryota	k__Fungi	p__Ascomycota	c__Sordariomycetes	o__Sordariales	f__Lasiosphaeriaceae	g__Echria	s__Echria_sp	OTU377	0.125266	0	0.168836	0	0	0	0	0	0	0	0	0	0	0	0	0	0	0.0653559	0	0.0381243	0.0435706	0.0381243	0	0.032678	0	0.016339	0.0381243
d__Eukaryota	k__Fungi	p__unclassified_k__Fungi	c__unclassified_k__Fungi	o__unclassified_k__Fungi	f__unclassified_k__Fungi	g__unclassified_k__Fungi	s__unclassified_k__Fungi	OTU389	0.114373	0.0381243	0.00544633	0	0	0	0.00544633	0.0108927	0	0	0.0272316	0	0.0490169	0	0	0	0.016339	0	0	0.0272316	0.0108927	0.0217853	0.0272316	0	0	0	0.032678
d__Eukaryota	k__Fungi	p__Ascomycota	c__Sordariomycetes	o__Hypocreales	f__Nectriaceae	g__Fusicolla	s__Fusicolla_aquaeductuum	OTU4	0.0108927	0	0.00544633	0	0.0108927	0	0.0108927	0	0.00544633	0.0217853	0	0	0.00544633	0	0.00544633	0.00544633	0.0708022	0	0.00544633	0.00544633	0	0.0108927	0	0.00544633	0.0435706	0	0
d__Eukaryota	k__Fungi	p__unclassified_k__Fungi	c__unclassified_k__Fungi	o__unclassified_k__Fungi	f__unclassified_k__Fungi	g__unclassified_k__Fungi	s__unclassified_k__Fungi	OTU1108	0	0	0	0.0762486	0	0	0	0.0272316	0	0	0.0381243	0	0.0108927	0	0	0	0	0	0	0	0	0	0	0	0	0	0.0599096
d__Eukaryota	k__Fungi	p__unclassified_k__Fungi	c__unclassified_k__Fungi	o__unclassified_k__Fungi	f__unclassified_k__Fungi	g__unclassified_k__Fungi	s__unclassified_k__Fungi	OTU1100	0	0	0	0	0	0	0	0	0	0	0	0	0	0	0	0	0	0	0.0108927	0	0	0	0	0.0217853	0	0	0.0217853
d__Eukaryota	k__Fungi	p__Basidiomycota	c__unclassified_p__Basidiomycota	o__unclassified_p__Basidiomycota	f__unclassified_p__Basidiomycota	g__unclassified_p__Basidiomycota	s__unclassified_p__Basidiomycota	OTU1185	0.0108927	0	0	0.00544633	0	0	0	0	0.016339	0	0	0.00544633	0	0	0.0217853	0.0217853	0	0	0	0	0	0	0	0	0.00544633	0.00544633	0
d__Eukaryota	k__Fungi	p__Basidiomycota	c__Wallemiomycetes	o__Wallemiales	f__Wallemiaceae	g__Wallemia	s__Wallemia_sp	OTU567	0	0	0	0	0	0	0	0	0	0	0	0	0	0	0	0	0	0.0925875	0.0108927	0.016339	0.0599096	0.0490169	0.0217853	0.0217853	0	0	0
d__Eukaryota	k__Fungi	p__Ascomycota	c__Sordariomycetes	o__Sordariales	f__Chaetomiaceae	g__Chaetomium	s__Chaetomium_sp	OTU1159	0.114373	0.0381243	0.250531	0.00544633	0.234192	0.468384	0.343119	0.0435706	0.337672	0.501062	0.0980339	0.147051	0.876859	1.13828	0.190621	0.506508	0.304994	0.10348	0.125266	0.288655	4.47143	0.185175	0.016339	0.544633	2.27656	0.566418	0.00544633
d__Eukaryota	k__Fungi	p__Basidiomycota	c__Agaricomycetes	o__Russulales	f__unclassified_o__Russulales	g__unclassified_o__Russulales	s__unclassified_o__Russulales	OTU1303	0.0381243	0.125266	0	0	0	0	0	0	0	0	0	0	0	0	0	0.0708022	0.032678	0.016339	0	0	0	0	0	0.00544633	0.0217853	0	0.00544633
d__Eukaryota	k__Fungi	p__Basidiomycota	c__Tremellomycetes	o__Tremellales	f__Bulleribasidiaceae	g__Hannaella	s__Hannaella_oryzae	OTU317	0.125266	0.789717	0	0	0.0925875	0.10348	0.0108927	0.00544633	0.196068	0.0108927	0.0272316	0.108927	0	0	0.0544633	0.0381243	0.0762486	0.016339	0.125266	0	0.217853	0.016339	0.0925875	0.141604	0	0.10348	0
d__Eukaryota	k__Fungi	p__Olpidiomycota	c__Olpidiomycetes	o__Olpidiales	f__Olpidiaceae	g__Olpidium	s__Olpidium_sp	OTU114	0	0.0762486	0	0.00544633	0	0	0	0.0108927	0	0	0.157943	0	0	0	0	0.0272316	0.0217853	0	0.0272316	0	0	0	0	0.157943	0.0435706	0.0599096	0.00544633
d__Eukaryota	k__Fungi	p__Ascomycota	c__Dothideomycetes	o__Pleosporales	f__unclassified_o__Pleosporales	g__unclassified_o__Pleosporales	s__unclassified_o__Pleosporales	OTU373	0.228746	0	0.0435706	0	0	0.00544633	0	0	0.016339	0	0	0	0	0.00544633	0	0.0381243	0	0.0544633	0.0108927	0.16339	0	0	0	0	0.114373	0.0762486	0.245085
d__Eukaryota	k__Fungi	p__Basidiomycota	c__Malasseziomycetes	o__Malasseziales	f__Malasseziaceae	g__Malassezia	s__Malassezia_sp	OTU499	0.0108927	0	0.174282	0	0	0	0.00544633	0.00544633	0	0.0108927	0.00544633	0	0.0435706	0	0	0.0217853	0.0381243	0	0.0272316	0.00544633	0.0108927	0	0	0.0108927	0.130712	0	0.00544633
d__Eukaryota	k__Fungi	p__Basidiomycota	c__Tremellomycetes	o__Tremellales	f__Tremellaceae	g__Cryptococcus_f__Tremellaceae	s__Cryptococcus_rajasthanensis	OTU75	0	0.0381243	0	0.0816949	0	0.0490169	0	0	0.0272316	0	0	0	0	0	0	0	0	0	0	0	0	0	0.0108927	0.00544633	0	0.0217853	0
d__Eukaryota	k__Fungi	p__Basidiomycota	c__Microbotryomycetes	o__Sporidiobolales	f__Sporidiobolaceae	g__Rhodotorula	s__Rhodotorula_ingeniosa	OTU262	0.00544633	0	0	0.016339	0	0	0	0	0	0	0	0	0.0108927	0	0.016339	0	0.0272316	0	0	0	0	0.0108927	0.0217853	0	0.0217853	0.032678	0.0599096
d__Eukaryota	k__Fungi	p__unclassified_k__Fungi	c__unclassified_k__Fungi	o__unclassified_k__Fungi	f__unclassified_k__Fungi	g__unclassified_k__Fungi	s__unclassified_k__Fungi	OTU579	0	0	0	0	0.016339	0.0599096	0.10348	0	0	0.0272316	0	0	0	0	0.00544633	0	0.130712	0.00544633	0.016339	0	0.016339	0.032678	0	0	0	0	0
d__Eukaryota	k__Fungi	p__Zoopagomycota	c__Zoopagomycetes	o__Zoopagales	f__Zoopagaceae	g__Acaulopage	s__Acaulopage_sp	OTU819	0	0	0	0	0	0.0108927	0	0	0	0.245085	0.0272316	0.0108927	0	0.0108927	0.032678	0	0.00544633	0	0.0435706	0	0.00544633	0.0108927	0.157943	0.0108927	0.0272316	0	0.0272316
d__Eukaryota	k__Fungi	p__unclassified_k__Fungi	c__unclassified_k__Fungi	o__unclassified_k__Fungi	f__unclassified_k__Fungi	g__unclassified_k__Fungi	s__unclassified_k__Fungi	OTU1076	0	0	0	0	0	0	0	0.0217853	0.0762486	0	0.0653559	0	0	0	0.00544633	0.016339	0	0	0	0.032678	0	0	0.168836	0.032678	0.00544633	0	0.63722
d__Eukaryota	k__Fungi	p__unclassified_k__Fungi	c__unclassified_k__Fungi	o__unclassified_k__Fungi	f__unclassified_k__Fungi	g__unclassified_k__Fungi	s__unclassified_k__Fungi	OTU1070	0.0708022	0.032678	0.403028	0	0	0	0	0	0	0	0	0	0	0	0	0.0435706	0.0871412	0.141604	0.0871412	0.0272316	0	0	0.0762486	0.190621	0.0217853	0.16339	0.185175
d__Eukaryota	k__Fungi	p__Ascomycota	c__Sordariomycetes	o__unclassified_c__Sordariomycetes	f__unclassified_c__Sordariomycetes	g__unclassified_c__Sordariomycetes	s__unclassified_c__Sordariomycetes	OTU318	0	0	0	0.0599096	0	0.0435706	0	0	0	0	0	0	0	0	0	0	0	0	0.00544633	0	0	0	0	0.00544633	0	0	0
d__Eukaryota	k__Fungi	p__unclassified_k__Fungi	c__unclassified_k__Fungi	o__unclassified_k__Fungi	f__unclassified_k__Fungi	g__unclassified_k__Fungi	s__unclassified_k__Fungi	OTU980	0	0	0	0.119819	0.0435706	0.0272316	0.0108927	0.0108927	0.0272316	0.212407	0.174282	0.174282	0.0381243	0.168836	0.185175	0.0762486	0	0.016339	0.0108927	0.00544633	0.125266	0.114373	0	0.0925875	1.16007	0.00544633	0.147051
d__Eukaryota	k__Fungi	p__Mortierellomycota	c__Mortierellomycetes	o__Mortierellales	f__Mortierellaceae	g__Mortierella	s__Mortierella_capitata	OTU1139	0.0217853	0	0.016339	0	0	0.00544633	0.00544633	0	0.0108927	0.0762486	0	0.00544633	0.0217853	0.0381243	0	0.0653559	0.00544633	0	0	0	0.0272316	0	0	0.032678	0.0272316	0.00544633	0
d__Eukaryota	k__Fungi	p__Ascomycota	c__Sordariomycetes	o__Hypoceales	f__Catabotrydaceae	g__Botryosporium	s__Botryosporium_longibrachiatum	OTU993	0.016339	0	0.032678	0	0	0	0.00544633	0	0.0108927	0.016339	0	0	0.00544633	0.0272316	0	0.032678	0.0217853	0	0	0	0.228746	0	0	0	0.0871412	0	0
d__Eukaryota	k__Fungi	p__Basidiomycota	c__Agaricomycetes	o__Russulales	f__Russulaceae	g__Russula	s__Russula_medullata	OTU1304	1.99336	3.67627	2.16764	0	0	0	0	0	0	0	0	0	0	0	0	1.59033	2.42362	0.604542	0.479277	0.174282	0.0108927	0	0.288655	0.767932	0.675344	1.91166	1.42149
d__Eukaryota	k__Fungi	p__Ascomycota	c__Orbiliomycetes	o__Orbiliales	f__Orbiliales_fam_Incertae_sedis	g__Vermispora	s__Vermispora_spermatophaga	OTU215	0.0108927	0	0.00544633	0	0	0	0	0.00544633	0.00544633	0.0108927	0.00544633	0	0	0.0272316	0	0	0	0	0	0	0	0	0	0.0381243	0	0.0653559	0
d__Eukaryota	k__Fungi	p__Ascomycota	c__Sordariomycetes	o__Microascales	f__Microascaceae	g__unclassified_f__Microascaceae	s__unclassified_f__Microascaceae	OTU791	6.51381	5.84935	7.91351	1.00212	4.09564	7.14013	4.23724	2.90834	7.25451	7.75557	5.95283	7.50504	20.2222	16.8836	5.64239	1.76461	4.30804	5.57704	2.94102	12.1453	4.54224	7.46147	11.0724	7.04755	19.7266	21.965	3.77975
d__Eukaryota	k__Fungi	p__Ascomycota	c__Dothideomycetes	o__Capnodiales	f__Cladosporiaceae	g__Cladosporium	s__Cladosporium_delicatulum	OTU1226	0.0490169	0.0108927	0.147051	0	0.0381243	0.0708022	0.016339	0.00544633	0.0435706	0.0490169	0	0	0.0108927	0	0.00544633	0.392136	0.631774	0.016339	0.032678	0.10348	0.130712	0	0.00544633	0.0490169	0.016339	0.0435706	0
d__Eukaryota	k__Fungi	p__Mortierellomycota	c__Mortierellomycetes	o__Mortierellales	f__Mortierellaceae	g__Mortierella	s__unclassified_g__Mortierella	OTU1090	0.0544633	0	0.0816949	0.114373	0.00544633	0.0381243	0.0762486	0.0544633	0.0490169	0.016339	0.0490169	0.032678	0.0272316	0.10348	0.0599096	0.0435706	0.0490169	0.0272316	0.136158	0.00544633	0.016339	0.0816949	0.0980339	0.00544633	0.0599096	0.0435706	0.0871412
d__Eukaryota	k__Fungi	p__Ascomycota	c__Sordariomycetes	o__Glomerellales	f__Plectosphaerellaceae	g__Plectosphaerella	s__Plectosphaerella_sp	OTU57	0.016339	0	0	0	0	0.00544633	0	0	0.0217853	0	0	0	0.00544633	0	0.0108927	0	0	0.016339	0	0	0	0	0	0	0	0	0.00544633
d__Eukaryota	k__Fungi	p__Rozellomycota	c__Rozellomycotina_cls_Incertae_sedis	o__Branch03	f__unclassified_o__Branch03	g__unclassified_o__Branch03	s__Branch03_sp	OTU847	0	0.147051	0.0653559	0	0	0.0108927	0	0	0	0	0	0	0	0	0	0	0	0.0272316	0	0.196068	0.0108927	0	0.261424	0.0435706	0.217853	0	0
d__Eukaryota	k__Fungi	p__Ascomycota	c__Leotiomycetes	o__unclassified_c__Leotiomycetes	f__unclassified_c__Leotiomycetes	g__unclassified_c__Leotiomycetes	s__unclassified_c__Leotiomycetes	OTU1203	0.0599096	0.0708022	0.108927	0	0	0	0	0	0	0	0	0	0	0	0	0.168836	0.90409	0.0217853	0.0435706	0.0871412	0	0	0	0.0108927	0.0544633	0.0708022	0.0108927
d__Eukaryota	k__Fungi	p__unclassified_k__Fungi	c__unclassified_k__Fungi	o__unclassified_k__Fungi	f__unclassified_k__Fungi	g__unclassified_k__Fungi	s__unclassified_k__Fungi	OTU841	0.0272316	0	0.147051	0.223299	0.00544633	0.0653559	0.0108927	0.016339	0.016339	0.10348	0.130712	0.0708022	0	1.22542	0.0490169	0	0	0	0.00544633	0.0490169	0.00544633	0.43026	4.48777	0.664452	4.91259	0.0381243	4.14465
d__Eukaryota	k__Fungi	p__unclassified_k__Fungi	c__unclassified_k__Fungi	o__unclassified_k__Fungi	f__unclassified_k__Fungi	g__unclassified_k__Fungi	s__unclassified_k__Fungi	OTU475	0.0435706	0.0435706	0.0435706	0	0	0	0	0	0	0	0	0.00544633	0	0	0	0.0108927	0	0.00544633	0	0	0	0	0	0.0217853	0	0.0708022	0
d__Eukaryota	k__Fungi	p__Ascomycota	c__Archaeorhizomycetes	o__Archaeorhizomycetales	f__Archaeorhizomycetaceae	g__Archaeorhizomyces	s__Archaeorhizomyces_sp	OTU601	0	0.136158	0	0	0	0	0	0	0	0	0	0	0	0	0	0	0	0.0708022	0.0599096	0	0	0	0.108927	0.0108927	0.032678	0.0762486	0
d__Eukaryota	k__Fungi	p__unclassified_k__Fungi	c__unclassified_k__Fungi	o__unclassified_k__Fungi	f__unclassified_k__Fungi	g__unclassified_k__Fungi	s__unclassified_k__Fungi	OTU709	0	0	0	0.0108927	0.016339	0.0272316	0.00544633	0	0.0272316	0.0490169	0.0381243	0.0108927	0.00544633	0.016339	0.0272316	0	0	0	0	0	0	0.0108927	0	0	0.0108927	0	0
d__Eukaryota	k__Fungi	p__unclassified_k__Fungi	c__unclassified_k__Fungi	o__unclassified_k__Fungi	f__unclassified_k__Fungi	g__unclassified_k__Fungi	s__unclassified_k__Fungi	OTU695	0.168836	0.0490169	0.141604	0.310441	0.0381243	0	0.147051	0	0.0544633	0.016339	0.0599096	0.0435706	0.032678	0	0.108927	0.0381243	0.0272316	1.19275	0.0762486	0.0108927	0.37035	0.0653559	0.016339	0.255977	0.773378	0.0599096	0.413921
d__Eukaryota	k__Fungi	p__Ascomycota	c__Pezizomycetes	o__Pezizales	f__Ascodesmidaceae	g__Cephaliophora	s__Cephaliophora_sp	OTU1113	0	0	0.0980339	0	0.00544633	0.00544633	0.00544633	0	0.0381243	0	0.032678	0.016339	0.0435706	0	0.00544633	0	0.0217853	0	0	0	0.0108927	0	0.00544633	0	0.0108927	0	0.0980339
d__Eukaryota	k__Fungi	p__Basidiomycota	c__Tremellomycetes	o__Tremellales	f__Bulleraceae	g__Bullera	s__Bullera_alba	OTU960	0.032678	0.0381243	0.119819	0.0871412	0.016339	0.0272316	0.0108927	0.016339	0.00544633	0.016339	0	0.00544633	0.016339	0.0544633	0.462938	0.566418	0	0	0.016339	0	0.0272316	0.0217853	0.0108927	0	0.10348	0.0272316	0.10348
d__Eukaryota	k__Fungi	p__unclassified_k__Fungi	c__unclassified_k__Fungi	o__unclassified_k__Fungi	f__unclassified_k__Fungi	g__unclassified_k__Fungi	s__unclassified_k__Fungi	OTU324	0.0217853	0	0	0	0	0.185175	0	0	0	0	0	0	0	0	0	0	0	0.00544633	0.00544633	0	0.909537	0	0	0.016339	0	0	0.354011
d__Eukaryota	k__Fungi	p__Ascomycota	c__Eurotiomycetes	o__Chaetothyriales	f__Herpotrichiellaceae	g__Cladophialophora	s__Cladophialophora_chaetospira	OTU441	0.0381243	0.0381243	0	0	0	0	0	0	0	0	0	0	0	0	0	0.016339	0.0544633	0	0	0.016339	0	0	0.00544633	0.0381243	0.00544633	0.0599096	0.0108927
d__Eukaryota	k__Fungi	p__Basidiomycota	c__Agaricomycetes	o__Sebacinales	f__Serendipitaceae	g__Serendipita	s__Serendipita_sp	OTU830	0	0	0	0	0	0	0	0	0	0	0	0	0	0	0	0.0653559	0	0	0	0.0108927	0.00544633	0	0.032678	0	0	0	0
d__Eukaryota	k__Fungi	p__Ascomycota	c__Pezizomycetes	o__Pezizales	f__Ascodesmidaceae	g__Eleutherascus	s__Eleutherascus_cristatus	OTU206	0	0.0980339	0.0544633	0	0	0	0	0.0108927	0.016339	0.00544633	0.00544633	0	0.00544633	0.0435706	0	0	0	0.0108927	0.00544633	0	0.00544633	0.016339	0	0	0	0	0
d__Eukaryota	k__Fungi	p__Basidiomycota	c__Agaricomycetes	o__Thelephorales	f__Thelephoraceae	g__Tomentella	s__unclassified_g__Tomentella	OTU816	0.0381243	0	0	0	0	0	0	0	0	0	0	0	0	0	0	0	0	0	0	0	0	0	0.016339	0	0	0	0.0599096
d__Eukaryota	k__Fungi	p__unclassified_k__Fungi	c__unclassified_k__Fungi	o__unclassified_k__Fungi	f__unclassified_k__Fungi	g__unclassified_k__Fungi	s__unclassified_k__Fungi	OTU627	0	0.708022	0.310441	0	0	0	0	0	0	0	0	0	0	0	0	0	0	0	0.179729	0.0762486	0	0.0762486	0	0	0.0108927	0	0
d__Eukaryota	k__Fungi	p__unclassified_k__Fungi	c__unclassified_k__Fungi	o__unclassified_k__Fungi	f__unclassified_k__Fungi	g__unclassified_k__Fungi	s__unclassified_k__Fungi	OTU237	0.032678	0	0.0653559	0.0381243	0.016339	0.00544633	0.0272316	0.00544633	0	0.0217853	0.16339	0	0	0.310441	0.0108927	0.0381243	0	0.0272316	0.00544633	0.0381243	0.130712	0	0.0217853	0.0108927	0.016339	0.0108927	0.0544633
d__Eukaryota	k__Fungi	p__unclassified_k__Fungi	c__unclassified_k__Fungi	o__unclassified_k__Fungi	f__unclassified_k__Fungi	g__unclassified_k__Fungi	s__unclassified_k__Fungi	OTU238	0	0	0.10348	0	0.0217853	0.152497	0	0	0.0544633	0	0	0	0	0	0.00544633	0	0	0.00544633	0.381243	0	0.032678	0.0816949	0.0490169	0	0	0.0381243	0
d__Eukaryota	k__Fungi	p__unclassified_k__Fungi	c__unclassified_k__Fungi	o__unclassified_k__Fungi	f__unclassified_k__Fungi	g__unclassified_k__Fungi	s__unclassified_k__Fungi	OTU580	0.0272316	0	0.0653559	0	0	0	0	0	0	0	0	0	0	0	0	0.016339	0	0	0.016339	0	0	0	0	0	0	0	0.0653559
d__Eukaryota	k__Fungi	p__Ascomycota	c__Dothideomycetes	o__Pleosporales	f__Didymellaceae	g__Paraboeremia	s__unclassified_g__Paraboeremia	OTU393	0.757039	0.887751	0.26687	0	0.00544633	0	0.201514	0	0	0	0.00544633	0.016339	0.0217853	0.0490169	0.0653559	0	0	0.0544633	0.0108927	0	0.0108927	0.0653559	0.0762486	0.016339	0.190621	0.0599096	0.0871412
d__Eukaryota	k__Fungi	p__Basidiomycota	c__Agaricomycetes	o__Agaricales	f__Clavariaceae	g__unclassified_f__Clavariaceae	s__unclassified_f__Clavariaceae	OTU863	0.032678	0	0	0	0	0	0	0	0	0	0	0	0	0	0	0.0762486	0.375797	0	0	0	0	0	0	0.0599096	0	0	0.0544633
d__Eukaryota	k__Fungi	p__Mortierellomycota	c__Mortierellomycetes	o__Mortierellales	f__Mortierellaceae	g__Mortierella	s__Mortierella_alpina	OTU97	0.0925875	0.261424	0.136158	0.0272316	0.0435706	0.0108927	0.016339	0.032678	0.0544633	0.0653559	0.234192	0.0272316	0.00544633	0.261424	0.0708022	0.0381243	0.0653559	0.0816949	0.0108927	0.0762486	0.0217853	0.0217853	0.0708022	0.130712	0.016339	0.212407	0.0435706
d__Eukaryota	k__Fungi	p__unclassified_k__Fungi	c__unclassified_k__Fungi	o__unclassified_k__Fungi	f__unclassified_k__Fungi	g__unclassified_k__Fungi	s__unclassified_k__Fungi	OTU495	0.0108927	0.00544633	0.0108927	0	0	0	0	0	0	0	0	0	0	0.00544633	0	0	0	0	0	0	0	0	0	0.00544633	0	0.016339	0
d__Eukaryota	k__Fungi	p__Ascomycota	c__Leotiomycetes	o__Helotiales	f__unclassified_o__Helotiales	g__unclassified_o__Helotiales	s__unclassified_o__Helotiales	OTU469	0.00544633	0.0217853	0.0381243	0	0	0	0	0	0	0	0	0	0	0	0	0.0925875	0.179729	0	0.0435706	0.0272316	0	0	0	0.016339	0.00544633	0.0217853	0
d__Eukaryota	k__Fungi	p__Ascomycota	c__Dothideomycetes	o__Pleosporales	f__Didymosphaeriaceae	g__Pseudopithomyces	s__Pseudopithomyces_chartarum	OTU1330	0	0	0.00544633	0	0.00544633	0.0217853	0	0.0108927	0.016339	0.00544633	0	0	0.016339	0.00544633	0.00544633	0	0	0.016339	0	0	0	0	0.00544633	0.0762486	0	0	0
d__Eukaryota	k__Fungi	p__Rozellomycota	c__unclassified_p__Rozellomycota	o__unclassified_p__Rozellomycota	f__unclassified_p__Rozellomycota	g__unclassified_p__Rozellomycota	s__Rozellomycota_sp	OTU92	0	0	0	0	0	0	0	0	0.0108927	0.0381243	0.0108927	0.0108927	0	0.032678	0.0108927	0	0	0	0	0	0	0	0	0	0.0108927	0	0
d__Eukaryota	k__Fungi	p__Basidiomycota	c__Agaricomycetes	o__Thelephorales	f__Thelephoraceae	g__Tomentella	s__Tomentella_stuposa	OTU1164	0	0.108927	0.321333	0	0	0	0	0	0	0	0	0	0	0	0	0.152497	0.10348	0.0272316	0.0435706	0.032678	0	0	0.0544633	0.0599096	0.0816949	0.136158	0.119819
d__Eukaryota	k__Fungi	p__Rozellomycota	c__unclassified_p__Rozellomycota	o__unclassified_p__Rozellomycota	f__unclassified_p__Rozellomycota	g__unclassified_p__Rozellomycota	s__Rozellomycota_sp	OTU133	0	0	0	0	0	0.0108927	0	0	0.0871412	0.0108927	0.0272316	0.0108927	0.0381243	0	0.462938	0	0.0108927	0.0272316	0.294102	0	0.016339	0.0108927	0.0217853	0.00544633	0.0381243	0.0108927	0
d__Eukaryota	k__Fungi	p__Ascomycota	c__Sordariomycetes	o__Hypocreales	f__Nectriaceae	g__Fusarium	s__Fusarium_delphinoides	OTU585	0.152497	0	0.0490169	0.0599096	0.288655	0.0272316	0.0871412	0.0217853	0.0381243	0.0980339	0.108927	0.0599096	0.0980339	0.392136	0.0762486	0.0217853	0.0435706	0.032678	0.0816949	0.114373	0.10348	0.0544633	0.0544633	0.310441	0.174282	0.185175	0.130712
d__Eukaryota	k__Fungi	p__unclassified_k__Fungi	c__unclassified_k__Fungi	o__unclassified_k__Fungi	f__unclassified_k__Fungi	g__unclassified_k__Fungi	s__unclassified_k__Fungi	OTU1162	0	0	0.0653559	0	0	0	0	0	0	0	0	0	0	0	0	0.0871412	0	0	0.0108927	0	0	0	0	0.032678	0	0.0544633	0
d__Eukaryota	k__Fungi	p__Ascomycota	c__Sordariomycetes	o__unclassified_c__Sordariomycetes	f__unclassified_c__Sordariomycetes	g__unclassified_c__Sordariomycetes	s__unclassified_c__Sordariomycetes	OTU660	0.0925875	0	0.0217853	0.032678	0.0108927	0.0217853	0.016339	0.0217853	0.00544633	0.0381243	0.0272316	0.0217853	0.016339	0	0.0925875	0.00544633	0.108927	0.0925875	0	0.223299	0.032678	0.0544633	0.26687	0.032678	0.0272316	0.0708022	0.0925875
d__Eukaryota	k__Fungi	p__Ascomycota	c__Sordariomycetes	o__Hypocreales	f__Nectriaceae	g__Dactylonectria	s__unclassified_g__Dactylonectria	OTU1103	0.0381243	0.0217853	0	0.00544633	0.00544633	0	0	0	0	0	0	0	0	0	0.00544633	0	0	0.00544633	0	0	0.016339	0	0.00544633	0.016339	0.0435706	0	0.136158
d__Eukaryota	k__Fungi	p__Mortierellomycota	c__Mortierellomycetes	o__Mortierellales	f__Mortierellaceae	g__Mortierella	s__Mortierella_alpina	OTU1219	0.157943	0.321333	0.702576	0.0272316	0.0980339	0.0708022	0.0544633	0.0490169	0.0871412	0.20696	0.0435706	0.0544633	0.119819	0.304994	0.0435706	0.223299	0.141604	0.0980339	0.283209	0.0871412	0.0544633	0.0217853	0.016339	0.446599	0.223299	0.0762486	0.0435706
d__Eukaryota	k__Fungi	p__Ascomycota	c__Sordariomycetes	o__Glomerellales	f__Plectosphaerellaceae	g__Sodiomyces	s__unclassified_g__Sodiomyces	OTU199	0.0381243	0.0980339	0.0708022	0.0708022	0.0490169	0.032678	0.032678	0.00544633	0.0599096	0.0435706	0.0381243	0.0108927	0.0599096	0.0381243	0.016339	0.00544633	0	0.0925875	0	0.0871412	0.0435706	0.00544633	0.168836	0.0871412	0.0381243	0.299548	0.0925875
d__Eukaryota	k__Fungi	p__unclassified_k__Fungi	c__unclassified_k__Fungi	o__unclassified_k__Fungi	f__unclassified_k__Fungi	g__unclassified_k__Fungi	s__unclassified_k__Fungi	OTU829	0	0	0	0	0	0	0	0	0	0.00544633	0	0	0	0	0.0108927	0	0	0	0.0108927	0	0	0.0217853	0.0653559	0.032678	0	0	0
d__Eukaryota	k__Fungi	p__Basidiomycota	c__Microbotryomycetes	o__Sporidiobolales	f__Sporidiobolaceae	g__Sporidiobolus	s__Sporidiobolus_pararoseus	OTU1311	0.130712	0.0381243	0.0980339	0.0108927	0.708022	0.0381243	0.0108927	0.0490169	0.0925875	0.0108927	0.00544633	0.0653559	0.0108927	0.0108927	0.00544633	0.283209	0.16339	0.119819	0.196068	0.032678	0.0599096	0	0.00544633	0.0599096	0.016339	0.032678	0.00544633
d__Eukaryota	k__Fungi	p__Basidiomycota	c__Agaricomycetes	o__Russulales	f__Russulaceae	g__Lactarius	s__Lactarius_lacunarum	OTU479	0.0108927	0.016339	0.0599096	0	0	0	0	0	0	0	0	0	0	0	0	0.016339	0.00544633	0.0108927	0	0	0	0	0.0108927	0.0217853	0	0	0.0381243
d__Eukaryota	k__Fungi	p__Basidiomycota	c__Agaricomycetes	o__unclassified_c__Agaricomycetes	f__unclassified_c__Agaricomycetes	g__unclassified_c__Agaricomycetes	s__unclassified_c__Agaricomycetes	OTU999	2.57067	5.38097	3.46386	0	0	0	0	0	0	0	0	0	0	0	0	1.74827	3.75252	1.29078	0.757039	0.686237	0.0871412	0.0108927	1.19819	0.827842	1.45962	2.29835	2.65781
d__Eukaryota	k__Fungi	p__Basidiomycota	c__Tremellomycetes	o__Tremellales	f__Bulleribasidiaceae	g__Hannaella	s__Hannaella_surugaensis	OTU864	0	0	0	0	0	0	0.00544633	0	0	0	0	0	0	0	0	0.0435706	0.0544633	0	0	0.0490169	0	0.0108927	0	0.0217853	0	0	0
d__Eukaryota	k__Fungi	p__unclassified_k__Fungi	c__unclassified_k__Fungi	o__unclassified_k__Fungi	f__unclassified_k__Fungi	g__unclassified_k__Fungi	s__unclassified_k__Fungi	OTU1095	0	0	0	0.0381243	0.032678	0.032678	0	0	0	0	0	0.0108927	0	0	0.0217853	0	0	0.0217853	0.0108927	0.0653559	0.125266	0.0653559	0	0	0	0	0.108927
d__Eukaryota	k__Fungi	p__Ascomycota	c__Sordariomycetes	o__unclassified_c__Sordariomycetes	f__unclassified_c__Sordariomycetes	g__unclassified_c__Sordariomycetes	s__unclassified_c__Sordariomycetes	OTU1196	0.0108927	0.016339	0.0108927	0	0	0	0	0	0	0	0	0	0	0	0	0.125266	0.0816949	0	0	0	0	0	0	0	0.00544633	0.016339	0
d__Eukaryota	k__Fungi	p__Basidiomycota	c__Tremellomycetes	o__Tremellales	f__Tremellaceae	g__Cryptococcus_f__Tremellaceae	s__Cryptococcus_aureus	OTU417	0.599096	2.17853	0.0871412	0.0762486	0.0599096	0.136158	0.00544633	0.10348	0.0381243	0.00544633	0	0.0816949	0.0544633	0.0272316	0.795164	0.108927	0.0980339	0.0272316	0.130712	0.147051	0.0435706	0.00544633	0.119819	0.125266	0.0490169	0.0544633	0.375797
d__Eukaryota	k__Fungi	p__Ascomycota	c__Sordariomycetes	o__Hypocreales	f__Hypocreaceae	g__Trichoderma	s__unclassified_g__Trichoderma	OTU848	0	0	0	0	0	0	0.00544633	0	0	0	0	0	0	0.016339	0	0	0.016339	0.00544633	0	0	0.0272316	0	0	0.00544633	0.016339	0	0
d__Eukaryota	k__Fungi	p__Ascomycota	c__Eurotiomycetes	o__Eurotiales	f__Aspergillaceae	g__Xeromyces	s__Xeromyces_bisporus	OTU165	0	0	0	0	0	0.0435706	0.0108927	0.0272316	0.00544633	0.0108927	0.00544633	0.0272316	0.0272316	0	0.0381243	0	0	0	0	0	0.00544633	0	0	0	0	0	0
